# Supplementary material for: Host Transcriptional Response to Influenza and Other Acute Respiratory Viral Infections – A Prospective Cohort Study
Source: PLoS Pathog. 2015 Jun 12;11(6):e1004869. doi: 10.1371/journal.ppat.1004869 (PMC4466531; doi:10.1371/journal.ppat.1004869)
Supplement: S5 Table — (XLSX) [file ppat.1004869.s013.xlsx]

## Sheet: DEGs on Day0
Differentially expressed genes on the first day (Day 0) of influenza virus infection
[B.H. adjusted P value <0.05 in both year 2009-2010 and 2010-2011]
nuID	Gene Symbol	Gene Name	logFC	AveExpr	t	P.Value	adj.P.Val	B
rupwjK1x5AUVdTP1sU	IFI44L	interferon-induced protein 44-like	4.183	9.69405	37.0117	3.55376e-35	6.293e-31	67.5694
uF4JJC4mp6Ku5KGF70	ISG15	ISG15 ubiquitin-like modifier	4.13918	10.0887	19.929	7.23706e-24	9.85799e-21	43.9289
N4OCV6LHOJqV4h6eeE	IFIT1	interferon-induced protein with tetratricopeptide repeats 1	4.13071	10.2957	21.2955	4.92456e-25	8.72042e-22	46.4891
oUL016nU_reU_ae0_Y	IFI27	interferon, alpha-inducible protein 27	4.09252	9.35412	9.72643	1.32202e-12	2.27285e-10	18.5528
ijfUpc6MjSik0eKUok	IFITM3	interferon induced transmembrane protein 3	3.99168	11.5799	14.0776	4.87472e-18	2.21337e-15	30.9076
NZ6BfqQoIO4kIsiIuU	RSAD2	radical S-adenosyl methionine domain containing 2	3.80144	9.58891	23.2785	1.27084e-26	2.813e-23	49.9392
fSohbtLKju5enuxurs	LY6E	lymphocyte antigen 6 complex, locus E	3.72575	11.3425	28.4592	2.79307e-30	2.47299e-26	57.7046
HFS7.KJOLlu7ubXtok	MX1	myxovirus (influenza virus) resistance 1, interferon-inducible protein p78 (mouse)	3.63449	11.4198	21.7659	2.01708e-25	3.96871e-22	47.3349
9lUF6j54kqCf5O_dwo	IFIT3	interferon-induced protein with tetratricopeptide repeats 3	3.62394	10.0747	21.2407	5.46959e-25	8.80504e-22	46.3895
0B2unl2eOJ63mNeDqo	IFI6	interferon, alpha-inducible protein 6	3.57929	10.3183	23.7849	5.21e-27	1.53764e-23	50.7739
Tpa8gVuHs93V_jFXOU	HERC5	hect domain and RLD 5	3.42337	10.1761	17.7562	7.14848e-22	5.50371e-19	39.5121
iqLR_Of0rw0ic6ucSk	EPSTI1	epithelial stromal interaction 1 (breast)	3.3033	10.0211	24.9063	7.65606e-28	2.71147e-24	52.5596
0nhUk0lEd6voA7_Xvo	IFIT2	interferon-induced protein with tetratricopeptide repeats 2	3.19009	11.1317	17.4204	1.50996e-21	1.1141e-18	38.7886
WneIYOc6nkjh98ij_U	IFI44	interferon-induced protein 44	3.18953	9.32683	25.1953	4.72701e-28	2.09265e-24	53.0065
EEDSXrRSf9oEkiESKk	IFIT3	interferon-induced protein with tetratricopeptide repeats 3	3.10403	9.98978	18.4799	1.47806e-22	1.37755e-19	41.0333
oid6lfUuflFcTHf7ek	OAS2	2'-5'-oligoadenylate synthetase 2, 69/71kDa	3.07096	10.3765	23.3246	1.17101e-26	2.813e-23	50.0159
fAEA0FqFUn.SB5KgEk	IFIT3	interferon-induced protein with tetratricopeptide repeats 3	2.97327	9.37337	18.8109	7.30248e-23	7.6066e-20	41.712
0IiH14JJlUUJ0Il01k	OAS1	2'-5'-oligoadenylate synthetase 1, 40/46kDa	2.87946	9.56197	19.373	2.25469e-23	2.85186e-20	42.8407
N4YTYufXzonoklZcgU	IRF7	interferon regulatory factor 7	2.86368	10.7013	18.4908	1.40435e-22	4.14471e-19	40.9505
TpnrGwMhQ5Lyunf1CE	OAS3	2'-5'-oligoadenylate synthetase 3, 100kDa	2.79557	9.20821	19.9988	6.28701e-24	9.27753e-21	44.0634
ukoevq3qjc6TUIS4R0	OASL	2'-5'-oligoadenylate synthetase-like	2.72065	9.30907	14.6442	1.13651e-18	5.75009e-16	32.3354
055155VOJ7lC7lSp5M	MT1A	metallothionein 1A	2.71265	10.1379	11.7856	2.6255e-15	7.0443e-13	24.7125
o3qVxJeiBeiDXEVEgU	XAF1	XIAP associated factor 1	2.67868	9.62797	25.7605	1.86704e-28	1.10205e-24	53.865
3Aq_iknpEIp4peng8U	OAS1	2'-5'-oligoadenylate synthetase 1, 40/46kDa	2.65009	9.49566	13.6673	1.40678e-17	7.16214e-15	29.8327
ivdSKCuggFOpKLKD4s	GBP1	guanylate binding protein 1, interferon-inducible	2.6381	10.0759	13.2246	4.61064e-17	2.14856e-14	28.6729
Nk_t6ULcQ7VDNChBRU	GBP1	guanylate binding protein 1, interferon-inducible	2.40693	9.53511	13.5875	1.73916e-17	8.32355e-15	29.6257
TpXkSunv37e87SKBLU	STAT2	signal transducer and activator of transcription 2, 113kDa	2.36125	10.5596	14.0434	5.22764e-18	2.98616e-15	30.7983
H5lhjlSDUgf7c0d1UE	IFI6	interferon, alpha-inducible protein 6	2.29937	11.5821	12.9819	8.93009e-17	3.95335e-14	28.0262
lUECOC9XNxoCk4eopU	LAP3	leucine aminopeptidase 3	2.28189	9.56096	12.8759	1.19453e-16	5.1592e-14	27.7414
3t9fhRTT15ePIqfXTo	SAMD9L	sterile alpha motif domain containing 9-like	2.20659	9.46828	17.4488	1.38062e-21	2.44479e-18	38.7665
lkoEEjkoEp5EnSRBPU	GBP5	guanylate binding protein 5	2.11051	9.84704	11.1955	1.4575e-14	4.16281e-12	23.0243
BhFLTHp0qVFnDl8OA0	TRIM22	tripartite motif containing 22	2.09225	9.7172	15.5272	1.23675e-19	1.04288e-16	34.4357
6suzRLLJdSv18KhBNc	TNFSF10	tumor necrosis factor (ligand) superfamily, member 10	2.08122	10.3793	11.3969	8.03961e-15	2.45458e-12	23.6097
3XUk9LUqolGgFO9_fA	UBE2L6	ubiquitin-conjugating enzyme E2L 6	2.04378	11.6369	15.6347	9.52048e-20	8.42943e-17	34.6889
uUK90R6Xqfq5UzKK3s	IFI35	interferon-induced protein 35	2.02394	9.60319	11.34	9.50518e-15	2.85284e-12	23.445
KZTRJ4H74jVbvHlzSQ	STAT1	signal transducer and activator of transcription 1, 91kDa	2.02263	11.3081	13.6543	1.45605e-17	7.16214e-15	29.7991
HU6l.0SqESn3wBBWn0	GBP4	guanylate binding protein 4	2.00366	9.4622	9.12575	8.89212e-12	1.41857e-09	16.6973
fb3eXRMnxCUnogM6x0	EIF2AK2	eukaryotic translation initiation factor 2-alpha kinase 2	1.97491	9.53909	14.0829	4.71654e-18	2.78402e-15	30.8986
ix1KUCgkUiUOgfjpXA	STAT1	signal transducer and activator of transcription 1, 91kDa	1.96674	9.72744	14.7446	8.63576e-19	5.66378e-16	32.5507
ikRLn9bpHkxDeKXXd0	STAT1	signal transducer and activator of transcription 1, 91kDa	1.93609	10.0668	16.1261	2.92463e-20	3.04643e-17	35.8295
xqk3l6LxfU06cXnuv4	ZBP1	Z-DNA binding protein 1	1.92963	9.71401	10.7045	6.3553e-14	1.52975e-11	21.5739
6KSl0.TRkk7kpegiQI	WARS	tryptophanyl-tRNA synthetase	1.92404	10.3375	8.22822	1.67899e-10	2.00889e-08	13.7937
cl2ge4RVTfYfSLffUI	IRF7	interferon regulatory factor 7	1.92228	9.06225	14.3024	2.67053e-18	1.68892e-15	31.4526
WguiinKqUS_efTwTIo	PARP14	poly (ADP-ribose) polymerase family, member 14	1.92191	9.6067	9.78501	1.08815e-12	2.07193e-10	18.7721
utE_0gSunnu65TYtXk	PARP12	poly (ADP-ribose) polymerase family, member 12	1.91967	9.32181	11.7199	3.1301e-15	1.06592e-12	24.5373
6X_RJNfoqj2Qukle_M	PARP9	poly (ADP-ribose) polymerase family, member 9	1.90671	9.5569	17.3642	1.66994e-21	2.68829e-18	38.5841
0Vb3Klul.liHskiAGw	HES4	hairy and enhancer of split 4 (Drosophila)	1.85877	9.06594	7.16222	6.04576e-09	4.31686e-07	10.2536
TSKXWS0XDR3XXfXvU8	IL1RN	interleukin 1 receptor antagonist	1.85073	9.92669	8.19346	1.88447e-10	2.1669e-08	13.6796
iJedp7O.dkZ0Vn0uac	PRIC285	peroxisomal proliferator-activated receptor A interacting complex 285	1.8471	9.72803	9.82787	9.50963e-13	1.87107e-10	18.9051
36hSSRC9Xt9OqYszhU	SERPING1	serpin peptidase inhibitor, clade G (C1 inhibitor), member 1	1.83678	8.78402	10.9903	2.68698e-14	7.43455e-12	22.422
ipfoT8uHvJa1f0jUuk	MX2	myxovirus (influenza virus) resistance 2 (mouse)	1.82977	10.4189	10.3629	1.80293e-13	3.94152e-11	20.5459
oqeOni_zvHB_leHr7k	TMEM123	transmembrane protein 123	1.82429	10.5124	10.8685	3.87241e-14	1.02347e-11	22.062
Np5CejE6D0kR.3V3x4	SAMD9	sterile alpha motif domain containing 9	1.79945	9.27985	10.7025	6.39267e-14	1.52975e-11	21.5681
T03kDulKfqgQ465ECk	IFIH1	interferon induced with helicase C domain 1	1.79764	8.95382	10.1548	3.42767e-13	7.3129e-11	19.9122
osGi.IlKnjn_u6Ukd4	TAP1	transporter 1, ATP-binding cassette, sub-family B (MDR/TAP)	1.77827	10.5731	14.7724	8.04961e-19	5.4824e-16	32.619
upH6Ifs4COnuXeXt1U	IL1RN	interleukin 1 receptor antagonist	1.73018	10.1097	7.81628	6.63902e-10	6.42632e-08	12.4351
BLXpdZI59P_Ffp5LoI	WARS	tryptophanyl-tRNA synthetase	1.72859	9.65723	7.44318	2.33288e-09	1.94862e-07	11.1937
NX9EfunjuDnhYBOiNU	IFI16	interferon, gamma-inducible protein 16	1.70262	10.1856	12.7181	1.84693e-16	7.60592e-14	27.3146
EUAD7d6Qy8X1SMStVU	OAS2	2'-5'-oligoadenylate synthetase 2, 69/71kDa	1.6667	8.55556	14.1652	3.80838e-18	2.32548e-15	31.107
fcZTqE3D0iggrU7f6o	TNFSF13B	tumor necrosis factor (ligand) superfamily, member 13b	1.6337	11.0984	11.5832	4.65886e-15	1.52776e-12	24.1463
fSUs9G5SQSFx1H6cV4	FAM46A	family with sequence similarity 46, member A	1.62616	9.81659	9.18149	7.43039e-12	1.1966e-09	16.8747
rpB1LSBJIDCblvSrUg	TNFSF13B	tumor necrosis factor (ligand) superfamily, member 13b	1.62009	10.5309	10.7359	5.77769e-14	1.42099e-11	21.6678
fp75V5VfrXlXIxJL8w	IFITM1	interferon induced transmembrane protein 1 (9-27)	1.612	11.7258	12.2007	7.88179e-16	3.03415e-13	25.8918
9Oe3u6BCbZDih3cShU	PLAC8	placenta-specific 8	1.60287	10.3215	10.5158	1.12832e-13	2.66405e-11	21.0081
09kidveWWSQwJ1.lmA	TYMP	thymidine phosphorylase	1.58748	12.242	10.5088	1.15288e-13	2.68621e-11	20.9868
HdefXV5T01eVd1OCfg	OAS1	2'-5'-oligoadenylate synthetase 1, 40/46kDa	1.58691	8.93444	6.25992	1.312e-07	5.58483e-06	7.22029
ZSVvWSocin9p._oSQc	ISG20	interferon stimulated exonuclease gene 20kDa	1.57974	11.4088	8.51605	6.48479e-11	8.83329e-09	14.7339
fr.cFeEaHuTH9XTU54	CEACAM1	carcinoembryonic antigen-related cell adhesion molecule 1 (biliary glycoprotein)	1.5616	9.16631	7.3668	3.02083e-09	2.39878e-07	10.9385
6V5WK54VD2eUAi7Q0g	SPATS2L	spermatogenesis associated, serine-rich 2-like	1.55665	8.47567	11.1204	1.82191e-14	5.121e-12	22.8046
fctt136XSSd9XvfHr4	PHF11	PHD finger protein 11	1.55301	10.0725	12.1366	9.45634e-16	3.4886e-13	25.713
T1aLrJnt164KLP7RHo	TIMM10	translocase of inner mitochondrial membrane 10 homolog (yeast)	1.52382	8.52547	7.24807	4.51743e-09	3.46297e-07	10.5412
o3aWaFalm7iZn_Rdc0	NA	NA	1.52191	10.2725	10.766	5.27511e-14	1.31566e-11	21.7575
N6FHU_U3F50FeGl30Y	SCO2	SCO cytochrome oxidase deficient homolog 2 (yeast)	1.51534	9.1343	15.9265	4.7091e-20	4.38888e-17	35.3695
W2teeilGrlER2tWE44	UBE2L6	ubiquitin-conjugating enzyme E2L 6	1.50309	9.56363	11.2989	1.07333e-14	3.11583e-12	23.3254
cwpXkeAOQnSmWutvuE	PLAC8	placenta-specific 8	1.48127	10.3027	10.4378	1.43268e-13	3.17754e-11	20.7726
lo4foRHV6R4It4Eel4	HERC6	hect domain and RLD 6	1.45714	8.59764	13.8903	7.80653e-18	4.31994e-15	30.4074
lF4JSEqSKbWeEDR1Tg	TMEM140	transmembrane protein 140	1.45138	10.3528	8.32284	1.22702e-10	1.56317e-08	14.1036
0R3_RHfu..nR7RPVJE	PHF11	PHD finger protein 11	1.44093	9.93675	12.3879	4.64483e-16	1.82779e-13	26.4106
TY47U6f7qCMe6I4n1I	TNFAIP6	tumor necrosis factor, alpha-induced protein 6	1.44003	9.38697	6.15274	1.89177e-07	7.51107e-06	6.86029
6h9R5TXVCqVA9.S6cU	CXCL10	chemokine (C-X-C motif) ligand 10	1.43508	8.42375	4.46701	5.3425e-05	0.000771656	1.34664
WeyXq7G.R0L3XHih34	NCOA7	nuclear receptor coactivator 7	1.42297	8.95263	7.44166	2.34488e-09	1.94944e-07	11.1887
Wk6rmu6qk7nl77zq.8	BST2	bone marrow stromal cell antigen 2	1.41221	9.64066	11.7703	2.70516e-15	9.39275e-13	24.6807
EpBIouKLnnsjhBdT3M	SAT1	spermidine/spermine N1-acetyltransferase 1	1.39461	11.9625	13.0431	7.55322e-17	3.42955e-14	28.1901
fcV3S0U75If1e3op0U	SP110	SP110 nuclear body protein	1.35801	10.3272	12.016	1.3343e-15	4.72557e-13	25.375
3TXj7nnrbf3V0iS4SQ	VAMP5	vesicle-associated membrane protein 5 (myobrevin)	1.34427	9.30492	9.29335	5.1875e-12	8.74859e-10	17.2297
Ti7MlU37rB_efeR9M0	LAMP3	lysosomal-associated membrane protein 3	1.3299	8.49499	4.72765	2.2882e-05	0.000392631	2.16869
Eo.0e9wnVbhe64pgKg	SP110	SP110 nuclear body protein	1.3283	10.2336	10.8109	4.60652e-14	1.16532e-11	21.891
rXGgNcHFHpKAeTN968	USP18	ubiquitin specific peptidase 18	1.32521	8.36832	6.99183	1.07921e-08	7.21158e-07	9.68176
9qsESLlfOCi_iNeQoI	NA	NA	1.31061	8.25905	16.0994	3.11631e-20	3.06575e-17	35.7683
Q1T_A_emeelo5P.i.s	MAFB	v-maf musculoaponeurotic fibrosarcoma oncogene homolog B (avian)	1.30642	8.84127	12.8413	1.31394e-16	5.53984e-14	27.6481
QdQghd3XurkPge9Nb0	NT5C3	5'-nucleotidase, cytosolic III	1.30579	9.47943	7.19087	5.4852e-09	3.96459e-07	10.3496
iXpUnp.XtUDSUuzDSU	PLSCR1	phospholipid scramblase 1	1.3038	8.56717	11.6038	4.38737e-15	1.46588e-12	24.2054
op3vv4MBuBuBUpoKhU	PARP10	poly (ADP-ribose) polymerase family, member 10	1.3025	9.32305	8.61162	4.73691e-11	6.71049e-09	15.0443
HlbQueVeXu3q.e_nv8	OTOF	otoferlin	1.30171	8.28324	5.72353	8.16193e-07	2.54457e-05	5.42428
Kh15Vr0FcUn7rB8e0Q	FBXO6	F-box protein 6	1.28712	8.59195	10.8523	4.0657e-14	1.05876e-11	22.014
WRQ4OLXyV7tL8V2OV8	TRIM5	tripartite motif containing 5	1.27721	8.63663	9.9163	7.20662e-13	1.43387e-10	19.1788
ipV3uAE5UmkKUEJ6qM	NA	NA	1.27717	8.44079	8.21678	1.74399e-10	2.05884e-08	13.7561
ir7h1CJIuKCFVCTIdo	ADAR	adenosine deaminase, RNA-specific	1.27703	11.1311	9.44414	3.20329e-12	5.58402e-10	17.7059
TR7dIiv9e52V793Sgk	CECR1	cat eye syndrome chromosome region, candidate 1	1.27475	10.5022	8.62264	4.56868e-11	6.52436e-09	15.08
iqt.idQAMBH1.ioiRE	NA	NA	1.26594	9.47775	8.22219	1.71294e-10	2.03576e-08	13.7739
Qkl1OrSbvUIoBbBfkc	FCGR1B	Fc fragment of IgG, high affinity Ib, receptor (CD64)	1.2593	8.97186	8.83062	2.31477e-11	3.3876e-09	15.7519
0igIDypdd43dnN5q14	CNDP2	CNDP dipeptidase 2 (metallopeptidase M20 family)	1.24375	9.95627	9.94722	6.54197e-13	1.31642e-10	19.2743
igVgS9VeuSoulMrp1w	OAS2	2'-5'-oligoadenylate synthetase 2, 69/71kDa	1.23885	8.30409	9.39471	3.75061e-12	6.38614e-10	17.5501
rfqvqsrIxQOAR.ShfU	PARP9	poly (ADP-ribose) polymerase family, member 9	1.23113	8.77483	9.81179	1.00025e-12	1.92526e-10	18.8552
HUrVUiUN5Vd3Od_B9w	OASL	2'-5'-oligoadenylate synthetase-like	1.21847	8.47477	6.92132	1.3721e-08	8.6467e-07	9.44489
QV59WEUl06DOQQdexU	SHISA5	shisa homolog 5 (Xenopus laevis)	1.20743	10.9578	11.4979	5.97676e-15	1.91849e-12	23.9014
NoYII8YdcmX3lVSFMk	DRAP1	DR1-associated protein 1 (negative cofactor 2 alpha)	1.19935	9.81414	8.98708	1.39222e-11	2.10713e-09	16.2543
T4.6rJDUogrnoirg5Y	PSME2	proteasome (prosome, macropain) activator subunit 2 (PA28 beta)	1.19748	10.325	11.3221	1.00222e-14	2.95788e-12	23.3928
WqenuuGedD9eu59oXw	FFAR2	free fatty acid receptor 2	1.18997	10.921	10.118	3.84286e-13	8.10111e-11	19.7993
QKXwn_hUKgB5OiGT9o	LMO2	LIM domain only 2 (rhombotin-like 1)	1.17363	9.56573	7.22786	4.838e-09	3.59964e-07	10.4736
onYjOL3kArrWTX6V3o	SCARB2	scavenger receptor class B, member 2	1.16351	8.8557	11.45	6.87824e-15	2.13684e-12	23.7632
0_DHz7_krTURH3lVHk	GIMAP4	GTPase, IMAP family member 4	1.15894	11.3651	7.56865	1.52711e-09	1.31912e-07	11.6122
cSj1OhRehCQFQHWCH4	CCL2	chemokine (C-C motif) ligand 2	1.15642	8.16746	5.20052	4.76909e-06	0.000107581	3.69628
BUnS0JZROVEF0Uiog8	FCN1	ficolin (collagen/fibrinogen domain containing) 1	1.14982	12.5601	7.53359	1.71888e-09	1.47043e-07	11.4954
odbdZwAxgDyUpuumJE	XAF1	XIAP associated factor 1	1.14412	8.45468	6.89138	1.5195e-08	9.44114e-07	9.34424
9iDnutZBFSNhB16q3g	LGALS9	lectin, galactoside-binding, soluble, 9	1.13077	9.19559	9.04315	1.16112e-11	1.79841e-09	16.4337
QjpTeSFCCQldBIHg3E	DDX60L	DEAD (Asp-Glu-Ala-Asp) box polypeptide 60-like	1.1298	8.55633	8.76697	2.84881e-11	4.13498e-09	15.5468
xKXCKf3Uoo8n6L3cx0	CEACAM1	carcinoembryonic antigen-related cell adhesion molecule 1 (biliary glycoprotein)	1.12884	8.62738	5.98004	3.4097e-07	1.20517e-05	6.2812
lklI6yJkjlRR4CLh.g	CASP1	caspase 1, apoptosis-related cysteine peptidase (interleukin 1, beta, convertase)	1.12759	9.51152	10.4543	1.36178e-13	3.13174e-11	20.8226
9uj4uUrk1CH9XV9SCk	NUB1	negative regulator of ubiquitin-like proteins 1	1.12421	9.1634	5.70815	8.59934e-07	2.65291e-05	5.37308
9WQr2P9P4klI6yJkjk	CASP1	caspase 1, apoptosis-related cysteine peptidase (interleukin 1, beta, convertase)	1.11474	9.49928	12.0181	1.32607e-15	4.72557e-13	25.3811
Trqpb5K7Hqe0qN.3MU	SLC27A3	solute carrier family 27 (fatty acid transporter), member 3	1.1123	9.2777	6.33898	1.00152e-07	4.51269e-06	7.48604
cenynVkOoAQWipSJ8s	DHX58	DEXH (Asp-Glu-X-His) box polypeptide 58	1.10012	8.28598	6.92705	1.34562e-08	8.54059e-07	9.46411
fIB26Kp7Wd666G8L2g	TYMP	thymidine phosphorylase	1.09824	9.09384	7.8275	6.39386e-10	6.29014e-08	12.4723
THcpENrtDZ3SnUue_0	DDX60	DEAD (Asp-Glu-Ala-Asp) box polypeptide 60	1.07767	8.22717	13.6613	1.42945e-17	7.16214e-15	29.8171
l4OKUNCFIIFHQkjVJU	MLKL	mixed lineage kinase domain-like	1.0768	9.89974	9.18138	7.43314e-12	1.1966e-09	16.8743
6lPl9z1xF.1yqnrVp0	NAGK	N-acetylglucosamine kinase	1.07242	10.1186	9.4398	3.24799e-12	5.58402e-10	17.6922
xl7UnV3VQgEE4OJB9I	GBP2	guanylate binding protein 2, interferon-inducible	1.06946	11.0024	9.55959	2.21873e-12	4.00911e-10	18.0686
ulT0A438W6XlU5861U	DHRS9	dehydrogenase/reductase (SDR family) member 9	1.05821	9.23836	6.70016	2.91704e-08	1.65561e-06	8.70116
iX3qB7qexxL0p66.jk	FGL2	fibrinogen-like 2	1.05681	10.8255	9.60185	1.94037e-12	3.54228e-10	18.201
BuOl._Or.vu37gQtvE	CHMP5	chromatin modifying protein 5	1.05282	8.62953	7.65024	1.16002e-09	1.04272e-07	11.8838
0tbjDbteANdkRHp66I	IRF9	interferon regulatory factor 9	1.04679	10.8437	10.4371	1.43553e-13	3.17754e-11	20.7706
Ko6INenlO6_OUlXUiA	CMPK2	cytidine monophosphate (UMP-CMP) kinase 2, mitochondrial	1.04472	8.17318	8.3556	1.10096e-10	1.42306e-08	14.2107
NpOOkK_yXAnTR.7K64	LYSMD2	LysM, putative peptidoglycan-binding, domain containing 2	1.04452	10.0455	8.13756	2.26937e-10	2.57603e-08	13.4959
fet10n1c1MykSIpJP4	SIGLEC14	sialic acid binding Ig-like lectin 14	1.03987	10.1064	3.1633	0.00280238	0.017455	-2.43084
xhqv9fnXlKPALU4v34	CD68	CD68 molecule	1.03462	11.15	8.08522	2.70135e-10	2.97115e-08	13.3237
BqUICQfiX6nDeniy0s	ELF1	E74-like factor 1 (ets domain transcription factor)	1.03437	10.0791	6.26001	1.31159e-07	5.58483e-06	7.2206
orpKKuCPgCeXPm7zno	GIMAP8	GTPase, IMAP family member 8	1.01986	9.41242	6.76653	2.3259e-08	1.3729e-06	8.92441
Z0g_kkQIAZXdeH7Puk	KPNB1	karyopherin (importin) beta 1	1.0092	10.7367	7.44489	2.31942e-09	1.94655e-07	11.1995
9K1yu4XjFFFf7pJFqc	TOR1B	torsin family 1, member B (torsin B)	1.0092	8.46271	8.41897	8.9301e-11	1.16275e-08	14.4176
BUX_PpYB0uPpEIsr5I	OAS2	2'-5'-oligoadenylate synthetase 2, 69/71kDa	1.00398	8.13139	7.73057	8.85311e-10	8.33888e-08	12.1508
x6CNIVJ18V_3lL7FKk	IFI30	interferon, gamma-inducible protein 30	1.00094	9.62491	7.88986	5.18799e-10	5.27982e-08	12.6788
l1eve9T.iYD6X6gAUY	STX11	syntaxin 11	0.998658	10.038	6.18175	1.71338e-07	6.97482e-06	6.9577
Tv66R568VepXg6JwDQ	ZNFX1	zinc finger, NFX1-type containing 1	0.992547	9.2048	5.92559	4.10478e-07	1.41415e-05	6.09894
0Svv6Xd61N_pPK91JI	ADAR	adenosine deaminase, RNA-specific	0.989439	10.0147	6.57339	4.49693e-08	2.36296e-06	8.2746
6nk4QJbUDVx1VFwIeo	RTP4	receptor (chemosensory) transporter protein 4	0.987196	8.12883	9.77812	1.11202e-12	2.09485e-10	18.7506
xEJ7VZ5GJk3HuR3evQ	PSMB9	proteasome (prosome, macropain) subunit, beta type, 9 (large multifunctional peptidase 2)	0.984574	10.0619	6.1011	2.25634e-07	8.64833e-06	6.68699
QejSIV5d7_FWR4eDAk	GPBAR1	G protein-coupled bile acid receptor 1	0.973343	8.94027	7.10234	7.41023e-09	5.20715e-07	10.0527
B6OUaNKAl6J4JQXViQ	KIAA0319L	KIAA0319-like	0.970169	8.43176	5.81435	5.99436e-07	1.95125e-05	5.72714
Nk5OooPTfS3FJVZ7to	CTSL1	cathepsin L1	0.967624	8.22241	7.66844	1.09106e-09	9.90178e-08	11.9444
xpBLlSp3ju3dGm4C7g	HLA-H	major histocompatibility complex, class I, H (pseudogene)	0.96734	12.7703	6.68764	3.04438e-08	1.71142e-06	8.65904
WbS5faHtz_F5LUlzpc	DYNLT1	dynein, light chain, Tctex-type 1	0.964323	9.32023	6.23319	1.4374e-07	6.04597e-06	7.13047
NJ1q6evdLr7dO3f.e0	NPC2	Niemann-Pick disease, type C2	0.958023	11.7352	9.82012	9.74397e-13	1.89611e-10	18.8811
rXfTkN64kuuSmqJSIA	DDX58	DEAD (Asp-Glu-Ala-Asp) box polypeptide 58	0.955496	8.42307	5.3581	2.80939e-06	7.02665e-05	4.21349
HjkkIKJTeQ1KCA9flI	IFIT1	interferon-induced protein with tetratricopeptide repeats 1	0.951189	8.11475	7.33639	3.3486e-09	2.63542e-07	10.8368
H66G8L2iqWW31UFKJI	TYMP	thymidine phosphorylase	0.949371	8.69895	7.35172	3.17908e-09	2.51318e-07	10.8881
BkH9RXlT.7AHktN_hc	MARCKS	myristoylated alanine-rich protein kinase C substrate	0.94564	10.4575	7.25338	4.43676e-09	3.41592e-07	10.559
ciUoKIeRL.gJElbStY	RBCK1	RanBP-type and C3HC4-type zinc finger containing 1	0.944798	9.53468	6.66842	3.25085e-08	1.81596e-06	8.59436
E3nSlX0nHlH2XxNXng	41521	septin 4	0.941167	8.26177	5.81354	6.01087e-07	1.95139e-05	5.72444
Ewd5xOneHnuqj4Agzk	TDRD7	tudor domain containing 7	0.93967	8.35562	9.53178	2.42361e-12	4.33508e-10	17.9814
xXQSlSoqC7iZfrOHwA	IRF1	interferon regulatory factor 1	0.93528	11.4051	7.74817	8.34463e-10	7.90197e-08	12.2092
HeIKB6eeAIBk15Hl6o	BLVRA	biliverdin reductase A	0.916331	8.50185	10.2614	2.46487e-13	5.32291e-11	20.2375
BVN3lH_Oc.q846pCOk	GCH1	GTP cyclohydrolase 1	0.913849	8.30694	6.74249	2.52469e-08	1.46581e-06	8.84356
6VtKG_KH.YUPQV.lUU	CD14	CD14 molecule	0.912929	12.228	6.0847	2.38621e-07	9.02886e-06	6.63197
3uXkUVR5fX0kX8nk.s	ANXA5	annexin A5	0.911673	9.75185	5.35333	2.85487e-06	7.11027e-05	4.19778
352KZNKVv.xS.M0a30	RHBDF2	rhomboid 5 homolog 2 (Drosophila)	0.907243	9.43011	7.66711	1.09597e-09	9.90178e-08	11.9399
EHVCiHwg6SOi6UO_JE	NT5C3	5'-nucleotidase, cytosolic III	0.905364	8.78422	5.18023	5.10437e-06	0.000113839	3.62993
xeS0eEuVKneq7d0ScM	HLA-F	major histocompatibility complex, class I, F	0.903732	11.6912	5.11529	6.34184e-06	0.000136003	3.41804
TGtKt9_YVpWdSNVEnc	UNC93B1	unc-93 homolog B1 (C. elegans)	0.89937	9.12039	7.5904	1.41916e-09	1.23188e-07	11.6846
lpflJe7n7qBF_xeJ8Q	CSRNP1	cysteine-serine-rich nuclear protein 1	0.897231	9.17766	5.64822	1.05387e-06	3.121e-05	5.17366
irowrh0CgIYdBegdIo	SP110	SP110 nuclear body protein	0.896405	9.25103	5.60441	1.22256e-06	3.5259e-05	5.02812
ijOuV7s1SI5yAHvf50	WDFY1	WD repeat and FYVE domain containing 1	0.892331	8.69932	8.19134	1.89773e-10	2.16807e-08	13.6726
07rojh4JWEaXibUgOs	ANXA2	annexin A2	0.889687	10.649	6.90269	1.46207e-08	9.1485e-07	9.38225
uL6367TOjSKRC5Ip7o	GLRX	glutaredoxin (thioltransferase)	0.88381	9.67527	6.48915	5.99615e-08	2.99098e-06	7.99116
QS50.4jFec2OtnEBSg	MS4A7	membrane-spanning 4-domains, subfamily A, member 7	0.878352	8.74162	6.11616	2.14331e-07	8.30498e-06	6.73752
xVb14TRJJdQRCnUIXI	CD74	CD74 molecule, major histocompatibility complex, class II invariant chain	0.877555	11.1076	5.87508	4.87513e-07	1.63812e-05	5.93003
0PtPXs9FbUhfvRHdE4	CX3CR1	chemokine (C-X3-C motif) receptor 1	0.877056	9.95251	4.59038	3.58243e-05	0.00056239	1.7337
HIf_t7qU.BejlFP86o	ANKRD22	ankyrin repeat domain 22	0.866165	8.34264	5.25083	4.02897e-06	9.37516e-05	3.86102
fpfV7SCqvukAlE8Qnk	GRN	granulin	0.864345	9.41511	7.30278	3.75252e-09	2.93146e-07	10.7244
QhTXPwen0l1UX30lF0	SELL	selectin L	0.862761	11.834	7.06896	8.30096e-09	5.76445e-07	9.94072
f7CVXir4tLe37_e5Rk	ZC3HAV1	zinc finger CCCH-type, antiviral 1	0.861547	9.16953	5.68593	9.27318e-07	2.81663e-05	5.29909
NFtdNMC3eb3pThValQ	HLA-DPA1	major histocompatibility complex, class II, DP alpha 1	0.859328	10.9358	8.2125	1.76895e-10	2.06082e-08	13.7421
3V_qkyHl9foV9QLu6w	C1orf162	chromosome 1 open reading frame 162	0.859255	11.2763	8.44656	8.15312e-11	1.07743e-08	14.5076
K76SYRTVMSnfF33Xio	SP140	SP140 nuclear body protein	0.853889	8.6934	5.52624	1.59293e-06	4.42126e-05	4.76884
il0V5OcojoXt3MSSyM	GALM	galactose mutarotase (aldose 1-epimerase)	0.852873	8.38881	4.35075	7.7622e-05	0.00104527	0.985542
9Z9sVJSRzuxO9euA6Q	NCF1	neutrophil cytosolic factor 1	0.852241	11.8727	3.93817	0.000284274	0.00297795	-0.263042
H96_UohJCQJSShOC_c	PSAP	prosaposin	0.842887	12.2895	6.88944	1.52957e-08	9.47047e-07	9.33773
KpCYUm43RIkQFdLdQU	CEACAM1	carcinoembryonic antigen-related cell adhesion molecule 1 (biliary glycoprotein)	0.823261	8.26263	4.65146	2.93591e-05	0.000482274	1.92672
9cCgqXeeHXFIk1tSdI	GPBAR1	G protein-coupled bile acid receptor 1	0.823116	8.63347	7.37866	2.90198e-09	2.31478e-07	10.9782
NQHgKQwNc7gToXd1ro	DHRS9	dehydrogenase/reductase (SDR family) member 9	0.821276	8.60658	6.13897	1.98281e-07	7.78526e-06	6.81406
oXed_glbkhVEMCDCTo	ANKRD22	ankyrin repeat domain 22	0.818078	8.0994	5.21616	4.52562e-06	0.000103406	3.74746
0SXhieViujBeEehqDU	CD14	CD14 molecule	0.816812	10.3544	4.58487	3.64716e-05	0.000570486	1.71634
3l_kqRDhftgNRe0oZc	CST3	cystatin C	0.814403	12.2018	5.42449	2.24623e-06	5.89767e-05	4.43236
BUE.uXS6zuSSOCIqUg	ZC3HAV1	zinc finger CCCH-type, antiviral 1	0.812973	8.62205	5.21058	4.61097e-06	0.000104413	3.72921
HCnY15iCgut3lSXlF8	GRN	granulin	0.808065	9.91757	5.84731	5.35841e-07	1.77358e-05	5.83723
xIiQHFEFDr4lXtC5S0	FGD2	FYVE, RhoGEF and PH domain containing 2	0.807494	9.37297	6.28163	1.21823e-07	5.30313e-06	7.29325
NE01SK670u0hd8OpS4	DNAJA1	DnaJ (Hsp40) homolog, subfamily A, member 1	0.805572	9.29669	5.30819	3.32303e-06	7.99514e-05	4.0493
xmKeUSKOgO18JkleL4	FCGR1A	Fc fragment of IgG, high affinity Ia, receptor (CD64)	0.80226	8.3549	7.24564	4.55482e-09	3.47659e-07	10.5331
ByBzz4UZddQtUmJW7E	NA	NA	0.797642	8.28864	5.32683	3.12113e-06	7.6233e-05	4.11058
HuWssSMFXTAjnzcF1U	FAM111A	family with sequence similarity 111, member A	0.793448	9.27413	6.20925	1.55986e-07	6.46886e-06	7.05004
3H5erRMnCgiuh_VJ.k	TAP2	transporter 2, ATP-binding cassette, sub-family B (MDR/TAP)	0.793267	8.47589	7.2858	3.97481e-09	3.0871e-07	10.6676
c6BohJPqeHupOKKjCk	RAB24	RAB24, member RAS oncogene family	0.792638	10.1587	8.90982	1.78892e-11	2.68459e-09	16.0066
Kf7KZTSUf8glNJS7vo	ARHGEF3	Rho guanine nucleotide exchange factor (GEF) 3	0.792624	9.30566	7.20544	5.22055e-09	3.85189e-07	10.3984
oOlWe61Xd7V1N7O73s	KIAA0319L	KIAA0319-like	0.789749	8.67743	5.11038	6.44656e-06	0.000137869	3.40206
lqeoAM9DB7CVX.o5QE	PIK3AP1	phosphoinositide-3-kinase adaptor protein 1	0.788858	8.68066	4.86376	1.46214e-05	0.000275086	2.60408
Wnte91N1P31TnsFUp0	PATL1	protein associated with topoisomerase II homolog 1 (yeast)	0.78825	8.93174	8.09595	2.60648e-10	2.88472e-08	13.359
6KD030txSVWe7aMRHY	CTSL1	cathepsin L1	0.787109	8.0746	7.64092	1.19701e-09	1.07054e-07	11.8528
TUv5K5EBzirfs1GwRI	RIN2	Ras and Rab interactor 2	0.786667	8.06861	6.6964	2.9547e-08	1.67163e-06	8.68851
QcTp5rXYs3hZYjXono	HIST2H2AA4	histone cluster 2, H2aa4	0.777891	9.97112	4.07734	0.00018443	0.00212484	0.151953
xYf1Y2UpKL93a4cc2c	HIST2H2AA3	histone cluster 2, H2aa3	0.777821	9.87475	3.91273	0.000307476	0.00316742	-0.338155
xnrgFWCNBGfQHSVfoE	AIM2	absent in melanoma 2	0.775043	8.3236	6.55646	4.76456e-08	2.4815e-06	8.21764
KSbk7vQl8j6Y7bP9dE	TLR7	toll-like receptor 7	0.774348	8.03375	10.4385	1.42963e-13	3.17754e-11	20.7747
E6_UohJCQJSShOC_c8	PSAP	prosaposin	0.770142	12.2928	6.02293	2.94587e-07	1.06303e-05	6.42488
f5OhpkpWUh8KhetFGc	TYMP	thymidine phosphorylase	0.770006	8.53769	7.08944	7.74239e-09	5.39772e-07	10.0095
9ioTS59d9RUPVUZr1M	TNK2	tyrosine kinase, non-receptor, 2	0.769712	9.48287	5.10853	6.48646e-06	0.000138388	3.39604
6nhZEkt6fj.SW00_r0	RAB8A	RAB8A, member RAS oncogene family	0.764312	9.92858	6.58773	4.28207e-08	2.27708e-06	8.32284
Wivj4OlfbjC0nuHtKk	HSPA6	heat shock 70kDa protein 6 (HSP70B')	0.763037	10.5051	5.69047	9.1313e-07	2.78223e-05	5.31421
053WgoPev2bjXl5tbs	BRSK1	BR serine/threonine kinase 1	0.758533	8.51592	6.98535	1.10328e-08	7.34135e-07	9.66
KbzWyP3JOC8l0Y57kA	XRN1	5'-3' exoribonuclease 1	0.75784	8.63577	5.68227	9.38913e-07	2.8421e-05	5.2869
BS79uCu_iKp7t6uKjo	ATF5	activating transcription factor 5	0.755371	8.33704	7.68705	1.02483e-09	9.40293e-08	12.0062
KVb81O7U_GlNzvn32k	RNF213	ring finger protein 213	0.746811	8.05521	9.73932	1.25655e-12	2.3422e-10	18.63
fSUyR.vR7Xu0iR4nUU	TXNIP	thioredoxin interacting protein	0.745581	13.3891	5.84219	5.45259e-07	1.79804e-05	5.82013
3pRFCSgkQHVUJ4dNcE	CSF1R	colony stimulating factor 1 receptor	0.745466	9.56186	5.56728	1.38639e-06	3.93434e-05	4.90488
6nGQ7l7rVHDe4ede6A	SP100	SP100 nuclear antigen	0.742128	8.16407	7.87846	5.38991e-10	5.45397e-08	12.6411
WkEvu3I7SKTp6l1N3k	TRIM38	tripartite motif containing 38	0.741505	8.78415	5.77959	6.74627e-07	2.14091e-05	5.61117
6ldXQ9V7BPXgnvVHVI	PLEK	pleckstrin	0.739654	10.8388	6.95302	1.23168e-08	7.96006e-07	9.55139
BSwYp.47vieiuLoWqk	TRAFD1	TRAF-type zinc finger domain containing 1	0.738434	8.52675	4.78285	1.90886e-05	0.000339378	2.34481
3LJ1F4IqOgXerSgEno	C11orf75	chromosome 11 open reading frame 75	0.738424	8.64584	8.04443	3.09491e-10	3.32149e-08	13.1893
NljpTCmu9ukaueHphw	NA	NA	0.738138	8.3184	6.28942	1.18628e-07	5.21255e-06	7.31941
ltevVv3UXIewF3YqSo	CDKN1A	cyclin-dependent kinase inhibitor 1A (p21, Cip1)	0.737753	8.89403	4.00023	0.000234557	0.00256549	-0.0788136
Hkie59ehuPV.6Ceheg	APOBEC3G	apolipoprotein B mRNA editing enzyme, catalytic polypeptide-like 3G	0.736849	8.73429	5.21441	4.55216e-06	0.000103478	3.74175
3nqSAeSkRP6ujRen1I	ANKFY1	ankyrin repeat and FYVE domain containing 1	0.735027	8.42694	5.45577	2.02116e-06	5.40644e-05	4.5357
i78RqXiRSgUoh8Yh3g	FCER1G	Fc fragment of IgE, high affinity I, receptor for; gamma polypeptide	0.728643	11.1889	4.28908	9.45109e-05	0.00122698	0.795541
TkkCRFEkX_MF3dTXqU	SLC25A28	solute carrier family 25, member 28	0.725282	9.31818	4.24619	0.000108318	0.00136519	0.664064
BXu.k13vXPeV_d7tN0	GNS	glucosamine (N-acetyl)-6-sulfatase	0.723458	10.522	6.51757	5.44145e-08	2.75306e-06	8.08677
3nq_5PCpS.H7eXf4UU	ADAP2	ArfGAP with dual PH domains 2	0.716688	8.35496	9.98342	5.84234e-13	1.18915e-10	19.386
30dxWiL9Wfr4ET6XSg	ANXA2	annexin A2	0.713659	8.43912	8.55677	5.67191e-11	7.90852e-09	14.8662
f0gM68T6BE4sV0.d0w	OAS1	2'-5'-oligoadenylate synthetase 1, 40/46kDa	0.713515	7.86594	4.57582	3.75602e-05	0.000581904	1.68784
lv1.83dCUUnlJRRiUk	CYBB	cytochrome b-245, beta polypeptide	0.711827	8.85268	9.46862	2.96291e-12	5.24672e-10	17.7829
954L.6Un8v4odfjCfk	FYB	FYN binding protein	0.711355	10.6441	6.43477	7.22018e-08	3.52218e-06	7.80821
ZXjugJKr963HpyJwoI	SLC7A7	solute carrier family 7 (amino acid transporter light chain, y+L system), member 7	0.710898	9.88158	6.22355	1.4855e-07	6.23349e-06	7.09809
HiCg3odVNVUUowC14U	C19orf66	chromosome 19 open reading frame 66	0.705339	8.2717	6.37725	8.78793e-08	4.08443e-06	7.61473
EnOL_5f54oRyBen5dU	MS4A6A	membrane-spanning 4-domains, subfamily A, member 6A	0.699994	9.51689	4.87877	1.39143e-05	0.000266373	2.65232
rfgpce01ECdf.xqTVM	SP110	SP110 nuclear body protein	0.695322	8.72185	4.57279	3.79324e-05	0.000586131	1.67828
HFqE1p4606I1kOfOe4	PSME1	proteasome (prosome, macropain) activator subunit 1 (PA28 alpha)	0.694152	11.7112	8.10052	2.56719e-10	2.8591e-08	13.374
l6lSv4qIK_SJH1Rd3g	FGR	Gardner-Rasheed feline sarcoma viral (v-fgr) oncogene homolog	0.693084	11.508	6.58446	4.33012e-08	2.29574e-06	8.31184
KeO7d0SfgCXiEnt_4o	HLA-B	major histocompatibility complex, class I, B	0.69095	13.1731	6.64001	3.58191e-08	1.96983e-06	8.49878
BUEfb8dYNKAVKVBpK4	MNDA	myeloid cell nuclear differentiation antigen	0.688149	11.2723	5.16723	5.33119e-06	0.000118006	3.58748
oCkSogqMFcRUhVKehM	CD74	CD74 molecule, major histocompatibility complex, class II invariant chain	0.687162	11.0734	4.98974	9.63368e-06	0.000194812	3.01035
NSKe6JirLKJ.1SLnuE	MOBKL2C	MOB1, Mps One Binder kinase activator-like 2C (yeast)	0.687047	8.72829	5.94386	3.85715e-07	1.33926e-05	6.16006
oVKi52KZNKVv.xS.M0	RHBDF2	rhomboid 5 homolog 2 (Drosophila)	0.687013	8.71514	6.29498	1.16396e-07	5.15287e-06	7.3381
KCBFeWFAiFPiSiCaLg	TMSB10	thymosin beta 10	0.685488	12.6296	6.94788	1.25344e-08	8.07126e-07	9.53411
ct0mK7AvvZZug7i7v4	ADM	adrenomedullin	0.684571	10.3516	4.88072	1.38248e-05	0.000265233	2.6586
ceSnuwk78Xvp_f7u3s	DPYSL2	dihydropyrimidinase-like 2	0.682729	9.39282	6.50387	5.70209e-08	2.86854e-06	8.04069
fQUKE7FMBwIUiX17RU	GBP1P1	guanylate binding protein 1, interferon-inducible pseudogene 1	0.677473	8.00519	5.71179	8.49366e-07	2.62488e-05	5.3852
0SnH9bU7F5ALapCG7U	NCF1C	neutrophil cytosolic factor 1C pseudogene	0.670867	11.1001	2.84734	0.0066346	0.0339946	-3.23047
ipWbdgqkXuB0Ap3.SI	HIST2H2AA3	histone cluster 2, H2aa3	0.669501	9.43136	3.53794	0.000953149	0.00761659	-1.41573
f7H6uyh3Lvfq7Pk6nk	ZFAND5	zinc finger, AN1-type domain 5	0.66876	10.091	5.3581	2.80935e-06	7.02665e-05	4.2135
WoTwvS6U7yeraghNTo	ACOT9	acyl-CoA thioesterase 9	0.66722	8.28833	8.2871	1.38121e-10	1.73464e-08	13.9866
xeEedZNee7te9TvWvU	NUCB1	nucleobindin 1	0.660967	11.245	4.27588	9.8565e-05	0.00126845	0.755032
3tH0U0E9eVSOn_49XU	TRIM21	tripartite motif containing 21	0.656615	8.81941	7.71414	9.35578e-10	8.71958e-08	12.0962
cd3jnj_R3noPeXJ7nQ	MS4A6A	membrane-spanning 4-domains, subfamily A, member 6A	0.652027	9.69396	4.2572	0.000104598	0.00132776	0.69775
6dUoDtfd6beflfeLeU	ZFYVE26	zinc finger, FYVE domain containing 26	0.651604	8.3579	4.96885	1.03256e-05	0.000205877	2.94277
lJ3ghEkVJfdkUlCXwc	MOV10	Mov10, Moloney leukemia virus 10, homolog (mouse)	0.650771	8.12579	4.34621	7.87574e-05	0.00105654	0.97152
iMeiqS6uUsu15619eA	LACTB	lactamase, beta	0.64657	8.64915	6.85066	1.74571e-08	1.0526e-06	9.20737
r731U7Xo5R6C5Eefs4	NA	NA	0.644584	7.93324	10.1072	3.97336e-13	8.27767e-11	19.7664
Qcd3lNEKVH.sn1m4uI	LILRA6	leukocyte immunoglobulin-like receptor, subfamily A (with TM domain), member 6	0.643246	9.20788	5.24573	4.09841e-06	9.49931e-05	3.84432
cVF6gF9OXd468eVFfE	TRANK1	tetratricopeptide repeat and ankyrin repeat containing 1	0.642079	8.77077	3.65154	0.000679906	0.0058304	-1.09515
WivoNh9FOqtfSUk1J0	FTSJD2	FtsJ methyltransferase domain containing 2	0.641805	8.06442	6.55084	4.85688e-08	2.52216e-06	8.19874
rnkqtLjonn0q7o6bTA	TRIM5	tripartite motif containing 5	0.639948	8.06574	7.87584	5.43747e-10	5.47084e-08	12.6324
luo2ITsJJNOiv4I5ZM	B2M	beta-2-microglobulin	0.639609	13.3295	4.90736	1.26589e-05	0.000246334	2.74435
6BVx9xJ77TR4tJHRek	RAB24	RAB24, member RAS oncogene family	0.639055	9.63081	7.83833	6.16583e-10	6.13397e-08	12.5082
fhrMp_N7fnz75VeZck	HAVCR2	hepatitis A virus cellular receptor 2	0.6389	8.88355	7.1887	5.52588e-09	3.97774e-07	10.3423
uoJSuX8NR7BdEHULUQ	RNASE2	ribonuclease, RNase A family, 2 (liver, eosinophil-derived neurotoxin)	0.636401	8.65805	3.79878	0.000435891	0.00413614	-0.671703
iukTtSku4o.nszC_Xk	PANK2	pantothenate kinase 2	0.635039	8.85821	8.2417	1.60558e-10	1.96081e-08	13.8378
ZjpTCmu9ukaueHphxo	NA	NA	0.634658	8.12574	6.07569	2.46073e-07	9.2124e-06	6.60174
xqkU.S7AJLXHfURygo	PSMA4	proteasome (prosome, macropain) subunit, alpha type, 4	0.63428	8.62434	5.02294	8.62723e-06	0.000176818	3.11789
HqHNSN_7pOOs_J_qNM	MS4A6A	membrane-spanning 4-domains, subfamily A, member 6A	0.631202	9.66098	3.8698	0.000350855	0.00351808	-0.464399
Tt5huq2hqZcdZqzRSc	HCG4	HLA complex group 4 (non-protein coding)	0.631112	11.4322	3.6731	0.000637356	0.00554108	-1.0337
lreDeRIkI54ui2qn_4	NA	NA	0.624433	11.0408	4.47948	5.13168e-05	0.000746687	1.3856
HuHnp3tF00B6O4VOWU	ARHGAP17	Rho GTPase activating protein 17	0.623127	8.70136	6.63523	3.64087e-08	1.99605e-06	8.48269
Eqx.SxEEVcI.VLrWJI	IL18RAP	interleukin 18 receptor accessory protein	0.621426	9.40014	3.02557	0.00410374	0.0233063	-2.78623
ilNVTfVyESSE3iAn0k	NA	NA	0.620979	9.11627	6.04795	2.70492e-07	9.95817e-06	6.50874
6TTnqoj3SEdjo1FRPQ	APOBEC3G	apolipoprotein B mRNA editing enzyme, catalytic polypeptide-like 3G	0.617749	8.75985	4.49429	4.89188e-05	0.000718884	1.43192
HhSf37RfitV2VbRFvM	MICB	MHC class I polypeptide-related sequence B	0.617418	8.23309	5.94926	3.78682e-07	1.31742e-05	6.17814
uud.vTT6V09Qkfxnt4	ABCA1	ATP-binding cassette, sub-family A (ABC1), member 1	0.615636	8.68372	5.59962	1.24259e-06	3.56626e-05	5.01219
HgCiovEdKeQkuEuVKk	HLA-A	major histocompatibility complex, class I, A	0.615283	11.5723	3.75225	0.000502029	0.00460618	-0.806442
HzqJNpx567t9VBpGis	CD74	CD74 molecule, major histocompatibility complex, class II invariant chain	0.613089	8.44768	6.06601	2.54329e-07	9.50139e-06	6.5693
ZK3XeorfpYdKhcJRvA	PSMB8	proteasome (prosome, macropain) subunit, beta type, 8 (large multifunctional peptidase 7)	0.61092	9.19532	5.08942	6.91364e-06	0.0001454	3.33382
Nql4j95H8BCddcrijk	IFIT5	interferon-induced protein with tetratricopeptide repeats 5	0.608608	7.90958	7.43547	2.39453e-09	1.9722e-07	11.168
uemnSNkU_XGAECV450	LGALS3BP	lectin, galactoside-binding, soluble, 3 binding protein	0.606962	7.84683	8.26625	1.48002e-10	1.84564e-08	13.9183
Bt6KgN6YBfb_Kh47i4	RNF114	ring finger protein 114	0.60659	9.62573	4.93855	1.14169e-05	0.000225889	2.8449
HSldNFdIVdcJL1dPnc	BATF2	basic leucine zipper transcription factor, ATF-like 2	0.606419	7.88866	5.91711	4.22509e-07	1.44996e-05	6.07057
TFeicuigHuSnOiuiwk	PSMB10	proteasome (prosome, macropain) subunit, beta type, 10	0.604109	11.3545	4.76499	2.02429e-05	0.000354562	2.28775
3UUaROzF5E95E7FUgc	LOC100128274	putative p150	0.602159	8.23056	4.20581	0.000123105	0.00151807	0.540772
E6TRKkiWoJjg.oh3uo	TNFRSF1B	tumor necrosis factor receptor superfamily, member 1B	0.601765	10.7075	4.64324	3.01572e-05	0.000492642	1.9007
ZUCXcuxfXXfHTU1S0E	HCP5	HLA complex P5 (non-protein coding)	0.600653	10.3302	4.59475	3.53189e-05	0.000556926	1.74748
QOOmuiuuvsu46NV.K8	APOL3	apolipoprotein L, 3	0.600208	8.36061	9.70354	1.40672e-12	2.59481e-10	18.5185
xntytbWu7SP9dI8juU	EPB41L3	erythrocyte membrane protein band 4.1-like 3	0.599628	7.95401	10.9157	3.36038e-14	9.15472e-12	22.2017
cX4LnsUuenkrPC1C.M	BAZ1A	bromodomain adjacent to zinc finger domain, 1A	0.599259	8.73481	4.2036	0.000123968	0.00152658	0.534045
Tuv1UFvUApz9AoFJUY	SLA	Src-like-adaptor	0.59911	10.1181	5.53272	1.55841e-06	4.34587e-05	4.7903
3Xl44qgHEkXoA4HRUY	SERPINA1	serpin peptidase inhibitor, clade A (alpha-1 antiproteinase, antitrypsin), member 1	0.591786	11.807	5.54684	1.48572e-06	4.18641e-05	4.83709
Niq0l_574oB.U6goUY	C17orf87	chromosome 17 open reading frame 87	0.591404	8.12268	7.92591	4.59828e-10	4.78978e-08	12.7981
xjlJ93dSrny_n_VFXQ	JUP	junction plakoglobin	0.591217	7.86092	4.46857	5.31566e-05	0.000768405	1.35152
c8V5eI9dKIApBeXUl4	COQ10A	coenzyme Q10 homolog A (S. cerevisiae)	0.589015	9.1252	6.07641	2.45465e-07	9.20911e-06	6.60418
r4UKUSJzq7SRSj_CUo	HSH2D	hematopoietic SH2 domain containing	0.584112	8.55286	4.57659	3.74663e-05	0.000581467	1.69026
HdUm8EQDU6ks46Std4	ATF3	activating transcription factor 3	0.583231	7.94866	3.38586	0.00148684	0.0106985	-1.8359
9oI3rP16XA9V_qKEqI	FCGR2B	Fc fragment of IgG, low affinity IIb, receptor (CD32)	0.580618	8.55549	3.29301	0.00194177	0.013104	-2.08709
cenjghL3z_jikk3kXk	CHMP5	chromatin modifying protein 5	0.576857	8.05372	5.7074	8.62147e-07	2.65511e-05	5.37056
9YO4_gT_qJFSKj90uo	SLA	Src-like-adaptor	0.574888	10.0342	5.6117	1.19276e-06	3.46251e-05	5.0523
Z.kCpQP1UB4Gp0oDvU	PSTPIP2	proline-serine-threonine phosphatase interacting protein 2	0.572045	8.30904	5.51304	1.66564e-06	4.59426e-05	4.72513
BqC3iYt1wMd6n8n3Uk	ZC3HAV1	zinc finger CCCH-type, antiviral 1	0.568728	8.32425	3.48223	0.0011229	0.00864913	-1.57086
uR.XnXd7dyREHuDte4	ACTA2	actin, alpha 2, smooth muscle, aorta	0.56678	8.3366	4.14518	0.000149064	0.00177633	0.356605
0Uu3XrB6Bd14qoNeuc	ZFP36	zinc finger protein 36, C3H type, homolog (mouse)	0.565603	10.9762	6.34546	9.7961e-08	4.42524e-06	7.50781
rclcoKUolSyU7pS3FM	GSDMD	gasdermin D	0.565231	9.1121	4.84782	1.54111e-05	0.000284865	2.55291
HlO0WJVPj1SKt8tegI	MYOF	myoferlin	0.564918	7.87473	9.44109	3.23457e-12	5.58402e-10	17.6963
cQn9tLpBR3ykkkHr.o	AKIRIN2	akirin 2	0.560347	9.35683	5.84521	5.3969e-07	1.78299e-05	5.83021
cXifOcArqOHSJ6p60U	TRIM25	tripartite motif containing 25	0.559048	8.7445	5.02741	8.49978e-06	0.00017461	3.1324
HlFF8ErtMjsn_q0rlE	NA	NA	0.553778	7.89276	6.14783	1.92377e-07	7.60405e-06	6.84379
uUdeqoN60V4nuAQL50	NA	NA	0.552002	8.16332	5.8824	4.75515e-07	1.60084e-05	5.9545
WV_hIIelxckhej.314	C9orf91	chromosome 9 open reading frame 91	0.551799	7.98951	5.42132	2.27036e-06	5.94727e-05	4.4219
ilVw_Hg6BV34UC4VSA	NA	NA	0.551551	8.19305	7.70842	9.53769e-10	8.84258e-08	12.0772
6di441O.0mGmwQHqko	MCL1	myeloid cell leukemia sequence 1 (BCL2-related)	0.551	9.25036	5.1467	5.71002e-06	0.000124831	3.52047
inreqMnokfHSunrgOE	ERP29	endoplasmic reticulum protein 29	0.550326	10.6075	4.53909	4.23164e-05	0.000638823	1.57231
fzqLiUkhJUkjXERP9E	LILRB2	leukocyte immunoglobulin-like receptor, subfamily B (with TM and ITIM domains), member 2	0.549712	9.23421	6.1173	2.13501e-07	8.29096e-06	6.74134
cN3p4qOHxe9LHcQ9d4	HSP90AA1	heat shock protein 90kDa alpha (cytosolic), class A member 1	0.546462	8.84542	2.85338	0.00652909	0.0335511	-3.21571
od7TlRDV.cKCHlccyQ	NBN	nibrin	0.546457	8.37005	6.12313	2.09297e-07	8.1635e-06	6.7609
6S5_kXoLK6SO8GV9dU	TPP1	tripeptidyl peptidase I	0.546196	9.19805	5.07542	7.24404e-06	0.000151092	3.28828
r_nlt6Wp3TrH13uB7s	PRKCD	protein kinase C, delta	0.544942	10.2659	5.07357	7.28876e-06	0.000151846	3.28228
uR8UXT_f96KU5DMpqE	HIST2H2BE	histone cluster 2, H2be	0.544535	8.903	3.65345	0.000676036	0.00580283	-1.08972
NE9AkeOyiMRrH6JLSU	DOCK8	dedicator of cytokinesis 8	0.543714	9.31154	4.10883	0.000167102	0.00195574	0.246763
0gLsZQcKhUQJKSKw5I	LGALS8	lectin, galactoside-binding, soluble, 8	0.543713	8.20851	6.36996	9.00962e-08	4.15475e-06	7.5902
K9_EHedf6p6cceSt1I	FCGR1B	Fc fragment of IgG, high affinity Ib, receptor (CD64)	0.543147	8.03067	5.32205	3.17167e-06	7.71484e-05	4.09487
fTneb76.RSfeV0TkSo	SLC20A1	solute carrier family 20 (phosphate transporter), member 1	0.542163	8.93734	6.42624	7.4337e-08	3.59661e-06	7.77951
ECu1ECuSIC6D3ak24k	NA	NA	0.540806	7.94405	8.19892	1.8506e-10	2.14185e-08	13.6975
01Tv.FeVeX48h1yRek	CD86	CD86 molecule	0.540071	8.59572	5.8616	5.10407e-07	1.70212e-05	5.88498
lxIFNR_FwcXVelmd2c	ELF4	E74-like factor 4 (ets domain transcription factor)	0.534338	9.15835	5.15754	5.50692e-06	0.000120988	3.55582
WXuPXrpSzXo9dwjfl0	NSF	N-ethylmaleimide-sensitive factor	0.532933	8.85657	6.10343	2.23852e-07	8.59864e-06	6.69479
HR0Ih8yURBQ3efSHeo	NFIL3	nuclear factor, interleukin 3 regulated	0.532849	8.95554	4.00682	0.000229803	0.00252598	-0.0591771
xU646Ov6AqDvrl.7lE	DUSP3	dual specificity phosphatase 3	0.532137	8.95746	5.6247	1.14132e-06	3.33507e-05	5.09551
BdXlXor7fQnuh96j_Q	DUSP5	dual specificity phosphatase 5	0.532124	8.12532	6.75407	2.42688e-08	1.42302e-06	8.88251
lbhxZeZRduX9.NxJp8	UNC93B1	unc-93 homolog B1 (C. elegans)	0.531326	8.08628	6.53187	5.18212e-08	2.64452e-06	8.13488
B.fZp50I4Fh32oCYBU	CHMP5	chromatin modifying protein 5	0.529592	7.90256	5.03409	8.31318e-06	0.000171174	3.15404
6uXPf6fDiHqFPrjiCk	CD36	CD36 molecule (thrombospondin receptor)	0.527503	8.74538	3.81253	0.000417999	0.00401624	-0.631697
WRTTVLJ5XPQeQS3UoU	CD36	CD36 molecule (thrombospondin receptor)	0.526615	8.58559	4.07357	0.00018662	0.0021445	0.140612
Z0OiVaNUJXk_wlRLKQ	UBA7	ubiquitin-like modifier activating enzyme 7	0.524386	8.98302	3.72214	0.000549882	0.00492779	-0.893193
fr44n_Hmv_gXxd118k	PRR13	proline rich 13	0.524337	12.3001	6.72272	2.70086e-08	1.55282e-06	8.77706
fKALfp6FX9eero5LrU	FGR	Gardner-Rasheed feline sarcoma viral (v-fgr) oncogene homolog	0.523315	10.8451	4.79514	1.83323e-05	0.000328571	2.38411
ZhRH_ofqJ6p4L53sVM	GADD45B	growth arrest and DNA-damage-inducible, beta	0.522255	8.43166	5.62719	1.13173e-06	3.31799e-05	5.10378
uhfkPyDQkriEqILOXk	EVI2A	ecotropic viral integration site 2A	0.51953	8.5219	3.06121	0.0037211	0.021654	-2.69524
iOR_kvDo3nvnou4m6E	C18orf25	chromosome 18 open reading frame 25	0.516852	8.62668	5.17551	5.18563e-06	0.000115361	3.61451
lPneje9fpLodICUE7o	LCP1	lymphocyte cytosolic protein 1 (L-plastin)	0.514669	12.6976	5.98413	3.36244e-07	1.19209e-05	6.29491
65ToiySASSTnRXWH98	USP41	ubiquitin specific peptidase 41	0.514502	7.8822	4.42847	6.0488e-05	0.000852804	1.22655
K57zV5etdEdFQQ1QpU	WAS	Wiskott-Aldrich syndrome (eczema-thrombocytopenia)	0.512002	11.6779	4.25432	0.000105558	0.00133611	0.688942
cCKea4lD8iVAiVYqBc	CDKN1C	cyclin-dependent kinase inhibitor 1C (p57, Kip2)	0.511705	7.88156	5.71878	8.29455e-07	2.57897e-05	5.40847
oLUKIIIpcl4lAiIsak	PSMB8	proteasome (prosome, macropain) subunit, beta type, 8 (large multifunctional peptidase 7)	0.510032	9.16825	5.64109	1.07966e-06	3.18645e-05	5.14995
0epSD9AaXRyn3r45e4	NOD2	nucleotide-binding oligomerization domain containing 2	0.508537	8.39156	3.38623	0.00148523	0.0106912	-1.83488
cZTmn.pM5.o8_tQqks	PANK2	pantothenate kinase 2	0.50847	8.57556	6.09088	2.3364e-07	8.87834e-06	6.65271
uWeCeygmU99Xs3B6p4	SCPEP1	serine carboxypeptidase 1	0.50728	8.97449	5.0939	6.81118e-06	0.000143757	3.34838
r326XQ5XX810399zkg	SLC31A2	solute carrier family 31 (copper transporters), member 2	0.506031	9.17919	5.3105	3.29732e-06	7.94406e-05	4.05689
EUoUKdKji6iI6vMe1c	DEM1	defects in morphology 1 homolog (S. cerevisiae)	0.505832	8.72529	6.30472	1.12588e-07	5.00931e-06	7.37084
6w1bzod7dSiKrc1FXk	BTN3A1	butyrophilin, subfamily 3, member A1	0.503396	8.55951	4.82175	1.67945e-05	0.000304399	2.46929
N6fAOx3X.O63f6pY_o	NA	NA	0.502924	11.8307	6.5354	5.11999e-08	2.62037e-06	8.14676
HHUKlAnQOVFMgYe1OE	CASP4	caspase 4, apoptosis-related cysteine peptidase	0.502851	9.99302	5.6761	9.58763e-07	2.88738e-05	5.26639
3rFaUE0Lh.MnkIDus4	NA	NA	0.502521	8.84682	5.21106	4.60356e-06	0.000104379	3.73078
cZUqab.lwTUpb3vFAg	HIST2H2AC	histone cluster 2, H2ac	0.502517	8.79616	3.35393	0.00163043	0.011474	-1.92275
9e.eSqOM_uL5QIJDEk	WSB1	WD repeat and SOCS box containing 1	0.500438	8.48637	3.86402	0.000357122	0.00356478	-0.481326
6H3H5QTeX56H7Oo_3U	SRBD1	S1 RNA binding domain 1	0.499586	8.02655	9.04134	1.16793e-11	1.79841e-09	16.4279
HohZok1CB6CcLMZ5ro	SP100	SP100 nuclear antigen	0.498204	8.15504	6.43028	7.33176e-08	3.55701e-06	7.79311
KtnaFShHEv3c5jdSJ0	PSMB8	proteasome (prosome, macropain) subunit, beta type, 8 (large multifunctional peptidase 7)	0.497412	9.16682	5.26865	3.79504e-06	8.92464e-05	3.91947
lBLUXe7cU4VX10R4Xs	HLA-E	major histocompatibility complex, class I, E	0.495651	12.6917	4.85744	1.49299e-05	0.000278211	2.58377
BKn_Vf97C3fqNe7IJ4	RAB10	RAB10, member RAS oncogene family	0.493238	9.52938	5.36481	2.74665e-06	6.90876e-05	4.23558
9ogng5BAT4nJRLkl6U	PSMA5	proteasome (prosome, macropain) subunit, alpha type, 5	0.491822	9.37541	9.05981	1.1002e-11	1.7241e-09	16.4869
KsX5EfPHl0vvl6IbCg	SPPL2A	signal peptide peptidase-like 2A	0.490928	8.51872	8.05611	2.97666e-10	3.21407e-08	13.2278
BVFEEdN7QEUJHdJdVk	RBCK1	RanBP-type and C3HC4-type zinc finger containing 1	0.490342	8.47272	4.39144	6.81313e-05	0.000943291	1.11152
fIouv7hCaDUDpPYunU	KYNU	kynureninase	0.48957	8.23284	6.60291	4.0657e-08	2.17509e-06	8.37393
Zle_ESt.XCnkK.Keuk	CCND3	cyclin D3	0.486894	11.3752	3.96892	0.000258485	0.00277073	-0.171937
0CBX4XqmwwI4XoVeVU	ASCL2	achaete-scute complex homolog 2 (Drosophila)	0.483059	8.42466	4.17158	0.000137163	0.0016602	0.436666
ZTFRXx9el33qceUe7k	RRAS	related RAS viral (r-ras) oncogene homolog	0.481171	8.25713	5.0155	8.84329e-06	0.000180204	3.09378
9SBEyJ7g4I1JaX6iXo	CES1	carboxylesterase 1	0.481151	8.00329	4.82466	1.66341e-05	0.00030214	2.47863
Zl2lOS99FCpxSiFN0g	GCH1	GTP cyclohydrolase 1	0.477183	7.82019	4.35637	7.62366e-05	0.00102818	1.00293
0kuM6SCEUiSOSIlP_4	HNRNPA2B1	heterogeneous nuclear ribonucleoprotein A2/B1	0.47666	10.3417	3.62721	0.000731214	0.00613665	-1.16428
xXVB3jQjfDg1eUXUXk	EVI2B	ecotropic viral integration site 2B	0.47325	11.6997	4.88478	1.36408e-05	0.000262555	2.67164
Tv166Elqw5.yedk5_0	RGL1	ral guanine nucleotide dissociation stimulator-like 1	0.47146	7.82339	4.87155	1.42499e-05	0.000270749	2.62912
0VT9Ov9LpB8eFfv.l4	SNTB1	syntrophin, beta 1 (dystrophin-associated protein A1, 59kDa, basic component 1)	0.466608	8.03508	5.08562	7.0019e-06	0.000146631	3.32144
ZPwXFJX3VUMHutzEi0	MYL12A	myosin, light chain 12A, regulatory, non-sarcomeric	0.466276	11.534	3.1237	0.00312992	0.0190683	-2.53405
c7XeqIK5TrfK7e5VKE	MYD88	myeloid differentiation primary response gene (88)	0.463613	9.20672	5.32967	3.09145e-06	7.57169e-05	4.11993
QRV6COgMBeburou8oU	SLC16A3	solute carrier family 16, member 3 (monocarboxylic acid transporter 4)	0.463281	10.4658	4.57974	3.70847e-05	0.000577061	1.70019
rSqD0GF4gK0UKJLqEU	DECR1	2,4-dienoyl CoA reductase 1, mitochondrial	0.463037	9.96449	5.61822	1.16668e-06	3.39794e-05	5.07397
0EAxQt1XfTqALrg1RU	SERPINA1	serpin peptidase inhibitor, clade A (alpha-1 antiproteinase, antitrypsin), member 1	0.460836	11.076	3.67893	0.000626287	0.00545782	-1.01704
KqUCK7yvQKeYIgynHo	TRIM56	tripartite motif containing 56	0.460221	8.54518	5.64973	1.04847e-06	3.11516e-05	5.17869
9LSxaCJeO4qSrqt6B8	PLEKHO1	pleckstrin homology domain containing, family O member 1	0.460041	9.19285	5.64819	1.05396e-06	3.121e-05	5.17357
fgQ1ax7FM0tf7qyysk	SPG11	spastic paraplegia 11 (autosomal recessive)	0.459912	8.65826	7.19819	5.35064e-09	3.89914e-07	10.3741
Zbu1ugUtclm7hLfk94	HK1	hexokinase 1	0.459142	9.91432	3.53384	0.000964736	0.00769183	-1.42717
9XusJBepN8oJLV6IKQ	CTNNA1	catenin (cadherin-associated protein), alpha 1, 102kDa	0.45837	8.9174	4.65913	2.8633e-05	0.000473371	1.95102
ZLhT4A0V03lFF1Tu9I	ATG3	ATG3 autophagy related 3 homolog (S. cerevisiae)	0.457879	8.85402	5.5528	1.45604e-06	4.11611e-05	4.85686
9T7by.FI1uOUfF7u.o	PSMA6	proteasome (prosome, macropain) subunit, alpha type, 6	0.457813	8.84074	3.4936	0.00108606	0.00844244	-1.5393
03kIj3koHq7kRrvslI	EFR3A	EFR3 homolog A (S. cerevisiae)	0.456272	8.66315	3.99135	0.000241115	0.00262103	-0.105254
3tLitW4t.uLX7tNvak	PHF21A	PHD finger protein 21A	0.455551	9.60374	5.40532	2.39619e-06	6.23079e-05	4.36912
EfGAvg_rimpA0XitJI	WSB1	WD repeat and SOCS box containing 1	0.455154	9.07861	4.12027	0.000161209	0.00189807	0.281276
3t7o3njsS5f55zo0A0	TLE4	transducin-like enhancer of split 4 (E(sp1) homolog, Drosophila)	0.454988	8.59698	5.46321	1.97106e-06	5.30448e-05	4.56028
uw5ph2SHf6HQg9f4W0	ANKFY1	ankyrin repeat and FYVE domain containing 1	0.453699	7.97475	6.47123	6.37478e-08	3.14442e-06	7.93085
33KnLHy.RFaieogAF4	H1F0	H1 histone family, member 0	0.45324	8.07744	3.7226	0.000549129	0.00492353	-0.891888
cp60Tegk_9JKPBeOlw	SP140	SP140 nuclear body protein	0.453001	7.84231	5.33208	3.0665e-06	7.53142e-05	4.12785
Bzkii9KFxeipi5ei_c	HLA-F	major histocompatibility complex, class I, F	0.452714	9.61624	3.60061	0.000791534	0.00654365	-1.23955
Z_T7KX6gJ1LH75XJNI	NA	NA	0.452353	7.89909	6.1767	1.74319e-07	7.04758e-06	6.94073
EVeQqyLSuItX64tP7E	LYRM1	LYR motif containing 1	0.449908	8.73607	6.98438	1.10692e-08	7.34135e-07	9.65675
c0fqKhkyCidygRLlLk	STOM	stomatin	0.449616	9.65387	2.78268	0.00786742	0.0386882	-3.38705
QpDl0uP1SSNPa30F9U	GPBP1	GC-rich promoter binding protein 1	0.445441	8.51645	3.93408	0.000287887	0.00300889	-0.275136
ctNSQ4iDXl3shQTUu4	MYOF	myoferlin	0.44522	7.81956	9.23585	6.23871e-12	1.04222e-09	17.0474
0W6nuULuVKju.kCoTc	NA	NA	0.445006	7.81559	4.77844	1.93679e-05	0.000342624	2.33069
WqPEpuLhTlydH1K.BI	DTX3L	deltex 3-like (Drosophila)	0.443705	7.92234	5.60635	1.21458e-06	3.50862e-05	5.03453
uBujoq7tKivqEikiCI	NA	NA	0.443607	7.89994	4.78368	1.90365e-05	0.000339134	2.34746
fTS1QQjpcgNk90XZfk	MTMR11	myotubularin related protein 11	0.440109	8.4799	4.78494	1.89581e-05	0.000338076	2.35148
KeUFSdU8VIS01Ea5Ik	LGALS9B	lectin, galactoside-binding, soluble, 9B	0.439395	7.99634	5.65924	1.0152e-06	3.03669e-05	5.21031
B_01.ieeHlDBPfY3eo	JAK2	Janus kinase 2	0.435086	7.82819	8.22891	1.67516e-10	2.00889e-08	13.7959
lBKei2_5dLOFgRleog	SAMD4A	sterile alpha motif domain containing 4A	0.434563	7.85896	6.17185	1.77232e-07	7.14902e-06	6.92443
E_Ru6wkyn4IrqykrE4	KIAA1598	KIAA1598	0.433779	7.8423	6.16763	1.79801e-07	7.21975e-06	6.91028
ciIjCU2Vf5d4g_nnv0	RALB	v-ral simian leukemia viral oncogene homolog B (ras related; GTP binding protein)	0.432898	10.5377	5.14791	5.68703e-06	0.000124482	3.5244
ubt12tlW7_Z_FO_R78	CSK	c-src tyrosine kinase	0.432223	10.2272	4.37936	7.08247e-05	0.00097222	1.07406
xoM45wqvHqihSb95kI	SQRDL	sulfide quinone reductase-like (yeast)	0.429975	8.20934	5.12381	6.1639e-06	0.000133273	3.44582
x3p9_7sSIQSB2uqAag	ITPRIP	inositol 1,4,5-trisphosphate receptor interacting protein	0.42854	9.47605	4.06534	0.000191482	0.00218763	0.11591
i7XuHlUSIwqlKKj4Ck	ABI3	ABI family, member 3	0.428269	8.20142	5.71429	8.42193e-07	2.61183e-05	5.39352
i4uimBR4lCiesvG_1k	TCN1	transcobalamin I (vitamin B12 binding protein, R binder family)	0.42755	8.02137	3.47835	0.00113574	0.00872147	-1.58161
xeSt1TgpRVOt46k4JM	TCN2	transcobalamin II	0.426605	7.78626	5.90924	4.33987e-07	1.48201e-05	6.04424
6SlFhCB0cepOirlBJM	C1QB	complement component 1, q subcomponent, B chain	0.425955	7.66898	3.68573	0.000613634	0.00536339	-0.997619
3k.6CetJySv96jtqIU	MYLIP	myosin regulatory light chain interacting protein	0.424697	9.49823	3.93394	0.00028801	0.00300889	-0.275544
37Tose4HahXionvoyo	NA	NA	0.423309	8.16274	4.64114	3.0365e-05	0.000494725	1.89404
ZfczqFYPIR54NexJfE	DEGS1	degenerative spermatocyte homolog 1, lipid desaturase (Drosophila)	0.422997	9.17927	4.655	2.9022e-05	0.000478511	1.93793
343VLftfFT1C53lJV4	TRIM26	tripartite motif containing 26	0.420823	8.32508	3.9552	0.000269694	0.0028546	-0.212612
u9BHheK.SJkttrmeSg	H3F3C	H3 histone, family 3C	0.419228	10.7539	3.43764	0.00127925	0.00956629	-1.69404
EXIf4.daSVI70vd_lU	PPP1R11	protein phosphatase 1, regulatory (inhibitor) subunit 11	0.41832	9.74217	4.45493	5.55466e-05	0.000795165	1.30897
0UW.0SogkrcodV5F.k	CD300C	CD300c molecule	0.418107	8.05799	5.01205	8.94535e-06	0.000182074	3.08259
0edV_TAo3czXINUr8o	CARD16	caspase recruitment domain family, member 16	0.417413	7.89067	6.06358	2.56447e-07	9.56036e-06	6.56115
xQkV1dytSoc0SCCSk4	FAM111A	family with sequence similarity 111, member A	0.416807	8.10572	4.93167	1.16801e-05	0.000229813	2.82271
rowuonJSMCeSgMk9Sk	NA	NA	0.416752	7.83795	4.30704	8.92527e-05	0.0011716	0.850768
xvUSnAlSOVFMgYkF_E	CASP5	caspase 5, apoptosis-related cysteine peptidase	0.415906	7.83832	4.77557	1.95516e-05	0.00034484	2.32152
WK6ReUMn_0NElUygbc	CD300A	CD300a molecule	0.415679	9.43705	3.93143	0.000290252	0.00302696	-0.282969
QXFcOUvUn03Ffi0z4o	FPR2	formyl peptide receptor 2	0.413934	9.77325	4.02554	0.000216801	0.00241454	-0.00330184
WSCXl8FLZyOV97UqH4	RIPK2	receptor-interacting serine-threonine kinase 2	0.413893	8.3267	4.92266	1.20339e-05	0.000236248	2.79366
ZVKEnkqyI0.wufui_E	BTN3A3	butyrophilin, subfamily 3, member A3	0.412814	8.19202	6.02992	2.8765e-07	1.04594e-05	6.4483
oQ1KniA2yJLikp6iTo	NCKAP1L	NCK-associated protein 1-like	0.412	8.96633	4.87175	1.42407e-05	0.000270749	2.62975
HSQOXr3gq0ap7QSu9c	FRMD3	FERM domain containing 3	0.409623	7.93724	3.1878	0.0026162	0.0165279	-2.36657
HUO0UfqfB6sP7rcpf8	PI4K2B	phosphatidylinositol 4-kinase type 2 beta	0.408136	7.89722	3.9535	0.000271117	0.00286795	-0.217654
W3nzoL7lfR_vLBRdJQ	EIF4E3	eukaryotic translation initiation factor 4E family member 3	0.407441	9.29475	3.83196	0.000393937	0.00384571	-0.575078
fMKCkQhvdd5W4on1ZI	NADK	NAD kinase	0.406039	8.99253	3.63171	0.000721448	0.00608822	-1.15151
iXftIjXcUSE8MniSiU	B4GALT5	UDP-Gal:betaGlcNAc beta 1,4- galactosyltransferase, polypeptide 5	0.40383	9.73477	3.79863	0.000436083	0.00413614	-0.672125
9V4f795ApF5O7e727I	HLA-A	major histocompatibility complex, class I, A	0.402273	13.7307	4.82628	1.65459e-05	0.000301125	2.4838
0td1cvREqiuMk_f_5A	POTEF	POTE ankyrin domain family, member F	0.402045	12.8104	4.19364	0.000127934	0.00156799	0.503717
xVZRQfH8UXOHsftLOI	ACSL3	acyl-CoA synthetase long-chain family member 3	0.401868	8.01025	4.69591	2.53892e-05	0.000429409	2.06773
iSOGEH1_5Uya6ieX6Q	LAMP2	lysosomal-associated membrane protein 2	0.401333	9.98513	4.63636	3.08423e-05	0.000499685	1.87891
05J7B50ZQDp46op558	C22orf28	chromosome 22 open reading frame 28	0.401134	7.84951	6.41425	7.74446e-08	3.70844e-06	7.73918
9tIudLlBUKj39SIbFY	N4BP2L2	NEDD4 binding protein 2-like 2	0.400856	8.43816	4.21367	0.00012008	0.0014871	0.564736
fnnsEqHJEhEaOLqtP0	CD86	CD86 molecule	0.400551	7.97063	6.29826	1.15098e-07	5.10814e-06	7.34914
ZhcUqEJKwieO4u7uOo	CD1D	CD1d molecule	0.398124	8.49327	4.00887	0.00022834	0.00251614	-0.0530481
6meDRU3r_ici_fXriI	MAD2L1BP	MAD2L1 binding protein	0.397204	8.14584	8.25723	1.52497e-10	1.88841e-08	13.8888
NZT8Vw.CBJqh4V1uWI	CUL1	cullin 1	0.396965	8.10008	11.4928	6.06707e-15	1.91849e-12	23.8866
fs05Kte43JSiSU8Fy4	NA	NA	0.395939	7.85163	6.10519	2.22507e-07	8.56555e-06	6.70072
lKE1EqyK_ru7Gou3ik	TMEM62	transmembrane protein 62	0.395608	7.99353	4.24233	0.000109653	0.00138006	0.652254
BoO4.pLSrHCTq6gdeU	UBIAD1	UbiA prenyltransferase domain containing 1	0.395226	8.15657	7.19996	5.31854e-09	3.89914e-07	10.3801
TRAA0nH_eU19GuEVGs	CD68	CD68 molecule	0.394995	8.13781	4.32267	8.49108e-05	0.00112125	0.898894
rkS_KJSIffA018gW4U	CNIH4	cornichon homolog 4 (Drosophila)	0.394275	8.35643	3.54815	0.000924819	0.00741363	-1.38714
9l1IJQBTl6N1TJ91.k	ITPRIP	inositol 1,4,5-trisphosphate receptor interacting protein	0.394124	9.41241	3.90521	0.000314677	0.00322658	-0.360309
66uL9VXXz3teIUakCc	PFKFB3	6-phosphofructo-2-kinase/fructose-2,6-biphosphatase 3	0.393714	8.97465	2.70807	0.00955184	0.0445702	-3.56458
BQkv9UU1PE1Kqj9faQ	TANK	TRAF family member-associated NFKB activator	0.393446	8.6442	3.68615	0.000612848	0.00536178	-0.996398
HxK5Lp9zv_r454PKi4	NA	NA	0.39232	8.07246	4.89194	1.33215e-05	0.000257451	2.6947
c_5.L5y.seIvhd1e5I	MTSS1	metastasis suppressor 1	0.392242	8.24456	4.52352	4.45058e-05	0.000666759	1.52345
WpjVO7APdPoex9upew	CCRL2	chemokine (C-C motif) receptor-like 2	0.392069	7.80939	4.65664	2.8867e-05	0.0004764	1.94312
KTL3lz7X1eKdT55_uk	SUMO3	SMT3 suppressor of mif two 3 homolog 3 (S. cerevisiae)	0.390965	8.92987	5.83532	5.58162e-07	1.83716e-05	5.79717
ckVlv.vS3FR3SrBDl0	LPAR6	lysophosphatidic acid receptor 6	0.390894	7.90937	4.48365	5.06308e-05	0.00073986	1.39863
cZeO2oSV51QsQMi4Vs	MT1G	metallothionein 1G	0.390693	7.8355	3.96291	0.000263342	0.00280244	-0.189776
c3umqUACgFKLlHOeH0	NEXN	nexilin (F actin binding protein)	0.387073	7.81347	6.83697	1.82913e-08	1.09798e-06	9.16133
TCl_h31eKvl4D19Of0	SH2B3	SH2B adaptor protein 3	0.385971	8.98633	5.04474	8.02354e-06	0.000165595	3.18861
W5VJUF3qBKSdc3kB7s	SLC2A6	solute carrier family 2 (facilitated glucose transporter), member 6	0.383686	8.2973	4.68886	2.59816e-05	0.00043734	2.04533
xjSAJICIi6WjqniqIA	ACOT9	acyl-CoA thioesterase 9	0.383032	7.92217	6.30649	1.11909e-07	4.99167e-06	7.37679
ueklci9Mjof_oVJL.g	UBE2D3	ubiquitin-conjugating enzyme E2D 3	0.382903	9.78322	3.63627	0.000711689	0.00602131	-1.13857
oolS7Qt56DkoLIEg2U	GORASP1	golgi reassembly stacking protein 1, 65kDa	0.379577	8.01558	4.75768	2.07352e-05	0.000362467	2.2644
Nwog6VLXdULURKorjI	ACTB	actin, beta	0.379225	13.6076	4.75395	2.09904e-05	0.000365845	2.25251
lvYRUsVca4gko4vQm0	ERP29	endoplasmic reticulum protein 29	0.378841	8.61896	3.40779	0.00139526	0.0102222	-1.77596
f7lznxro6giLVCo5Kk	AKR1A1	aldo-keto reductase family 1, member A1 (aldehyde reductase)	0.378803	8.70836	6.23362	1.43532e-07	6.04597e-06	7.1319
EiiACaxjl9eF0Wl1UI	PLXNB2	plexin B2	0.377495	8.166	4.63894	3.05833e-05	0.000497308	1.88709
HSVilzFpxFPSCReB1E	NA	NA	0.377124	8.12511	4.47856	5.14694e-05	0.000748292	1.38273
li8BCeepAuFNnSpptc	H2AFJ	H2A histone family, member J	0.376002	8.87529	2.68101	0.0102408	0.0469316	-3.62811
0k9.tSbh87FSAgpd.k	CYSLTR1	cysteinyl leukotriene receptor 1	0.375029	8.05366	7.13953	6.53037e-09	4.64417e-07	10.1775
WQ.ew7Vff3Kd757uDU	TMX1	thioredoxin-related transmembrane protein 1	0.374319	8.24689	3.95579	0.000269206	0.00285367	-0.210876
xpSa5fxoeNu65j8qPc	ZNF200	zinc finger protein 200	0.374195	7.96405	6.27308	1.25436e-07	5.41759e-06	7.2645
Z1USglULSWVnEx0esA	C17orf87	chromosome 17 open reading frame 87	0.373482	7.9366	6.54182	5.00886e-08	2.5784e-06	8.16838
0SXouANerHh.iKLi7k	OBFC2A	oligonucleotide/oligosaccharide-binding fold containing 2A	0.373257	8.95097	4.74801	2.14039e-05	0.000371589	2.23356
uV7ued.rpMIKh6e7z0	SFT2D1	SFT2 domain containing 1	0.372716	9.40293	4.61513	3.30509e-05	0.000526792	1.81183
EuCFC1IHg1wgOSh5Ag	OAS3	2'-5'-oligoadenylate synthetase 3, 100kDa	0.372178	7.64587	4.05934	0.000195109	0.00221904	0.0978937
ul6IoQqDCFHTLinpQk	AFF1	AF4/FMR2 family, member 1	0.372034	8.06959	4.09029	0.000177101	0.00205243	0.190908
foSvRfVEiwquLhUKdA	NA	NA	0.371415	7.92104	3.63098	0.00072302	0.00609388	-1.15358
HSCEir2DVJHltx0eyw	OSCAR	osteoclast associated, immunoglobulin-like receptor	0.37114	8.90333	3.2754	0.00204177	0.0136215	-2.13425
il3dXoTG8kT6T0s_uk	ELMO2	engulfment and cell motility 2	0.371013	8.54023	4.12667	0.000157997	0.00186894	0.300629
BnlSXq3rAoAsS.SpCA	SSB	Sjogren syndrome antigen B (autoantigen La)	0.369603	8.12117	4.66574	2.80215e-05	0.000467237	1.97197
fuspSX4JTZEtyAfuyc	RHOT1	ras homolog gene family, member T1	0.369466	8.58715	5.74675	7.5428e-07	2.38089e-05	5.50167
9zfU9dleVUilKJ3lfg	IFITM2	interferon induced transmembrane protein 2 (1-8D)	0.367125	13.851	3.79376	0.000442594	0.00417998	-0.686268
9gQLd6tG.5dOBHp5C4	PRKAG2	protein kinase, AMP-activated, gamma 2 non-catalytic subunit	0.36585	7.97339	5.11519	6.34395e-06	0.000136003	3.41772
T246aZaKaK97XSWS1c	MAD2L1BP	MAD2L1 binding protein	0.365375	8.11317	7.00699	1.02492e-08	6.9009e-07	9.73268
ElrogpXmo5QnoQpUj0	HSPA6	heat shock 70kDa protein 6 (HSP70B')	0.364622	8.5454	4.0356	0.000210108	0.00235332	0.0267899
HqjN50lDoA3q9BSVeU	RAC2	ras-related C3 botulinum toxin substrate 2 (rho family, small GTP binding protein Rac2)	0.363659	12.5476	4.82443	1.66467e-05	0.00030214	2.47789
iqhFLp9AfXr9OM34hk	BTN2A1	butyrophilin, subfamily 2, member A1	0.363217	8.91465	4.40768	6.46693e-05	0.000904553	1.16192
f3r8rs7L6lO8ftSKCI	DIP2B	DIP2 disco-interacting protein 2 homolog B (Drosophila)	0.362197	8.81653	3.89103	0.000328713	0.00334532	-0.40206
ZOoheueEudPlelux9c	TYROBP	TYRO protein tyrosine kinase binding protein	0.361527	13.0421	4.36344	7.4532e-05	0.00101058	1.02477
WR7XlS50iu6N_7gnR4	NA	NA	0.359842	8.00414	6.37005	9.00661e-08	4.15475e-06	7.59053
fKOS0UHEB6XoLEtNGU	TTC21A	tetratricopeptide repeat domain 21A	0.358401	7.72115	3.2167	0.00241164	0.0155123	-2.29036
uUfkXdRf6RyB14hFH0	PLAGL2	pleiomorphic adenoma gene-like 2	0.357047	8.14189	5.65481	1.03055e-06	3.06706e-05	5.19559
NV.Pl0.fuGX76oqA3s	RNF149	ring finger protein 149	0.35676	11.4316	4.50791	4.68118e-05	0.000693677	1.47454
9kYHoe7kGf.qIOO1W8	LDLR	low density lipoprotein receptor	0.355863	8.04652	6.64112	3.56837e-08	1.9685e-06	8.50251
Z0We_Xll_ZL4du3igE	HK3	hexokinase 3 (white cell)	0.355521	8.85334	4.01995	0.000220605	0.00244767	-0.0199918
xXcolO813tVTItCXLk	MR1	major histocompatibility complex, class I-related	0.355236	7.98698	5.31924	3.20179e-06	7.76675e-05	4.08563
KEcvnH6gwKn.4qqzow	FAM8A1	family with sequence similarity 8, member A1	0.354603	8.41583	3.92279	0.00029809	0.00309412	-0.308479
QZcruSjd.BLJCnje3o	SERPINB1	serpin peptidase inhibitor, clade B (ovalbumin), member 1	0.354423	9.52907	3.4876	0.00110536	0.00854738	-1.55596
opRpn6DXr756Od.5jw	RARRES3	retinoic acid receptor responder (tazarotene induced) 3	0.353705	9.7355	3.81548	0.00041426	0.00399766	-0.623117
QovQuig56f4ldxHnr4	KLHDC8B	kelch domain containing 8B	0.353012	8.06986	3.81411	0.000415994	0.00400349	-0.627105
9STIfB1fCVITe_oXhU	NA	NA	0.352972	10.4072	2.92857	0.00534015	0.0286803	-3.03026
oVLqP09XJuujRUOUgg	HESX1	HESX homeobox 1	0.35226	7.69006	3.19918	0.00253376	0.0161105	-2.33661
NnlE7Sl85wq4sPU65E	TLR4	toll-like receptor 4	0.350103	8.41355	4.62414	3.2095e-05	0.000514178	1.84029
WooPoHIO7h3uqHkyv4	ARL8B	ADP-ribosylation factor-like 8B	0.349833	8.53685	4.68753	2.60951e-05	0.000438616	2.0411
6C96ScAjhZvgpRdfek	ARRB1	arrestin, beta 1	0.349487	8.1075	4.44994	5.64485e-05	0.000804175	1.29339
r_dQ6fDuAJ15Iwuhe0	RAB8B	RAB8B, member RAS oncogene family	0.349487	9.43678	3.07422	0.00358995	0.0211043	-2.66185
ogf9RSSoFUIk1DIJ7k	LMNB1	lamin B1	0.349233	8.06667	6.27951	1.2271e-07	5.31631e-06	7.28611
ER1CPOl2pC5764iHeg	HEXB	hexosaminidase B (beta polypeptide)	0.349102	9.45546	3.19229	0.00258337	0.0163438	-2.35475
oV9YmmXCX_W4k5EeIM	KLF6	Kruppel-like factor 6	0.348276	11.0565	3.96609	0.000260758	0.00278835	-0.180326
cVpQTQuH8yeQgO6zug	NA	NA	0.3482	8.4288	3.77114	0.00047409	0.00440397	-0.751847
QT2uE93VOEVIKpIIFE	NA	NA	0.347878	8.8252	4.85267	1.51669e-05	0.000281526	2.56845
cXhBQH5fxVNXIPrnfo	MXD1	MAX dimerization protein 1	0.347807	10.8671	3.70319	0.000582225	0.0051582	-0.947615
Nt9PX86l_enqn8Egdo	TMEM60	transmembrane protein 60	0.347459	8.28448	6.28413	1.20788e-07	5.28129e-06	7.30165
Kvvgu6L7B3m6HOhLQQ	CALM2	calmodulin 2 (phosphorylase kinase, delta)	0.34635	10.9999	3.3165	0.00181556	0.0124902	-2.02393
6VOA0UNCl1vfcCPLU0	LGALS8	lectin, galactoside-binding, soluble, 8	0.346288	8.06312	5.89791	4.51068e-07	1.53311e-05	6.00633
0XlXNHLk57pSEjhF.4	PLIN2	perilipin 2	0.345867	8.32475	5.10664	6.52769e-06	0.000138766	3.38986
og2g3eqvqFSQqR8EBU	C3AR1	complement component 3a receptor 1	0.345397	7.83878	5.35034	2.88372e-06	7.16197e-05	4.18795
Q1mTUfvktQtdy5BlMk	TOR1AIP1	torsin A interacting protein 1	0.343617	9.27025	4.04938	0.000201273	0.0022745	0.0680279
3XSSesN_d5_EE3i5JY	LYN	v-yes-1 Yamaguchi sarcoma viral related oncogene homolog	0.342644	11.5109	2.83371	0.00687844	0.0348607	-3.26367
WxOHSTF565Ingj.oq0	CD38	CD38 molecule	0.340842	7.81581	4.79088	1.85916e-05	0.000332209	2.37046
x6gOLnSojonyqK6ufU	PSMB9	proteasome (prosome, macropain) subunit, beta type, 9 (large multifunctional peptidase 2)	0.339756	7.92736	5.72911	8.0086e-07	2.50559e-05	5.44288
u7unt6ujQIAyoeX6eU	RAB24	RAB24, member RAS oncogene family	0.339447	8.34052	3.83762	0.000387181	0.00379635	-0.558556
odF3XHR8CVl4SAUaUQ	IL1B	interleukin 1, beta	0.33939	8.99174	3.39413	0.00145166	0.0105063	-1.81333
WB7qFX0j1eKzp_tHdI	ASPRV1	aspartic peptidase, retroviral-like 1	0.338499	7.90985	4.69227	2.56932e-05	0.000433309	2.05617
6hUhVEJToh0oVSCk6A	LILRB4	leukocyte immunoglobulin-like receptor, subfamily B (with TM and ITIM domains), member 4	0.337022	7.79645	8.31697	1.25109e-10	1.58246e-08	14.0844
r8oqKOwMlkQKrUEnf4	BTK	Bruton agammaglobulinemia tyrosine kinase	0.335892	8.77403	4.70324	2.47876e-05	0.00042165	2.09101
ZlI600y0a67a757V70	ICAM2	intercellular adhesion molecule 2	0.335783	9.47308	3.97147	0.000256448	0.00275223	-0.164354
rXdBESQk7V5dU4N8U4	MS4A7	membrane-spanning 4-domains, subfamily A, member 7	0.33473	8.24693	3.30428	0.0018802	0.0128056	-2.05682
r15KzrSBUuF16I9a3Q	LILRA5	leukocyte immunoglobulin-like receptor, subfamily A (with TM domain), member 5	0.333044	8.94927	3.12138	0.00315018	0.0191366	-2.54007
xU3nwV_nUUwpHqHaP0	GSTK1	glutathione S-transferase kappa 1	0.331975	10.0337	4.02584	0.0002166	0.00241454	-0.00241156
HV7LUuueV77kB51.90	RAB31	RAB31, member RAS oncogene family	0.330252	10.1895	3.46872	0.00116823	0.00890969	-1.60827
E5w5yFLPwqcN0RdfJ4	LHFPL2	lipoma HMGIC fusion partner-like 2	0.330087	7.97776	4.11325	0.0001648	0.00193392	0.260096
ESGzW6XfijNCgeIlbk	NUP205	nucleoporin 205kDa	0.329054	8.05871	6.08131	2.41394e-07	9.1143e-06	6.62062
ike2dzggSeqZez7Xug	SMS	spermine synthase	0.326477	8.79788	4.85772	1.49159e-05	0.000278211	2.58468
TwlKEILkDl3_CQ9Kco	NHLRC3	NHL repeat containing 3	0.325776	7.79583	7.95277	4.20322e-10	4.43039e-08	12.8868
N5ieS0l9G3pdLVbtLk	OSBPL5	oxysterol binding protein-like 5	0.325558	7.75648	5.54224	1.50901e-06	4.2193e-05	4.82186
3idlziQukCldAwlXXo	CLIC1	chloride intracellular channel 1	0.325151	10.8271	3.01121	0.00426808	0.0240392	-2.82268
oJC4o.lSL0tenoolEk	SIGLEC5	sialic acid binding Ig-like lectin 5	0.324557	8.20418	2.93957	0.00518415	0.0280223	-3.00284
9Tqgu5Unp6AXpLjFNA	PRDX1	peroxiredoxin 1	0.324496	8.80508	3.23976	0.00225932	0.0147316	-2.22923
ZhAGpmOOV6f0q60geg	TICAM1	toll-like receptor adaptor molecule 1	0.32417	8.11566	6.54243	4.9984e-08	2.5784e-06	8.17044
fp9BC6XLDRd19QXS4U	SH3GLB1	SH3-domain GRB2-like endophilin B1	0.323764	9.3581	4.73794	2.21224e-05	0.00038219	2.20148
Z0hYgkq4iPcGHo55yw	SIPA1L2	signal-induced proliferation-associated 1 like 2	0.323497	8.1639	2.71241	0.00944539	0.0442133	-3.55434
KTonQjt_7e7pyOl3n4	RAB3GAP1	RAB3 GTPase activating protein subunit 1 (catalytic)	0.322613	8.25438	4.82843	1.64292e-05	0.000299617	2.49068
HHQq60nQ5xEiRof_j0	IL10RB	interleukin 10 receptor, beta	0.322601	10.2414	3.0004	0.00439582	0.0246109	-2.85005
NVQhcKv83XVfgzq6d4	P2RX7	purinergic receptor P2X, ligand-gated ion channel, 7	0.322405	7.94279	7.23269	4.75935e-09	3.57113e-07	10.4897
NmhkRKIAl8SOdOoKu4	NA	NA	0.321644	10.0253	3.73497	0.000528986	0.00478655	-0.856288
xFt6e5xguAECrV0KVY	APOBEC3F	apolipoprotein B mRNA editing enzyme, catalytic polypeptide-like 3F	0.320532	8.11592	3.55114	0.000916669	0.00735495	-1.37875
Eh6Qr9cidx8SBJXil4	GSTO1	glutathione S-transferase omega 1	0.320334	9.66333	5.36596	2.73599e-06	6.89175e-05	4.23938
BeXOhvt.V8Tl5cR8FI	ATP8B4	ATPase, class I, type 8B, member 4	0.318882	7.95184	6.4365	7.17759e-08	3.51107e-06	7.81403
EujpL.ey.6oe6yd_j4	C4orf34	chromosome 4 open reading frame 34	0.318661	9.00221	4.14842	0.000147549	0.00176183	0.36643
rX6h1rVZl5j_v2.9.4	NTNG2	netrin G2	0.318547	7.70451	6.02393	2.93583e-07	1.06303e-05	6.42823
HVpqp3XpC0oK.e_cMw	ADCY7	adenylate cyclase 7	0.318348	8.19097	4.96461	1.04719e-05	0.000208122	2.92906
W1J56DXFNUopKRJSog	LGALS9	lectin, galactoside-binding, soluble, 9	0.317936	7.71224	7.76794	7.80845e-10	7.43398e-08	12.2748
QjR7X5fXr393a_vlKk	MTF1	metal-regulatory transcription factor 1	0.317309	8.27085	4.54189	4.19331e-05	0.000634659	1.58113
fuxTCUEFnh1KPkwlV4	ASH2L	ash2 (absent, small, or homeotic)-like (Drosophila)	0.316993	8.4985	5.72757	8.05063e-07	2.51429e-05	5.43775
WnVdKd59uFbhU4VEuc	OGFR	opioid growth factor receptor	0.316804	8.50085	3.0554	0.00378104	0.0218976	-2.7101
oV3gR9T7zlFSAXHovE	ITM2B	integral membrane protein 2B	0.316239	12.6914	2.83493	0.00685623	0.034788	-3.2607
0N_dK6StSaAuN5NVAI	AKR1A1	aldo-keto reductase family 1, member A1 (aldehyde reductase)	0.316106	8.49244	4.76929	1.99589e-05	0.000350279	2.30148
rg3LXqQfRNbXXt0qek	SERTAD1	SERTA domain containing 1	0.315139	8.45916	6.14159	1.96518e-07	7.73321e-06	6.82284
9iUjWS66IvcO_Hv5KU	CEPT1	choline/ethanolamine phosphotransferase 1	0.314486	8.39295	4.54413	4.16298e-05	0.000631431	1.58816
HhIZKavz.oqsfuk.14	ADPRHL2	ADP-ribosylhydrolase like 2	0.313733	8.30759	3.33042	0.0017445	0.0121172	-1.98638
luwnu1y9_BL85Lnn_U	PCMT1	protein-L-isoaspartate (D-aspartate) O-methyltransferase	0.313383	8.85444	3.2932	0.00194072	0.0131019	-2.08658
BgprkrXTrndXT3ee3c	EMP3	epithelial membrane protein 3	0.3113	11.0068	3.05673	0.00376726	0.021858	-2.70671
xZHfxp9rpwp15_eR3w	HIST1H4H	histone cluster 1, H4h	0.30979	7.90493	4.54779	4.11392e-05	0.000625315	1.59964
irgieSOWIJSQESpUeg	RNF114	ring finger protein 114	0.309553	8.29474	3.3565	0.00161842	0.0114088	-1.91579
6t_KM6glyIBkJIej6g	MEFV	Mediterranean fever	0.307327	8.3258	3.66884	0.000645551	0.00559267	-1.04585
HVIERN4hKFMPPslUUI	USPL1	ubiquitin specific peptidase like 1	0.306969	7.94295	4.19253	0.000128386	0.00157115	0.500323
iE26a5beJ7Jq6f79S8	OSBPL5	oxysterol binding protein-like 5	0.306475	7.86205	5.02181	8.65968e-06	0.000177074	3.11423
TQnk7XhXf4PC6Huk4Q	SNX2	sorting nexin 2	0.305844	8.43164	3.69628	0.000594468	0.00523723	-0.967422
x6tF3qfWSRXUKaLol8	NA	NA	0.305562	7.82345	5.49073	1.79606e-06	4.92332e-05	4.6513
umiL0YHuVBk7zJSrXE	TNS3	tensin 3	0.305144	7.83439	5.69011	9.14255e-07	2.78223e-05	5.313
Newpugyi_dLo_vc77o	UBE2E1	ubiquitin-conjugating enzyme E2E 1	0.304988	8.91876	3.70135	0.000585464	0.00517852	-0.952896
KCF62234f6QOJaJV_o	IFNGR2	interferon gamma receptor 2 (interferon gamma transducer 1)	0.304154	11.0232	2.92453	0.00539842	0.0289069	-3.04029
ontXUcSAXRIESQKMLk	NA	NA	0.302397	8.07509	5.27515	3.71306e-06	8.77849e-05	3.94082
f5ISLpTs7k5MxHcS54	PSMA3	proteasome (prosome, macropain) subunit, alpha type, 3	0.302333	7.91999	5.09319	6.82715e-06	0.000143923	3.3461
fV6AnVYQXUeU8VHKQs	NA	NA	0.301686	7.84682	3.91893	0.000301655	0.00312193	-0.319861
HTg6PerojlXhX4QNzY	APOL6	apolipoprotein L, 6	0.301666	7.65841	4.99894	9.34359e-06	0.000189744	3.04014
i5OVK7e3eniv_3P8S4	PHACTR2	phosphatase and actin regulator 2	0.300211	7.9817	3.64138	0.000700898	0.00595562	-1.12405
EUn0lKhANV1QFHdRJ8	CREG1	cellular repressor of E1A-stimulated genes 1	0.299031	8.51964	3.11464	0.00320972	0.0193853	-2.55754
KlXDy46UezT1KcXOr0	HEATR5B	HEAT repeat containing 5B	0.298086	8.04124	7.62112	1.27954e-09	1.12169e-07	11.7869
9SeHSqLEN15QsMgUBU	AZI2	5-azacytidine induced 2	0.298071	7.82001	6.39517	8.26604e-08	3.88263e-06	7.67501
fpUqtyTULTWXegwVT0	NLRC5	NLR family, CARD domain containing 5	0.296682	7.94655	5.27098	3.76543e-06	8.8668e-05	3.92713
Nb_wOsga6ce4uqJIFk	TBK1	TANK-binding kinase 1	0.29608	8.11605	4.41945	6.22698e-05	0.000874509	1.19848
Wh7h1xxeUl99fneZ6g	SLC26A8	solute carrier family 26, member 8	0.29597	7.90637	4.43082	6.00321e-05	0.000847051	1.23386
KR6j9JJC_ggoesr1XU	FKBP15	FK506 binding protein 15, 133kDa	0.295613	8.01723	5.98691	3.33076e-07	1.18436e-05	6.30421
9XtThfqRKgveu0yM1Y	IDH1	isocitrate dehydrogenase 1 (NADP+), soluble	0.295395	8.25637	6.02266	2.94856e-07	1.06303e-05	6.42398
3Uqb_h1LHQhKdMmeAk	BRD7	bromodomain containing 7	0.295382	8.0914	7.00311	1.03856e-08	6.96623e-07	9.71964
reEHuCUV6nEgFEt9Uk	ST3GAL5	ST3 beta-galactoside alpha-2,3-sialyltransferase 5	0.29484	8.13783	3.86769	0.000353131	0.0035349	-0.470582
3qAi4AhCCpkB7hIdFk	ARHGAP25	Rho GTPase activating protein 25	0.294618	7.73226	4.32094	8.53795e-05	0.0011266	0.893581
HI7XSGoK.iCrSOspqU	CCDC97	coiled-coil domain containing 97	0.293435	8.39099	4.4836	5.06387e-05	0.00073986	1.39848
Tpa0Q1JHSEiUKQzXfk	STX3	syntaxin 3	0.292902	8.91488	3.06509	0.00368151	0.0214755	-2.68529
3zdEkR0kVX3eVPVSXc	IRF2	interferon regulatory factor 2	0.292444	8.15925	2.81842	0.00716187	0.0359067	-3.3008
oU3qAMVTT05x5QXqiU	CX3CR1	chemokine (C-X3-C motif) receptor 1	0.292029	8.04337	4.56176	3.93153e-05	0.000602766	1.64358
3HlR305eUB_qQ_OcDo	TICAM2	toll-like receptor adaptor molecule 2	0.291681	7.8534	7.59181	1.4124e-09	1.23188e-07	11.6894
fbh9J9GPthWuH1UueA	MILR1	mast cell immunoglobulin-like receptor 1	0.290814	7.94519	5.21483	4.54581e-06	0.000103467	3.74311
rpFefX_fk1RIc.V01w	YWHAZ	tyrosine 3-monooxygenase/tryptophan 5-monooxygenase activation protein, zeta polypeptide	0.290107	11.2806	4.07511	0.000185724	0.00213697	0.145235
f3uDfp6h9d4uOXirSc	SUSD1	sushi domain containing 1	0.28973	7.93398	6.10546	2.22301e-07	8.56555e-06	6.70163
uUugMWoFQoWiYOKXs0	POLB	polymerase (DNA directed), beta	0.289409	8.32601	4.25829	0.000104236	0.00132411	0.701094
Ki3QtbOwNI3Vd0VdUU	SPI1	spleen focus forming virus (SFFV) proviral integration oncogene spi1	0.287932	10.4635	2.83797	0.00680141	0.034609	-3.25332
Eud7FLnTTV99MUGtXI	PHF3	PHD finger protein 3	0.287915	8.72217	5.18378	5.04401e-06	0.00011292	3.64155
NVJ7oUeXgK.sSOTlEs	ZNF207	zinc finger protein 207	0.287425	8.23276	6.74802	2.47753e-08	1.44665e-06	8.86215
QXrTXDDqOKgv1JI.Sk	CD2AP	CD2-associated protein	0.287098	7.66175	5.64508	1.06515e-06	3.14887e-05	5.16322
uueT7eC8kXfoeDb_3I	XPO1	exportin 1 (CRM1 homolog, yeast)	0.286934	8.40526	3.41937	0.00134909	0.0099665	-1.74421
QeeYeOUoQX91SOwEiI	MT1F	metallothionein 1F	0.286246	8.19295	3.61224	0.000764607	0.00636273	-1.20669
Qr.Yl55Z3pg4V_H3jc	FBXL5	F-box and leucine-rich repeat protein 5	0.283974	9.74565	3.20404	0.00249929	0.0159544	-2.32378
rLu7XeK5_IC7EeSB5U	FEZ2	fasciculation and elongation protein zeta 2 (zygin II)	0.282735	8.43444	3.8975	0.000322239	0.00328888	-0.383029
cSXdQq.0XyQQ6ie6i4	TOR1A	torsin family 1, member A (torsin A)	0.282686	8.35524	4.71317	2.39938e-05	0.000408934	2.12261
Bl1ZGRZkl57lbq1Yuc	SPG21	spastic paraplegia 21 (autosomal recessive, Mast syndrome)	0.282648	8.10749	5.34646	2.92169e-06	7.24611e-05	4.17516
xnL3utKaRQ4gKDkhXU	RFX5	regulatory factor X, 5 (influences HLA class II expression)	0.2812	8.40524	5.95915	3.66135e-07	1.2788e-05	6.21124
o6fgd8qt5LnU3U_ulU	C1orf144	chromosome 1 open reading frame 144	0.28094	8.65479	5.33352	3.05164e-06	7.50703e-05	4.1326
reF_FiFUMuQSHaOstY	DUSP6	dual specificity phosphatase 6	0.280727	8.06195	4.48633	5.01942e-05	0.000735186	1.40701
iiFGSdPjXjklE7iF0E	SIGLEC1	sialic acid binding Ig-like lectin 1, sialoadhesin	0.280709	7.55239	9.23114	6.33378e-12	1.04821e-09	17.0325
0dVAtCQiHL4Ki96pSk	CD53	CD53 molecule	0.280076	9.43418	4.20272	0.000124312	0.00152976	0.531372
lQM06K1ej4ACJd1R10	NA	NA	0.279838	8.39292	2.69734	0.0098199	0.0455211	-3.58984
BX8NUpN76heFXLT68U	NA	NA	0.279309	9.62038	2.80976	0.00732736	0.0364884	-3.32178
NqwsZB8f9RQIHtJJ5c	MTHFD2	methylenetetrahydrofolate dehydrogenase (NADP+ dependent) 2, methenyltetrahydrofolate cyclohydrolase	0.278958	7.74589	7.78685	7.32817e-10	7.01444e-08	12.3376
Tp3nvutucBZ13CjuXc	GBA	glucosidase, beta, acid	0.278618	8.4231	3.72373	0.000547253	0.00491417	-0.888628
6vUivofs8rDAnoXqHY	BRD7	bromodomain containing 7	0.276895	8.10598	6.81225	1.99003e-08	1.18253e-06	9.07819
6kmUJpNRQk0L6IAqBU	TM9SF4	transmembrane 9 superfamily protein member 4	0.276608	8.35532	4.58983	3.58884e-05	0.000562399	1.73197
oFQt91bU9S0Dep0dFU	SRC	v-src sarcoma (Schmidt-Ruppin A-2) viral oncogene homolog (avian)	0.276467	7.75713	6.73264	2.61098e-08	1.51096e-06	8.81043
Q91CSC4mep7.LlKea4	PRDX1	peroxiredoxin 1	0.276335	8.80731	3.42137	0.00134128	0.00994005	-1.73873
90TCtf5.3_7wiofl3s	RCBTB2	regulator of chromosome condensation (RCC1) and BTB (POZ) domain containing protein 2	0.275134	8.53851	3.74631	0.00051115	0.00466088	-0.823603
WnXRqY6e3.fh.s30eU	RNASEL	ribonuclease L (2',5'-oligoisoadenylate synthetase-dependent)	0.274901	8.52372	4.32375	8.46164e-05	0.0011182	0.902246
KU7r4Pkh7qKSruInh0	SP140	SP140 nuclear body protein	0.274536	7.7317	5.2896	3.53717e-06	8.46435e-05	3.98825
Z0k4rokuFK6JLhShl0	MGAT1	mannosyl (alpha-1,3-)-glycoprotein beta-1,2-N-acetylglucosaminyltransferase	0.274058	9.41072	2.73918	0.00881269	0.0422227	-3.49097
E0LNfvhGlOFH9VupTo	HMOX1	heme oxygenase (decycling) 1	0.27366	8.04012	4.77248	1.97507e-05	0.000347659	2.31167
fP15JX0nrpS6B7En6I	GART	phosphoribosylglycinamide formyltransferase, phosphoribosylglycinamide synthetase, phosphoribosylaminoimidazole synthetase	0.273069	8.01689	6.64836	3.48123e-08	1.92642e-06	8.52688
xeSJevQDS0dX0gkhOk	GYG1	glycogenin 1	0.272238	9.18931	2.65762	0.0108731	0.04908	-3.68267
uc0i4Vy6A8aqOgpROQ	PSMA4	proteasome (prosome, macropain) subunit, alpha type, 4	0.271165	7.9894	2.9246	0.00539742	0.0289069	-3.04012
HVQLQkIhy_CoveqUp0	CD53	CD53 molecule	0.270273	9.9626	3.57571	0.000852328	0.00695211	-1.30975
6HInCijJ_J90e5SpSU	NA	NA	0.269319	7.76208	4.11607	0.000163348	0.00192069	0.268607
Wh0iPd.7USEtN0okgI	CLEC7A	C-type lectin domain family 7, member A	0.269199	7.98066	4.01929	0.000221059	0.00245116	-0.0219612
lkbhEJ4XQidRv_n2JA	RHOT1	ras homolog gene family, member T1	0.269194	8.05141	5.78199	6.69147e-07	2.12812e-05	5.61918
H10pNT1DQgOOud5NLo	HTATIP2	HIV-1 Tat interactive protein 2, 30kDa	0.268679	8.65247	4.47786	5.15858e-05	0.000748755	1.38054
Tp4_Q96VB0Fd3_hZD4	ATP6V0E1	ATPase, H+ transporting, lysosomal 9kDa, V0 subunit e1	0.267572	10.0511	3.65129	0.000680411	0.00583191	-1.09586
WSXeo6PHo_8AEnqkWk	CTSC	cathepsin C	0.267399	8.54043	3.87421	0.000346139	0.0034864	-0.45146
WJLHpIFIDlnoJG0B50	SNX20	sorting nexin 20	0.266832	7.8267	5.70161	8.79249e-07	2.70308e-05	5.35129
BBrXyFWe5Xueyff1KU	OSCAR	osteoclast associated, immunoglobulin-like receptor	0.266474	8.51387	3.0444	0.00389718	0.0223917	-2.73824
fIe38XQz8R154fhQgA	CES1	carboxylesterase 1	0.264233	7.61911	5.44912	2.06707e-06	5.49606e-05	4.51371
36UrIoHIAiP__Xv94U	C1GALT1	core 1 synthase, glycoprotein-N-acetylgalactosamine 3-beta-galactosyltransferase, 1	0.263706	7.76264	3.86225	0.000359061	0.00357607	-0.486502
ZqRQrvDpCbkK9AiCgk	HPSE	heparanase	0.263557	7.98149	3.44486	0.00125258	0.00941059	-1.67414
0V.iL1ELrLIuvwbf10	TOR1AIP1	torsin A interacting protein 1	0.263444	8.90409	3.03473	0.00400196	0.0228381	-2.76289
9WQUXkBSBh3IP19VlU	ETV6	ets variant 6	0.262633	8.44129	3.85761	0.000364211	0.00361719	-0.500115
ZqSpvyx7dV.FJAXh9E	C16orf61	chromosome 16 open reading frame 61	0.262151	8.0232	3.4687	0.0011683	0.00890969	-1.60833
Q5Qolv95e0AUTSN354	UGP2	UDP-glucose pyrophosphorylase 2	0.26196	8.81582	4.24087	0.000110163	0.00138353	0.647782
xV6RCA9S07gkB5X_10	FNDC3B	fibronectin type III domain containing 3B	0.261688	8.39386	2.93808	0.00520505	0.0281009	-3.00656
ZumFCGP95fIkKj0V1k	LAG3	lymphocyte-activation gene 3	0.260786	7.75043	4.38233	7.01526e-05	0.000964489	1.08327
ZVAgF_IkgCJNHlJyWU	MRPL44	mitochondrial ribosomal protein L44	0.260633	8.04848	4.25491	0.00010536	0.00133506	0.690749
uKiEKAakSYDXrgiQJI	CIR1	corepressor interacting with RBPJ, 1	0.259986	8.22655	4.29393	9.30604e-05	0.00121081	0.81046
065_uLfr3ArFAQoJQI	KLF4	Kruppel-like factor 4 (gut)	0.259962	7.8234	3.82033	0.00040818	0.00396248	-0.609
3qL.LbKXzjDxVmuu7I	MED28	mediator complex subunit 28	0.259961	8.37633	4.06082	0.000194205	0.00221157	0.102349
Bm3ft9HjHot1vt5_tU	USP42	ubiquitin specific peptidase 42	0.259941	8.07013	4.27522	9.8772e-05	0.00127019	0.753009
Be7EBVUC7V45SQV_Ro	TAPBP	TAP binding protein (tapasin)	0.259444	7.79792	4.82432	1.66528e-05	0.00030214	2.47753
KjupQtR7XX6aQCVPgg	TAGLN	transgelin	0.259218	7.90774	3.11988	0.00316331	0.019177	-2.54395
BWzioHuyEKxStLffU4	SP100	SP100 nuclear antigen	0.258902	7.77255	4.74247	2.17962e-05	0.000377659	2.21591
0rVTuXvvSV3d_9X94k	SORT1	sortilin 1	0.258612	7.95262	3.49274	0.00108882	0.00845948	-1.5417
BtNCJZ5R611vx4Xp7s	LRRC33	leucine rich repeat containing 33	0.258272	8.18891	4.2475	0.000107871	0.00136149	0.668053
E5JUac65fXh3SzXYWM	PSMB2	proteasome (prosome, macropain) subunit, beta type, 2	0.256855	8.59443	3.97604	0.00025284	0.00271845	-0.150773
N1X_r0.nv_X4oJhjlU	BRI3	brain protein I3	0.256389	10.0485	2.94968	0.0050446	0.0274439	-2.9776
ujVBgklTmuHgSkMSxo	PPM1K	protein phosphatase, Mg2+/Mn2+ dependent, 1K	0.255864	7.79391	3.08043	0.00352892	0.0208391	-2.64589
xuPF55OALk6qFe5N7k	NRIP1	nuclear receptor interacting protein 1	0.255629	7.87194	5.0873	6.96258e-06	0.000146082	3.32694
QgiTqkMBSRLd4Ufom0	NFKBIE	nuclear factor of kappa light polypeptide gene enhancer in B-cells inhibitor, epsilon	0.255335	7.81562	4.50868	4.66952e-05	0.000693109	1.47696
u5zuNQFSOFVy5SI_Ro	UBE2D3	ubiquitin-conjugating enzyme E2D 3	0.255313	10.8617	2.99977	0.00440336	0.0246366	-2.85164
3lS.rqV9.Xof7oopFA	CD2BP2	CD2 (cytoplasmic tail) binding protein 2	0.255247	9.07297	3.85983	0.000361734	0.00359662	-0.493591
x5EAUeUjBSKpeoKiCA	GCH1	GTP cyclohydrolase 1	0.254192	7.63177	4.30876	8.87639e-05	0.00116691	0.856067
K_uqerFDnkrQSc56yk	IL15	interleukin 15	0.252859	7.75823	6.02852	2.8902e-07	1.04876e-05	6.44363
ZrnC3jvf1ODT7rr4jo	RNASEL	ribonuclease L (2',5'-oligoisoadenylate synthetase-dependent)	0.252855	8.36388	3.44147	0.00126504	0.00948546	-1.68349
WnO4ouDi6X3jneHfd4	FNDC3B	fibronectin type III domain containing 3B	0.252342	8.42982	3.12668	0.00310405	0.0189409	-2.52631
NZeuuCgaDZBAeHagLo	41521	septin 4	0.252025	7.65996	4.60728	3.39076e-05	0.000538991	1.78701
i6R6e1TOs1KJRQ7e_I	TRIM6	tripartite motif containing 6	0.251841	7.56803	6.16074	1.8408e-07	7.37488e-06	6.88714
cgblN7AkdIKSU1cjvo	RASGRP3	RAS guanyl releasing protein 3 (calcium and DAG-regulated)	0.251028	7.71491	3.1172	0.00318697	0.0192874	-2.5509
QonlKjn8So.CNEW1Tk	SNRPB2	small nuclear ribonucleoprotein polypeptide B	0.250639	8.43912	3.49876	0.00106973	0.00834119	-1.52497
3WVCS7lckigDkE3ZCY	DERA	deoxyribose-phosphate aldolase (putative)	0.250248	8.31973	4.48097	5.107e-05	0.000743707	1.39027
ZUj8k65UD6VSQkGX3g	NA	NA	0.25021	7.69398	4.13147	0.000155631	0.00184465	0.315137
QV1F_hEoZ7r94lKxDg	SERPINA1	serpin peptidase inhibitor, clade A (alpha-1 antiproteinase, antitrypsin), member 1	0.250207	7.99207	3.75556	0.000497018	0.00456967	-0.79688
fhXuiA9vvVHgOh4ewY	SLC22A4	solute carrier family 22 (organic cation/ergothioneine transporter), member 4	0.24983	8.50651	2.66249	0.0107386	0.0486838	-3.67134
uaEuOnfoDq6OkSHMpE	ASGR2	asialoglycoprotein receptor 2	0.249086	7.89374	2.83738	0.00681196	0.0346229	-3.25474
xoigxw81PX.pXkk7Tk	TUBA1B	tubulin, alpha 1b	0.248758	11.0843	2.90328	0.00571539	0.0302385	-3.09299
KOeNdWen1ISF6h_ktM	ATOX1	ATX1 antioxidant protein 1 homolog (yeast)	0.248309	8.28187	3.45913	0.00120146	0.00910372	-1.63477
WESUj90JLdB1LV03RU	M6PR	mannose-6-phosphate receptor (cation dependent)	0.248232	8.91274	3.54236	0.000940793	0.00753145	-1.40337
KUV_oun66J6oQr.vxw	SPTLC2	serine palmitoyltransferase, long chain base subunit 2	0.24812	7.72298	3.55812	0.000897945	0.00722764	-1.35919
3XURH31AKCRW_LX.io	NSF	N-ethylmaleimide-sensitive factor	0.247981	7.8502	5.36019	2.78965e-06	6.99703e-05	4.22039
cVe.FY7OgMClf9deAA	TIAF1	TGFB1-induced anti-apoptotic factor 1	0.247791	8.48085	2.69116	0.00997713	0.0460451	-3.60433
rF.0Kez6_i7IeB5eq0	FCGR2B	Fc fragment of IgG, low affinity IIb, receptor (CD32)	0.247182	7.68788	3.82111	0.000407206	0.00395546	-0.606719
cXfiegZeAeiXRgqeec	SLC3A2	solute carrier family 3 (activators of dibasic and neutral amino acid transport), member 2	0.247141	7.99097	4.60393	3.42789e-05	0.000544405	1.77645
9tFX0HokoaCvt7H6io	ACP2	acid phosphatase 2, lysosomal	0.24691	7.66234	7.30236	3.75786e-09	2.93146e-07	10.723
KgkxUqCCe_WjhVziAk	GSTO1	glutathione S-transferase omega 1	0.246681	9.06255	3.38214	0.00150291	0.0107922	-1.84603
6hygVInCze4pDd5gZ4	PARP11	poly (ADP-ribose) polymerase family, member 11	0.246626	7.61817	6.93925	1.29081e-08	8.2519e-07	9.50513
KBSq.yd73edU19nRSc	CREB3L2	cAMP responsive element binding protein 3-like 2	0.246211	8.10393	6.36418	9.18925e-08	4.20474e-06	7.57077
ioNfvl44c7r1X4eghE	N4BP2L2	NEDD4 binding protein 2-like 2	0.246197	7.91203	3.77754	0.00046496	0.0043402	-0.7333
6V3lEvNCDq0ohZ596k	ALPK1	alpha-kinase 1	0.245881	8.33513	4.05842	0.00019567	0.00222395	0.0951357
KJLSlERT51QDofd5CU	APOBEC3F	apolipoprotein B mRNA editing enzyme, catalytic polypeptide-like 3F	0.245869	7.68245	4.05344	0.000198735	0.00225013	0.0802107
TohFHxQiSqSLUnwN3U	NA	NA	0.245119	7.91684	5.08885	6.92672e-06	0.000145502	3.33197
BX_f27hRO.3sUtHqgI	UBP1	upstream binding protein 1 (LBP-1a)	0.244896	8.26215	6.90133	1.46885e-08	9.15859e-07	9.37768
Q8SSUhjTknHE0f36AY	HIF1A	hypoxia inducible factor 1, alpha subunit (basic helix-loop-helix transcription factor)	0.243967	7.90768	3.72407	0.000546693	0.00491164	-0.887654
HbeRIp6zv5TSJGmAD4	PSMC2	proteasome (prosome, macropain) 26S subunit, ATPase, 2	0.243777	8.11326	3.83899	0.000385569	0.00378683	-0.554568
9edYSSVSgMag69KhQs	SCAF11	SR-related CTD-associated factor 11	0.242824	8.14952	5.4803	1.8605e-06	5.06857e-05	4.61679
TknXgre75HtFLdCc5c	GLIPR2	GLI pathogenesis-related 2	0.24273	11.1102	2.96299	0.00486612	0.0266724	-2.94425
uYd0KR7s5XkL6e3OJM	TMCO1	transmembrane and coiled-coil domains 1	0.242707	8.28591	3.48264	0.00112156	0.00864255	-1.56972
f_JnRXubpfucFPJHk0	RP2	retinitis pigmentosa 2 (X-linked recessive)	0.242482	7.88185	3.79531	0.000440519	0.00416704	-0.681783
ijU0QJgtOoiUR_Ougw	POMP	proteasome maturation protein	0.242439	9.16916	3.07933	0.00353967	0.0208795	-2.64872
oglcQ0rkk9IhbYCaPU	DIAPH2	diaphanous homolog 2 (Drosophila)	0.241967	7.75371	9.19381	7.14151e-12	1.17094e-09	16.9139
xd0iAsn_4TtOBU7_Q0	NA	NA	0.240771	7.86271	3.60111	0.000790358	0.00654308	-1.23813
3UVCs0lkvuWU0yXF04	STYXL1	serine/threonine/tyrosine interacting-like 1	0.240531	8.09646	4.025	0.000217163	0.00241553	-0.00490123
WXSeYr_hfin6OKg.9U	NA	NA	0.240442	7.88469	2.65028	0.0110786	0.0497667	-3.69971
EirpVXgvs0t46Be_os	41334	membrane-associated ring finger (C3HC4) 1	0.240327	7.77856	5.97205	3.50385e-07	1.22864e-05	6.25443
KVUKHfn10JX3p9vzrc	TMX2	thioredoxin-related transmembrane protein 2	0.239253	8.26148	4.83645	1.60002e-05	0.000293001	2.51642
BX7XiiR.UpMvEn1Uew	PROSC	proline synthetase co-transcribed homolog (bacterial)	0.239218	8.49858	4.76145	2.04801e-05	0.000358361	2.27643
6qPyUIkSH6PX3tXVRc	IER5	immediate early response 5	0.238738	8.05653	3.8359	0.000389221	0.00381213	-0.563575
BTvcUX6UfSQvT14qdU	GBA	glucosidase, beta, acid	0.238513	8.12698	3.46275	0.00118883	0.00905064	-1.62479
KnodpZaV5WxgSmSqpg	NA	NA	0.237546	7.77634	4.68401	2.63969e-05	0.000442648	2.02994
ui8QkUqjncTQqORfS0	AQP9	aquaporin 9	0.237048	11.8814	2.6905	0.00999426	0.0461121	-3.60589
f97jknkIqpUXQRdfwk	MOBKL1B	MOB1, Mps One Binder kinase activator-like 1B (yeast)	0.237016	8.03007	5.51768	1.63972e-06	4.52983e-05	4.74049
E1xFxd3ep9z9hZjjuk	FTL	ferritin, light polypeptide	0.235945	13.8857	3.28949	0.00196138	0.0132062	-2.09653
EqXV_FUsYLc5Xg1Uiw	SASH3	SAM and SH3 domain containing 3	0.235655	9.044	2.95808	0.00493129	0.0269599	-2.95657
Bu43rRzuHl.Gv3dTuc	PTPRE	protein tyrosine phosphatase, receptor type, E	0.235533	9.66631	3.69556	0.000595749	0.00524591	-0.969471
EdY3fYvBsoQeenOPuU	MORC3	MORC family CW-type zinc finger 3	0.234453	7.74789	4.20172	0.000124708	0.0015325	0.52831
fn9CiKQYgL6SgLhlNU	SAT2	spermidine/spermine N1-acetyltransferase family member 2	0.233714	8.19604	3.15393	0.0028768	0.0178387	-2.45533
E6dPsoDXuX1X_JELvk	KPNA4	karyopherin alpha 4 (importin alpha 3)	0.233437	8.49485	4.47627	5.18514e-05	0.000751994	1.37557
BRIrveF5B_HqCVerBE	CPEB3	cytoplasmic polyadenylation element binding protein 3	0.23292	7.89811	3.8387	0.000385905	0.00378803	-0.555401
uqF1y9Ruc09xwekVwo	FUT4	fucosyltransferase 4 (alpha (1,3) fucosyltransferase, myeloid-specific)	0.231546	7.67894	4.9698	1.02929e-05	0.000205487	2.94586
WU.npH.DqThLv3g3i0	ZNF684	zinc finger protein 684	0.230135	7.58707	4.91327	1.24139e-05	0.000242599	2.76338
KJw_09TFdEO1dgvouU	ITFG1	integrin alpha FG-GAP repeat containing 1	0.229655	8.12011	5.54192	1.51064e-06	4.2193e-05	4.8208
NOZsFtdX_tKnMVBehc	TFG	TRK-fused gene	0.22964	8.28686	3.68709	0.000611124	0.00535202	-0.993718
QnqHdJK1BN6A0XxxEI	CARD17	caspase recruitment domain family, member 17	0.229169	7.64931	4.37555	7.16943e-05	0.0009796	1.06227
Zmy0lfmdLsgFRt7Cto	PTTG1IP	pituitary tumor-transforming 1 interacting protein	0.228929	9.82318	3.64405	0.000695323	0.0059253	-1.11646
EuVBB.H5cQa9EB6BKU	PNPT1	polyribonucleotide nucleotidyltransferase 1	0.228631	7.65521	4.63088	3.1398e-05	0.000505877	1.86159
9U4FV8CUISXV3_JILU	MYOF	myoferlin	0.228167	7.59299	6.4097	7.86589e-08	3.7343e-06	7.72386
B0iRUYDid0C9ApOUgw	RBM43	RNA binding motif protein 43	0.228084	7.80017	2.94068	0.00516865	0.0279631	-3.00007
ul141JapUj1HivItT8	REC8	REC8 homolog (yeast)	0.227384	8.02358	4.16439	0.000140311	0.00168449	0.414828
fX6z0pBFHoHQpT4rnk	NDUFA9	NADH dehydrogenase (ubiquinone) 1 alpha subcomplex, 9, 39kDa	0.226591	7.97603	3.52711	0.000984082	0.00782142	-1.44598
rnPD9TX8kp6lcpKCek	PLEKHO2	pleckstrin homology domain containing, family O member 2	0.225559	8.67604	3.00903	0.00429355	0.0241442	-2.8282
9AochlCXo5QolXrtE4	MDK	midkine (neurite growth-promoting factor 2)	0.225432	7.68928	4.01646	0.000223014	0.00246821	-0.0304099
WSJ6T_RARpBHq6TULc	C15orf24	chromosome 15 open reading frame 24	0.225222	9.10774	3.89697	0.00032276	0.00329231	-0.384577
3t4p_pnl6liaI2q.l0	RAB24	RAB24, member RAS oncogene family	0.2243	7.7314	6.47555	6.28121e-08	3.10692e-06	7.94541
6h7gFtL2gp68gTuokE	IL18R1	interleukin 18 receptor 1	0.223895	7.96589	3.39103	0.00146474	0.0105738	-1.82179
cTUoHil4FP_T9VddSU	TTYH3	tweety homolog 3 (Drosophila)	0.22189	7.86834	5.17235	5.24063e-06	0.000116292	3.60421
xue1DIBEElEDkpRI5A	41334	membrane-associated ring finger (C3HC4) 1	0.221644	7.79308	3.69916	0.000589329	0.00519994	-0.959159
oJ1.tndOntI161dRHo	AGPAT3	1-acylglycerol-3-phosphate O-acyltransferase 3	0.221225	7.66078	6.1504	1.90693e-07	7.55433e-06	6.85244
uARXu1OoyLX9Z_S_5U	TPMT	thiopurine S-methyltransferase	0.220932	7.96331	5.12192	6.20289e-06	0.000133789	3.43966
NoPSfuESMTVHJ_4roE	CEPT1	choline/ethanolamine phosphotransferase 1	0.220504	7.97411	4.76517	2.02309e-05	0.000354562	2.28832
HULo956KPNoJq5IG0c	CECR1	cat eye syndrome chromosome region, candidate 1	0.220063	7.65065	6.22044	1.50138e-07	6.28521e-06	7.08763
09X4mEul0cT5Upy34E	SMCHD1	structural maintenance of chromosomes flexible hinge domain containing 1	0.219898	7.99909	3.53474	0.000962181	0.00768019	-1.42466
EfHceP1VSHuP.gfX5c	SLFN11	schlafen family member 11	0.219738	8.31861	3.50592	0.00104744	0.00820713	-1.50505
WSbTRUt7dJ6LfV0SKE	CNTRL	centriolin	0.219081	7.85882	4.22561	0.000115625	0.00144087	0.601158
TVXshU9wO6l4rQ6iO4	XRN1	5'-3' exoribonuclease 1	0.218739	7.6011	3.93639	0.000285839	0.00299151	-0.268298
HkokooPnrl9PTgCTlQ	KYNU	kynureninase	0.217998	7.87697	5.12102	6.22153e-06	0.000134028	3.43673
Nu9fPuCJhEHl55f1Ek	USP3	ubiquitin specific peptidase 3	0.217908	9.24954	3.92142	0.000299349	0.00310356	-0.312516
Z4ifVeKHeQBiuu3r_g	NA	NA	0.217866	7.73616	3.58275	0.000834716	0.00684629	-1.28995
i0NA17XLu5Lt9pXuhE	EHD4	EH-domain containing 4	0.217812	7.97123	3.40618	0.00140179	0.0102449	-1.78037
oXUkKUoEd90UgBThSk	EDEM2	ER degradation enhancer, mannosidase alpha-like 2	0.217563	8.27518	4.51861	4.52179e-05	0.000675142	1.50808
9up90pKKE36S56fpTw	SIL1	SIL1 homolog, endoplasmic reticulum chaperone (S. cerevisiae)	0.217532	7.73149	4.86287	1.46646e-05	0.000275086	2.60121
0pfE0sntIqAh7ksPtE	PSMA6	proteasome (prosome, macropain) subunit, alpha type, 6	0.217524	8.08672	2.97191	0.00474988	0.0262027	-2.92186
ZgrvgnZukSpMKiigsI	EXOC1	exocyst complex component 1	0.217244	7.84364	5.43367	2.17769e-06	5.77282e-05	4.46269
QdEiSOA5ehSS7ifauQ	NA	NA	0.217202	7.71072	2.84348	0.00670279	0.0342351	-3.23988
rXUIvGLwoIuUVfilXg	RIPK3	receptor-interacting serine-threonine kinase 3	0.216252	7.86429	6.35414	9.50979e-08	4.31874e-06	7.53701
QqQF0qheQ0ghuCkj.Q	MS4A14	membrane-spanning 4-domains, subfamily A, member 14	0.216146	7.66884	5.71236	8.47732e-07	2.62441e-05	5.38709
TIHALnqe7q2qe7oSKo	ARAP1	ArfGAP with RhoGAP domain, ankyrin repeat and PH domain 1	0.215864	8.12511	2.74787	0.00861572	0.0415262	-3.47029
EJ5JEtOlSm2WVaViKs	PHF11	PHD finger protein 11	0.215552	7.77396	4.71822	2.36004e-05	0.000403393	2.13867
lCd16F_h0SeFVLqS9Q	LILRA5	leukocyte immunoglobulin-like receptor, subfamily A (with TM domain), member 5	0.214957	8.23574	2.92216	0.00543294	0.0290566	-3.04618
c5_Sze.d9cp0L64VCU	NA	NA	0.214923	7.74342	6.00106	3.17393e-07	1.13773e-05	6.3516
feJX9UTtynUO3XsrUU	CDS2	CDP-diacylglycerol synthase (phosphatidate cytidylyltransferase) 2	0.214838	8.09932	2.84676	0.00664472	0.0340158	-3.23187
uiSUjjAkSOVJHgIvH0	CARD17	caspase recruitment domain family, member 17	0.214694	7.60594	4.06404	0.000192265	0.00219512	0.111991
EriFFI_dKgdSglSDgY	NA	NA	0.214656	7.94714	7.11907	7.00061e-09	4.93891e-07	10.1089
Z1C5pHkCIZ9C6ogmmM	NA	NA	0.214641	7.66394	4.04445	0.000204391	0.00230092	0.0532721
0e0o6rfXT7Km8o75.c	ACLY	ATP citrate lyase	0.214272	8.12311	4.30039	9.11647e-05	0.00119228	0.830316
0ko95AO7dFRx4j70lU	MAPRE1	microtubule-associated protein, RP/EB family, member 1	0.213883	9.35952	3.24721	0.00221216	0.0144924	-2.20945
orkgnGUd.HNUUovep0	GPR141	G protein-coupled receptor 141	0.21349	7.73838	3.09511	0.00338851	0.0202237	-2.60806
feETXd.kJ54epEdOUI	UBE2A	ubiquitin-conjugating enzyme E2A	0.213323	8.38252	3.62041	0.000746193	0.0062446	-1.18354
iHsVpOIAVHSXsIVgJI	ZNF200	zinc finger protein 200	0.212739	7.84702	4.93817	1.14312e-05	0.000225918	2.84369
3BS2ubi9ehpFZCFBBM	PML	promyelocytic leukemia	0.211773	7.55866	4.83716	1.59628e-05	0.000292617	2.5187
ZUBAKISAaLhZbg7IZU	PRKAG2	protein kinase, AMP-activated, gamma 2 non-catalytic subunit	0.211533	7.80873	3.90571	0.000314198	0.00322367	-0.35885
WYnirz6nh.PhU03r_k	MMADHC	methylmalonic aciduria (cobalamin deficiency) cblD type, with homocystinuria	0.210784	8.89397	3.76158	0.000488037	0.00449644	-0.779495
KlnOCAuvQSdaeilodA	GNG5	guanine nucleotide binding protein (G protein), gamma 5	0.210335	8.43689	3.35944	0.00160474	0.011353	-1.90779
ljhMe8iFHo8khXrkuE	CBWD5	COBW domain containing 5	0.21028	7.78168	4.04911	0.000201441	0.00227494	0.0672281
QcZ6LXge6sgBGF6f7I	TMEM51	transmembrane protein 51	0.209589	7.68456	3.65264	0.000677678	0.00581411	-1.09203
B1LqutLKIkb0ioIlN0	ATP6V0E1	ATPase, H+ transporting, lysosomal 9kDa, V0 subunit e1	0.208678	10.9484	3.01941	0.00417342	0.023581	-2.80186
Nken96etBzOAX709dY	ZBTB33	zinc finger and BTB domain containing 33	0.206613	8.37341	3.04285	0.00391374	0.022465	-2.74218
lStL4pAAc6v.0rgXVU	EXOSC3	exosome component 3	0.206072	8.32784	4.63021	3.14665e-05	0.000506093	1.85947
91egdDB0.R6d.NiLHI	MS4A4A	membrane-spanning 4-domains, subfamily A, member 4	0.206062	7.52884	4.53456	4.29418e-05	0.000647161	1.5581
K6DSNcJTISnD5UUdUo	THOC7	THO complex 7 homolog (Drosophila)	0.206042	8.6516	3.32954	0.00174892	0.0121307	-1.98876
Bc0rbi1KrcQtWpVUvQ	ODF3B	outer dense fiber of sperm tails 3B	0.205663	7.76042	4.84437	1.55879e-05	0.000287443	2.54181
9KCUpFjIkVJVFXsDoM	ETV7	ets variant 7	0.205142	7.63935	3.56565	0.000878129	0.00711341	-1.33803
KUoHei9NIvOuWD7f64	BIRC2	baculoviral IAP repeat containing 2	0.205081	8.09171	2.78605	0.00779813	0.038427	-3.37894
ffF106fEl6kXSWXR14	NA	NA	0.204829	7.71093	4.63811	3.06661e-05	0.000497779	1.88447
cEhc.nKrnlqj_q0k3o	NAPA	N-ethylmaleimide-sensitive factor attachment protein, alpha	0.204704	7.95635	3.18573	0.00263145	0.0165887	-2.372
3kSJdxekoBC1qMf6SQ	LARP7	La ribonucleoprotein domain family, member 7	0.203711	7.73982	5.37324	2.66974e-06	6.75367e-05	4.26336
rXe5eL3V77dAmsVNdU	KCNMB1	potassium large conductance calcium-activated channel, subfamily M, beta member 1	0.20209	7.68871	6.04127	2.7673e-07	1.01038e-05	6.48633
cRIq0i76Re31q3vRW0	NA	NA	0.201952	7.70421	6.96063	1.20016e-08	7.78474e-07	9.57697
ozocU6JIDbiX2.ntHI	C3orf38	chromosome 3 open reading frame 38	0.201869	7.74799	5.17593	5.17824e-06	0.000115341	3.6159
lVNDNKJeJOLwJO6Ol4	LRRC37B	leucine rich repeat containing 37B	0.201815	8.07604	4.09209	0.000176107	0.00204386	0.196316
WF_ziugieiGlHiZxeQ	RNF31	ring finger protein 31	0.201801	8.18688	3.14741	0.00292973	0.0180955	-2.47236
x65aXRiHVTIIUQiv00	NAIP	NLR family, apoptosis inhibitory protein	0.201304	7.72946	3.41007	0.00138607	0.0101634	-1.76973
Wi9PxCRSSCCpixtBZ4	NA	NA	0.201148	7.64483	4.97344	1.01695e-05	0.000203526	2.9576
c60kdSyYiGkVINI1Sc	PEPD	peptidase D	0.20023	8.24436	3.24927	0.00219925	0.0144291	-2.20396
feGKkd4jJHneqU3jRQ	CNOT4	CCR4-NOT transcription complex, subunit 4	0.200136	8.13937	4.40198	6.58644e-05	0.000919092	1.14422
lhl7hKiAox94EKJdQk	CD274	CD274 molecule	0.200022	7.5806	2.70571	0.00961023	0.0447366	-3.57014
6e5enz9HSTDuRavRU4	PARP3	poly (ADP-ribose) polymerase family, member 3	0.199735	7.7326	6.14504	1.94216e-07	7.65966e-06	6.83443
l_dahjiLP1TnotpiCo	ASPHD2	aspartate beta-hydroxylase domain containing 2	0.199683	7.72083	3.76913	0.00047699	0.00441533	-0.757663
Ni6Cd9NxBWFFog9eqY	ATP1B3	ATPase, Na+/K+ transporting, beta 3 polypeptide	0.19897	7.80337	5.47754	1.87795e-06	5.10824e-05	4.60765
xUU5cfv5_cXl54VF4U	UBQLNL	ubiquilin-like	0.198644	7.60583	5.06203	7.57458e-06	0.000157246	3.24477
ir_h054gFRKAke1Kyg	MFAP1	microfibrillar-associated protein 1	0.19857	7.88371	5.39323	2.4959e-06	6.4334e-05	4.32923
r44yMUgS6efIuKkqD0	C4orf33	chromosome 4 open reading frame 33	0.197654	7.59996	5.4732	1.90567e-06	5.15987e-05	4.5933
HuTfddOp686_i_eoe0	C3orf38	chromosome 3 open reading frame 38	0.196877	7.85043	4.46369	5.39998e-05	0.000777421	1.33629
oGJDIOzrRerulLlZ7k	PHF15	PHD finger protein 15	0.196715	8.3621	2.65288	0.0110053	0.0494999	-3.69367
NZetRodJdXXZaXy.FE	NA	NA	0.196541	7.77385	4.16259	0.000141108	0.00169195	0.409376
9p9edCEWPWcT1FQRFI	RBBP8	retinoblastoma binding protein 8	0.196093	7.58207	5.88464	4.71915e-07	1.59478e-05	5.96196
fod7SAqdHjfdyiet7o	SLFN12	schlafen family member 12	0.194958	7.71493	3.74785	0.000508765	0.00464632	-0.819147
Wh36lF3vHx7HOgnXrg	PROSER1	proline and serine rich 1	0.194846	7.77925	5.37156	2.68486e-06	6.78224e-05	4.25784
NSVUBJUuWEU_9f0R.U	PTPRE	protein tyrosine phosphatase, receptor type, E	0.194455	9.26907	3.13337	0.00304674	0.0186813	-2.50892
0KpKj9199_tenVCp94	GRIPAP1	GRIP1 associated protein 1	0.194447	7.96124	3.11403	0.00321522	0.0194119	-2.55913
le_n.WiSL6IN_4FKeQ	NA	NA	0.194443	8.137	4.08789	0.000178437	0.00206596	0.183688
WVI_nU6AKKBJv1sA_E	TARS	threonyl-tRNA synthetase	0.19421	7.79922	4.90744	1.26557e-05	0.000246334	2.7446
lT2M6FFF0neaF.6l2k	MIA3	melanoma inhibitory activity family, member 3	0.194174	7.62941	3.08789	0.0034569	0.0205212	-2.62668
HrlpdGIdVMghRCK.TU	NAIP	NLR family, apoptosis inhibitory protein	0.193114	7.7207	3.45397	0.00121971	0.00920263	-1.64902
KXukJSQjpXrhJAIB5E	NA	NA	0.19291	7.58763	5.92193	4.15625e-07	1.4291e-05	6.0867
uAH3seV6DOp5VUSeno	KARS	lysyl-tRNA synthetase	0.192703	8.00671	3.55775	0.000898925	0.00723224	-1.36022
9oiqK0d.466V4F0968	ST3GAL5	ST3 beta-galactoside alpha-2,3-sialyltransferase 5	0.190499	7.84399	3.57085	0.000864692	0.00702384	-1.32341
HIOKHmCiBkkJUpproA	NA	NA	0.18896	8.46338	3.40641	0.00140088	0.0102449	-1.77975
oEqyEpSqACkdKkRJPk	CLEC2B	C-type lectin domain family 2, member B	0.188364	7.75514	4.6871	2.61317e-05	0.000438616	2.03974
irujptMAKGiBuF_CCU	TRIM5	tripartite motif containing 5	0.187451	7.64273	5.46134	1.98356e-06	5.33002e-05	4.55409
c_Rx.9Lr361X8UTfq4	MIER1	mesoderm induction early response 1 homolog (Xenopus laevis)	0.187138	8.17848	3.10675	0.00328089	0.0197344	-2.57799
xoT3o8_9ST5EtUcBfs	EXOC1	exocyst complex component 1	0.187057	7.77527	4.72122	2.33697e-05	0.000399837	2.14821
6wCOFm_ClF196eoqkg	ARRB1	arrestin, beta 1	0.186134	8.04631	3.07633	0.00356907	0.0209969	-2.65642
fbXiV885e6yJDkIeAI	VCPIP1	valosin containing protein (p97)/p47 complex interacting protein 1	0.185343	7.96784	3.17209	0.00273417	0.0171315	-2.40781
cC3fXl1Qkngq4cBqZQ	NOD1	nucleotide-binding oligomerization domain containing 1	0.184821	7.63688	3.63142	0.00072207	0.00608877	-1.15233
BcXqo133dQO8lNeCyU	YIPF1	Yip1 domain family, member 1	0.183245	9.01143	4.48157	5.09718e-05	0.000742888	1.39213
ByTqefdRBZiCVp5e.M	SLA	Src-like-adaptor	0.182404	7.9084	2.8328	0.00689508	0.0349153	-3.2659
f0kUU1G5UE_USiJJ74	NSF	N-ethylmaleimide-sensitive factor	0.181596	7.72281	4.39239	6.79236e-05	0.000941151	1.11447
ltFe_XOooroKP6QnQU	FUCA1	fucosidase, alpha-L- 1, tissue	0.181366	8.00716	3.96304	0.000263236	0.00280244	-0.189392
K_CHD6i1N3c_ker2Pk	SLC22A15	solute carrier family 22, member 15	0.181131	7.7273	3.51048	0.00103349	0.0081302	-1.49236
udVFpTiHCnhf0wFRCI	NA	NA	0.180241	7.69216	3.30273	0.00188855	0.0128427	-2.06098
BpPpulnJ3uVOB.ChdM	TFIP11	tuftelin interacting protein 11	0.178955	8.28999	3.25858	0.00214185	0.0141416	-2.17916
BiJI_e9VkOODqRr_lg	DYNC1I2	dynein, cytoplasmic 1, intermediate chain 2	0.178528	8.01395	4.43532	5.91695e-05	0.00083688	1.24786
6R7R.SJ2unRJu15Vr8	GNA15	guanine nucleotide binding protein (G protein), alpha 15 (Gq class)	0.177877	8.10213	2.66017	0.0108023	0.0488602	-3.67673
NVe6qUC.87qSOe60oE	UVRAG	UV radiation resistance associated gene	0.17786	7.85439	5.31311	3.26853e-06	7.88543e-05	4.06547
KuovxRRyF5GoIPnAqI	NA	NA	0.177338	7.78001	4.10801	0.00016753	0.00195946	0.244302
on1f9Xe6S8Y.4fS14g	OSBPL9	oxysterol binding protein-like 9	0.177316	8.16314	3.96927	0.000258206	0.00276941	-0.1709
lvrv31_lf_hw7x7UL0	PTPRO	protein tyrosine phosphatase, receptor type, O	0.176924	7.51942	6.03491	2.82798e-07	1.03041e-05	6.46501
Q6_s4qLzg6Lh6n.16g	NA	NA	0.176489	7.77699	3.80353	0.000429627	0.00409389	-0.65789
rlO6kuCTlDuNDVywCU	RNF135	ring finger protein 135	0.176091	8.1835	4.15749	0.000143393	0.00171683	0.393922
oRR6CRSTB7ihX1Ae6k	ZNF438	zinc finger protein 438	0.175849	7.83804	5.05033	7.87551e-06	0.000163111	3.20677
xIr4tKHieuCA37qz3o	RNF20	ring finger protein 20	0.174345	8.16834	3.77738	0.000465197	0.0043402	-0.733786
6Uup3plzp3u7nn.hEA	MAPK14	mitogen-activated protein kinase 14	0.172843	7.86414	3.93552	0.000286607	0.00299777	-0.270867
BmIi0nkEoIVDoyMQv4	RABGAP1L	RAB GTPase activating protein 1-like	0.172815	7.80295	3.31168	0.00184079	0.0126197	-2.03691
cfeXR9iSH.vdpnXRjo	DRAM1	DNA-damage regulated autophagy modulator 1	0.17274	7.78392	4.80607	1.76846e-05	0.000318251	2.41908
0xmuhxiF_GaW93oZac	MRPS34	mitochondrial ribosomal protein S34	0.172102	7.73004	5.08156	7.09719e-06	0.000148204	3.30826
ll.uN0XvoORw7.eJV8	CASP4	caspase 4, apoptosis-related cysteine peptidase	0.171944	7.65491	4.50825	4.67603e-05	0.000693493	1.47561
cQKpNoguSee5eO6gSc	MT1E	metallothionein 1E	0.171806	7.79766	3.35853	0.00160898	0.0113694	-1.91028
N5PqFLT9cJxM6U34S4	STK3	serine/threonine kinase 3	0.171087	7.78946	3.50949	0.00103652	0.00814674	-1.49512
3enAQXhAe6UqgWEQV0	NA	NA	0.170289	7.70111	5.29902	3.42706e-06	8.23424e-05	4.01916
T0QuIf47.pVUlAHw60	PCGF5	polycomb group ring finger 5	0.169665	7.62983	3.76002	0.000490352	0.00451542	-0.784007
HVRNhyS8dP591c7VeE	MSL3	male-specific lethal 3 homolog (Drosophila)	0.168006	7.92405	4.44426	5.74906e-05	0.00081705	1.27569
EKZ5KJKMuX_ma9GZI4	PML	promyelocytic leukemia	0.168001	7.59008	4.80018	1.80312e-05	0.00032383	2.40021
lks1Li4IEfh4d_pRd4	PROSER1	proline and serine rich 1	0.167526	7.76481	4.17841	0.00013424	0.0016304	0.457399
xtpJ0Dv6i5CA8pFUow	N4BP2L1	NEDD4 binding protein 2-like 1	0.167167	7.70616	4.869	1.43706e-05	0.000272749	2.62092
N_qS0pP7N.rKkELAE4	C4orf32	chromosome 4 open reading frame 32	0.167155	7.84436	3.66635	0.000650404	0.0056292	-1.05297
6zhu2h0pSegTuSV6Ls	PFKP	phosphofructokinase, platelet	0.166455	7.96084	3.72896	0.000538674	0.0048519	-0.873578
KGSFUR1Oi3oOTqJ5VU	LILRB1	leukocyte immunoglobulin-like receptor, subfamily B (with TM and ITIM domains), member 1	0.165886	7.55334	5.50118	1.73377e-06	4.77475e-05	4.68587
iXe5pXe6OJIJkh8OO4	NA	NA	0.16383	7.68468	4.36068	7.51938e-05	0.00101791	1.01624
KnUpcrlSnOOLef_Cis	SLC9A9	solute carrier family 9 (sodium/hydrogen exchanger), member 9	0.1633	7.59837	6.40041	8.11942e-08	3.8239e-06	7.69263
WXTp3pEuw1KrsjqoHs	BAK1	BCL2-antagonist/killer 1	0.163179	7.71711	3.34308	0.00168217	0.011771	-1.95215
QgqHUvlCvjeASkqJwk	KLHL6	kelch-like 6 (Drosophila)	0.163046	7.80174	4.48935	4.97074e-05	0.000729261	1.41644
QjtHSUzgoCHUu6OJXo	NA	NA	0.162721	7.67019	4.79212	1.85159e-05	0.000331191	2.37442
6wSpE.eFgV3QpIoov4	MTSS1	metastasis suppressor 1	0.162468	7.81818	3.78267	0.000457775	0.00429191	-0.718445
Q6KC9xHZdFBJYRriFE	FZD2	frizzled family receptor 2	0.161907	7.63526	5.14417	5.75857e-06	0.000125428	3.5122
3uIgmeLXuQToC5ICKI	VRK2	vaccinia related kinase 2	0.16171	7.60357	6.19382	1.64423e-07	6.76083e-06	6.99822
9niJ6n9d7hTVpewTN4	GAS6	growth arrest-specific 6	0.161087	7.5705	4.48183	5.09296e-05	0.000742885	1.39293
0xUgV0IS0uoWQIXqXc	MB21D1	Mab-21 domain containing 1	0.160969	7.53603	4.33584	8.14125e-05	0.00108252	0.939507
fIAk8VP_aUL1YYinoU	DENND1A	DENN/MADD domain containing 1A	0.159786	7.67654	3.73083	0.000535639	0.00483933	-0.868195
BjpCEsgkinlRqHsFbQ	IDH1	isocitrate dehydrogenase 1 (NADP+), soluble	0.158912	7.76636	5.01735	8.78904e-06	0.000179304	3.09978
oEeVAX309eUEunldVY	IFITM4P	interferon induced transmembrane protein 4 pseudogene	0.158658	7.62099	2.94744	0.00507524	0.0275513	-2.9832
QukgUT.vV30Ku37O5Y	CSTF3	cleavage stimulation factor, 3' pre-RNA, subunit 3, 77kDa	0.158643	7.75199	3.52822	0.000980864	0.00779934	-1.44288
feh8QDlCquHoL7ozSo	KLF4	Kruppel-like factor 4 (gut)	0.158589	7.72969	3.31752	0.00181026	0.0124586	-2.02118
oenxddunxJepF0ll0c	NA	NA	0.158479	7.68063	3.30484	0.0018772	0.0127901	-2.05532
xmt6AGJw9bljorvjo4	NA	NA	0.15775	7.54747	8.23794	1.62572e-10	1.9718e-08	13.8255
BXpexJ79cXHffsB3nk	KIF5B	kinesin family member 5B	0.157478	7.64596	4.77675	1.94753e-05	0.00034418	2.32532
TrXsYT8et4ojooWnko	RNH1	ribonuclease/angiogenin inhibitor 1	0.157407	7.91632	4.26128	0.000103251	0.00131817	0.71025
ifq.oxXy6jjsDIpycU	PTP4A1	protein tyrosine phosphatase type IVA, member 1	0.157294	7.74122	3.54034	0.000946417	0.00757304	-1.40901
WpIADoapJ9EKQt9Odo	RHEB	Ras homolog enriched in brain	0.156931	8.3952	3.24616	0.00221875	0.0145087	-2.21224
QGSUg18Le7v3u3Qh6k	TUFT1	tuftelin 1	0.156277	7.61744	3.79244	0.000444383	0.00419463	-0.690116
cg3llXU33F3g6UV8hU	C2	complement component 2	0.155904	7.59595	4.8917	1.3332e-05	0.000257451	2.69393
ZxJFVFxHooS0gJTtS0	TRMT1L	TRM1 tRNA methyltransferase 1-like	0.155137	7.72989	6.40992	7.85991e-08	3.7343e-06	7.72461
lpT7JXe7vRJTXseT1k	MCTP1	multiple C2 domains, transmembrane 1	0.154853	7.61502	3.78406	0.00045585	0.00428006	-0.714425
i7ShmgJKikKVmcKULY	HIST2H2AB	histone cluster 2, H2ab	0.154788	7.5915	3.09709	0.00336993	0.0201491	-2.60294
WVH3uJJyTf3fedelR4	KIAA0226	KIAA0226	0.153587	7.69446	2.65774	0.0108696	0.0490767	-3.68238
WJ57JeCCEI.ehCdJUo	PLXDC2	plexin domain containing 2	0.153201	8.23918	2.9938	0.00447561	0.0249384	-2.86673
6eeluSCdOuRB6gxfpA	ATP6V1H	ATPase, H+ transporting, lysosomal 50/57kDa, V1 subunit H	0.152779	7.878	4.47152	5.2652e-05	0.000761733	1.36075
QnkTUTsXRvXPc7rjXo	GPR141	G protein-coupled receptor 141	0.15272	7.63978	3.33454	0.00172395	0.0119951	-1.97524
oTptYXmtAHRi3qognQ	CALML4	calmodulin-like 4	0.152429	7.75439	3.98653	0.000244747	0.00265076	-0.119592
EH7f0_R9HeXv9CqLCM	MTMR4	myotubularin related protein 4	0.152122	8.14215	3.34217	0.00168659	0.0117908	-1.95462
H11VOByAFHx1SD0rbk	TIMM23	translocase of inner mitochondrial membrane 23 homolog (yeast)	0.152106	8.57375	2.90628	0.00566961	0.0300459	-3.08556
cVSIwKeU.6q3sfOl4A	TNFAIP3	tumor necrosis factor, alpha-induced protein 3	0.152066	7.95652	3.0358	0.00399029	0.0227918	-2.76018
x7nUphFP5TXn3BkBV4	SLC6A12	solute carrier family 6 (neurotransmitter transporter, betaine/GABA), member 12	0.152048	7.66602	5.11341	6.38175e-06	0.000136648	3.41192
cSOTuOOzqsxZfKk.qQ	C1GALT1C1	C1GALT1-specific chaperone 1	0.151507	7.96716	3.35317	0.00163402	0.0114868	-1.92482
BX5KiBrh.s_07uafXs	CASZ1	castor zinc finger 1	0.151222	7.69864	4.69174	2.57377e-05	0.000433648	2.05449
ZIEQQlXHj96v3lGlEo	ATL3	atlastin GTPase 3	0.150571	7.67599	5.2934	3.49238e-06	8.37983e-05	4.0007
38sFEL0KtAqFd7l998	ACSL5	acyl-CoA synthetase long-chain family member 5	0.15047	7.7058	5.26413	3.85299e-06	9.02497e-05	3.90466
EOuluuU1iD_SJE.lxw	CMAS	cytidine monophosphate N-acetylneuraminic acid synthetase	0.150028	7.74169	3.75263	0.000501453	0.00460328	-0.805348
lKW7SRjoVQEhRXXu34	NA	NA	0.149962	7.78176	3.13337	0.00304672	0.0186813	-2.50891
BlOeInqf13uFNWl7BM	GAS6	growth arrest-specific 6	0.149731	7.66319	4.53987	4.22083e-05	0.000637734	1.57479
iV1NbfroRe7p3Reb.g	RGS12	regulator of G-protein signaling 12	0.149725	7.68786	4.39647	6.70413e-05	0.000934042	1.12711
0SKi9EQosCXh6FPkaM	C2orf47	chromosome 2 open reading frame 47	0.149667	7.8315	5.26734	3.81176e-06	8.95207e-05	3.91518
xilKK1KWQ4ju.uU_RE	HPS5	Hermansky-Pudlak syndrome 5	0.14966	7.60485	5.89823	4.50574e-07	1.53311e-05	6.00741
ZIKnrJ0pLuqgkeCXss	C6orf47	chromosome 6 open reading frame 47	0.149577	7.95705	4.31707	8.64403e-05	0.0011389	0.881664
QUWo3gdkQeXTQvoQh4	LIMK2	LIM domain kinase 2	0.149195	7.84457	3.2306	0.00231868	0.0150455	-2.25353
W7DzRUiKvaSpAt6CnU	BARD1	BRCA1 associated RING domain 1	0.149096	7.65843	3.69915	0.000589354	0.00519994	-0.959199
6e6ETXdRXepdLt_OzQ	APOBR	apolipoprotein B receptor	0.148825	7.76866	3.63333	0.000717971	0.00606287	-1.14692
lVN6KdU6nKJS7insHw	P2RY2	purinergic receptor P2Y, G-protein coupled, 2	0.147532	7.58176	5.12216	6.19806e-06	0.000133789	3.44042
ioeoA3kk0hzl.TVUlI	MASTL	microtubule associated serine/threonine kinase-like	0.147102	7.63546	2.96134	0.00488791	0.0267641	-2.94839
6oOKEK4x3ie6HgekhE	RCN1	reticulocalbin 1, EF-hand calcium binding domain	0.147044	7.76124	5.69005	9.14422e-07	2.78223e-05	5.31282
3REwfFXXzB9wEK9dUs	TRIM78P	tripartite motif containing 78, pseudogene	0.146905	7.61105	4.90908	1.25874e-05	0.000245481	2.74987
uuJ4hIwiDF_t0XNeV0	CASP7	caspase 7, apoptosis-related cysteine peptidase	0.14666	7.51944	5.80022	6.28939e-07	2.01397e-05	5.67999
ckt736erQd5.1ZBeq8	P2RX4	purinergic receptor P2X, ligand-gated ion channel, 4	0.145793	7.75374	3.70315	0.000582293	0.0051582	-0.947725
W0tl0cepeep_6e0ZWs	NA	NA	0.145775	7.62698	4.30107	9.09677e-05	0.00119155	0.832403
ZnvVZDjg6k6.p4Efkg	NA	NA	0.145405	7.82648	4.16762	0.000138888	0.00167343	0.424637
ZunPhR2k868t4PlR54	C9orf66	chromosome 9 open reading frame 66	0.144262	7.67388	5.18263	5.06344e-06	0.000113211	3.63779
6AoeVxP6XuUelBaA6w	ANKRD36B	ankyrin repeat domain 36B	0.144111	7.79315	2.73058	0.00901149	0.0429082	-3.51137
onv2v9enXaV.3Ve_Sc	SNRPB2	small nuclear ribonucleoprotein polypeptide B	0.143816	7.98893	2.94324	0.00513301	0.0278052	-2.99367
9lKpy_uvxzE.qpxetE	ARAP2	ArfGAP with RhoGAP domain, ankyrin repeat and PH domain 2	0.143684	7.71463	3.98786	0.000243739	0.00264145	-0.115633
K6Et_Oq_IF96olI4V0	MRPL17	mitochondrial ribosomal protein L17	0.143378	7.85	2.8126	0.00727269	0.0363081	-3.31491
K63vX_n936K6tkkUjo	TIMELESS	timeless homolog (Drosophila)	0.143342	7.56355	6.23501	1.42852e-07	6.0373e-06	7.13657
0SXIpJz.FN6z863D_w	PMAIP1	phorbol-12-myristate-13-acetate-induced protein 1	0.143235	7.56526	2.84894	0.0066065	0.0338703	-3.22656
ZXgueikvOgonnyoIqs	ARHGEF11	Rho guanine nucleotide exchange factor (GEF) 11	0.142741	7.66301	4.00131	0.000233774	0.00256009	-0.0756071
3RWnpdHnzPCnXVB3T8	RAB24	RAB24, member RAS oncogene family	0.142232	8.085	2.77865	0.00795081	0.0390333	-3.39672
lj3sBXotOu_eo5rl80	SLC25A24	solute carrier family 25 (mitochondrial carrier; phosphate carrier), member 24	0.142193	7.53838	4.86538	1.45436e-05	0.000274649	2.60928
ZlToS17t6OKKHS56SM	SDSL	serine dehydratase-like	0.141993	7.59692	5.18098	5.09148e-06	0.000113695	3.6324
NVuQq1Q5fQEKHO_0pU	IWS1	IWS1 homolog (S. cerevisiae)	0.141449	7.81442	4.8737	1.41493e-05	0.000269704	2.63602
cROkDl1.RDIk6579dE	NA	NA	0.141076	7.62518	3.06385	0.00369412	0.0215254	-2.68847
Zl9JNd9MSyeqAOUg.A	NA	NA	0.141006	7.85183	3.11618	0.00319603	0.0193158	-2.55355
oU.VH5F9O96RS6NJ_k	HINT3	histidine triad nucleotide binding protein 3	0.140961	7.67659	3.1976	0.00254509	0.0161536	-2.34078
Ql.de397vz06DVLzeo	SLFN11	schlafen family member 11	0.139821	7.87631	3.69386	0.0005988	0.00526492	-0.974332
rlnUn_Rv2NUClf.Klg	HIST2H4A	histone cluster 2, H4a	0.139234	7.68228	4.63809	3.06685e-05	0.000497779	1.88439
ZO1Xn4FeIpK6ylOlEM	APOL2	apolipoprotein L, 2	0.139128	7.63852	3.76302	0.000485906	0.00448147	-0.775322
0meR92tN6oxH12HgSI	SESTD1	SEC14 and spectrin domains 1	0.138004	7.72651	4.43481	5.92658e-05	0.000836905	1.24628
6Kp7C5QTh7gqUi4IV4	NA	NA	0.138002	7.56164	5.78188	6.69393e-07	2.12812e-05	5.61881
0okqkpgXf3_SFgS4Ak	ARHGAP17	Rho GTPase activating protein 17	0.137565	7.59944	5.24704	4.08052e-06	9.47023e-05	3.8486
66ciB0Sd6gAiiSEq9U	SLC43A3	solute carrier family 43, member 3	0.137558	7.68628	4.7743	1.96328e-05	0.000345928	2.31749
l6VyLqLXjBUpe3hx.k	RB1	retinoblastoma 1	0.137454	7.65545	5.49421	1.77507e-06	4.8809e-05	4.66281
WpOd.qJ5EvOqKHVHns	TLE4	transducin-like enhancer of split 4 (E(sp1) homolog, Drosophila)	0.137264	7.74784	3.59994	0.000793127	0.00655375	-1.24145
B3O119RVC1aNHZ7.ek	NA	NA	0.136994	7.71482	3.35716	0.00161533	0.0113961	-1.91399
cpTunf6JDvU071OeeE	NA	NA	0.136634	7.49571	5.41015	2.35747e-06	6.14817e-05	4.38506
ceO2n_o54Le0KDO6FU	AGPS	alkylglycerone phosphate synthase	0.135955	7.69536	4.85793	1.49057e-05	0.000278211	2.58535
lFMeX4PHsnkyOdfC_o	NA	NA	0.135791	7.54944	5.60117	1.23609e-06	3.55335e-05	5.01733
c57HPUV.oZdNShkih0	CLDN23	claudin 23	0.13571	7.52457	5.1009	6.65377e-06	0.000141108	3.3712
N1c9slN1ulDuHFuUkk	ABCD1	ATP-binding cassette, sub-family D (ALD), member 1	0.135251	7.59692	2.69773	0.00981005	0.0454874	-3.58892
iOBucgSdFkeOeV6p7g	NLRC4	NLR family, CARD domain containing 4	0.135161	7.74475	3.40563	0.00140402	0.0102525	-1.78186
KlLxSPETVS659fHUoU	DRG1	developmentally regulated GTP binding protein 1	0.135044	7.83786	3.52637	0.000986244	0.00782806	-1.44806
Ne9J0pEqkSSK.qCa3U	SLC37A1	solute carrier family 37 (glycerol-3-phosphate transporter), member 1	0.134407	7.62266	5.25341	3.99418e-06	9.30644e-05	3.8695
Qj_97rsrORPUys5EaU	FAM18B1	family with sequence similarity 18, member B1	0.134206	7.75984	3.35744	0.00161402	0.0113914	-1.91322
3CdSt82zV_U3gfv5Hk	AKAP7	A kinase (PRKA) anchor protein 7	0.134072	7.72699	2.97164	0.00475334	0.0262137	-2.92253
lLpe54IukICShoq4Ec	TIPRL	TIP41, TOR signaling pathway regulator-like (S. cerevisiae)	0.13393	7.86509	3.4266	0.00132104	0.00981519	-1.72438
3kLhNJ6e459gMreddE	RAB7L1	RAB7, member RAS oncogene family-like 1	0.133789	7.93759	3.41806	0.00135427	0.00998397	-1.74783
6qyJeQheIX1D564ro4	FAM82A2	family with sequence similarity 82, member A2	0.133205	8.03191	3.43581	0.00128607	0.00961322	-1.69906
Q13VUdxtx69ahqiNUw	SIGLEC5	sialic acid binding Ig-like lectin 5	0.132656	7.74518	3.12254	0.00314006	0.0190981	-2.53707
QKpVJLBAqxdSq.qyZ4	FTSJD2	FtsJ methyltransferase domain containing 2	0.132609	7.53431	3.83794	0.000386799	0.0037947	-0.557612
TFkYRSRo3RorTokj0Q	UTRN	utrophin	0.13254	7.66191	3.80324	0.000430011	0.00409389	-0.658742
cj3ouCSO8dhf_3VKe4	MRPS30	mitochondrial ribosomal protein S30	0.132489	7.88109	3.83554	0.000389646	0.00381418	-0.564618
iROlXjptXnr.Q93gl8	SLC24A4	solute carrier family 24 (sodium/potassium/calcium exchanger), member 4	0.132134	7.77921	3.35349	0.0016325	0.0114807	-1.92394
BUxJ_hITrr3j5eojJU	NA	NA	0.131923	7.78054	3.59621	0.000801984	0.00660229	-1.25199
3OSjt1DEGElSCKC5JQ	NA	NA	0.131362	7.59226	3.76521	0.000482694	0.00445416	-0.768998
9oen96_j9Kwju.ClIk	IGF2BP3	insulin-like growth factor 2 mRNA binding protein 3	0.130052	7.50476	4.57683	3.7438e-05	0.000581467	1.691
0k3LjKLLuiYgukgRck	NA	NA	0.130021	7.58673	3.77666	0.000466206	0.00434458	-0.735854
TtB.31XH1eT913udHk	LILRB2	leukocyte immunoglobulin-like receptor, subfamily B (with TM and ITIM domains), member 2	0.129962	7.71259	4.51556	4.56668e-05	0.000680125	1.49852
EheiMqyXn_XuuoJ0sE	BIRC2	baculoviral IAP repeat containing 2	0.129931	7.82818	3.66247	0.000658007	0.0056839	-1.06403
QgrTBiLqB0FSNWVde0	FXYD6	FXYD domain containing ion transport regulator 6	0.129027	7.52078	4.73212	2.25494e-05	0.000388144	2.18291
WcrUqIApLr6rx6A.50	RUFY3	RUN and FYVE domain containing 3	0.128531	7.73654	4.50557	4.71678e-05	0.000697783	1.46721
lUaXiuv3fiHbx6k0sg	C3orf14	chromosome 3 open reading frame 14	0.128265	7.61101	4.40823	6.45566e-05	0.00090369	1.16361
6VQofeoEor24T2icXg	PCK2	phosphoenolpyruvate carboxykinase 2 (mitochondrial)	0.128004	7.78836	3.40386	0.00141126	0.0102969	-1.78671
WXQOogeuF3LpU4Ul5I	NA	NA	0.127155	7.55844	4.79401	1.84007e-05	0.000329464	2.38049
iyq_JRTeFkJ5tu2Wvc	SLC3A2	solute carrier family 3 (activators of dibasic and neutral amino acid transport), member 2	0.127129	7.61532	4.60066	3.46457e-05	0.000548189	1.76613
uSC2Dit6C6ijp2vN0g	CLEC1B	C-type lectin domain family 1, member B	0.126569	7.60588	3.1352	0.00303127	0.0186123	-2.50417
KSbZQBy7388uXdEAjU	USP25	ubiquitin specific peptidase 25	0.126035	7.53288	4.07915	0.000183389	0.00211423	0.15739
i.kl53LqElSJenlTTs	PKM2	pyruvate kinase, muscle	0.12514	7.66637	3.30221	0.00189134	0.0128518	-2.06237
0bMAcJ7lUFGeFO00oU	SIGLEC16	sialic acid binding Ig-like lectin 16 (gene/pseudogene)	0.12501	7.51845	4.97092	1.0255e-05	0.00020496	2.94945
6n5.13qRFP_NPBSLF0	TMEM167A	transmembrane protein 167A	0.124803	7.66534	3.35883	0.00160754	0.0113658	-1.90944
NfUlLd7FkbWif23GHs	FOXC1	forkhead box C1	0.124713	7.57153	3.61735	0.000753051	0.00628714	-1.19223
ldIp7Ktfq8SJaogYL0	TOR3A	torsin family 3, member A	0.124451	7.64716	2.85729	0.0064617	0.0333335	-3.20615
B3p6MO9LtqkaIsV7ok	MARCO	macrophage receptor with collagenous structure	0.124439	7.61159	2.7309	0.00900417	0.0428964	-3.51063
05.K._ASVaYZdz6d2k	H1FX	H1 histone family, member X	0.124367	7.93536	3.0675	0.00365711	0.0213801	-2.6791
TlzASPjkbrqBXicsl8	GGPS1	geranylgeranyl diphosphate synthase 1	0.123419	8.06	3.57522	0.00085357	0.00695583	-1.31114
cnt0V_fkASOl_iFIdU	KIAA0040	KIAA0040	0.122774	7.7829	3.49262	0.0010892	0.00845948	-1.54204
lFD0SoByIcae66wXkg	STAP1	signal transducing adaptor family member 1	0.122494	7.61781	3.08789	0.00345683	0.0205212	-2.62666
3CxBSZ.pBjqeTiWeh4	PUS1	pseudouridylate synthase 1	0.122432	7.66248	4.7421	2.18226e-05	0.000377747	2.21474
QTo5QWtFSijpAiLZN0	CD40	CD40 molecule, TNF receptor superfamily member 5	0.121883	7.57934	4.84851	1.53762e-05	0.000284518	2.55511
cFyPXA4eTKEjVN11FQ	KMO	kynurenine 3-monooxygenase (kynurenine 3-hydroxylase)	0.121801	7.56316	5.42617	2.23354e-06	5.87689e-05	4.43791
EW1FuE685NfyPBdFA4	FBXO28	F-box protein 28	0.121722	7.70113	3.86926	0.000351432	0.00352188	-0.465971
3PgKIkGqeKW7SRjoVQ	FCAR	Fc fragment of IgA, receptor for	0.121558	7.83622	2.67613	0.0103699	0.0473273	-3.63952
Wun30466_q6_07hq1U	APOL2	apolipoprotein L, 2	0.121532	7.62176	3.35497	0.00162553	0.0114498	-1.91991
B6KklUShr84kRDzJ_8	CAPN2	calpain 2, (m/II) large subunit	0.121249	7.66108	5.2221	4.43639e-06	0.000101761	3.76691
ulJrj5x_Ky..EHFP1U	C3orf58	chromosome 3 open reading frame 58	0.120772	7.59705	3.57406	0.000856512	0.00697339	-1.3144
Bqujf1On3UCeuH1hEk	RNF135	ring finger protein 135	0.120718	7.6463	3.81569	0.000413994	0.00399728	-0.622505
lgkOHup6gHsXF3fVHk	ZNF410	zinc finger protein 410	0.120388	7.92738	3.87174	0.000348767	0.00350509	-0.458693
fo.6Hp2kRI44DhKcbo	MAPK14	mitogen-activated protein kinase 14	0.120304	7.65645	3.07839	0.00354889	0.0209099	-2.65114
BlpDqSl5Ax6RIk8NMQ	HMGCS1	3-hydroxy-3-methylglutaryl-CoA synthase 1 (soluble)	0.120188	7.69709	4.28824	9.47632e-05	0.00122918	0.792969
9Hyu.STI9S.ZFepIVU	DENND1A	DENN/MADD domain containing 1A	0.119831	7.56464	4.24039	0.000110329	0.00138463	0.64633
ig3Xne4Oc0hVApQX6k	SLC39A11	solute carrier family 39 (metal ion transporter), member 11	0.118881	7.58558	3.80929	0.000422156	0.00404739	-0.641143
K_L4CwEQnp59XukHuk	PTPRO	protein tyrosine phosphatase, receptor type, O	0.118722	7.56307	5.81668	5.94692e-07	1.94295e-05	5.73494
3rF5JIKIISXggjknjo	QKI	quaking homolog, KH domain RNA binding (mouse)	0.11867	7.65241	3.41585	0.00136297	0.0100313	-1.75387
Kr11jfEp01K9QLn3t0	SLC24A4	solute carrier family 24 (sodium/potassium/calcium exchanger), member 4	0.118455	7.62139	4.12424	0.000159212	0.00187829	0.293265
ZSUd4kjeB87S0dUMSo	C12orf5	chromosome 12 open reading frame 5	0.117432	7.65107	4.18149	0.000132941	0.00161684	0.466759
BCrSnX.y9Ij0pJR1S4	MUDENG	MU-2/AP1M2 domain containing, death-inducing	0.117269	7.91686	3.00847	0.00430009	0.0241503	-2.82962
EtIF_jxAF2JX3Sy654	SQLE	squalene epoxidase	0.117245	7.62515	4.84498	1.55567e-05	0.000287255	2.54376
BlfewJg4o6Gbq4XCn0	MEF2A	myocyte enhancer factor 2A	0.117058	7.52896	4.26105	0.000103325	0.00131817	0.709556
fXjLe7Ek_.7eoJKj54	RBM45	RNA binding motif protein 45	0.116864	7.58449	4.25479	0.0001054	0.00133506	0.69039
cbLX7qElLrSO5JdKIw	ZNF350	zinc finger protein 350	0.116739	7.53458	5.32866	3.10201e-06	7.58706e-05	4.11659
lxqtHVEuCQp4eOMeWQ	RNFT1	ring finger protein, transmembrane 1	0.116695	7.67755	3.23543	0.00228725	0.0148871	-2.24074
0UCqhT0rcAJhK1iHq0	HEG1	HEG homolog 1 (zebrafish)	0.116689	7.6414	5.01894	8.74266e-06	0.000178564	3.10493
ZKcgDHZH10gV39_8Go	BMPR2	bone morphogenetic protein receptor, type II (serine/threonine kinase)	0.116623	7.57425	3.89946	0.000320297	0.00327283	-0.377245
NEt5N8yS5f7dKl3npI	TRIM68	tripartite motif containing 68	0.116157	7.65077	4.07441	0.00018613	0.00214025	0.143139
uQu4KCu44Oe6IpN6BI	DDX52	DEAD (Asp-Glu-Ala-Asp) box polypeptide 52	0.116042	7.7744	3.69943	0.000588856	0.00519994	-0.958394
iiHrXr.vV.rEhd_0uc	GTF2E1	general transcription factor IIE, polypeptide 1, alpha 56kDa	0.115747	7.57829	3.91206	0.000308109	0.00317185	-0.340122
Zl5rjUey5KT6md6Rfc	PTPN2	protein tyrosine phosphatase, non-receptor type 2	0.115619	7.65458	3.35968	0.00160364	0.0113499	-1.90715
TmLC8Arm3eeXpCdVG8	FAM21A	family with sequence similarity 21, member A	0.115431	7.57962	4.96784	1.03601e-05	0.000206132	2.93951
ce4LrrtK4gptRAIqiA	B4GALT4	UDP-Gal:betaGlcNAc beta 1,4- galactosyltransferase, polypeptide 4	0.115204	7.56716	4.59776	3.49747e-05	0.00055199	1.75697
3.orDPq_D3h5V.cnoU	RPE	ribulose-5-phosphate-3-epimerase	0.115134	7.5746	4.09133	0.000176528	0.00204712	0.194023
NXSh_QAat0k5fVIlOI	ARSD	arylsulfatase D	0.114632	7.65476	2.83934	0.00677677	0.0345233	-3.24998
W.knji5z0AKCrN6CWk	GPD2	glycerol-3-phosphate dehydrogenase 2 (mitochondrial)	0.114588	7.56649	3.3766	0.00152719	0.0109267	-1.86114
xtPfn5H1XPhE4Ce764	UBE2K	ubiquitin-conjugating enzyme E2K	0.114518	7.82386	3.32799	0.00175668	0.0121751	-1.99293
Ev9E_nvELmKLup553U	TRIP6	thyroid hormone receptor interactor 6	0.114146	7.66164	4.08707	0.000178897	0.00206918	0.181214
WeV_fBDlpQemF0a_R8	SLC25A25	solute carrier family 25 (mitochondrial carrier; phosphate carrier), member 25	0.114034	7.82545	4.64544	2.99421e-05	0.000490486	1.90764
issrn9eNV.mI57q5wQ	KCTD14	potassium channel tetramerisation domain containing 14	0.113746	7.53468	4.26932	0.000100645	0.00128959	0.734894
TijTxIhId1YhOpRHjI	RHOT1	ras homolog gene family, member T1	0.113654	7.71703	4.34953	7.79254e-05	0.00104776	0.981775
Z0Yg7oquqrtLoCkwp4	IER2	immediate early response 2	0.113472	7.96763	2.65472	0.0109538	0.0493437	-3.6894
9KO_S6XCiSX.ogqvU8	UBA3	ubiquitin-like modifier activating enzyme 3	0.113111	7.88102	3.33065	0.00174332	0.0121157	-1.98575
9gh6h9VNe6NU_yiJSA	BRD7P3	bromodomain containing 7 pseudogene 3	0.112924	7.58194	4.12584	0.00015841	0.00187258	0.298115
fuiuqN5UElKKR5IJ3c	DDAH2	dimethylarginine dimethylaminohydrolase 2	0.112717	7.6966	3.01345	0.004242	0.0239227	-2.81699
ZqygilO.S9v93sq2Pg	GCNT1	glucosaminyl (N-acetyl) transferase 1, core 2	0.112654	7.66629	3.98995	0.000242167	0.00262763	-0.109429
H34p74gHyhIJcXTVKU	NAGA	N-acetylgalactosaminidase, alpha-	0.11254	7.54699	4.84383	1.56155e-05	0.000287443	2.54009
WFCuSI6EIklKIVJjeI	PLIN2	perilipin 2	0.111496	7.71084	3.3396	0.00169907	0.0118593	-1.96156
WLgCQqFRcTxfSiHvcU	ARL5B	ADP-ribosylation factor-like 5B	0.111363	7.62725	2.92492	0.0053928	0.028898	-3.03933
orrHujizeQhSePv9Ok	RTCD1	RNA terminal phosphate cyclase domain 1	0.111052	7.76208	3.48923	0.00110008	0.00852153	-1.55144
r6E56JI6F46EzaFKKU	DTNBP1	dystrobrevin binding protein 1	0.11084	7.59419	4.47815	5.15387e-05	0.000748685	1.38143
0fUt.8gbrooq_7uVSo	ADPRH	ADP-ribosylarginine hydrolase	0.110681	7.57306	4.30082	9.10416e-05	0.00119155	0.831619
KLj.rpSwOUlP3QFRdo	ELMO2	engulfment and cell motility 2	0.110225	7.62663	3.38887	0.00147395	0.0106316	-1.82769
6ShS8R1MZAWYxP_eBA	RTCD1	RNA terminal phosphate cyclase domain 1	0.109962	7.74336	3.11696	0.00318918	0.0192942	-2.55155
ZOidegkki1.hUoLn0o	SMARCAL1	SWI/SNF related, matrix associated, actin dependent regulator of chromatin, subfamily a-like 1	0.109671	7.69419	4.56511	3.88901e-05	0.00059832	1.65412
Qmd6QFgCjh6GtXzpZM	IL4I1	interleukin 4 induced 1	0.109428	7.54344	4.14666	0.00014837	0.00176978	0.361092
QlPfTT78D.p6OUBXqE	DHX36	DEAH (Asp-Glu-Ala-His) box polypeptide 36	0.109325	7.61503	4.27603	9.85185e-05	0.00126845	0.755487
0JYKEkJ0rogLlAHvOU	MS4A14	membrane-spanning 4-domains, subfamily A, member 14	0.109113	7.53102	4.03904	0.000207868	0.00233118	0.0370768
Bfd.fRDs7XS6xc8_OU	ZNF330	zinc finger protein 330	0.109051	7.6099	4.39793	6.6727e-05	0.000930395	1.13165
HigeI0SoKI_iuMUkSE	SP140L	SP140 nuclear body protein-like	0.108734	7.61093	3.49689	0.00107562	0.00837234	-1.53017
uF_JShglCEG4dULJKI	PAG1	phosphoprotein associated with glycosphingolipid microdomains 1	0.10855	7.73112	3.30767	0.00186204	0.012726	-2.0477
3tP.i61CXnv_BUSS6I	UTP14C	UTP14, U3 small nucleolar ribonucleoprotein, homolog C (yeast)	0.108268	7.70526	3.31467	0.0018251	0.0125461	-2.02886
ok0Fe53OSU4FlD1lCQ	GPR84	G protein-coupled receptor 84	0.108217	7.60557	3.79412	0.000442117	0.0041777	-0.685238
6S0SU1qAN0zSV_KCUI	GART	phosphoribosylglycinamide formyltransferase, phosphoribosylglycinamide synthetase, phosphoribosylaminoimidazole synthetase	0.108196	7.68633	4.05733	0.000196334	0.00222864	0.0918816
9OsBIBJN9nEFHhFJ6Y	SBF2	SET binding factor 2	0.107992	7.68586	3.83351	0.000392076	0.00383584	-0.570556
BenUqXufgChIws_VIk	EPS15	epidermal growth factor receptor pathway substrate 15	0.107937	7.67825	3.70614	0.000577072	0.00512477	-0.939152
ufXxQuB1OlUCRSODvs	MERTK	c-mer proto-oncogene tyrosine kinase	0.107347	7.4716	3.91348	0.000306765	0.00316488	-0.335938
rU.5WD18RXiUBWo7f4	P2RY12	purinergic receptor P2Y, G-protein coupled, 12	0.10663	7.55409	4.55274	4.04838e-05	0.000618006	1.6152
iWqO3o54QqIlCx7w5Q	UPRT	uracil phosphoribosyltransferase (FUR1) homolog (S. cerevisiae)	0.106482	7.57841	4.66214	2.83528e-05	0.000470987	1.96056
lXtTHkoqVCI10tD7UU	NA	NA	0.105979	7.59582	3.22019	0.00238799	0.0153769	-2.28113
K9jjedE9ed3Fx9_s9Y	CWF19L2	CWF19-like 2, cell cycle control (S. pombe)	0.105209	7.60524	3.47048	0.00116222	0.00888246	-1.6034
opxN0zuc4ofclLq6Z4	NA	NA	0.105154	7.59637	4.01444	0.000224423	0.00248225	-0.0364534
i0KuGYneV.BaAbdXnQ	SCAND1	SCAN domain containing 1	0.104871	7.7475	3.71234	0.000566388	0.00504375	-0.921358
cFIhp.vdUnCluiee7g	FAM125B	family with sequence similarity 125, member B	0.10487	7.58362	3.52396	0.000993285	0.00787336	-1.45479
iq7yfiOvArr_qKh9vs	YWHAE	tyrosine 3-monooxygenase/tryptophan 5-monooxygenase activation protein, epsilon polypeptide	0.104691	7.98308	2.67812	0.0103172	0.0471576	-3.63488
TlBKgi7ZFSiAvDkEoU	LARP7	La ribonucleoprotein domain family, member 7	0.103595	7.61121	3.29518	0.00192976	0.0130628	-2.08127
iF6ud6eiKAJS9XGKLs	PSEN2	presenilin 2 (Alzheimer disease 4)	0.10319	7.65215	3.3183	0.0018062	0.0124404	-2.01907
NoEh4gqQE9eonqQojU	NR1H3	nuclear receptor subfamily 1, group H, member 3	0.103123	7.55818	3.22275	0.00237077	0.0152964	-2.27435
x6VKIeFQLgoT5aiKXk	UBFD1	ubiquitin family domain containing 1	0.102609	7.53119	3.36629	0.00157332	0.0111799	-1.88917
ZOIEn_SUh01JmklESE	ANKFY1	ankyrin repeat and FYVE domain containing 1	0.102521	7.55832	3.80076	0.000433262	0.0041182	-0.66593
lo1eNU.13htRdcVTKI	CDK2	cyclin-dependent kinase 2	0.102378	7.64304	3.48336	0.00111918	0.00863172	-1.56772
0k6KSu.UKu3TweyeQI	SLITRK4	SLIT and NTRK-like family, member 4	0.10202	7.51953	3.87415	0.000346195	0.0034864	-0.451615
uVJQSC5O1HualLu78Q	C12orf76	chromosome 12 open reading frame 76	0.101715	7.75519	2.66833	0.0105792	0.0480968	-3.65773
93QBU6KinnruspIFyk	TAPBP	TAP binding protein (tapasin)	0.101579	7.62574	3.84372	0.000380022	0.00374065	-0.540723
Tqi7yiSUoe7Lu7_vk0	ACSL3	acyl-CoA synthetase long-chain family member 3	0.100388	7.52785	3.70789	0.000574029	0.00510543	-0.934118
65c3o6fdIJ2lctdXl8	C6orf89	chromosome 6 open reading frame 89	0.10024	7.58399	4.3723	7.2444e-05	0.000989081	1.05222
ZCNuyPqvqio4KmLg3A	TOP1	topoisomerase (DNA) I	0.0998469	7.68426	2.81439	0.00723838	0.0361572	-3.31056
99xXCJZTR9KWev7SU0	LNPEP	leucyl/cystinyl aminopeptidase	0.0995898	7.76025	3.33464	0.00172347	0.0119951	-1.97498
3oT.ewg9fveEVUBK5I	NA	NA	0.0994107	7.53039	2.83101	0.0069277	0.0350202	-3.27024
c6OcVDNS8w0pdBve0o	LLPH	LLP homolog, long-term synaptic facilitation (Aplysia)	0.0993959	7.75795	3.05565	0.00377847	0.0218943	-2.70947
3gLIXo9O6nfU6fC75U	DRAM2	DNA-damage regulated autophagy modulator 2	0.0990995	7.62204	2.90412	0.0057026	0.0301798	-3.09092
93RPVQ6c6CtzXRLleo	OSBPL9	oxysterol binding protein-like 9	0.0990773	7.77067	3.02232	0.00414034	0.0234461	-2.79447
cV1IC9EGk6OF0.yOpE	GOSR2	golgi SNAP receptor complex member 2	0.0986768	7.62781	3.98569	0.00024539	0.00265447	-0.122107
9HH0g1JJ3V0k1fApUE	INTS12	integrator complex subunit 12	0.0981111	7.90808	3.39964	0.00142864	0.0103852	-1.79825
Wf_S0NV51zX6VekBHo	METTL4	methyltransferase like 4	0.0976903	7.54633	4.54231	4.1877e-05	0.000634352	1.58242
cOpXEtXqcRecSWq7TQ	ADCY4	adenylate cyclase 4	0.0975584	7.61035	3.27198	0.00206179	0.0137153	-2.14341
EpTVAnPeqkEiuAcepQ	FUCA2	fucosidase, alpha-L- 2, plasma	0.0973438	7.71673	3.68727	0.000610798	0.00535181	-0.993211
od8q77LJ4BOiObJ7Tk	BMPR2	bone morphogenetic protein receptor, type II (serine/threonine kinase)	0.0972679	7.59562	4.00748	0.000229333	0.00252238	-0.0572125
NirqREVJpeSLCfPFRA	NKIRAS2	NFKB inhibitor interacting Ras-like 2	0.0972389	7.88089	2.97651	0.00469101	0.0259264	-2.9103
EZb_oGQf4ohLmuh9Lg	C11orf67	chromosome 11 open reading frame 67	0.0970649	7.68085	3.04488	0.00389206	0.0223768	-2.73701
iLeyXVY1C9chdOntV0	ZNF385A	zinc finger protein 385A	0.0966117	7.75548	2.76873	0.00815979	0.0397725	-3.4205
HXJ1__uJ9_5fDXuFSU	APEX2	APEX nuclease (apurinic/apyrimidinic endonuclease) 2	0.0947832	7.88079	3.04473	0.00389362	0.0223785	-2.73739
ZeSTlS5RkSueFzLC58	CHRNB1	cholinergic receptor, nicotinic, beta 1 (muscle)	0.0946655	7.64087	3.08717	0.00346379	0.0205484	-2.62854
WlpdLtTve7bEZ_Aizg	HPS3	Hermansky-Pudlak syndrome 3	0.0946277	7.75003	3.31005	0.00184939	0.0126542	-2.04129
NirukA6Jf0TXLrpT_s	ARMCX3	armadillo repeat containing, X-linked 3	0.0943825	7.50298	5.02634	8.53023e-06	0.000175033	3.12891
HYjigsCL.Yu_SnTq7k	ETNK1	ethanolamine kinase 1	0.0934256	7.62708	4.3436	7.94162e-05	0.00106296	0.963477
6km8elzs01tzp9RUt0	SLC26A8	solute carrier family 26, member 8	0.0931924	7.56015	3.3705	0.00155431	0.0110894	-1.87772
Np1_oHiEzdKg67e50k	FIBP	fibroblast growth factor (acidic) intracellular binding protein	0.0928292	7.52007	4.37076	7.28042e-05	0.000993234	1.04743
B.we.lHnldFXlad6LE	NFE2L1	nuclear factor (erythroid-derived 2)-like 1	0.0926758	7.68577	3.05961	0.00373756	0.0217199	-2.69935
3NFeCidHuYgxeR4lpc	SNX20	sorting nexin 20	0.0922717	7.51255	3.92363	0.000297322	0.00308978	-0.306012
cuUI45Qqe4.XrqCAgo	NA	NA	0.0921307	7.53437	4.57777	3.73231e-05	0.000580261	1.69397
rl97KD3.qguKCUrUa0	CD83	CD83 molecule	0.0921095	7.62878	3.58026	0.000840908	0.00688751	-1.29696
Ko76fR15JEOelcgJiQ	NFYA	nuclear transcription factor Y, alpha	0.092093	7.65573	3.81118	0.000419727	0.00402847	-0.635634
EK.h0Lunsep0Ip9F3o	TRIM69	tripartite motif containing 69	0.0915965	7.55604	4.85721	1.49412e-05	0.000278211	2.58303
uV36FXivx1Fkl5Ilug	CES1P1	carboxylesterase 1 pseudogene 1	0.0914172	7.53665	4.16923	0.000138186	0.0016689	0.429511
3bSvt96nu6Fw_Hn7VI	TRIP4	thyroid hormone receptor interactor 4	0.0906002	7.84079	3.03512	0.00399766	0.022821	-2.7619
0e0En54KJ4jilURSh4	SIL1	SIL1 homolog, endoplasmic reticulum chaperone (S. cerevisiae)	0.09054	7.53654	3.58115	0.000838672	0.00687238	-1.29443
foC4I5IvHum.pGpNG4	NA	NA	0.0904724	7.73437	3.21632	0.00241424	0.0155234	-2.29137
94onKnQ4TghIqc4pKU	ZNF259	zinc finger protein 259	0.0900566	7.5991	2.88641	0.00597931	0.0313074	-3.13465
QiEK.53vlSfodgf16k	SAMHD1	SAM domain and HD domain 1	0.0900121	7.52852	3.09475	0.00339181	0.0202298	-2.60897
KqOhjdUX9qU75VbiUM	AXL	AXL receptor tyrosine kinase	0.0896467	7.53295	4.39448	6.74694e-05	0.00093853	1.12096
oq.teU5_rvTUvQofUU	TATDN3	TatD DNase domain containing 3	0.0894604	7.70688	3.57658	0.00085014	0.00694386	-1.30732
HVE9Hnh6fR6DK9K0Wo	EXOC2	exocyst complex component 2	0.0893847	7.61434	4.0256	0.000216758	0.00241454	-0.00310996
KkjlExIsiYKT_uja0c	RHBDD1	rhomboid domain containing 1	0.0888311	7.73971	3.78096	0.000460165	0.00430232	-0.723412
rJdVC9Q6P5fdAOxBwk	C1GALT1C1	C1GALT1-specific chaperone 1	0.0885721	7.52473	3.48852	0.0011024	0.00853201	-1.55343
TuvePl6iMlQOXEl3ek	NA	NA	0.0885646	7.66799	3.05474	0.00378792	0.0219061	-2.71179
QS47Yd.lRZTdSe_UIQ	C9orf72	chromosome 9 open reading frame 72	0.0883447	7.63306	2.76561	0.0082265	0.0400646	-3.42796
NkY97h7.3e.Rvb4uwk	ETNK1	ethanolamine kinase 1	0.0882647	7.49587	4.33083	8.27267e-05	0.00109814	0.924048
rp3Veu6XldX_H6r_f8	KIAA1958	KIAA1958	0.0880068	7.57551	2.83805	0.00679993	0.034609	-3.25312
BU6gOUeyttjF3p4KPk	TMPO	thymopoietin	0.0879783	7.48251	4.59106	3.57447e-05	0.000561639	1.73586
BUbFUAIwntdI119xUo	SNX19	sorting nexin 19	0.0878905	7.56887	5.44962	2.06357e-06	5.49606e-05	4.51538
EkKeh7jfQ015U3esVc	PARP3	poly (ADP-ribose) polymerase family, member 3	0.0878728	7.50116	3.98606	0.000245104	0.002653	-0.120988
Hqt4UpCe43gKJCgSQo	RAB20	RAB20, member RAS oncogene family	0.0877652	7.55659	2.81626	0.00720276	0.0360505	-3.30603
cieXlOM4AI3U9dS.UM	NA	NA	0.0875289	7.54668	4.50257	4.76276e-05	0.000702239	1.45782
6vkiW7QjiKgmyFkhW4	NA	NA	0.0873974	7.59181	3.71961	0.000554102	0.00496059	-0.900475
6tc7g4nzV1EFK5M4C4	ZNF189	zinc finger protein 189	0.0872442	7.58058	3.29486	0.0019315	0.0130685	-2.08211
9pfR5xlXpVAEiJCEvs	PPP1R3D	protein phosphatase 1, regulatory (inhibitor) subunit 3D	0.0868147	7.80119	2.82447	0.0070485	0.0354703	-3.28613
NgeE6ahUKUUIlSCCuQ	CBR1	carbonyl reductase 1	0.086797	7.5389	3.09886	0.00335347	0.0200823	-2.59838
N5F99J5Nemt99RFUxY	NA	NA	0.0859674	7.59147	3.932	0.000289736	0.00302337	-0.281268
0q.ElI0Vp_D58S7st0	TIFA	TRAF-interacting protein with forkhead-associated domain	0.0854005	7.54899	3.64417	0.000695069	0.0059253	-1.11611
fcjV9PPfzlUiwNUjo0	TAF1B	TATA box binding protein (TBP)-associated factor, RNA polymerase I, B, 63kDa	0.0849365	7.51477	3.57775	0.000847189	0.00692614	-1.30402
ioJIoIo4AO5S4n4tfo	NDC80	NDC80 homolog, kinetochore complex component (S. cerevisiae)	0.084843	7.52869	3.76885	0.00047739	0.00441673	-0.758463
KlNYvHTiFLlTgrSHik	UCHL3	ubiquitin carboxyl-terminal esterase L3 (ubiquitin thiolesterase)	0.0838191	7.58542	2.70439	0.00964298	0.0448772	-3.57325
xu.jfK3TjeLkxXdSgo	UPF3B	UPF3 regulator of nonsense transcripts homolog B (yeast)	0.083341	7.60628	4.3273	8.36636e-05	0.00110809	0.913177
Eks.sXUg6SNXSSgQKQ	ANKMY2	ankyrin repeat and MYND domain containing 2	0.0829181	7.54863	3.19957	0.00253101	0.0161046	-2.33559
KNnO6Us5RIO1wFfnl0	EIF2AK1	eukaryotic translation initiation factor 2-alpha kinase 1	0.0824452	7.58743	4.02403	0.000217823	0.00242135	-0.00781409
WgflI5AxRIdQgBWL6o	TCERG1	transcription elongation regulator 1	0.0824403	7.67963	2.72717	0.00909142	0.043138	-3.51945
3OZ6_QLrtJ7qjfqV28	C12orf76	chromosome 12 open reading frame 76	0.082336	7.70514	2.77728	0.00797943	0.0391412	-3.40002
KpS.zgn_gpHOhIJ66E	SFT2D2	SFT2 domain containing 2	0.082283	7.56497	2.95505	0.00497186	0.0271482	-2.96416
iXcmn1L1WdeHXhdSjs	MED24	mediator complex subunit 24	0.0821807	7.66239	2.92599	0.00537734	0.0288464	-3.03667
6d4iRIopAJ97qO5y2k	ARMCX3	armadillo repeat containing, X-linked 3	0.0808061	7.54295	5.48315	1.84266e-06	5.03548e-05	4.62622
BiglKEaC4iEcCCu6lI	DDB2	damage-specific DNA binding protein 2, 48kDa	0.0803693	7.47123	4.53859	4.23847e-05	0.000639309	1.57075
xdQK6yQiixUvKr6JVQ	PIP4K2C	phosphatidylinositol-5-phosphate 4-kinase, type II, gamma	0.0800953	7.69098	3.48523	0.00111307	0.00859206	-1.56254
6k7fke9BdeLrZ.BBdQ	FBXO28	F-box protein 28	0.0797732	7.77497	3.05588	0.00377607	0.0218876	-2.70888
Wmu0l.30iT_.h4fUCQ	SLC35B3	solute carrier family 35, member B3	0.0796824	7.59214	2.79912	0.00753527	0.0373035	-3.34748
xnAgwhfn4gp4XoVdXo	RSPH9	radial spoke head 9 homolog (Chlamydomonas)	0.0794236	7.55909	3.57213	0.000861423	0.00700693	-1.31982
9oizg6tTCVagOjELII	RPF1	ribosome production factor 1 homolog (S. cerevisiae)	0.0785844	7.66234	2.90467	0.00569409	0.0301528	-3.08954
KqjdRv41v9JLneCizc	GGCT	gamma-glutamylcyclotransferase	0.0780943	7.58112	3.28609	0.00198051	0.0132844	-2.10565
Qd3UToF9eof4.xozfk	TNFSF13	tumor necrosis factor (ligand) superfamily, member 13	0.0780245	7.55035	3.38496	0.00149071	0.0107176	-1.83835
K4Ou.WiiQtf9QeruTk	PHTF1	putative homeodomain transcription factor 1	0.0774077	7.67109	2.79691	0.00757921	0.0374582	-3.35281
0f9QvVClxJ4JXysXu8	CPT1B	carnitine palmitoyltransferase 1B (muscle)	0.0769438	7.60445	2.80187	0.00748097	0.0371073	-3.34084
fpMsXilKK1KWQ4ju.s	HPS5	Hermansky-Pudlak syndrome 5	0.0767998	7.66513	2.90015	0.0057636	0.0304027	-3.10074
upK6dUDxaAoe9_Kz0o	EFCAB11	EF-hand calcium binding domain 11	0.0763773	7.69211	3.2539	0.00217053	0.0142759	-2.19163
0nfooGJAEgmuTF0iXo	TOMM40L	translocase of outer mitochondrial membrane 40 homolog (yeast)-like	0.0761563	7.55904	3.09931	0.00334923	0.0200637	-2.5972
oqde_X9IoLeEcSb6RI	SENP2	SUMO1/sentrin/SMT3 specific peptidase 2	0.0758902	7.67659	3.15259	0.00288759	0.0178664	-2.45883
EkUolUUFUBTmiDyL0k	P2RY6	pyrimidinergic receptor P2Y, G-protein coupled, 6	0.0758543	7.52069	4.75561	2.08761e-05	0.000364569	2.25782
HU_O.C78gNMgrsp57o	BCAS2	breast carcinoma amplified sequence 2	0.0756469	7.53496	3.45681	0.00120964	0.00914338	-1.64119
0iAjq_cijrIHoJCknE	TMEM199	transmembrane protein 199	0.0753746	7.73756	2.73677	0.008868	0.0424074	-3.4967
fRixf_jXxuBdnXp7I0	FAM160B1	family with sequence similarity 160, member B1	0.0750117	7.54625	3.04888	0.00384944	0.022175	-2.72678
ZUlPV4Uh3O6qIOX6iE	NLRP3	NLR family, pyrin domain containing 3	0.0741112	7.55902	2.68915	0.0100289	0.046229	-3.60905
cU0sCFU3l_1OW.VBKg	CLEC1A	C-type lectin domain family 1, member A	0.0738657	7.48788	4.26026	0.000103585	0.00131917	0.707132
WR5I5rReHhRer.c8Us	CACNA1E	calcium channel, voltage-dependent, R type, alpha 1E subunit	0.0735289	7.52829	3.2939	0.00193681	0.0130855	-2.08469
9bkrTn_iXOR7EQKQBU	TMEM206	transmembrane protein 206	0.073442	7.61814	3.19254	0.00258155	0.0163381	-2.35409
ue44A16OnhQh6R_9SU	TIMM23	translocase of inner mitochondrial membrane 23 homolog (yeast)	0.0733006	7.74323	2.76521	0.00823512	0.0400955	-3.42892
E57hdHd957XqF26l10	NA	NA	0.0732718	7.56967	3.79967	0.00043471	0.00412753	-0.669115
uXX0nFqI35qAKInae8	GRIPAP1	GRIP1 associated protein 1	0.0731784	7.541	2.83861	0.0067899	0.0345703	-3.25176
0u9eiDuPahktFxFiRk	HIST2H4B	histone cluster 2, H4b	0.07313	7.55495	3.11292	0.00322516	0.019458	-2.56201
EnBFdJU0QBCHl0RVSg	LILRA1	leukocyte immunoglobulin-like receptor, subfamily A (with TM domain), member 1	0.0731007	7.5377	3.15228	0.00289008	0.0178755	-2.45963
Hr.Uil7.qn9UogI4B4	NRAS	neuroblastoma RAS viral (v-ras) oncogene homolog	0.0729163	7.53707	3.44943	0.00123601	0.00930581	-1.66156
iSunS9eCmnihzqtNCE	TAGLN	transgelin	0.0724387	7.49348	2.96292	0.00486712	0.0266724	-2.94444
KqnEoqxcPIS91ARIEQ	FAM70A	family with sequence similarity 70, member A	0.0722565	7.55265	2.81127	0.00729824	0.0364151	-3.31813
Wp0lRB37XFF0uLjo.g	NA	NA	0.0717087	7.64188	2.90747	0.00565159	0.0299636	-3.08263
oLdYv2iqfouLoZHag8	MAGED2	melanoma antigen family D, 2	0.0715588	7.53252	4.29928	9.14897e-05	0.001195	0.826882
BUIc34npwSP10kpeoI	SCAPER	S-phase cyclin A-associated protein in the ER	0.0714662	7.5478	2.94334	0.00513161	0.0278052	-2.99342
6pX04X56kSAEV26LEc	NDN	necdin homolog (mouse)	0.0714653	7.55343	3.11569	0.00320044	0.0193359	-2.55484
Hepl7oM5SAMOl5OQro	DBR1	debranching enzyme homolog 1 (S. cerevisiae)	0.0704124	7.5772	3.9119	0.000308264	0.00317185	-0.340606
opLIq5393IogH5SiEI	ZUFSP	zinc finger with UFM1-specific peptidase domain	0.0704103	7.57348	3.81994	0.000408657	0.00396248	-0.610115
cXkJSHGV_SOnfDpAXk	NUP98	nucleoporin 98kDa	0.0703978	7.60987	3.65011	0.000682834	0.00584701	-1.09924
opRGSKIDrfOrrieLHg	SIRT5	sirtuin 5	0.070226	7.61977	2.77625	0.0080009	0.0392298	-3.40248
lnkpwSolYfSSXrtF3Q	REC8	REC8 homolog (yeast)	0.0696852	7.62011	2.87813	0.00611285	0.0318278	-3.15502
uS.U7HImHtLuvpLhe4	NA	NA	0.0689705	7.57051	3.08428	0.00349156	0.0206784	-2.63597
ipUX0u7gHYLn60Xg_8	C11orf82	chromosome 11 open reading frame 82	0.0688438	7.59593	3.11963	0.00316557	0.0191841	-2.54462
lUoO6nfLj1IwqQJeqU	NSUN3	NOP2/Sun domain family, member 3	0.0688159	7.59069	2.69995	0.00975393	0.0452627	-3.58369
iZ20ULfyDJ.JtuBVnk	TCF7L2	transcription factor 7-like 2 (T-cell specific, HMG-box)	0.067107	7.51707	4.23986	0.000110517	0.00138601	0.64469
HqHVc9IuyeoI4JXT6A	CHD2	chromodomain helicase DNA binding protein 2	0.066569	7.55831	2.90452	0.00569647	0.0301564	-3.08993
oqEcUQlX3oCjkgCFUk	SLC30A1	solute carrier family 30 (zinc transporter), member 1	0.0659588	7.57961	3.38023	0.00151123	0.0108431	-1.85123
Ko6Z6_kSN8BOiV_0js	GLE1	GLE1 RNA export mediator homolog (yeast)	0.0636995	7.52251	3.16916	0.0027567	0.0172128	-2.41548
o.pLollLfrl7p92zpw	TRO	trophinin	0.0633741	7.54208	3.7464	0.000510998	0.00466088	-0.823321
0dOiBUqhJ65A9IHip0	TJP2	tight junction protein 2 (zona occludens 2)	0.0631465	7.58983	3.22456	0.00235868	0.015238	-2.26956
3DOnEiJXnGbatSukgQ	GALK2	galactokinase 2	0.0625959	7.53147	3.47855	0.00113508	0.00872039	-1.58106
un14uff36J4U7rAFXo	FANCL	Fanconi anemia, complementation group L	0.0622811	7.55082	3.98075	0.000249174	0.00268556	-0.136776
Esk6vpDcSTupQNSXnk	HIBCH	3-hydroxyisobutyryl-CoA hydrolase	0.0618654	7.69316	2.90823	0.00564007	0.0299204	-3.08074
K.XUXnq3eeF_eoEd4o	GNGT2	guanine nucleotide binding protein (G protein), gamma transducing activity polypeptide 2	0.0614977	7.66402	2.6874	0.0100743	0.0463726	-3.61316
Hk3p8VevHigEX0ogko	NFU1	NFU1 iron-sulfur cluster scaffold homolog (S. cerevisiae)	0.0614014	7.65298	3.08111	0.00352232	0.0208258	-2.64414
KA6JUKeIWIUIVIWI6I	SLC26A8	solute carrier family 26, member 8	0.0611148	7.55254	3.31255	0.00183623	0.0125982	-2.03458
NnglJ17X.NQB6su1JQ	NA	NA	0.0609825	7.57196	2.66658	0.0106267	0.048288	-3.66181
9leKni95FS0J0oKUIA	NA	NA	0.0608371	7.51596	3.0682	0.00365013	0.0213533	-2.67732
66Ekq73SdUmCXUQSDo	TTYH2	tweety homolog 2 (Drosophila)	0.0606004	7.51156	2.89261	0.00588108	0.0308661	-3.11937
BHeQIk3nkVCXiWvXvQ	PDLIM5	PDZ and LIM domain 5	0.0604795	7.49697	3.36067	0.00159905	0.0113264	-1.90445
H4kKbSKec_f3ivwu1U	AVL9	AVL9 homolog (S. cerevisiase)	0.0601217	7.49858	3.13727	0.00301382	0.0185292	-2.49878
ECgp1eTtefnkZROrus	MCM4	minichromosome maintenance complex component 4	0.0597525	7.47467	3.1044	0.00330236	0.0198231	-2.58407
9pN1JHikXeHRLx86JE	RPS6KC1	ribosomal protein S6 kinase, 52kDa, polypeptide 1	0.0587461	7.60112	3.20229	0.00251169	0.0160104	-2.32842
Hf0uzdJqx1J_6T1TuE	ZNF295	zinc finger protein 295	0.0586451	7.56723	3.04064	0.00393758	0.0225652	-2.74782
Ntq5IeJhZJVIRxJ6P0	DCTN6	dynactin 6	0.0582057	7.59368	2.79702	0.00757699	0.0374582	-3.35254
E_roki2f4JfvWNw9z4	UPF3B	UPF3 regulator of nonsense transcripts homolog B (yeast)	0.0580986	7.48226	2.6758	0.0103787	0.0473554	-3.6403
rVUQ7jrP6KV7d66.8o	ZNF564	zinc finger protein 564	0.0576845	7.56141	2.77731	0.00797878	0.0391412	-3.39994
N6oTiekQQo33clQDbo	LRRCC1	leucine rich repeat and coiled-coil domain containing 1	0.0573684	7.54831	3.42129	0.00134158	0.00994005	-1.73895
oU3npF4oi4kl6FEJUs	MED24	mediator complex subunit 24	0.0572193	7.51871	2.72643	0.0091089	0.0432081	-3.5212
rsq9f3yNyKCxJRUeE0	TAF5	TAF5 RNA polymerase II, TATA box binding protein (TBP)-associated factor, 100kDa	0.0571446	7.51735	2.64959	0.0110982	0.0498302	-3.70131
KmnQPXQ4xYonp7pylI	TMUB2	transmembrane and ubiquitin-like domain containing 2	0.0558594	7.52818	2.71778	0.0093151	0.0438638	-3.54166
fRUHoLT147nuJIOpeY	CMAHP	cytidine monophospho-N-acetylneuraminic acid hydroxylase, pseudogene	0.0558464	7.59529	2.75388	0.008482	0.0410268	-3.45597
Q9_zXS5esSh_ESLL70	DCAF10	DDB1 and CUL4 associated factor 10	0.0551415	7.61259	3.13031	0.00307282	0.0187892	-2.51687
WktiXqYRAiFFe3jIwc	MSL3	male-specific lethal 3 homolog (Drosophila)	0.0540983	7.52559	3.29525	0.00192937	0.0130628	-2.08107
ins4gohXksfUhXQpbo	RABGGTA	Rab geranylgeranyltransferase, alpha subunit	0.054063	7.48343	3.09426	0.00339641	0.0202442	-2.61024
31LIK5Uh9T8.pd9F4o	RDH14	retinol dehydrogenase 14 (all-trans/9-cis/11-cis)	0.0520284	7.61877	2.72614	0.00911592	0.0432081	-3.52191
KXuYrnnrLhQoroogqQ	JOSD2	Josephin domain containing 2	0.0462911	7.4696	3.02732	0.00408407	0.0232169	-2.78176
xij3cugh0gPpG7ngoE	GMNN	geminin, DNA replication inhibitor	0.0443143	7.43437	3.03939	0.00395116	0.0226284	-2.75102
WTnsFLonPSbn0Lgi5I	BBS7	Bardet-Biedl syndrome 7	0.0427311	7.47966	2.7397	0.00880065	0.0421879	-3.48972
fgzVAKUB6gdyU61KIo	NA	NA	-0.0488425	7.48735	-2.91643	0.00551733	0.0294368	-3.06042
rrblSOOiA2FSCXiiu0	C16orf74	chromosome 16 open reading frame 74	-0.0493797	7.45771	-3.05502	0.00378507	0.0219061	-2.71109
Q_UC1Z5V65Z4UBJLFw	NA	NA	-0.0528046	7.50224	-2.75194	0.00852507	0.0411901	-3.46061
xV_RxOmE0HoiIodqt8	C12orf24	chromosome 12 open reading frame 24	-0.054012	7.5441	-2.7263	0.00911211	0.0432081	-3.52152
QtOh3aR5lSlR1NSNOA	NA	NA	-0.0544944	7.47178	-3.63832	0.000707341	0.0059931	-1.13275
iX06C1_d5uk3tJ.0X8	MAP7	microtubule-associated protein 7	-0.0547228	7.58083	-2.64802	0.0111425	0.0499564	-3.70494
rm4nlOzZSW_f7x4G5Y	PBX4	pre-B-cell leukemia homeobox 4	-0.0562917	7.60735	-2.76215	0.0083011	0.0402949	-3.43623
uiSdXZ5jc_AtI3URCo	NA	NA	-0.0569735	7.50147	-2.83591	0.00683854	0.0347281	-3.25832
QxN.x7irieRqCWNYqk	NA	NA	-0.0587685	7.51382	-3.09103	0.00342701	0.0203779	-2.61859
r6UvkrwlUgC9F_iCdY	SNRPD3	small nuclear ribonucleoprotein D3 polypeptide 18kDa	-0.0594788	7.53902	-3.01458	0.00422896	0.0238644	-2.81414
Nehf.goZv6fIooMFOU	EFHC2	EF-hand domain (C-terminal) containing 2	-0.0596751	7.43974	-4.38991	6.84669e-05	0.000947197	1.10677
HE7eK4IloILapUKiVc	IKBIP	IKBKB interacting protein	-0.0603976	7.49074	-3.3579	0.00161186	0.0113807	-1.91196
riX8jYUfADMXylZ1WY	NA	NA	-0.0645324	7.56662	-2.73723	0.00885731	0.0423677	-3.49559
ueJIehENN3V9dztCR4	NSUN7	NOP2/Sun domain family, member 7	-0.0657641	7.5884	-2.77823	0.00795949	0.039065	-3.39772
0vm6uk4vggpAp_wPxU	NR4A2	nuclear receptor subfamily 4, group A, member 2	-0.0685686	7.57032	-3.26763	0.00208742	0.0138546	-2.155
9JIqlWiEmnj83eTYTc	C16orf79	chromosome 16 open reading frame 79	-0.0713532	7.4863	-4.21114	0.000121044	0.00149578	0.55703
rqrq.8Ddv3foQkSo3Y	PTP4A3	protein tyrosine phosphatase type IVA, member 3	-0.0718531	7.60488	-2.72266	0.00919824	0.0434813	-3.53012
TqJR_eTzQqgpCHqO3I	NA	NA	-0.0722665	7.56907	-3.14964	0.00291153	0.0179893	-2.46654
rdeVd8CWB0IKS74Cu0	NA	NA	-0.0729465	7.50607	-4.1936	0.00012795	0.00156799	0.503597
rt._UgvAp7dQtXgdJI	ERP27	endoplasmic reticulum protein 27	-0.0734879	7.69776	-2.99846	0.00441908	0.0246855	-2.85494
QsW0kF6EiXhHjZB5A0	NA	NA	-0.0743508	7.59558	-3.4144	0.00136874	0.0100655	-1.75786
TCLXXSIUo664T127eU	GTF2IRD2B	GTF2I repeat domain containing 2B	-0.0763082	7.68459	-4.01117	0.000226716	0.00250293	-0.0462046
cwjTtHkdSHiQSLhH8w	NA	NA	-0.0774725	7.59133	-3.51778	0.00101151	0.00798923	-1.47201
N1uDV8it7g_yvCBV5U	SEC62	SEC62 homolog (S. cerevisiae)	-0.0777851	7.68556	-2.99878	0.00441529	0.0246721	-2.85415
NTkDODMXeM6.p3u1UU	NA	NA	-0.0779494	7.53241	-3.54653	0.000929271	0.00744257	-1.39169
fuSNSoBStRRdp6c_fg	EIF2D	eukaryotic translation initiation factor 2D	-0.0790642	7.61794	-3.00383	0.00435489	0.0244116	-2.84137
x_JRky7RkXuNUnHyis	CCNB1IP1	cyclin B1 interacting protein 1, E3 ubiquitin protein ligase	-0.0804437	7.65129	-3.31499	0.00182342	0.0125394	-2.02799
rn8b5dO4ufTJKu4Z6U	NA	NA	-0.0814571	7.79022	-3.32754	0.00175896	0.0121861	-1.99415
3XvEjhMkXpxRJPuSKU	NA	NA	-0.0831987	7.84047	-3.16485	0.00279019	0.0173974	-2.42677
Bgl6UVEd5OV0VR9.hw	FUZ	fuzzy homolog (Drosophila)	-0.0834284	7.54341	-4.8797	1.38716e-05	0.000265843	2.65531
ZHhO7uXi5SUW7gd.oo	NA	NA	-0.0837441	7.70705	-3.90569	0.000314212	0.00322367	-0.358892
W1ASS5ebVnUaLfUgRc	RFX2	regulatory factor X, 2 (influences HLA class II expression)	-0.0864921	7.48925	-3.84918	0.000373735	0.00369314	-0.524784
WuS53iqEhCn6uzOUFI	MOAP1	modulator of apoptosis 1	-0.0873615	7.83116	-2.82359	0.00706493	0.0355212	-3.28827
WgA1K5aKJIKOIDHolo	DBP	D site of albumin promoter (albumin D-box) binding protein	-0.0876586	7.66044	-3.39195	0.00146085	0.0105501	-1.81928
QIoIq6yKKwhLKgIQqU	CBX1	chromobox homolog 1	-0.0885266	7.76281	-2.64803	0.0111425	0.0499564	-3.70494
uBEr6SlLdpLYiUlDI4	LRRC14	leucine rich repeat containing 14	-0.0890737	7.6664	-2.84215	0.00672643	0.034336	-3.24312
QykYVN7r16_unDguKo	PHF13	PHD finger protein 13	-0.0905571	7.89151	-4.41265	6.36455e-05	0.000891642	1.17735
cr0RN_3uuicofgdKSU	NA	NA	-0.090976	7.82681	-2.6663	0.0106342	0.0483096	-3.66245
u2qF1AhwHhCX0KJUqs	TARDBP	TAR DNA binding protein	-0.0915009	7.71863	-3.15518	0.00286677	0.0177934	-2.45207
65IRFMlV9xx.V3ZXlE	TP53INP2	tumor protein p53 inducible nuclear protein 2	-0.0930456	7.58275	-4.0927	0.000175769	0.00204233	0.198164
9IUtHV3l9Kfe0P0800	NA	NA	-0.0931451	7.86116	-2.74609	0.00865582	0.0416288	-3.47454
9nUnunEGyr.zEIAMC4	NA	NA	-0.0934087	7.57904	-3.80493	0.000427791	0.00408153	-0.653801
WXaqXqgvu77ktLANdU	ZNF358	zinc finger protein 358	-0.0969227	7.83895	-2.85192	0.00655445	0.0336424	-3.21928
xnq.JWKet8jkmHv0i4	NA	NA	-0.0977353	7.82395	-3.62977	0.000725648	0.00611021	-1.15702
oRXtR_rjT1IVdVATkw	NA	NA	-0.0977361	7.61735	-4.27133	0.000100002	0.00128321	0.741078
xrxZO2euCKK.lEqOxc	FCHO1	FCH domain only 1	-0.0997683	7.6219	-2.81571	0.00721329	0.0360914	-3.30737
fN9L59KU3o7MTkrRKg	GSDMB	gasdermin B	-0.100263	7.69481	-3.02607	0.00409804	0.0232814	-2.78493
HtULP1JKCw7fXSXQUo	HSPBAP1	HSPB (heat shock 27kDa) associated protein 1	-0.100673	7.84434	-2.71793	0.0093115	0.0438638	-3.5413
BQXpPEvpd1_K6kSXpI	FOXO1	forkhead box O1	-0.101542	7.96267	-2.75989	0.00835021	0.0404557	-3.44163
9TNQvR3t9eJLoI0z54	TRAF5	TNF receptor-associated factor 5	-0.101753	7.82731	-2.67803	0.0103194	0.0471576	-3.63508
fe56o_mWK6biPUfuyA	TNPO2	transportin 2	-0.102246	8.22655	-2.79508	0.00761565	0.0376068	-3.35721
HffXKpduN4quuXH1Hs	PPP3CA	protein phosphatase 3, catalytic subunit, alpha isozyme	-0.1029	7.68719	-3.57641	0.00085056	0.00694408	-1.30778
lLRS6eSCpRXJf8Hn_0	C16orf48	chromosome 16 open reading frame 48	-0.10527	7.73271	-2.8011	0.00749614	0.0371473	-3.3427
i1GgEgdjkeF51lKAuI	PRKCZ	protein kinase C, zeta	-0.106301	7.76084	-2.99244	0.00449222	0.0250152	-2.87017
oRRkvlLuPJlwq3U.JI	NA	NA	-0.106471	7.56653	-3.46908	0.00116702	0.00890755	-1.60729
WJykPXh50SvlXh3p6I	PPOX	protoporphyrinogen oxidase	-0.106501	7.72553	-4.16644	0.000139407	0.00167705	0.421049
6iEdgtIKeqSNH0JCVU	NA	NA	-0.107113	7.7678	-2.82594	0.0070212	0.0353717	-3.28256
lUqoq5I4qJhUjyuKEs	IL25	interleukin 25	-0.10726	7.63145	-4.236	0.000111879	0.00140011	0.632886
QpKIH3UhF0jAtaJUKc	PCBP2	poly(rC) binding protein 2	-0.10756	7.76169	-2.9508	0.0050293	0.0274027	-2.97479
KW2iFI4XvI6ctezB2E	ABCC5	ATP-binding cassette, sub-family C (CFTR/MRP), member 5	-0.108173	7.64268	-3.30595	0.00187126	0.0127742	-2.05234
iIddSFKBVIKISJeUTU	FAM102A	family with sequence similarity 102, member A	-0.108797	7.63016	-3.48812	0.00110367	0.00853811	-1.55452
flXFECqUjW9C4oJH5I	SLC35E1	solute carrier family 35, member E1	-0.109813	7.77764	-4.51684	4.54787e-05	0.000678464	1.50252
0kIqEolSCIR4oQiNEU	C7orf49	chromosome 7 open reading frame 49	-0.110979	7.67778	-4.16616	0.000139529	0.00167738	0.420203
ZqKJpxpLGaIIKUIJeQ	EEF1D	eukaryotic translation elongation factor 1 delta (guanine nucleotide exchange protein)	-0.111467	7.69433	-2.76396	0.00826199	0.040199	-3.43191
frnd.e33Eji0Rf4nw0	SIAH1	seven in absentia homolog 1 (Drosophila)	-0.111685	7.76814	-3.5813	0.000838308	0.00687238	-1.29402
ltV.93dKkVSVRHROxg	TIMM17B	translocase of inner mitochondrial membrane 17 homolog B (yeast)	-0.111779	7.8109	-3.48597	0.00111065	0.00857715	-1.56048
6uVd7N.4guaDK_fcUU	C20orf11	chromosome 20 open reading frame 11	-0.113437	8.12564	-2.85703	0.00646604	0.0333335	-3.20677
0JKeqmnnvi3v.HtyeU	RAB2A	RAB2A, member RAS oncogene family	-0.113683	7.88238	-3.22754	0.00233888	0.0151448	-2.26166
ZidJRcRFFulhH9PCC8	NA	NA	-0.114627	7.72572	-3.4773	0.00113926	0.00873332	-1.58453
0yleB.dSUJ3ipUXXl0	NA	NA	-0.114749	7.56643	-4.29188	9.36705e-05	0.00121712	0.804157
3odrckKU375aF.eBQE	AHCTF1	AT hook containing transcription factor 1	-0.114863	7.71115	-3.76227	0.000487026	0.00448946	-0.777518
KnJkIUtHV3l9Kfe0P0	RPA1	replication protein A1, 70kDa	-0.115154	7.97467	-2.68246	0.0102028	0.046794	-3.62472
xOVOdXcXR5RR157yic	DAPK2	death-associated protein kinase 2	-0.115384	7.66765	-2.99479	0.00446355	0.0248868	-2.86423
6U3Wob3ad5dPu5IB7o	NA	NA	-0.115813	8.17469	-3.00338	0.00436026	0.024434	-2.84251
i3.WIAQQOmjhlrkmqo	NA	NA	-0.116579	7.66035	-3.03182	0.004034	0.0229913	-2.7703
T1eXBX9e3ZfoJFTt1c	NA	NA	-0.11658	7.91321	-3.78244	0.000458092	0.00429191	-0.719105
uQElXVRdS.xBDSAqR4	CDK13	cyclin-dependent kinase 13	-0.117252	7.84215	-6.1574	1.86192e-07	7.44265e-06	6.87593
r3hUUE4eOdAoDpR6CM	LYRM7	Lyrm7 homolog (mouse)	-0.118355	7.74474	-3.83138	0.000394633	0.00384934	-0.576765
3RSV_0DjtU3wU7kP7U	RNF103	ring finger protein 103	-0.11839	7.94184	-3.39654	0.00144153	0.0104532	-1.80673
uRl_S4fdt6i6keLXdI	CYB561D1	cytochrome b-561 domain containing 1	-0.118618	7.90026	-3.0861	0.003474	0.0205951	-2.63128
NVr0.zm5iC0usHnkqc	NPEPPS	aminopeptidase puromycin sensitive	-0.118933	8.32102	-2.94858	0.00505953	0.0274998	-2.98033
QFOGA8mS6f6ocmNep0	DPM3	dolichyl-phosphate mannosyltransferase polypeptide 3	-0.119107	7.7698	-3.3452	0.00167194	0.0117161	-1.94641
BpQH6JK7U1SV7svIko	HLA-DOA	major histocompatibility complex, class II, DO alpha	-0.121248	7.78514	-3.09792	0.00336216	0.0201139	-2.60079
TbinVSUSVXfH5fAHog	RNF216	ring finger protein 216	-0.121743	8.01992	-2.76825	0.00817001	0.0398114	-3.42165
NXXsGHoJFKcIF4Vdoc	C2orf89	chromosome 2 open reading frame 89	-0.121838	7.85205	-2.69645	0.00984232	0.0455774	-3.59192
lUZOFRHhRFeV32uE98	NECAB2	N-terminal EF-hand calcium binding protein 2	-0.121979	7.48412	-6.48517	6.07824e-08	3.02341e-06	7.97776
6nU3Hf4J95Un5Pv3KI	SNRPN	small nuclear ribonucleoprotein polypeptide N	-0.122811	8.28165	-2.92525	0.00538808	0.0288865	-3.03852
xyHx56EN5OpNFXVZOw	NA	NA	-0.122872	7.72936	-3.03424	0.00400731	0.0228613	-2.76414
HpSYoruoTDJeLn6vFM	ARHGAP19	Rho GTPase activating protein 19	-0.122924	7.89103	-3.13911	0.00299836	0.0184678	-2.49398
9oJYSIxcSGi.7lV65Q	NA	NA	-0.123752	7.52222	-4.67156	2.74936e-05	0.000458865	1.99043
3lEtw7T0fT_Oq0fvJ4	SPAG9	sperm associated antigen 9	-0.123956	7.96027	-3.08137	0.00351975	0.0208176	-2.64346
Zj_jT5UC_RkeXXxe4o	OCIAD2	OCIA domain containing 2	-0.124122	7.55651	-3.79494	0.000441003	0.00416939	-0.68283
HSKSgCQolIPCK_rS3k	PPIA	peptidylprolyl isomerase A (cyclophilin A)	-0.124207	7.59381	-4.24371	0.000109174	0.00137501	0.656474
uQl0f97l9eKq_paooA	DGAT2	diacylglycerol O-acyltransferase 2	-0.124563	7.70474	-2.77868	0.00795022	0.0390333	-3.39665
3lMXrtQIHTiX7t6nnk	PASK	PAS domain containing serine/threonine kinase	-0.124796	7.7539	-2.66753	0.0106009	0.0481827	-3.65959
6pX7yi6c_j3Ca_qTio	TRIM66	tripartite motif containing 66	-0.125138	7.97157	-3.20263	0.00250926	0.0160007	-2.32751
Qp5V34FFROfJVJ._gg	TSPAN18	tetraspanin 18	-0.125345	7.60694	-3.12279	0.00313785	0.0190974	-2.53642
Hl_fyRKzglIJSTdB7k	POLR1E	polymerase (RNA) I polypeptide E, 53kDa	-0.125765	7.71266	-5.55252	1.45742e-06	4.11611e-05	4.85593
lVFdRXSspVLO89f7tQ	VPS24	vacuolar protein sorting 24 homolog (S. cerevisiae)	-0.125961	7.90064	-3.15331	0.00288178	0.017846	-2.45695
0jOJ3JZUJyQ6QV96tU	UBA52	ubiquitin A-52 residue ribosomal protein fusion product 1	-0.126427	7.74287	-3.70664	0.000576199	0.00511958	-0.937709
xJV.X6euOCISLtIslU	TRPT1	tRNA phosphotransferase 1	-0.127039	8.23287	-2.93848	0.00519945	0.0280878	-3.00557
xL515VdXgc.7nuzNHk	SSBP2	single-stranded DNA binding protein 2	-0.127092	7.908	-4.19115	0.000128947	0.00157693	0.496127
i6X_oCNIikiukShLAo	B4GALT1	UDP-Gal:betaGlcNAc beta 1,4- galactosyltransferase, polypeptide 1	-0.127774	7.80831	-4.37754	7.12384e-05	0.000974971	1.06843
xH031ULmqLEKTpsirk	CXCR3	chemokine (C-X-C motif) receptor 3	-0.128546	7.66595	-3.61068	0.000768157	0.00638207	-1.21109
9qV056f9FUihEpJ9QA	MFGE8	milk fat globule-EGF factor 8 protein	-0.128639	7.87253	-2.71471	0.00938948	0.0440564	-3.54892
QNdoIUVUogEJ_FHOc0	RPL23AP32	ribosomal protein L23a pseudogene 32	-0.129033	7.56184	-4.43969	5.8343e-05	0.000825849	1.26146
QgfoiTSgpUngNIg3nY	ITGAE	integrin, alpha E (antigen CD103, human mucosal lymphocyte antigen 1; alpha polypeptide)	-0.129179	7.81194	-4.40517	6.51934e-05	0.000911163	1.15412
0Z19P0rx299JC_kASE	DEXI	Dexi homolog (mouse)	-0.130067	7.99046	-2.94483	0.00511108	0.0277204	-2.98971
xoire6Sf3oePfbtGeI	NA	NA	-0.130558	7.61463	-4.23492	0.000112263	0.00140194	0.62959
B1lTjnlQacbcacQ93k	MAEA	macrophage erythroblast attacher	-0.13062	8.18749	-2.8328	0.00689511	0.0349153	-3.2659
EcelUYjVALfYV4goio	NSMCE1	non-SMC element 1 homolog (S. cerevisiae)	-0.131851	7.98921	-3.47854	0.00113511	0.00872039	-1.58108
ZLhThgPJkun_qHJjXo	DPM3	dolichyl-phosphate mannosyltransferase polypeptide 3	-0.131915	7.76145	-3.58974	0.000817563	0.00671493	-1.27025
ZFYTQJ6buF.UlOYz1U	STRA13	stimulated by retinoic acid 13 homolog (mouse)	-0.132327	7.94126	-3.29699	0.00191983	0.0130197	-2.07642
o_l7siVXXuV0untv7w	ARIH2	ariadne homolog 2 (Drosophila)	-0.132377	8.1586	-3.80752	0.000424432	0.00406168	-0.646276
ZoF6LQAgefS1WexZeU	WIPI2	WD repeat domain, phosphoinositide interacting 2	-0.132688	7.82258	-3.48975	0.0010984	0.00851417	-1.54999
l0F0Uqe3frURdnV7y4	SURF4	surfeit 4	-0.132863	8.26808	-2.68522	0.0101308	0.0465359	-3.61826
BVBlCBBaheh9FNheh8	NA	NA	-0.133141	8.19484	-3.12054	0.00315754	0.0191616	-2.54225
3XUP9UDkNLsHKp7v3k	KPNA1	karyopherin alpha 1 (importin alpha 5)	-0.133331	7.95257	-3.90164	0.00031816	0.00325465	-0.370842
KtF_5iBdBZFzfqBasw	REPS2	RALBP1 associated Eps domain containing 2	-0.133846	7.66496	-4.13572	0.000153566	0.00182139	0.327987
xLpHYYAohzlLxxSpc4	SKAP1	src kinase associated phosphoprotein 1	-0.133956	7.80498	-3.19173	0.00258746	0.0163639	-2.35623
0H6ylikog2fAVuK6K8	HSCB	HscB iron-sulfur cluster co-chaperone homolog (E. coli)	-0.134117	7.762	-3.41026	0.00138528	0.0101634	-1.76919
QUXlLvPznV9urjpRlc	CRIP2	cysteine-rich protein 2	-0.13484	7.56475	-4.54399	4.16485e-05	0.000631431	1.58773
ZoOoiqC36SoDV.6URI	ATP8B2	ATPase, class I, type 8B, member 2	-0.135793	8.1192	-3.01212	0.00425748	0.0239907	-2.82037
fiReU.5fk2.V205P1E	CETN2	centrin, EF-hand protein, 2	-0.136089	8.24874	-3.84779	0.000375325	0.00370211	-0.52884
o3kq6E6Oz2.eNOIIp0	CAPS2	calcyphosine 2	-0.136361	7.80999	-4.28178	9.67313e-05	0.0012503	0.773143
cR4NJTsmje0vxJdgok	GMCL1	germ cell-less homolog 1 (Drosophila)	-0.13685	7.6768	-3.25586	0.00215848	0.0142143	-2.18641
rDrnu1ntRIAZXwslcU	NA	NA	-0.137021	7.77954	-3.99406	0.000239098	0.0026039	-0.0972002
fKCOX_eVDmCvOqKGYo	NA	NA	-0.137912	8.00975	-3.1361	0.00302361	0.0185717	-2.50181
uQpJLiU40RR5H0F6qE	RNF213	ring finger protein 213	-0.137981	7.82216	-2.79029	0.00771208	0.0380617	-3.36876
xjEtHB9N7VblX1SteU	C19orf53	chromosome 19 open reading frame 53	-0.138238	8.07736	-3.2677	0.00208703	0.0138546	-2.15483
T4Yioo7RrS_wf5fRCk	PIK3R1	phosphoinositide-3-kinase, regulatory subunit 1 (alpha)	-0.139111	7.97306	-4.51347	4.59775e-05	0.000683029	1.49195
uIrfrUququK6rcX_AQ	NA	NA	-0.140757	7.80499	-3.36819	0.00156472	0.0111378	-1.88401
cUeR17erhKiI1fd_gg	NA	NA	-0.140772	7.84793	-3.10496	0.00329721	0.0198056	-2.58261
QinXreoLAiwF6pLq0o	FAM134A	family with sequence similarity 134, member A	-0.141013	7.91673	-3.12221	0.00314295	0.0190993	-2.53793
Bun_X6_4jqxPcCiSVo	NA	NA	-0.141142	8.37072	-2.67137	0.0104971	0.0478217	-3.65063
0576touUtHn_gt7veo	NA	NA	-0.141993	7.9211	-4.12258	0.000160041	0.00188557	0.288268
TKliluidOikCeKMKLo	NA	NA	-0.143106	7.51504	-6.44297	7.02067e-08	3.45339e-06	7.8358
ZQrSiiQA4lJFJl_n_4	NA	NA	-0.144009	7.86072	-4.17618	0.000135185	0.00163963	0.450642
TkNHF.dv0.uwU5JMpE	ANAPC16	anaphase promoting complex subunit 16	-0.144294	7.87186	-3.44333	0.00125819	0.0094447	-1.67836
HSV3JIm0uS27zVp.xI	TMCO3	transmembrane and coiled-coil domains 3	-0.145201	7.68114	-4.39357	6.76682e-05	0.000939819	1.11811
rdd9atbqYt9NwqFCMc	KRT10	keratin 10	-0.146081	8.05298	-3.71389	0.000563737	0.00502398	-0.916891
cXuAVLt8hB7p_JFF54	EEF1A1	eukaryotic translation elongation factor 1 alpha 1	-0.146769	7.75034	-4.81173	1.73582e-05	0.000312695	2.43719
iLomllojl4ZN7eKJrQ	SNURF	SNRPN upstream reading frame	-0.14678	8.34945	-2.81093	0.00730473	0.0364372	-3.31894
NauQlbu3pd.Xbghju0	C7orf26	chromosome 7 open reading frame 26	-0.147574	8.21379	-3.25146	0.00218559	0.0143502	-2.19812
HdKfX0RdfdOrmnpLEs	NA	NA	-0.1478	7.82247	-3.60938	0.000771145	0.00640199	-1.21477
cSVTU715AoTjf3_kFE	VPS24	vacuolar protein sorting 24 homolog (S. cerevisiae)	-0.148466	7.88302	-3.29427	0.00193479	0.0130768	-2.08371
Tc56SFcOiHRecO_OeY	UBE2G1	ubiquitin-conjugating enzyme E2G 1	-0.148958	8.10817	-3.38301	0.00149912	0.0107696	-1.84365
0e6Eq5J3FL17994lIU	APPL2	adaptor protein, phosphotyrosine interaction, PH domain and leucine zipper containing 2	-0.150877	7.94471	-4.18557	0.000131238	0.00160053	0.479167
rnrrh5EYTo1T4nh7.U	NA	NA	-0.151103	7.60825	-4.82957	1.63671e-05	0.000298793	2.49437
l2UvlQjSq1p7X3teeQ	P4HTM	prolyl 4-hydroxylase, transmembrane (endoplasmic reticulum)	-0.151146	7.88083	-4.32865	8.33028e-05	0.00110414	0.917349
N_IpYp6StH4pSi9CFI	GSTTP2	glutathione S-transferase theta pseudogene 2	-0.151553	7.75888	-3.37983	0.00151298	0.0108504	-1.85233
9YWnbPWNLZ9T7yTbEY	NA	NA	-0.152211	7.91811	-3.69679	0.000593545	0.00523431	-0.965943
KX0oh_NUsh4rfV.SSA	CYFIP2	cytoplasmic FMR1 interacting protein 2	-0.15301	8.05213	-4.15944	0.000142518	0.00170751	0.399809
TA8nq7jpR_op4jKINk	NA	NA	-0.153213	8.22671	-2.85575	0.00648819	0.0334002	-3.20992
ECCG5e.VfZfeW4_0v0	PMS2P4	postmeiotic segregation increased 2 pseudogene 4	-0.153289	8.24432	-3.75837	0.000492807	0.00453567	-0.788769
ci3v57w.f7qpJKJd0k	BRP44	brain protein 44	-0.153961	7.93613	-4.54509	4.15002e-05	0.000630263	1.59118
xeekuIpwDpQfCUCewE	NA	NA	-0.154285	7.7076	-3.97711	0.000252005	0.00271282	-0.147603
ZAf9xXi5iMIGOroIiQ	NA	NA	-0.155735	7.82953	-3.53291	0.000967404	0.00770962	-1.42979
fUhCMoCqAVSAbnfTe0	ZNF398	zinc finger protein 398	-0.156166	7.77047	-4.12852	0.000157082	0.00186061	0.306214
HRe5_O0n0HmGIlx6XU	WDR13	WD repeat domain 13	-0.156478	8.19152	-3.50551	0.00104872	0.0082135	-1.5062
NpqHpVkVRllVea5kWQ	NA	NA	-0.156725	7.90855	-3.50223	0.00105887	0.00826483	-1.51531
9xBWx.ghRSFed0mlRg	NA	NA	-0.15695	7.77879	-3.59721	0.000799604	0.00659497	-1.24917
f9xeS0CutZkCiZejig	PAM16	presequence translocase-associated motor 16 homolog (S. cerevisiae)	-0.157676	7.85922	-4.65455	2.90647e-05	0.000478771	1.9365
lx56b6Er.B9p9hcfsE	GMCL1	germ cell-less homolog 1 (Drosophila)	-0.157724	7.77951	-3.95843	0.000267016	0.00283472	-0.203051
Qkj0tRIXfnlXS4Qs54	ZBTB34	zinc finger and BTB domain containing 34	-0.158293	8.31684	-3.36982	0.00155741	0.0111025	-1.8796
ckhlexDQjRUQgUjlTk	DGKA	diacylglycerol kinase, alpha 80kDa	-0.159439	8.04164	-2.65901	0.0108345	0.0489431	-3.67944
lktAuXEEXlJUuAB6oo	PHF17	PHD finger protein 17	-0.159464	8.12386	-3.23194	0.00230991	0.0149941	-2.24998
H3q6RqorTiAbo8RVfs	SNHG13	small nucleolar RNA host gene 13 (non-protein coding)	-0.16005	7.67203	-6.51224	5.54147e-08	2.79568e-06	8.06883
cp0KoBc7LOwRKGdEoo	NA	NA	-0.160485	7.70748	-6.13009	2.04386e-07	8.00722e-06	6.78424
QQEinmvQIVERkQhWuc	PTP4A3	protein tyrosine phosphatase type IVA, member 3	-0.16061	7.71513	-3.24138	0.002249	0.0146818	-2.22493
rOTSdl6h6d7jACFXVk	KLHL22	kelch-like 22 (Drosophila)	-0.161722	8.25191	-3.32956	0.00174881	0.0121307	-1.98871
iGUU6p3ibXg98Sr64I	NA	NA	-0.161782	7.59266	-4.78502	1.89534e-05	0.000338076	2.35172
3Ztd.fqgvii5X0iUsk	SHMT2	serine hydroxymethyltransferase 2 (mitochondrial)	-0.162715	8.30142	-3.58374	0.000832246	0.0068292	-1.28714
W16p67dKJKre7cSOp4	LMAN2	lectin, mannose-binding 2	-0.162895	7.83027	-3.59172	0.000812759	0.00667858	-1.26466
0R4XmVHt6R1cuI4F6w	NA	NA	-0.163661	8.19299	-3.05939	0.00373978	0.0217199	-2.6999
3SHFFf1ULMG0pULuhE	MRVI1	murine retrovirus integration site 1 homolog	-0.163675	7.60176	-4.06242	0.000193236	0.00220337	0.107153
Qp9WAlX7nu6IXQ7pE4	APEX1	APEX nuclease (multifunctional DNA repair enzyme) 1	-0.164148	8.25351	-3.48968	0.00109865	0.00851417	-1.55021
cnVKVCd7uFSIDAjl0s	DGCR6	DiGeorge syndrome critical region gene 6	-0.164439	8.14599	-2.797	0.0075773	0.0374582	-3.35258
0RbvfUTd7Ya4tfqWTc	NA	NA	-0.164599	7.75672	-3.31946	0.00180024	0.0124041	-2.01597
cSokt9TTng.7fUonlU	RAF1	v-raf-1 murine leukemia viral oncogene homolog 1	-0.164629	8.72081	-2.88344	0.00602691	0.0314543	-3.14196
ccklKrX8YSF.FRBXdc	OXA1L	oxidase (cytochrome c) assembly 1-like	-0.164688	8.45999	-2.83233	0.00690365	0.0349385	-3.26704
35Hnk9SUq4SLiFO.QE	RAD51	RAD51 homolog (S. cerevisiae)	-0.165226	7.72587	-4.19491	0.000127424	0.0015637	0.507568
iqKTqWqkvd10fsB_7I	PBX2	pre-B-cell leukemia homeobox 2	-0.165725	8.34908	-3.10284	0.00331664	0.0198953	-2.58809
leuCCeV6n7bXKt1ITs	IKBIP	IKBKB interacting protein	-0.166128	7.68386	-5.22118	4.45012e-06	0.000101944	3.76389
W9xeVx9iC42aZJuhV8	TMEM134	transmembrane protein 134	-0.167866	7.87762	-4.37751	7.12454e-05	0.000974971	1.06834
T8z7Agmpq5V55X7V_o	KDM4B	lysine (K)-specific demethylase 4B	-0.168043	7.82181	-4.23703	0.000111514	0.00139715	0.63604
Hgrpqkoy97rkv48Aik	NA	NA	-0.16907	7.90213	-3.9434	0.000279719	0.00294052	-0.247571
0uw0VAFVaXuXv9X3mc	JMJD7-PLA2G4B	JMJD7-PLA2G4B readthrough	-0.16967	8.26225	-2.74419	0.00869872	0.0418124	-3.47907
iVquuCyeiVjRLVmv7Q	FAM3A	family with sequence similarity 3, member A	-0.171387	8.59909	-3.11281	0.00322615	0.019458	-2.5623
9JN578Up30giw67H14	LYPLAL1	lysophospholipase-like 1	-0.171825	7.92586	-3.84183	0.000382228	0.00375818	-0.546254
rrUXVUoObUUIXyTHvg	SNRPN	small nuclear ribonucleoprotein polypeptide N	-0.172947	8.27123	-2.84143	0.0067393	0.0343836	-3.24488
upZIJiOOCoG00.oCT4	NA	NA	-0.172996	7.61883	-4.36742	7.35866e-05	0.00100082	1.0371
lW1a_n_VzZRJNVH6eA	NA	NA	-0.173168	7.60551	-6.2872	1.19531e-07	5.23925e-06	7.31195
c7i4oKf4jr9JXJRR4U	NA	NA	-0.173259	8.20167	-3.17807	0.0026887	0.0168976	-2.39213
0uPXSkHX_e4enOF_aI	WDR54	WD repeat domain 54	-0.173319	7.96247	-4.07546	0.000185518	0.00213599	0.146303
0VSdUlXUCPx.VNbh14	C19orf70	chromosome 19 open reading frame 70	-0.173387	8.19004	-2.98211	0.00462019	0.025623	-2.89621
Hnv7pKBV6e5AwOqeKU	CYB5R1	cytochrome b5 reductase 1	-0.173843	8.02604	-3.88819	0.000331597	0.00336692	-0.410413
QXeUALqp7Hqh52jjf0	CERS2	ceramide synthase 2	-0.173899	8.38433	-3.607	0.000776641	0.00644158	-1.22152
WSp9200fkm7ifUDCWU	LOC100129550	hypothetical LOC100129550	-0.173935	7.80874	-4.64437	3.00466e-05	0.000491743	1.90426
WBQjRlHk8SXrkiQh3s	TMEM156	transmembrane protein 156	-0.17421	7.9008	-3.42333	0.00133365	0.00989787	-1.73335
EWeVNwX2wIXt179SWU	GNG7	guanine nucleotide binding protein (G protein), gamma 7	-0.174588	7.77537	-4.36919	7.31696e-05	0.000996682	1.04259
ZsgSnelRUzeiSzxhWI	MAPK1	mitogen-activated protein kinase 1	-0.175542	8.27136	-3.83025	0.000395998	0.0038593	-0.580064
ToESkBW4.651_wdJXk	BCL11B	B-cell CLL/lymphoma 11B (zinc finger protein)	-0.175661	8.43346	-2.95277	0.00500257	0.0272991	-2.96986
ZVKVCd7uFSIDAjl0uk	DGCR6	DiGeorge syndrome critical region gene 6	-0.175724	8.12459	-3.42424	0.00133015	0.00987599	-1.73087
Wv0m2AulIDgiF99QNE	SULF2	sulfatase 2	-0.175839	7.85134	-2.89486	0.00584571	0.0307528	-3.1138
BsgTKHnDdL2d7jtC5I	RAPGEF2	Rap guanine nucleotide exchange factor (GEF) 2	-0.176183	8.03958	-3.30513	0.00187563	0.0127843	-2.05453
NFN_lLhC72ipJIihQk	COPS3	COP9 constitutive photomorphogenic homolog subunit 3 (Arabidopsis)	-0.176381	8.53394	-3.18484	0.00263807	0.0166245	-2.37435
Hp4rv_K5Ngu9QnuHxc	RBPJ	recombination signal binding protein for immunoglobulin kappa J region	-0.176821	8.08061	-3.55868	0.000896463	0.00722228	-1.35762
Tv67vVkBVf7nuqesnQ	ABCC5	ATP-binding cassette, sub-family C (CFTR/MRP), member 5	-0.176965	7.7626	-4.03533	0.000210284	0.0023538	0.025989
l94e1KJw3hb3Pu6OFE	MAP2K4	mitogen-activated protein kinase kinase 4	-0.177484	7.8896	-4.17457	0.000135877	0.0016469	0.445728
raL1IUl6kEgQqdN3HI	NA	NA	-0.1779	7.80253	-3.44402	0.00125567	0.00942974	-1.67646
K7Bx5JlPoXGefineh4	NA	NA	-0.178084	7.63353	-5.02817	8.47829e-06	0.000174371	3.13487
6UL1R645e3hG.6z8so	SLC35E1	solute carrier family 35, member E1	-0.178575	7.9236	-5.21351	4.56595e-06	0.000103659	3.73879
x644q3stUjHQiniuoo	NA	NA	-0.179943	7.79981	-5.16462	5.37798e-06	0.000118893	3.57895
Tep3ll7irf3uudSlBQ	NLRP12	NLR family, pyrin domain containing 12	-0.180907	7.72407	-5.2912	3.51826e-06	8.43049e-05	3.99349
iHgcoPvJqv_Cjux.X0	KBTBD7	kelch repeat and BTB (POZ) domain containing 7	-0.18091	7.77871	-3.20603	0.00248534	0.0158882	-2.31855
l.3_ISrf3eR1JcpBIk	ICA1L	islet cell autoantigen 1,69kDa-like	-0.181171	7.87253	-3.75129	0.000503492	0.00461321	-0.809217
0V5eeeqiOe1O.cqs9M	C19orf56	chromosome 19 open reading frame 56	-0.181846	9.33177	-3.07413	0.00359088	0.0211043	-2.66209
czuSYV_u.V9drp3qs4	SRF	serum response factor (c-fos serum response element-binding transcription factor)	-0.181966	8.48433	-3.38301	0.00149916	0.0107696	-1.84368
T5qWZSkUHS7_0u.v.U	LY9	lymphocyte antigen 9	-0.182152	7.70979	-4.51556	4.56667e-05	0.000680125	1.49852
KilNXgiX6Bumre51.w	CCNJL	cyclin J-like	-0.182215	7.74925	-4.62092	3.24337e-05	0.000518822	1.83011
0lOwqJTfoJI11JdS0I	CD96	CD96 molecule	-0.182367	8.07026	-3.43525	0.00128819	0.00962096	-1.70061
NhcK0.n9DyKdSLfTLo	KLHL24	kelch-like 24 (Drosophila)	-0.182588	8.1259	-3.45186	0.00122725	0.00924769	-1.65484
uVUDnxOov4ryz.R9fo	HAL	histidine ammonia-lyase	-0.183334	7.9753	-3.19299	0.0025783	0.0163293	-2.35291
l4pUCR_fE13jJ79A7k	NOV	nephroblastoma overexpressed gene	-0.184017	7.74196	-3.22964	0.00232501	0.0150756	-2.25609
QieqL0IUl6kEw4j9J0	RUNDC2C	RUN domain containing 2C	-0.184637	7.91773	-3.05536	0.00378151	0.0218976	-2.71022
933K44v3H13r.xBKA4	IDS	iduronate 2-sulfatase	-0.184764	7.5766	-4.70135	2.49411e-05	0.000422793	2.08501
ZbJ5tv2M0RXe7ll8fU	NA	NA	-0.185466	9.27601	-2.70689	0.00958087	0.0446704	-3.56735
ZX0RVdEh1_7UGoMoIM	C17orf90	chromosome 17 open reading frame 90	-0.185805	8.28446	-2.76287	0.00828552	0.040243	-3.43451
Nfqh3KOn296Vp0feic	NA	NA	-0.185815	8.27995	-3.15634	0.00285751	0.0177484	-2.44904
0lzjRfk6EkNewE0SLo	KLHDC2	kelch domain containing 2	-0.186784	7.9234	-3.34983	0.00164981	0.011584	-1.93387
Wo9eLx7.vXVR59U9eI	FNIP1	folliculin interacting protein 1	-0.187009	8.10956	-3.9638	0.000262615	0.00279975	-0.187127
lKLk0G595LGnlWGLuw	AGAP8	ArfGAP with GTPase domain, ankyrin repeat and PH domain 8	-0.187332	7.96838	-3.39236	0.00145909	0.010546	-1.81815
H4bu.e4E4L3msuXUqk	RPA2	replication protein A2, 32kDa	-0.187781	8.82366	-3.0684	0.00364809	0.0213531	-2.6768
TW5RfpUmdMXVEDdctw	C12orf10	chromosome 12 open reading frame 10	-0.187958	8.39138	-2.84141	0.00673964	0.0343836	-3.24492
uo5XRPrn910105Vf5Q	NLRX1	NLR family member X1	-0.189064	7.83391	-4.39601	6.71398e-05	0.000934679	1.12569
TASKea9AhURGRCFa54	PTP4A3	protein tyrosine phosphatase type IVA, member 3	-0.190055	7.63571	-3.9433	0.000279804	0.00294052	-0.247864
H6QBIzTnri5RvHVeno	NA	NA	-0.190169	8.30007	-4.2814	9.68483e-05	0.0012509	0.771977
rSXVW1UE5N0d6u3638	FSCN1	fascin homolog 1, actin-bundling protein (Strongylocentrotus purpuratus)	-0.19022	7.98713	-5.3355	3.03142e-06	7.47638e-05	4.1391
ZXSYrSYhRIiRI7QoSc	NAA10	N(alpha)-acetyltransferase 10, NatA catalytic subunit	-0.190939	8.05423	-5.2861	3.57903e-06	8.51847e-05	3.97675
Q0ZOunU_R1JUphLKIc	NA	NA	-0.191723	7.70893	-5.45999	1.99256e-06	5.3461e-05	4.54965
clCoASEUgfq_KkcUh4	ATXN1	ataxin 1	-0.192195	7.84523	-4.93497	1.15531e-05	0.00022782	2.83336
6ZmPadI6XF0RH2KKOw	NA	NA	-0.192458	7.97742	-3.25968	0.0021352	0.014103	-2.17624
9iOlUeh1JfphIiIdTc	NA	NA	-0.192525	7.92514	-3.25708	0.00215102	0.0141863	-2.18316
uLiWI8TR5HUm6iEiFc	NA	NA	-0.193045	8.16846	-2.84665	0.0066468	0.0340158	-3.23216
Z9cUXfeX1.id76n6o0	RAB5B	RAB5B, member RAS oncogene family	-0.193163	9.79425	-2.88885	0.00594049	0.0311317	-3.12864
cgCe7bvV7gHiSu7vpk	ABLIM1	actin binding LIM protein 1	-0.193249	8.58658	-3.09817	0.00335984	0.0201068	-2.60015
30nVYTk.Hd5bq3ktnk	COPZ1	coatomer protein complex, subunit zeta 1	-0.19385	8.21156	-3.86304	0.000358194	0.00356944	-0.48419
corenSnS.3RPrk3fTk	TM6SF1	transmembrane 6 superfamily member 1	-0.19389	8.01917	-3.35066	0.00164584	0.0115607	-1.9316
NX3lCuj_8t0pXXpRPk	AGAP6	ArfGAP with GTPase domain, ankyrin repeat and PH domain 6	-0.194435	8.24938	-3.00646	0.00432369	0.0242598	-2.8347
lv.m6i7uXm6u7m7_r8	SIAH1	seven in absentia homolog 1 (Drosophila)	-0.19493	8.37061	-3.4741	0.00114997	0.00880023	-1.59338
HVQfZXlR_H0UDV9eiE	ID3	inhibitor of DNA binding 3, dominant negative helix-loop-helix protein	-0.195619	7.7301	-4.61554	3.30069e-05	0.000526564	1.81312
clA5KXu7J7u..e6_WQ	ESYT2	extended synaptotagmin-like protein 2	-0.196087	8.94821	-2.73552	0.00889674	0.0425218	-3.49966
9_BWopor4kHEeZ5Noc	WDR74	WD repeat domain 74	-0.196699	7.83781	-3.49842	0.00107079	0.00834575	-1.52591
Zt6SoeDheO0j8j316o	GLS	glutaminase	-0.19685	7.82884	-7.04251	9.0825e-09	6.20976e-07	9.85193
iUI_VR5HUV6kOiyh3s	LLPH	LLP homolog, long-term synaptic facilitation (Aplysia)	-0.199711	8.54365	-3.27995	0.00201546	0.0134729	-2.12207
rniefXv994_deqAEZc	SRSF8	serine/arginine-rich splicing factor 8	-0.202237	8.08224	-4.22355	0.000116381	0.00144927	0.59488
EfeU4_wv14hdVJTkgc	PPP2R2B	protein phosphatase 2, regulatory subunit B, beta	-0.202279	7.96277	-3.70049	0.00058698	0.00518933	-0.955356
NTqUQN3ELl5zV3VHVQ	ERF	Ets2 repressor factor	-0.202351	7.6587	-4.85364	1.51183e-05	0.000280918	2.57157
QezlSoC6bzBKCSLpzo	NA	NA	-0.202804	7.76623	-4.35928	7.55294e-05	0.00102019	1.01193
iWI05R5FUkXpxIuIf4	FAM153B	family with sequence similarity 153, member B	-0.203074	7.86188	-4.0556	0.000197401	0.00223646	0.0866765
os7R3rV.AiQ16CCSio	PEBP1	phosphatidylethanolamine binding protein 1	-0.203733	8.30244	-3.26903	0.00207913	0.0138099	-2.15127
xvq.Uv0W7vKmKjj7A8	NA	NA	-0.203881	7.98655	-4.69381	2.5564e-05	0.000431953	2.06106
TBNRe3ob5Oirpkpd1A	NME3	non-metastatic cells 3, protein expressed in	-0.204056	7.93872	-3.72754	0.000540996	0.00487034	-0.877676
ilO3VQdRDN3NOoBF6o	NA	NA	-0.205303	7.88034	-5.13538	5.9302e-06	0.000128691	3.48354
uqX6syIknSC01SV3g0	TMX4	thioredoxin-related transmembrane protein 4	-0.205456	7.86143	-5.52766	1.5853e-06	4.40698e-05	4.77355
lvF5Pu4SQjW9QpXaS4	APEX1	APEX nuclease (multifunctional DNA repair enzyme) 1	-0.206079	8.44505	-3.31297	0.001834	0.0125878	-2.03344
xH4ngBUjrvB6WVR.Wk	MAL	mal, T-cell differentiation protein	-0.207037	8.06934	-3.14388	0.0029587	0.0182616	-2.48155
HjjXHnVJBdxNSg4tXI	MAP4K1	mitogen-activated protein kinase kinase kinase kinase 1	-0.207896	8.67179	-3.08064	0.00352689	0.0208389	-2.64535
ToJ6ycuXdzQNKv5F_I	NPL	N-acetylneuraminate pyruvate lyase (dihydrodipicolinate synthase)	-0.208653	9.10936	-2.92011	0.00546301	0.029191	-3.05128
unJP.UGKgfPWRqXHso	ACOX1	acyl-CoA oxidase 1, palmitoyl	-0.208686	8.22585	-3.50881	0.0010386	0.00814936	-1.49703
Zni4ry6i60D6x36KCA	BICD2	bicaudal D homolog 2 (Drosophila)	-0.209162	8.37099	-2.70284	0.00968157	0.0450095	-3.57689
ZZIrR7pAl0QJVd1y9M	DPEP3	dipeptidase 3	-0.210425	7.5965	-4.53021	4.35512e-05	0.000654118	1.54445
uoeHEOEjEOI1ltHqik	NA	NA	-0.211719	7.67043	-5.41695	2.30406e-06	6.02662e-05	4.40749
EShicef6Jir9ef_L4U	CDK19	cyclin-dependent kinase 19	-0.212302	8.28672	-3.85211	0.00037039	0.00367238	-0.516192
EZ36jee93UqdSBeMXs	FOXO3	forkhead box O3	-0.213463	8.16196	-2.98118	0.00463188	0.0256798	-2.89855
ZR8Ey4XUvU1Oe2QuEo	NA	NA	-0.215009	7.62346	-5.36333	2.76033e-06	6.93331e-05	4.23072
i1ealXO.i.jp56NdHQ	SLC35E2B	solute carrier family 35, member E2B	-0.215044	8.56502	-3.05167	0.00382008	0.0220561	-2.71966
r4mma567H260oa0o4g	FAM174A	family with sequence similarity 174, member A	-0.215832	7.87696	-5.38153	2.59623e-06	6.63407e-05	4.29067
N20dE5GEtfvVUoKl64	MPPE1	metallophosphoesterase 1	-0.215976	8.3141	-2.81492	0.00722842	0.0361196	-3.3093
fJhIzjiNT7R6opDteo	NA	NA	-0.216467	7.68925	-5.11927	6.25813e-06	0.000134652	3.43101
HKVXxR9SlVJJP96WFc	NA	NA	-0.216537	7.58289	-6.37072	8.98616e-08	4.15475e-06	7.59277
opfFAkAirkIO6izt5Y	UBE4B	ubiquitination factor E4B	-0.217003	7.91924	-6.19256	1.65133e-07	6.76894e-06	6.99398
fJy64yREG6NU2p6830	NA	NA	-0.217461	7.59811	-6.02217	2.95352e-07	1.06303e-05	6.42233
ZUnD6Crimoo2fgXqKY	PIGX	phosphatidylinositol glycan anchor biosynthesis, class X	-0.217475	7.76102	-4.86325	1.4646e-05	0.000275086	2.60245
rQKpUiAEUDpo4Za5Jg	NA	NA	-0.217686	7.73908	-3.95522	0.000269684	0.0028546	-0.212576
B_mSa7k0im7niCrrvA	D4S234E	DNA segment on chromosome 4 (unique) 234 expressed sequence	-0.217804	7.6622	-3.32179	0.00178823	0.0123454	-2.00967
0fqCeKyij5_JU4LSnk	SMCR5	Smith-Magenis syndrome chromosome region, candidate 5 (non-protein coding)	-0.218125	8.05669	-3.09225	0.00341539	0.0203267	-2.61543
ulQV9XRfpFIRUofPwE	ITGA5	integrin, alpha 5 (fibronectin receptor, alpha polypeptide)	-0.219776	8.35189	-3.04624	0.00387748	0.022322	-2.73352
felPSlYCaKWAIiATWA	SRPK2	SRSF protein kinase 2	-0.219782	7.78983	-5.39931	2.44522e-06	6.3304e-05	4.3493
xorMF.VUSF4ie5f9zk	SERTAD2	SERTA domain containing 2	-0.220121	8.56064	-2.86131	0.00639293	0.0330336	-3.1963
HoNRWCLpzAbWZdT5nc	SNHG9	small nucleolar RNA host gene 9 (non-protein coding)	-0.220248	7.81551	-5.97902	3.42158e-07	1.20696e-05	6.27778
Qej64pW7px97oJLnss	RPL17	ribosomal protein L17	-0.221028	7.90795	-3.0522	0.00381451	0.0220311	-2.7183
QVJXp6lSZe73u8gK.w	RNF44	ring finger protein 44	-0.221254	8.17714	-5.04657	7.97482e-06	0.000164974	3.19455
NPy5UqLUmDht7pQmK0	ZNF395	zinc finger protein 395	-0.22174	7.91043	-6.2937	1.16905e-07	5.16248e-06	7.33381
EA_K6q7SKKQKrVJ5rQ	TRAPPC6A	trafficking protein particle complex 6A	-0.222133	7.84187	-6.40627	7.95841e-08	3.76811e-06	7.71235
0p6J6iK54nBLlBC518	ADCK3	aarF domain containing kinase 3	-0.2222	8.02356	-4.20981	0.000121556	0.0015005	0.552968
6ce8riotElISIs_eio	NDRG3	NDRG family member 3	-0.222463	8.0963	-5.96381	3.60366e-07	1.26114e-05	6.22684
uih0kSUFMNJO3qMh60	RALBP1	ralA binding protein 1	-0.222553	8.10713	-4.28805	9.48194e-05	0.00122918	0.792397
cCUgLove1nmJeiOqBI	PASK	PAS domain containing serine/threonine kinase	-0.222893	8.03427	-4.83838	1.58989e-05	0.000292052	2.52259
KiaI2VRxHUl60EgEAA	NA	NA	-0.223159	7.88947	-4.23508	0.000112205	0.00140194	0.630089
xkf6inikhI0YLSiNiE	NA	NA	-0.223633	7.83021	-3.36222	0.00159191	0.0112849	-1.90024
EW4TXgV6MgJeJU_je4	NELL2	NEL-like 2 (chicken)	-0.224188	7.9877	-4.45929	5.47714e-05	0.000785974	1.32256
0RcpneulfkglcLGvHw	NA	NA	-0.224457	8.18083	-3.63953	0.000704788	0.0059772	-1.12931
x453XXFIuCVEi1dRdQ	TRAPPC1	trafficking protein particle complex 1	-0.225911	8.74784	-4.10048	0.000171536	0.00200103	0.221589
NU44rJ91ep3X35eV7c	ALDOC	aldolase C, fructose-bisphosphate	-0.226902	8.04664	-4.58292	3.67036e-05	0.000572136	1.7102
uzp51JVH3yT3x133qk	CAMK2G	calcium/calmodulin-dependent protein kinase II gamma	-0.22908	8.39334	-3.48467	0.00111491	0.00860256	-1.5641
9cOh3Hr_Ln3iejhYWU	VPS37C	vacuolar protein sorting 37 homolog C (S. cerevisiae)	-0.229182	8.96084	-3.08593	0.00347564	0.020598	-2.63172
3oUnEA30oUnSDgDlqk	NA	NA	-0.229924	8.37371	-2.84311	0.00670931	0.0342585	-3.24077
BV9KdE5EoOcTjpSefU	GABARAPL1	GABA(A) receptor-associated protein like 1	-0.230061	8.08853	-5.87086	4.94568e-07	1.65554e-05	5.91593
xafXuefu0DoF5XcCR8	CYBRD1	cytochrome b reductase 1	-0.231453	7.87106	-3.79767	0.000437362	0.00414604	-0.67492
BXuAgwUeR1BepBOkIU	EVI5	ecotropic viral integration site 5	-0.232279	8.11424	-3.63798	0.000708066	0.00599638	-1.13372
xp0UixUgg0s6DyKEuk	NA	NA	-0.232772	8.19711	-3.5663	0.000876454	0.00710308	-1.33622
oKUt9F1N9U.MDXAuqo	NA	NA	-0.232848	8.16343	-3.76955	0.000476377	0.00441427	-0.756436
lWKS6ggCqf5f7Bf44U	NA	NA	-0.232854	8.03751	-3.20638	0.00248287	0.0158782	-2.31761
Q7qu6noJHp1esqEMCs	TSSC4	tumor suppressing subtransferable candidate 4	-0.233384	8.24501	-3.35589	0.00162126	0.0114243	-1.91744
xoiJ6v9QvF4XwI54Z4	NA	NA	-0.234356	7.81753	-4.81231	1.73251e-05	0.000312677	2.43905
TSj1FSsFkQtS_uskng	NACAP1	nascent-polypeptide-associated complex alpha polypeptide pseudogene 1	-0.235051	7.71504	-4.87653	1.40177e-05	0.000267772	2.64512
Ql0M7nlLv1NLOSKKyk	NA	NA	-0.235153	7.64817	-4.50337	4.75048e-05	0.000701012	1.46032
K6IlaZV5RdXhW3DMwM	MAPK3	mitogen-activated protein kinase 3	-0.235917	9.17847	-2.89035	0.00591663	0.0310159	-3.12493
Qn5VH0iv_q9Kue7dV8	LPPR2	lipid phosphate phosphatase-related protein type 2	-0.236234	7.94286	-3.64096	0.000701773	0.00595733	-1.12524
K.b_LXnvrtokYqika4	BANP	BTG3 associated nuclear protein	-0.236508	8.10569	-3.15325	0.00288229	0.017846	-2.45711
W09huvbuAjlDpBJ.lk	NA	NA	-0.236626	7.57047	-5.25654	3.95243e-06	9.2302e-05	3.87976
WU3XQhURSLdLkihUp0	NA	NA	-0.236849	7.75818	-4.98884	9.66246e-06	0.0001951	3.00744
6vcSnTTlCAgnlSCupk	NA	NA	-0.237462	8.15565	-5.8268	5.74568e-07	1.88765e-05	5.76873
0SU5CShIOuHq5X64ns	TMED3	transmembrane emp24 protein transport domain containing 3	-0.23775	8.5103	-2.81721	0.0071848	0.0359911	-3.30373
cvie6Gat3veSjqrAHg	NA	NA	-0.237908	7.67072	-5.0462	7.98462e-06	0.000164984	3.19336
lShIpBuiKeAEuSIb_E	SULF2	sulfatase 2	-0.238283	8.32809	-3.39409	0.00145182	0.0105063	-1.81344
B_5R5EdQ3q4CFiHWXQ	CD96	CD96 molecule	-0.238296	8.12181	-3.92819	0.000293164	0.00305015	-0.292529
3gnikog67gVLiWI25Q	SNAPC1	small nuclear RNA activating complex, polypeptide 1, 43kDa	-0.23975	7.9186	-3.46374	0.00118539	0.00902831	-1.62205
QlKVx3yVfTTtN1fOeg	ZFAND2B	zinc finger, AN1-type domain 2B	-0.241053	8.30911	-4.50696	4.69555e-05	0.000695224	1.47157
oqhLA7Oq2Srvi4Sink	B9D2	B9 protein domain 2	-0.241316	8.19581	-4.45583	5.53855e-05	0.0007935	1.31178
rR_heopIr9LiVI2YR4	PLA2G2D	phospholipase A2, group IID	-0.241382	7.94333	-3.64275	0.000698023	0.00594488	-1.12015
cKgKgtuiKSoA68JJWk	CCNY	cyclin Y	-0.241757	7.88608	-6.35342	9.53325e-08	4.31874e-06	7.53459
BiSop96y534517t6_k	CYB561D1	cytochrome b-561 domain containing 1	-0.242765	8.6464	-5.811	6.06292e-07	1.95586e-05	5.71598
fihegZuipMGqASOi18	KIF22	kinesin family member 22	-0.244	7.96101	-6.97216	1.15396e-08	7.56826e-07	9.61569
cSEFX6dSe0oUh4juSc	NA	NA	-0.244343	7.8497	-5.62198	1.15192e-06	3.3605e-05	5.08645
fJ5fUp.M954glAnoI4	TSTD1	thiosulfate sulfurtransferase (rhodanese)-like domain containing 1	-0.244662	7.74282	-6.61042	3.96281e-08	2.12647e-06	8.39919
cndSXiQSJaFe3RQKAA	COX19	COX19 cytochrome c oxidase assembly homolog (S. cerevisiae)	-0.244969	8.21626	-4.52815	4.38434e-05	0.000657391	1.53798
0..gjSdbqnr.rUSTBI	OCIAD2	OCIA domain containing 2	-0.245125	7.98535	-4.7403	2.1952e-05	0.000379614	2.209
l316teqSpi1C7invj8	MEF2D	myocyte enhancer factor 2D	-0.245246	7.9218	-6.28148	1.21887e-07	5.30313e-06	7.29274
9ThUcTUkXtP6ooc1KQ	ERGIC3	ERGIC and golgi 3	-0.24564	8.05629	-4.82737	1.64863e-05	0.000300349	2.48731
QKpvdUCPK2.1AiWbVo	BIN1	bridging integrator 1	-0.245656	8.61894	-3.37972	0.00151347	0.0108504	-1.85264
cVeeL6A9S5JHj4US_U	CYBRD1	cytochrome b reductase 1	-0.246606	7.95615	-3.57586	0.00085195	0.00695211	-1.30933
EriIgoBfqKKE8evvek	SKAP1	src kinase associated phosphoprotein 1	-0.251236	8.59674	-3.6184	0.000750685	0.0062733	-1.18924
cXyv45oN5YuOmnVSo4	C19orf60	chromosome 19 open reading frame 60	-0.252347	8.29424	-4.24976	0.000107097	0.00135365	0.674993
9BPcw_MHV4l0IRfWJ4	NA	NA	-0.253597	8.38165	-3.77084	0.000474519	0.00440397	-0.75271
oqqRopXrpXqOqBZrp8	NA	NA	-0.254713	7.76333	-4.66049	2.85059e-05	0.000473028	1.95534
0pKeK4gjT6L8oPop5I	VHL	von Hippel-Lindau tumor suppressor	-0.2548	8.17796	-2.71927	0.00927938	0.0437485	-3.53815
6993jqamKu727jq_i4	FRMD8	FERM domain containing 8	-0.255432	8.49293	-4.84851	1.53763e-05	0.000284518	2.55511
WhKIH.9TObkx3ew9S4	ATXN1	ataxin 1	-0.255484	7.93937	-5.49193	1.78883e-06	4.9111e-05	4.65525
ZRdR7js7WdXbe9VSjc	MAPK8IP3	mitogen-activated protein kinase 8 interacting protein 3	-0.25575	8.04508	-5.46524	1.95755e-06	5.27616e-05	4.567
QXiUguq58x1QF_LtSU	MARCKSL1	MARCKS-like 1	-0.256003	8.33451	-4.36772	7.35166e-05	0.00100064	1.03802
EaikaWI7EYISi0OiPc	NQO2	NAD(P)H dehydrogenase, quinone 2	-0.25609	7.96745	-2.91206	0.00558246	0.0297267	-3.07126
6iefKhK4tfqpOgQJ60	NA	NA	-0.256408	7.79549	-5.37835	2.62415e-06	6.68612e-05	4.28021
czC7taD66vfrdHh9CA	NA	NA	-0.256682	8.06644	-5.8125	6.03218e-07	1.95279e-05	5.72097
o70mfYDPX00OEGSfes	WLS	wntless homolog (Drosophila)	-0.257749	7.81826	-3.76788	0.000478796	0.00442511	-0.761267
695JOXVUTdMkUr7t4U	RAPGEF6	Rap guanine nucleotide exchange factor (GEF) 6	-0.257868	8.38701	-4.55783	3.98196e-05	0.000609443	1.63123
9kNJPXVe6OEyItOVAQ	PITPNC1	phosphatidylinositol transfer protein, cytoplasmic 1	-0.259171	8.01284	-6.88043	1.57729e-08	9.73195e-07	9.30742
BR1eSUaCo01_ik1S48	NA	NA	-0.259345	8.17781	-5.1949	4.85961e-06	0.000109344	3.67791
9wUUhT197L0ogRX1FU	NA	NA	-0.259367	8.10752	-3.74872	0.000507433	0.00463894	-0.816647
0uB0lCRLrpKlwecQKI	NA	NA	-0.259856	9.81803	-2.83598	0.00683719	0.0347281	-3.25814
i13nKFKuP0JSoJB6hU	ASF1B	ASF1 anti-silencing function 1 homolog B (S. cerevisiae)	-0.260187	7.70866	-5.9563	3.69697e-07	1.2887e-05	6.20172
NT6kf1TdQdoLCVCIEE	GPR183	G protein-coupled receptor 183	-0.260868	7.78954	-4.07293	0.000186991	0.00214737	0.138704
fe4u3cq4xuriArXrWY	RPL38	ribosomal protein L38	-0.262341	12.5242	-4.38351	6.98884e-05	0.000962351	1.08692
ESi4qOnqCDdSt7pX7s	NA	NA	-0.262471	8.08723	-3.94119	0.000281632	0.00295797	-0.2541
HdUvciQ3EnvzuK5UEU	CPD	carboxypeptidase D	-0.264143	8.24292	-3.81981	0.000408821	0.00396248	-0.610498
Q9Vq6GG5_bV5K3fZEI	SEC14L1	SEC14-like 1 (S. cerevisiae)	-0.265459	8.3754	-2.65592	0.0109203	0.0492052	-3.68662
onuvl521ULhcxe79_U	AKR1B1	aldo-keto reductase family 1, member B1 (aldose reductase)	-0.266267	8.48989	-5.23727	4.21635e-06	9.75989e-05	3.81661
B_tpUSfXglCdVqVJ0o	NA	NA	-0.267313	7.81166	-3.83128	0.000394759	0.00384934	-0.577071
NnpUIV8gV4uekDdHnU	GRAP	GRB2-related adaptor protein	-0.268252	8.74369	-3.42684	0.00132011	0.00981382	-1.72372
6VaC_SJDe67e0yVBy0	NA	NA	-0.268937	8.64463	-3.76792	0.000478738	0.00442511	-0.761151
f7egpDeVeiuskI9RKM	NA	NA	-0.269239	8.04448	-5.15949	5.47097e-06	0.000120377	3.56221
NK57uluO5IiS4qKvTg	CNNM3	cyclin M3	-0.269896	7.94517	-6.07881	2.43463e-07	9.1534e-06	6.61223
B3iXW2Vde_rCrvi7h8	ATP6V0E2	ATPase, H+ transporting V0 subunit e2	-0.27073	8.46045	-3.88379	0.000336109	0.00340883	-0.423341
TrUix_.1Y7tSUnWSSc	BHLHE40	basic helix-loop-helix family, member e40	-0.270988	8.5223	-2.94569	0.00509926	0.0276647	-2.98757
rVP0hJBOyCO9JuSp_c	KIAA0226L	KIAA0226-like	-0.271614	8.0024	-5.42424	2.2481e-06	5.89767e-05	4.43155
iQou135131FdLo4w3g	NA	NA	-0.27197	8.40605	-3.57479	0.000854667	0.00696157	-1.31235
WJ1yeuMaIqf6KH6hJI	ESYT1	extended synaptotagmin-like protein 1	-0.27221	8.80167	-3.27784	0.00202764	0.0135441	-2.12773
cVdrdRuuzo3utPtXeQ	MAP1LC3A	microtubule-associated protein 1 light chain 3 alpha	-0.272656	8.37172	-2.80355	0.00744805	0.0369958	-3.33679
iby0rBoKU_gOqabRLU	WLS	wntless homolog (Drosophila)	-0.272771	7.77337	-3.71518	0.000561557	0.00501252	-0.913201
Z1J957X3_6IkK4TESI	STAG3L2	stromal antigen 3-like 2	-0.272982	8.41172	-4.17641	0.000135089	0.00163958	0.45133
3VS7swnpP2Un7GyflE	MID1IP1	MID1 interacting protein 1 (gastrulation specific G12 homolog (zebrafish))	-0.273137	8.44265	-3.16031	0.00282588	0.0175828	-2.43865
6l0LqRVUJEJC0J3UII	KAT8	K(lysine) acetyltransferase 8	-0.273251	8.01012	-5.37417	2.66138e-06	6.75183e-05	4.26643
KyiOkWAmCgnXnXXAlg	RPL23AP7	ribosomal protein L23a pseudogene 7	-0.274768	7.90532	-4.61828	3.27142e-05	0.000522837	1.82176
9cXeUALqp7Hqh52jjc	CERS2	ceramide synthase 2	-0.275451	8.27339	-5.97571	3.46034e-07	1.21821e-05	6.26671
urOiuv2uoOEH_tOigE	NA	NA	-0.276452	8.12176	-3.3494	0.00165183	0.0115936	-1.93502
uiik_0fVFKOSh_q_K4	EGLN2	egl nine homolog 2 (C. elegans)	-0.276636	8.14287	-4.21794	0.000118466	0.00146905	0.577766
3VKK6C_f4liPkU_x1I	PCDHB9	protocadherin beta 9	-0.277086	7.88076	-3.70867	0.000572694	0.00509612	-0.931901
ZS4J4QDQLpUqLt657k	IMPDH2	IMP (inosine 5'-monophosphate) dehydrogenase 2	-0.279844	8.22148	-5.82282	5.82402e-07	1.90632e-05	5.75544
WneoUdII6ju6uijl_0	NUDT16L1	nudix (nucleoside diphosphate linked moiety X)-type motif 16-like 1	-0.280974	7.94962	-6.11907	2.12214e-07	8.2591e-06	6.74728
3FrTlTWg7cwgogJ2Lg	NA	NA	-0.28113	7.64413	-5.43142	2.19428e-06	5.80192e-05	4.45526
3UdTfQFV0X9U1x15Tk	MLF2	myeloid leukemia factor 2	-0.281863	8.29471	-5.17474	5.19888e-06	0.00011551	3.61202
3V6ylRB9UCUJ1kpUnQ	NA	NA	-0.282377	7.78796	-4.49708	4.84805e-05	0.000713034	1.44063
HvhnQiSj1Un9b5EBLg	CDC123	cell division cycle 123 homolog (S. cerevisiae)	-0.283663	8.16485	-5.70047	8.82667e-07	2.70889e-05	5.34749
ZoUld3I_eg_zo7vqvo	NA	NA	-0.284955	8.00364	-6.74731	2.48351e-08	1.44665e-06	8.85977
NkLsYnuVBSYkXX0rx8	PABPC3	poly(A) binding protein, cytoplasmic 3	-0.285591	7.80898	-4.93552	1.1532e-05	0.000227657	2.83514
BdpJJehL0DkLv2JJdI	CAMK1D	calcium/calmodulin-dependent protein kinase ID	-0.28656	7.90024	-4.14992	0.000146854	0.00175472	0.370972
xWu5ijRJiiAH3oC7pc	KIAA0226L	KIAA0226-like	-0.286673	7.99471	-6.27208	1.25862e-07	5.4228e-06	7.26115
9f66a2aK6.a6g4Qf60	NA	NA	-0.28763	8.71007	-3.60082	0.000791061	0.00654365	-1.23898
oxei.DEuJ3JCopnl.4	MAPK1	mitogen-activated protein kinase 1	-0.2879	8.93756	-4.29591	9.24749e-05	0.00120408	0.816549
fV3QsOnScMCmROHVAA	NA	NA	-0.288374	12.5033	-2.65298	0.0110026	0.0494999	-3.69344
fG6J4IKYNWFxU1w1mA	NDUFA2	NADH dehydrogenase (ubiquinone) 1 alpha subcomplex, 2, 8kDa	-0.288427	8.88083	-4.70124	2.49502e-05	0.000422793	2.08466
ZpO5egcWLKJT9.sVeU	CCNY	cyclin Y	-0.289658	8.62746	-3.47998	0.00113034	0.00869131	-1.5771
NxWZ57yEdZT1693WBY	RAB40C	RAB40C, member RAS oncogene family	-0.289957	8.49648	-4.14045	0.0001513	0.00179842	0.34228
T4kaIl0766v1IuO4CU	TMEM216	transmembrane protein 216	-0.290486	8.02077	-6.2374	1.41692e-07	6.00257e-06	7.14459
u3V.VN_H3oMlflAxSo	NA	NA	-0.290623	8.40733	-3.50831	0.00104013	0.00815552	-1.49842
9GoohS1VFSWxSAwKfc	CD7	CD7 molecule	-0.291409	8.8934	-2.76057	0.00833534	0.0404168	-3.44
6pd51515eTvd3vvol4	ARF5	ADP-ribosylation factor 5	-0.291537	8.79208	-3.75785	0.000493581	0.00454043	-0.790265
rooyfiVKL2IXl6kMyY	BCYRN1	brain cytoplasmic RNA 1 (non-protein coding)	-0.295139	8.67655	-2.80222	0.007474	0.0370935	-3.33998
3lf7l__qgFLhkgmLug	NA	NA	-0.295603	8.54239	-3.28417	0.00199137	0.0133415	-2.11078
EfUP4gVOzq_S4liNuU	FAM40B	family with sequence similarity 40, member B	-0.29867	8.26886	-2.90851	0.00563586	0.029907	-3.08005
BpropQx.kAUYBQunOk	HNRNPA1P10	heterogeneous nuclear ribonucleoprotein A1 pseudogene 10	-0.299838	7.71551	-7.05372	8.74256e-09	6.02386e-07	9.88957
utoSUnArujiQMaei5Y	EIF3K	eukaryotic translation initiation factor 3, subunit K	-0.301354	9.73794	-5.17088	5.26652e-06	0.00011672	3.5994
6SBHqKt6R_OqvL5_kk	ST6GALNAC2	ST6 (alpha-N-acetyl-neuraminyl-2,3-beta-galactosyl-1,3)-N-acetylgalactosaminide alpha-2,6-sialyltransferase 2	-0.301714	8.24208	-3.43965	0.00127178	0.00952249	-1.68851
KUR1JephIeI901ItA8	NA	NA	-0.301922	8.54916	-3.2577	0.0021472	0.0141717	-2.1815
lXb5HniJCOrRSSex6I	RPS29	ribosomal protein S29	-0.304119	8.11563	-3.52409	0.0009929	0.00787336	-1.45442
EDF16j7ictPSXuwU7o	MRPS6	mitochondrial ribosomal protein S6	-0.30433	9.08662	-3.94578	0.000277667	0.00292326	-0.24052
NdCdaoChPoCVNiCqXI	EDF1	endothelial differentiation-related factor 1	-0.304379	8.55547	-6.26308	1.29792e-07	5.57855e-06	7.2309
QPaUq92d06TedIXkS0	NA	NA	-0.306122	7.85848	-5.37403	2.66267e-06	6.75183e-05	4.26595
cA.6KSCd6VU666KUsc	NA	NA	-0.309312	8.26127	-4.6352	3.09587e-05	0.000501112	1.87525
EYR7oeBEeCd46gBeuE	ABHD5	abhydrolase domain containing 5	-0.309542	8.34007	-3.92028	0.000300408	0.00311271	-0.315895
Q5R5_pIsArlKKJOrug	EGLN2	egl nine homolog 2 (C. elegans)	-0.30986	10.6883	-2.78933	0.00773149	0.0381363	-3.37107
oiWI0YR5HUnu4SDiFM	DOPEY2	dopey family member 2	-0.31115	8.38186	-3.96545	0.000261273	0.00279214	-0.182217
HXVeIuKF01hTsPFPZ8	C7orf41	chromosome 7 open reading frame 41	-0.311611	8.50017	-3.4562	0.0012118	0.00915468	-1.64287
ZfIlMJVEzzV4EKknXk	ARAP3	ArfGAP with RhoGAP domain, ankyrin repeat and PH domain 3	-0.315228	8.14457	-4.59238	3.55918e-05	0.000559734	1.74001
fEk0L3mqUU2Wl7d17c	ALKBH7	alkB, alkylation repair homolog 7 (E. coli)	-0.316633	7.79992	-5.85009	5.30804e-07	1.7635e-05	5.84651
rioPFQfpTMIiiUXkuU	GLIPR1	GLI pathogenesis-related 1	-0.316834	8.8122	-3.28569	0.00198275	0.0132944	-2.10671
rTcwCgC44qe54L_eeU	NA	NA	-0.317007	7.67308	-7.23024	4.79911e-09	3.58577e-07	10.4815
Ql1H6oV5du2383lzx0	SPOCK2	sparc/osteonectin, cwcv and kazal-like domains proteoglycan (testican) 2	-0.317429	9.88471	-2.72833	0.0090643	0.0430773	-3.51672
oCiDv_6FH_v9.9k5JI	NA	NA	-0.317849	7.8493	-4.26956	0.000100567	0.00128952	0.735645
0Ev0FSimgvkuJYhZRM	LOC100134868	hypothetical LOC100134868	-0.318502	8.4265	-3.11923	0.00316912	0.019199	-2.54566
Krrborr9LqDhB.rPoo	LOC728643	heterogeneous nuclear ribonucleoprotein A1 pseudogene	-0.318548	8.33604	-3.94029	0.000282417	0.0029627	-0.256767
ogdIH5dTr4sEJ7EIFU	RPL23A	ribosomal protein L23a	-0.318668	7.95432	-7.02251	9.7221e-09	6.6215e-07	9.78478
xsHVVKxjKh4M6FeeAk	IRS2	insulin receptor substrate 2	-0.319673	7.92634	-7.81619	6.64116e-10	6.42632e-08	12.4348
HRigdv4KqSbJO3j_UU	PINK1	PTEN induced putative kinase 1	-0.322495	8.34135	-5.09838	6.71007e-06	0.000141962	3.36297
xVF_TrlX15MoeghYL8	CAMK1D	calcium/calmodulin-dependent protein kinase ID	-0.322659	8.15859	-4.69981	2.50668e-05	0.000424362	2.08013
9jjkvez8_57t61wuiU	ATP6V1A	ATPase, H+ transporting, lysosomal 70kDa, V1 subunit A	-0.322808	9.53142	-4.24197	0.000109779	0.00138065	0.651153
ltOll5e09eHRRbVSuA	IMPDH1	IMP (inosine 5'-monophosphate) dehydrogenase 1	-0.323936	9.3196	-3.1519	0.00289322	0.0178887	-2.46065
TYnkwnpUQsSFIhAkIg	NA	NA	-0.3249	7.77826	-6.12599	2.07262e-07	8.10199e-06	6.7705
Zr5EWiIBXEDuiDukCU	ZNF91	zinc finger protein 91	-0.324947	7.88229	-5.90899	4.34359e-07	1.48201e-05	6.0434
QNB1VClYiueTFGxSJQ	NARF	nuclear prelamin A recognition factor	-0.325215	8.16325	-4.57323	3.78781e-05	0.000585803	1.67967
B1JepBESohXt1EA7yU	DCLRE1C	DNA cross-link repair 1C	-0.325651	8.428	-3.91875	0.000301827	0.00312193	-0.320405
cXp3tFlOQdTlz8egF4	COX4I1	cytochrome c oxidase subunit IV isoform 1	-0.326355	10.748	-3.81454	0.000415447	0.00400064	-0.625849
TUQBQrpzpr1LJJLIzs	NA	NA	-0.327025	8.66355	-4.59969	3.47552e-05	0.000549015	1.76307
l4rXoubiXronhdnwqQ	APRT	adenine phosphoribosyltransferase	-0.327375	8.63253	-4.64657	2.98317e-05	0.000489129	1.91123
EpfTTbp6DeXeXcfXv0	WLS	wntless homolog (Drosophila)	-0.330123	7.9494	-4.36116	7.50768e-05	0.00101718	1.01774
l4dCp7I71f1FVRH65s	TMEM71	transmembrane protein 71	-0.330307	9.22847	-2.97784	0.00467408	0.0258652	-2.90696
reEru5lNPqpO9Eunoc	ERGIC3	ERGIC and golgi 3	-0.332579	8.80085	-4.97827	1.00076e-05	0.000200923	2.97324
EdUoLS4_3.6n1XUChc	RTN3	reticulon 3	-0.332681	8.98521	-4.72362	2.31863e-05	0.000397082	2.15586
xuutuiuv0uoOEHesug	NA	NA	-0.333219	8.67816	-3.99205	0.00024059	0.00261693	-0.103165
ca70R4Huq2GoquX.E4	SIVA1	SIVA1, apoptosis-inducing factor	-0.336614	8.34963	-5.34583	2.92781e-06	7.25114e-05	4.17311
K4f7A3lRFSelM1FXYY	CABIN1	calcineurin binding protein 1	-0.33771	7.95055	-5.67242	9.70807e-07	2.91374e-05	5.25415
QLTjRlHmcSXqYRLCFc	HAUS2	HAUS augmin-like complex, subunit 2	-0.338459	8.77774	-3.16745	0.00276994	0.0172833	-2.41996
ipXV5HVd_ebvj_ikeQ	ATP6V0B	ATPase, H+ transporting, lysosomal 21kDa, V0 subunit b	-0.338675	10.4741	-4.20197	0.000124608	0.00153233	0.529087
Ze.f5SuDv7pOZ57WZU	NA	NA	-0.341397	8.23546	-3.96122	0.00026472	0.00281372	-0.194776
uhScUXyfTVcfkUFLVo	RNF216L	ring finger protein 216-like	-0.343117	8.3031	-6.01278	3.04958e-07	1.09537e-05	6.39087
iRl16UhnlnlnkUab.8	AKT1	v-akt murine thymoma viral oncogene homolog 1	-0.343365	9.09605	-4.12309	0.000159788	0.00188384	0.289788
6dqTX1Sr6t8RAyCnfk	FAIM3	Fas apoptotic inhibitory molecule 3	-0.347101	9.24877	-4.53236	4.32492e-05	0.000650685	1.55119
QhVZHV9yRVQKAJSKBA	PHOSPHO1	phosphatase, orphan 1	-0.350623	7.90443	-5.00651	9.11162e-06	0.000185245	3.06464
oUXe1f1aONWAOCfXpQ	NA	NA	-0.35149	8.00674	-7.4148	2.56792e-09	2.07638e-07	11.0989
f3y1RvSuIIXQKxXe1I	NA	NA	-0.352022	8.16909	-4.58519	3.64339e-05	0.000570444	1.71735
6k6ISwgCIarujCHeUU	CCNJL	cyclin J-like	-0.352285	7.88971	-6.61535	3.89655e-08	2.10869e-06	8.41581
BpQpq6Pl4nSi9CNLeg	NA	NA	-0.354096	8.61117	-3.13975	0.00299305	0.0184415	-2.49232
lrVAsaSeQAsugoD7cY	RTN3	reticulon 3	-0.354738	8.29116	-3.53248	0.000968618	0.00771583	-1.43098
cqk77tOy0lHzkUO4oA	RPS6KA5	ribosomal protein S6 kinase, 90kDa, polypeptide 5	-0.354827	8.57254	-3.07396	0.00359258	0.0211073	-2.66253
0fljnVJ4MCV5fcQdLs	LOC642934	hypothetical LOC642934	-0.358246	8.07243	-4.4531	5.58761e-05	0.000798591	1.30325
KoL5XxK6hf_7w3v91U	ZYG11B	zyg-11 homolog B (C. elegans)	-0.358989	8.59617	-5.2309	4.30742e-06	9.93175e-05	3.79573
6tRdEndeoxAnpOFRNc	NA	NA	-0.359465	7.84241	-5.98383	3.36597e-07	1.19209e-05	6.29388
BKS6Xoin_97Brl.3yo	PLEKHG3	pleckstrin homology domain containing, family G (with RhoGef domain) member 3	-0.360298	8.11532	-5.62939	1.12334e-06	3.29886e-05	5.11107
ueEXSoQIjehINloSuk	RPS19	ribosomal protein S19	-0.361554	12.3505	-3.6302	0.000724718	0.00610528	-1.1558
c12iGrpOqJJyBDkj00	PCBP2	poly(rC) binding protein 2	-0.362694	10.2996	-3.89061	0.000329136	0.0033462	-0.403289
3qKDXp0mov4SmPdV08	SSR2	signal sequence receptor, beta (translocon-associated protein beta)	-0.363394	8.96666	-5.2152	4.5402e-06	0.000103467	3.74432
NotX_u7gzu5eyKuqSo	ERGIC1	endoplasmic reticulum-golgi intermediate compartment (ERGIC) 1	-0.363529	8.19625	-5.38634	2.55453e-06	6.55589e-05	4.30651
36JWb571RKl2v.XB_c	SPSB3	splA/ryanodine receptor domain and SOCS box containing 3	-0.36576	9.07419	-3.65897	0.000664942	0.0057354	-1.07399
3ddSK3kR1H0Tlvh3RI	TBC1D14	TBC1 domain family, member 14	-0.365878	8.4666	-6.63148	3.68785e-08	2.01557e-06	8.47005
W5ZKS3qEygnqJCgKt8	NA	NA	-0.365889	7.98558	-6.08033	2.42203e-07	9.12539e-06	6.61733
f0KH150SVhgKOUDe0I	RPL38	ribosomal protein L38	-0.368198	12.5063	-5.33007	3.08733e-06	7.57169e-05	4.12123
BfS4lilEUeR1pfrhIg	NA	NA	-0.368234	8.90427	-3.04326	0.00390941	0.0224474	-2.74115
QLHwCbrVS4pQgL9a8I	DYRK2	dual-specificity tyrosine-(Y)-phosphorylation regulated kinase 2	-0.368578	8.2719	-4.96855	1.03357e-05	0.000205877	2.94181
xJ3qp4rqKPn4lSi8gk	C21orf58	chromosome 21 open reading frame 58	-0.369331	9.98483	-3.19809	0.00254156	0.0161369	-2.33948
llgBkKWCUCUqjoi.ug	NUDT5	nudix (nucleoside diphosphate linked moiety X)-type motif 5	-0.370558	8.25985	-8.01398	3.42594e-10	3.65461e-08	13.0889
lokghwIgYonhSjeYYU	TACC3	transforming, acidic coiled-coil containing protein 3	-0.371696	8.3292	-6.09285	2.32081e-07	8.83805e-06	6.6593
rWxSdCX1J3WtN.kprQ	NA	NA	-0.372534	9.45602	-5.1071	6.51753e-06	0.000138766	3.39138
cUnv1Ree5LRfI70glk	ISCU	iron-sulfur cluster scaffold homolog (E. coli)	-0.375112	9.35106	-5.31601	3.23674e-06	7.8194e-05	4.07502
Hq5QiHry0CXcgqjXb4	NDE1	nudE nuclear distribution gene E homolog 1 (A. nidulans)	-0.376311	9.60766	-2.74311	0.00872317	0.0418937	-3.48163
cLPXSdS5xeY3u.neGA	NA	NA	-0.376517	10.9744	-3.41673	0.00135951	0.0100142	-1.75147
Eqlesp1.IKFP3vXInw	FAM107B	family with sequence similarity 107, member B	-0.376519	8.66411	-6.61065	3.95965e-08	2.12647e-06	8.39998
Hg2fgVKKSI_S4lCHuU	NA	NA	-0.376607	9.50223	-3.72554	0.000544274	0.00489736	-0.88343
rQiV59Ix8TL.6oJQjY	NACA	nascent polypeptide-associated complex alpha subunit	-0.377184	11.0372	-3.9947	0.000238623	0.00260033	-0.0952957
QqwgOJctFCB1FVIoLo	PHB2	prohibitin 2	-0.377187	8.18435	-6.41409	7.74861e-08	3.70844e-06	7.73865
xLnlst1fSWU0483FKE	NA	NA	-0.378087	8.10393	-3.82812	0.000398582	0.00387807	-0.586275
0qH0HlSQToo67Xil1A	PTOV1	prostate tumor overexpressed 1	-0.378474	8.43766	-6.06093	2.5878e-07	9.62704e-06	6.55225
KLUr0Icl6kE6QhXtXM	DENR	density-regulated protein	-0.379333	8.49054	-3.59629	0.000801783	0.00660229	-1.25176
NhdSLgjq4cjjO7q6pY	ATP6V0B	ATPase, H+ transporting, lysosomal 21kDa, V0 subunit b	-0.380324	8.9246	-4.01701	0.000222634	0.00246554	-0.0287735
l41UF5GqT1593dKUUQ	TGM3	transglutaminase 3 (E polypeptide, protein-glutamine-gamma-glutamyltransferase)	-0.380446	7.87999	-5.59796	1.24959e-06	3.58053e-05	5.00669
WbrbqLsSlFVQrggeC8	FBL	fibrillarin	-0.381286	8.44792	-5.88277	4.7492e-07	1.60084e-05	5.95573
xqAt4uAo6XT3f3Dfno	NA	NA	-0.383451	8.20667	-6.85035	1.74759e-08	1.0526e-06	9.2063
Q2fAXqKSK4niNm0_R0	NA	NA	-0.38396	8.5949	-3.069	0.00364202	0.0213482	-2.67525
9hUoCu4noJHgXF0114	QARS	glutaminyl-tRNA synthetase	-0.385232	9.44506	-4.16814	0.000138659	0.00167259	0.426227
Nd63i0H9nqgBc6BceQ	SLC38A1	solute carrier family 38, member 1	-0.386785	8.78617	-3.80853	0.000423124	0.00405448	-0.64333
rUayR_F.2GfBf1ntlU	AKT1	v-akt murine thymoma viral oncogene homolog 1	-0.388876	9.4282	-3.94687	0.000276738	0.00291949	-0.237312
EfeUo_wv14pdVLXmgc	CLDN14	claudin 14	-0.389329	8.14935	-7.2817	4.03049e-09	3.11668e-07	10.6538
fLF6oryO7v0p_i7OLo	TP53INP1	tumor protein p53 inducible nuclear protein 1	-0.389518	8.71611	-4.5844	3.65279e-05	0.000570486	1.71485
Njm.HTcEw3hKl0kKiU	NA	NA	-0.390302	10.1952	-3.78814	0.00045023	0.00424079	-0.70259
NZSuffKU51AtNtS.dE	NA	NA	-0.390864	8.18446	-3.46098	0.00119499	0.00906248	-1.62967
B6kued8DXF9R0HVMQc	CD302	CD302 molecule	-0.392971	8.39616	-3.66018	0.000662542	0.00572028	-1.07056
oKiggmYIlvLTlruumk	SNHG6	small nucleolar RNA host gene 6 (non-protein coding)	-0.39412	8.38955	-4.58435	3.65332e-05	0.000570486	1.71471
uaQtLs2P3LnuC0lXgg	GPR183	G protein-coupled receptor 183	-0.395382	8.16903	-4.64293	3.01875e-05	0.000492682	1.89973
K5Knl0gnp6odyXe70w	TPRG1L	tumor protein p63 regulated 1-like	-0.395449	9.03919	-5.28806	3.55551e-06	8.49474e-05	3.98319
xXp1ae5nin_1Xtf6YI	FAM101B	family with sequence similarity 101, member B	-0.395556	7.78477	-7.52249	1.78455e-09	1.51927e-07	11.4584
6DkeBeh_qgIlizfUlk	SCAP	SREBF chaperone	-0.396263	8.89995	-4.2184	0.000118295	0.00146795	0.579165
xSuysyitCAKL2sCpMk	CPPED1	calcineurin-like phosphoesterase domain containing 1	-0.39675	7.88152	-5.28341	3.61154e-06	8.5728e-05	3.96791
QrrrTorr9rqDhB.jTo	NA	NA	-0.397132	9.11587	-4.32557	8.41262e-05	0.00111255	0.907855
NC64F06VEaXUKLCNXo	NA	NA	-0.397174	9.3109	-3.81136	0.000419496	0.00402844	-0.63511
3hqUlinEAHBXo1x3fM	RPL18	ribosomal protein L18	-0.397345	12.5144	-4.46514	5.37477e-05	0.000774421	1.34082
QOClSnEnkn0vUvanVI	NA	NA	-0.4007	8.01059	-5.40038	2.4364e-06	6.31797e-05	4.35284
K2KmjXd6brhQjgjkig	RPS11	ribosomal protein S11	-0.401146	12.0583	-3.53466	0.000962409	0.00768019	-1.42489
NuEU.VOBFXqK05dJ3k	NA	NA	-0.402089	7.86609	-5.48945	1.80389e-06	4.93714e-05	4.64704
NR0YqfUe55ZXfDPRQw	NA	NA	-0.403356	7.76746	-6.35618	9.44373e-08	4.31004e-06	7.54388
BJIHip6jPXTrpJnTJg	STMN3	stathmin-like 3	-0.405056	8.9184	-3.83925	0.000385254	0.00378584	-0.553789
liEl6uEi4h3N0AiCFc	PTPLAD2	protein tyrosine phosphatase-like A domain containing 2	-0.40537	8.88214	-2.74703	0.00863468	0.0415836	-3.4723
ueUo6HZ50_SlIwEfHk	EIF3H	eukaryotic translation initiation factor 3, subunit H	-0.405587	8.80972	-7.62825	1.2492e-09	1.10604e-07	11.8107
NxR5AuOgCrogSqLJSk	CHP	calcium binding protein P22	-0.40681	9.01425	-4.90495	1.27604e-05	0.000247764	2.73658
TkqV21q7lUDAdKBlWs	RPL18A	ribosomal protein L18a	-0.409159	12.5237	-4.09605	0.000173936	0.00202635	0.208238
WD8V6UI1kKWVqB54Z8	RPS9	ribosomal protein S9	-0.40999	10.7179	-3.53846	0.000951667	0.00760818	-1.41425
QT9BWop4r5Li6I_xR4	NUBPL	nucleotide binding protein-like	-0.410612	9.23131	-2.78351	0.00785033	0.0386149	-3.38506
QnXJTIn1.UgV9R5UO4	PIK3IP1	phosphoinositide-3-kinase interacting protein 1	-0.410875	8.83023	-3.74501	0.000513163	0.00467512	-0.82735
imXQeeVevg73fjLnoU	ULK1	unc-51-like kinase 1 (C. elegans)	-0.411011	8.92597	-4.33964	8.04294e-05	0.00107321	0.951236
6RCMCsuu7dhVNJd0VE	STAT5B	signal transducer and activator of transcription 5B	-0.411405	8.26215	-6.97582	1.13968e-08	7.50237e-07	9.62798
01a6XeSlQtNdK0l6C4	NA	NA	-0.412309	7.99912	-5.31981	3.19567e-06	7.76254e-05	4.0875
91Z.tRpirdZ6xlpeSA	TSPO	translocator protein (18kDa)	-0.413373	9.35393	-3.68311	0.000618481	0.00540043	-1.0051
6em9RFJelBOEAV7dx4	NA	NA	-0.413848	8.63781	-2.96284	0.00486815	0.0266724	-2.94464
fv75zaocQ6Uba3q7ws	NA	NA	-0.415471	12.8214	-4.5143	4.58537e-05	0.000681761	1.49456
l6VkQfVXanUeUrSOec	MED25	mediator complex subunit 25	-0.417085	8.51816	-3.71226	0.000566525	0.00504375	-0.921588
lCiieaASejheCuie1Q	NA	NA	-0.418526	8.84578	-3.96845	0.000258861	0.00277309	-0.17333
EQl6SwNYM1IFeFeW7E	NA	NA	-0.41873	8.67714	-2.69475	0.00988561	0.0456942	-3.59592
BlfR1ReeUC1e5w6jxA	FAM53C	family with sequence similarity 53, member C	-0.419789	9.13955	-4.71429	2.39063e-05	0.000407835	2.12616
ZrdJSVyIeffu.u097U	CAMLG	calcium modulating ligand	-0.419808	8.9593	-5.80859	6.11282e-07	1.96811e-05	5.70794
W_BUopor5rhXUn6kE4	NA	NA	-0.420313	9.66998	-2.89783	0.00579943	0.0305826	-3.10646
fX_a1S1Csp67TLfdHU	WLS	wntless homolog (Drosophila)	-0.422295	8.34372	-3.5792	0.000843553	0.0068996	-1.29994
l7rgikgWK2olT47eJc	C7orf59	chromosome 7 open reading frame 59	-0.424139	9.63434	-4.31094	8.81479e-05	0.00115968	0.862786
WlNSHighWgHyqUbiUU	NA	NA	-0.425154	11.9889	-4.17074	0.000137526	0.00166233	0.434119
xzdJH_op4JKSNH4r6g	NA	NA	-0.425338	8.26474	-4.25237	0.000106214	0.00134345	0.682973
T3OZey1ScVKKeCSjDY	ALPP	alkaline phosphatase, placental	-0.426197	10.4005	-2.72202	0.00921354	0.0435076	-3.53164
Z3l6V55V14N2zjrRLU	MKNK2	MAP kinase interacting serine/threonine kinase 2	-0.426235	8.2827	-7.19888	5.33818e-09	3.89914e-07	10.3764
9.9X1ppd1qVIJ30LaU	NA	NA	-0.428027	8.21153	-5.69987	8.84471e-07	2.70973e-05	5.34548
T5J7xAFL664QgaaxWo	NA	NA	-0.428945	9.72646	-3.27464	0.0020462	0.0136321	-2.13628
r3a619VkpK7ShaXDAQ	C11orf2	chromosome 11 open reading frame 2	-0.42896	8.86212	-4.37656	7.14632e-05	0.000977198	1.06539
u_VFUJ_oJu.uXs_UKo	NA	NA	-0.429451	9.98852	-6.04476	2.7345e-07	1.00462e-05	6.49805
uQbXq1wt7p2zZQnYAo	NA	NA	-0.430793	12.4487	-4.92892	1.1787e-05	0.000231658	2.81384
0jUFQqQqTXqA5TQugc	GPX4	glutathione peroxidase 4 (phospholipid hydroperoxidase)	-0.434781	9.39027	-4.37852	7.10147e-05	0.000973319	1.07147
KA.52CX0tb5oomJ6GU	NA	NA	-0.434911	11.6376	-3.89057	0.000329177	0.0033462	-0.403409
HneP1qkl.SOaSExBF4	CERK	ceramide kinase	-0.435076	8.42754	-6.47922	6.20316e-08	3.07691e-06	7.95773
6RCOmeAkCCgnXl3Xgk	NA	NA	-0.435246	7.88616	-5.35095	2.87782e-06	7.15736e-05	4.18995
NZdB55V6_Dvd_MuehU	ULK1	unc-51-like kinase 1 (C. elegans)	-0.43642	9.12315	-4.54069	4.20963e-05	0.000636585	1.57737
Nfp52erfo7avYUfpY4	NA	NA	-0.43677	12.6409	-6.1789	1.73017e-07	7.01095e-06	6.94811
E1CVE.UC0VUGbXdEW0	ADAM19	ADAM metallopeptidase domain 19	-0.437806	9.22237	-3.56768	0.000872856	0.00707717	-1.33232
rTUh4oIVoB8qlG4lGk	RPL27A	ribosomal protein L27a	-0.438107	11.8018	-4.05221	0.000199499	0.0022559	0.0765247
0L0eFF20IVEUi3W5Jo	NA	NA	-0.438528	12.9338	-4.14056	0.000151248	0.00179842	0.342612
326SBok0lIV77qb7TQ	MAST3	microtubule associated serine/threonine kinase 3	-0.438609	8.6911	-4.99816	9.36804e-06	0.000190022	3.03759
u5Kldtau5VAwHSgZVo	RPL18A	ribosomal protein L18a	-0.43888	12.4144	-4.6027	3.44168e-05	0.000546093	1.77256
oNQKXoEQ6x0AEyeXao	PYGL	phosphorylase, glycogen, liver	-0.439043	9.65913	-3.21875	0.00239769	0.0154338	-2.28493
W0Cc9dJ1KnF5je7_d4	RPL6	ribosomal protein L6	-0.439775	11.269	-4.3857	6.93994e-05	0.000957106	1.0937
T9E_lC807U1kUJ5IEI	NA	NA	-0.440162	13.1876	-4.60083	3.46262e-05	0.000548189	1.76668
f.NCAKuqORNZlCKCSg	NA	NA	-0.440786	8.05512	-7.48195	2.04635e-09	1.73381e-07	11.3232
ohuvTuAjlLpBI.lHYU	NA	NA	-0.442147	7.71527	-5.68088	9.43324e-07	2.85058e-05	5.28231
iWhfSf_qf4j7iFX7VQ	NA	NA	-0.442309	8.06733	-4.73074	2.26516e-05	0.000389432	2.17852
xjeW0eq6QTXq1wt7p0	NA	NA	-0.443946	12.5687	-5.87006	4.95927e-07	1.65696e-05	5.91323
ZpKhihAzo4roi6gkok	CD27	CD27 molecule	-0.44575	8.26157	-7.43129	2.42859e-09	1.991e-07	11.154
rAeQlJPFXqFPeNNdHo	NA	NA	-0.445956	9.06496	-4.45075	5.63004e-05	0.000802711	1.29593
fRVCSxn563C3wVSh0g	NA	NA	-0.447134	8.30221	-4.61358	3.32184e-05	0.00052851	1.80693
x__CSUetd_.VeSGioU	ZNF746	zinc finger protein 746	-0.449789	8.6116	-6.3324	1.0243e-07	4.60364e-06	7.4639
f41OLHEliKVUFU1F0c	NA	NA	-0.450377	8.39317	-7.82506	6.44649e-10	6.30687e-08	12.4642
3uSpXbWruVQMB0oGVY	RPL18A	ribosomal protein L18a	-0.451673	12.4607	-5.07275	7.30877e-06	0.000152084	3.27961
QrxUd7UdUynEgAtEJk	RPL15	ribosomal protein L15	-0.454013	9.62665	-4.04694	0.000202811	0.00228604	0.060721
omv.t6Sn1A.lAPCb0s	RELL1	RELT-like 1	-0.454016	8.22937	-5.34131	2.97275e-06	7.35215e-05	4.15821
iHewoL1QMQHzBVJ7rc	NA	NA	-0.454266	7.82646	-5.28513	3.59067e-06	8.53471e-05	3.97358
QtTWRQnkgQok7j4pXo	NA	NA	-0.455404	13.0202	-4.56848	3.8467e-05	0.000593333	1.66472
N7pDE5QXqXrowUEI6o	DHRS7	dehydrogenase/reductase (SDR family) member 7	-0.455815	10.0634	-4.83726	1.59575e-05	0.000292617	2.51902
cWqPBSbzQUgnAo44r4	LDHB	lactate dehydrogenase B	-0.456967	8.7876	-3.81981	0.000408824	0.00396248	-0.610504
xJ4jblHkdCXrhImAdY	NA	NA	-0.45774	10.555	-2.80085	0.00750104	0.0371503	-3.3433
61JLrT2EGAtMWyAI6Y	RPL23	ribosomal protein L23	-0.458959	8.11241	-4.1385	0.00015223	0.00180676	0.336389
lpOLyoh4Is_yHsTuX0	TP53INP1	tumor protein p53 inducible nuclear protein 1	-0.459892	8.24054	-5.45287	2.0411e-06	5.45156e-05	4.52609
90JSC13C35SxCst_4I	TMX4	thioredoxin-related transmembrane protein 4	-0.460167	8.25763	-5.27221	3.74994e-06	8.84208e-05	3.93116
N1ycfqKeK6iD50JUos	USP49	ubiquitin specific peptidase 49	-0.460626	9.36612	-2.69607	0.00985203	0.0456104	-3.59282
opeKpk_0MCRJ6eIeQA	RPL35	ribosomal protein L35	-0.460987	9.8926	-3.85125	0.000371368	0.0036759	-0.518713
9OpMrCaCrElDlYOUiA	RPL19	ribosomal protein L19	-0.461828	11.9378	-5.61632	1.17421e-06	3.41426e-05	5.06767
9WI0RR5HUF6gGS4h7k	TNFSF14	tumor necrosis factor (ligand) superfamily, member 14	-0.463291	9.49587	-3.82339	0.000404384	0.0039302	-0.600077
KeeRO8i1Vi3dZ1Cujg	PABPC4	poly(A) binding protein, cytoplasmic 4 (inducible form)	-0.463668	9.10967	-6.06021	2.59417e-07	9.63053e-06	6.54983
KpRe1Fu6lue7XztPsM	MXD4	MAX dimerization protein 4	-0.463988	8.68389	-5.31722	3.2236e-06	7.7983e-05	4.079
3R1_XvXjn_FX.MjSLk	NA	NA	-0.464034	8.35443	-6.15403	1.88343e-07	7.51107e-06	6.86463
HLqYuWl_Wl3iQhLkXQ	NA	NA	-0.464842	7.92053	-7.62444	1.26533e-09	1.11475e-07	11.798
Nee665U3z14x54l6q4	SORL1	sortilin-related receptor, L(DLR class) A repeats containing	-0.466165	9.81764	-3.12365	0.00313031	0.0190683	-2.53417
Qn52erfo7avYUfpY6g	NA	NA	-0.46749	12.5527	-5.94215	3.87959e-07	1.34179e-05	6.15436
Z3lXXQiQCQO_rgae.U	PABPC1	poly(A) binding protein, cytoplasmic 1	-0.467508	11.2253	-4.39247	6.79079e-05	0.000941151	1.1147
fSqP6p.fgIS1CV6MOc	RPL13	ribosomal protein L13	-0.467975	8.51482	-4.60243	3.44469e-05	0.000546093	1.77171
fiiXWWXWUHWShVlqCw	NA	NA	-0.469083	7.80568	-5.47227	1.91165e-06	5.16028e-05	4.59024
xT3qHFuCXosqImL_ok	ARAP3	ArfGAP with RhoGAP domain, ankyrin repeat and PH domain 3	-0.469711	8.73867	-4.34621	7.87558e-05	0.00105654	0.971539
3_SWQV7T7SKD6Ss9WM	NA	NA	-0.47103	9.96042	-3.78531	0.000454111	0.00427089	-0.710779
0eqkpnufe4rr8n.n9g	CBX7	chromobox homolog 7	-0.472935	8.32071	-8.88724	1.92517e-11	2.86479e-09	15.934
fG6ilCJP2dH5410qEU	ORM1	orosomucoid 1	-0.474061	7.81245	-4.48243	5.08303e-05	0.000742047	1.39482
xKx56loK66_xnuCk0E	NA	NA	-0.474637	12.454	-4.87699	1.39963e-05	0.000267653	2.6466
B4XOsuceR1JSpBIuIU	ZNF223	zinc finger protein 223	-0.475231	8.63608	-3.91395	0.000306324	0.00316291	-0.334563
fpSuSF_qgh.AUXL3VY	PTAFR	platelet-activating factor receptor	-0.475573	8.64777	-5.80176	6.25658e-07	2.00709e-05	5.68512
loU94010ehlEqkIq68	NA	NA	-0.478938	8.92143	-5.32522	3.13801e-06	7.64345e-05	4.10531
EqT7npVH9Hpffr.qqA	IL1R2	interleukin 1 receptor, type II	-0.482261	8.87443	-4.6438	3.01023e-05	0.000492199	1.90247
ZhZqOrtpuFKXidXt3U	RPLP0	ribosomal protein, large, P0	-0.485333	8.22478	-6.24815	1.36582e-07	5.79997e-06	7.18073
rKea7eecd1ifZDllQo	NA	NA	-0.485683	11.8211	-3.65712	0.00066865	0.00575058	-1.07928
KAAgkL3gvR34_RUV7I	NA	NA	-0.485771	9.26519	-4.16256	0.000141123	0.00169195	0.409273
r06WV0hV_4JUI20AIg	NA	NA	-0.486314	12.225	-6.09657	2.29152e-07	8.76419e-06	6.67178
oyuJIKsSUOVg5SIK0Q	NA	NA	-0.487463	11.9586	-5.2779	3.67899e-06	8.70955e-05	3.94983
uvnNqhxDpRtrervC50	NA	NA	-0.49025	12.5586	-4.63438	3.10412e-05	0.000501989	1.87267
6yQdKl6g_6pDW98qHo	OAZ2	ornithine decarboxylase antizyme 2	-0.49062	8.76747	-5.45745	2.00978e-06	5.38414e-05	4.54123
9VN9ecwO6u46ejeqSU	MFNG	MFNG O-fucosylpeptide 3-beta-N-acetylglucosaminyltransferase	-0.490886	9.29223	-5.63916	1.08673e-06	3.20197e-05	5.14355
TUWd9qaSQXiPARSEV8	TMEM91	transmembrane protein 91	-0.491957	9.06435	-3.50878	0.00103869	0.00814936	-1.49711
xpa.LhVOHxJa98XfK4	TST	thiosulfate sulfurtransferase (rhodanese)	-0.492372	8.75765	-5.40033	2.43685e-06	6.31797e-05	4.35266
TC6K_S4jZhHkdyXqSw	NA	NA	-0.493749	9.31098	-2.68401	0.0101624	0.0466689	-3.6211
oFRodet4lQwIe8PXQA	NA	NA	-0.501536	12.0773	-4.29644	9.23202e-05	0.00120295	0.818165
uLCo2CE.QPnN1N6njU	ZNF281	zinc finger protein 281	-0.505795	8.3915	-4.54822	4.1081e-05	0.000624967	1.60102
0pBqCG1CXwE0u5bOtQ	IDS	iduronate 2-sulfatase	-0.505885	8.33431	-7.85364	5.85739e-10	5.86003e-08	12.5589
ueYvkyegvQ50tcX6dU	RPL22	ribosomal protein L22	-0.505901	8.87149	-7.54145	1.6739e-09	1.43891e-07	11.5216
K79dQgWQJTboCJ5UHo	RPL32	ribosomal protein L32	-0.507487	11.8878	-5.09259	6.84083e-06	0.00014404	3.34415
oowjQ5XTwJJa7A74l8	RPLP1	ribosomal protein, large, P1	-0.508101	12.7927	-5.59589	1.25836e-06	3.59985e-05	4.99983
csnc4T47pQrQRXj2l4	NA	NA	-0.512305	12.4368	-5.75293	7.38602e-07	2.33557e-05	5.52228
chKa5pdQnVwjXLbWAM	NA	NA	-0.523625	9.4824	-4.34255	7.96837e-05	0.00106574	0.96023
3eooU6i470Zd4S4DGY	EIF3F	eukaryotic translation initiation factor 3, subunit F	-0.52779	9.59541	-6.21085	1.55133e-07	6.46377e-06	7.05543
rURSUXUU5bgv4VSIjQ	NA	NA	-0.528197	8.15375	-6.18959	1.66814e-07	6.80631e-06	6.98402
3aPijtFVNV3hJHZKCo	RPS14	ribosomal protein S14	-0.528728	10.7745	-4.85857	1.48742e-05	0.000278133	2.58741
BIKKJ54BJ6GF4K6J7U	NA	NA	-0.529369	9.34495	-4.5638	3.9056e-05	0.00059983	1.64999
BdSVG93eXuJS3L144U	ANPEP	alanyl (membrane) aminopeptidase	-0.530473	8.47225	-4.02147	0.000219563	0.00243763	-0.0154475
3ioggwJJ5eiXPRzvz4	TUBA4A	tubulin, alpha 4a	-0.536791	8.94891	-3.95217	0.000272235	0.00287805	-0.221596
Qkun0egA67pyT9X_LQ	HOPX	HOP homeobox	-0.536938	7.99446	-4.66294	2.8279e-05	0.000470643	1.9631
xfpRznNNC.WeFHi2lo	NA	NA	-0.537483	12.3319	-6.36458	9.17655e-08	4.20474e-06	7.57213
B3_oNht0Ir3U66xKOk	PRDX5	peroxiredoxin 5	-0.539397	10.048	-4.06788	0.000189969	0.00217592	0.123528
KQgaaxWrrwH2QDlyMs	NA	NA	-0.540198	9.69499	-4.55172	4.06169e-05	0.000618971	1.61202
KrSBbx7g4uCNeihXqU	MKNK2	MAP kinase interacting serine/threonine kinase 2	-0.544277	10.1917	-4.81206	1.73396e-05	0.000312677	2.43824
KXWGm3UpVAaXWtrqfc	NA	NA	-0.546396	8.39864	-4.92179	1.20686e-05	0.0002365	2.79085
T1oqmIq7G0E0tFWM64	LTB	lymphotoxin beta (TNF superfamily, member 3)	-0.546603	9.38712	-4.45076	5.62993e-05	0.000802711	1.29595
ua7eec91ifZDllwoYQ	RPS25	ribosomal protein S25	-0.549421	11.498	-3.81582	0.000413834	0.00399728	-0.622135
6SseepaCuuvsZ7gpNA	NA	NA	-0.549962	12.0663	-4.44051	5.81893e-05	0.000824332	1.26401
T1JNZLsApVu7iqhudE	NA	NA	-0.551485	8.23533	-5.2724	3.7476e-06	8.84208e-05	3.93177
QVuhFUheYKONlYwIaM	MATK	megakaryocyte-associated tyrosine kinase	-0.55166	8.45187	-4.38731	6.90398e-05	0.000952889	1.09872
0SteudjrYpTdetZemk	NA	NA	-0.552215	10.8203	-4.50436	4.73522e-05	0.000699343	1.46343
x6d5nFc6U6l0EKlEK4	NA	NA	-0.552918	9.45949	-5.42901	2.21223e-06	5.83817e-05	4.44729
BBQ4gol4nnoFz1s4HQ	NA	NA	-0.553698	8.32107	-4.53343	4.30986e-05	0.000648971	1.55457
c.nYJfS1vkiiYvoZR4	NA	NA	-0.554268	11.6917	-4.90668	1.26876e-05	0.000246621	2.74215
iU9KCp6qLu7pDAn4KQ	ABTB1	ankyrin repeat and BTB (POZ) domain containing 1	-0.554652	9.87092	-4.38279	7.00486e-05	0.000963808	1.08471
TAKSScUIBSVeAIJeSA	NA	NA	-0.558494	11.8299	-4.7705	1.98795e-05	0.000349232	2.30535
lmXUpQgoovTQh.NQoo	NA	NA	-0.558789	10.6069	-3.57063	0.000865256	0.0070252	-1.32403
QHF6f11kJo4EUlfUik	NA	NA	-0.559075	12.0519	-5.22236	4.43256e-06	0.000101761	3.76775
ErXh0AVLiqjv.UoQuA	EMR3	egf-like module containing, mucin-like, hormone receptor-like 3	-0.559443	8.06148	-10.0642	4.54234e-13	9.353e-11	19.6343
KGQsQrgnrogmpvW4jU	GLTSCR2	glioma tumor suppressor candidate region gene 2	-0.559602	11.4081	-5.38735	2.5458e-06	6.55246e-05	4.30987
0kneCOQLirZ7eVPjIo	NA	NA	-0.561111	8.43977	-5.56497	1.39727e-06	3.95885e-05	4.89723
cZNeXsjpaoKdyAKpk8	SLC25A6	solute carrier family 25 (mitochondrial carrier; adenine nucleotide translocator), member 6	-0.562414	9.43926	-6.43324	7.25795e-08	3.53087e-06	7.80307
leK5Horgtnn3melVCM	NA	NA	-0.565355	8.28523	-7.91946	4.69867e-10	4.83745e-08	12.7767
EoIKJ8OUoEj.kvrqt0	RPL3	ribosomal protein L3	-0.567574	12.0461	-5.68335	9.35478e-07	2.83655e-05	5.2905
o6HA5319Io81qk3HQ4	RPS29	ribosomal protein S29	-0.568626	11.4972	-3.23261	0.00230559	0.0149763	-2.24823
3VS2AnXl.aWf6SlSdc	NA	NA	-0.569659	9.07164	-3.79641	0.000439043	0.00415752	-0.678579
ipQqLUrrpe3i7w45f4	PRDX5	peroxiredoxin 5	-0.570547	9.05246	-4.34366	7.94015e-05	0.00106296	0.963655
rGoJJeJ56Bc.XOD06Q	NA	NA	-0.570729	8.51201	-4.12462	0.000159018	0.00187726	0.294434
WmdnFIDXFjCVNuHQB0	RPS16	ribosomal protein S16	-0.572737	12.2865	-6.15325	1.8885e-07	7.51107e-06	6.86199
0BFePaXjoiCCkzvYek	NA	NA	-0.572923	12.3244	-6.29049	1.18195e-07	5.20645e-06	7.32301
6tA.FelCNZCllageeE	RPS9	ribosomal protein S9	-0.57497	10.2965	-4.84391	1.56112e-05	0.000287443	2.54036
3aXlKLggJ.iQs615Y4	NA	NA	-0.574992	7.9636	-5.56994	1.37394e-06	3.90526e-05	4.91372
3j3KZ9KJZl8K5ITpQs	NA	NA	-0.575384	8.66865	-4.58111	3.69197e-05	0.000575	1.70451
0ap5HlFepB9lClF.jk	NA	NA	-0.575724	12.1078	-4.97337	1.01717e-05	0.000203526	2.95739
QSX3qJTp9868eFUqng	NA	NA	-0.576993	8.72225	-5.05103	7.85733e-06	0.000162925	3.20903
6XAIzOZ39X2u5R4I14	NA	NA	-0.577283	8.4027	-7.19087	5.48523e-09	3.96459e-07	10.3496
WOhFJRuSXNCelKtFis	NA	NA	-0.577401	9.1436	-7.6955	9.96123e-10	9.18716e-08	12.0343
3UIToHu90KvO6pup3U	C20orf3	chromosome 20 open reading frame 3	-0.578557	8.63084	-5.664	9.98938e-07	2.9931e-05	5.22614
fdXvu97FLk4BV7RM1U	RPS23	ribosomal protein S23	-0.57856	8.32006	-5.15946	5.47161e-06	0.000120377	3.5621
fqu9WlNJElzhT5BBd0	CARHSP1	calcium regulated heat stable protein 1, 24kDa	-0.578609	8.617	-6.86429	1.6665e-08	1.0141e-06	9.25316
uOqx.KnueC.nnlHolE	NA	NA	-0.578659	9.87564	-4.98517	9.78098e-06	0.00019682	2.99556
HAtMxeK5FojlH3lelU	NA	NA	-0.57915	9.36745	-6.08499	2.38383e-07	9.02886e-06	6.63296
ct.W6J7ZTgrYnuS.yY	RPL24	ribosomal protein L24	-0.581257	10.2887	-4.87425	1.41235e-05	0.000269502	2.6378
EWX22SIXfnq.QQG5T4	ITM2A	integral membrane protein 2A	-0.581538	8.71316	-5.3547	2.84176e-06	7.09758e-05	4.20228
xnrnj5EYbo1TYnr7fc	NA	NA	-0.585654	11.7843	-5.32614	3.12832e-06	7.63034e-05	4.10833
6vSOEmFl.09VWUXsdE	TBL1X	transducin (beta)-like 1X-linked	-0.585723	8.77355	-5.38642	2.55384e-06	6.55589e-05	4.30678
Tg9DhRdtCFRlIt1OWY	NA	NA	-0.586765	11.8054	-4.8967	1.31135e-05	0.000254063	2.71001
cqXx19Eja7DbiINE64	NA	NA	-0.587487	8.24354	-6.68906	3.02966e-08	1.70858e-06	8.66382
f9umu8eFepuuHNsel8	ICAM3	intercellular adhesion molecule 3	-0.588208	11.571	-4.48523	5.03728e-05	0.000737191	1.40357
N3FmF00lGOI7.WE3EI	NA	NA	-0.589857	8.61522	-4.19836	0.000126041	0.0015478	0.518076
ieUE4oSCh67hVcVWVc	NA	NA	-0.590314	10.5606	-6.51856	5.42304e-08	2.75161e-06	8.09011
QVepzTeTqnqtde5z_w	NA	NA	-0.592441	9.53957	-6.54857	4.89467e-08	2.53435e-06	8.1911
unVKIBCfhRznNNC.Wc	NA	NA	-0.592885	12.214	-5.74617	7.55765e-07	2.38133e-05	5.49974
BdoNEkh3UZUnJ3ZdHs	NA	NA	-0.593574	9.55075	-3.46972	0.00116481	0.00889457	-1.6055
TbpFP1boRU6itOXjdw	NA	NA	-0.593621	11.3223	-4.24857	0.000107503	0.00135782	0.671341
BRz_692WpJ_iCmQx3U	NA	NA	-0.593914	10.798	-4.46083	5.45006e-05	0.000782722	1.32736
QSm126C4TbfwFebpDU	RPLP0	ribosomal protein, large, P0	-0.596851	11.2309	-4.41842	6.24765e-05	0.000876651	1.19527
r76edR7XUflxKKAJCM	NA	NA	-0.596911	8.80318	-3.5226	0.000997261	0.00790134	-1.45857
HkBlK598pbnWC001r8	NA	NA	-0.598387	9.17846	-3.23974	0.00225949	0.0147316	-2.2293
NeYA9pSr3V37Zt70BY	NA	NA	-0.598634	8.32022	-4.14657	0.000148414	0.00176978	0.360806
QZNzuleozr.9ei_Eek	UXT	ubiquitously-expressed transcript	-0.600549	9.45533	-8.11771	2.42431e-10	2.71707e-08	13.4306
B6VXq3t1AAldigU0IQ	LOC729742	similar to hCG1812832	-0.601913	9.47686	-6.26075	1.30832e-07	5.58483e-06	7.22305
ZErld7lz0kvVx4IeiY	NA	NA	-0.602619	11.4655	-4.25992	0.000103698	0.00131917	0.706082
WorgtrlH3lelVCNpVc	RPL12	ribosomal protein L12	-0.608026	10.3125	-6.19097	1.66029e-07	6.78991e-06	6.98866
66sTpWS6f_VSAqgKBE	EEF2	eukaryotic translation elongation factor 2	-0.608257	10.9642	-5.71854	8.30141e-07	2.57897e-05	5.40766
9Yi5X3jg7rnqu.OkLQ	RPS27A	ribosomal protein S27a	-0.610629	11.7084	-5.69749	8.91637e-07	2.72696e-05	5.33757
QLlilOLkTlinNKlfuA	NA	NA	-0.618882	8.91401	-7.05451	8.71898e-09	6.02386e-07	9.89224
o9S.Ipo.rbobrSUXSw	RPS10	ribosomal protein S10	-0.61947	10.8735	-4.31802	8.61789e-05	0.0011363	0.884588
0Xgknpy6fPH7h6F3rU	RPL6	ribosomal protein L6	-0.621535	9.93706	-5.89299	4.58675e-07	1.55598e-05	5.98991
TO1NZFCeSBCibuPilc	NA	NA	-0.621837	12.6629	-5.81096	6.06373e-07	1.95586e-05	5.71585
36iZWDenaSDN32EJEU	NA	NA	-0.622019	9.1665	-2.72819	0.00906764	0.0430773	-3.51705
HpQgqXx19Eja7DXiI8	RPS13	ribosomal protein S13	-0.622164	11.0041	-6.11471	2.154e-07	8.32818e-06	6.73263
fdeddcCUCUCYKfwKUM	NA	NA	-0.622747	8.08266	-5.48138	1.85373e-06	5.05791e-05	4.62036
iL355kn6IK5DHdSdRY	NA	NA	-0.626104	9.83521	-4.88396	1.36777e-05	0.000262979	2.66901
ulN3CFxJxeFVhd6CPs	NA	NA	-0.626189	11.8076	-4.88772	1.35086e-05	0.000260295	2.68111
ucRlln7nklO3cuNXgA	NA	NA	-0.626733	11.9472	-4.91643	1.22847e-05	0.000240372	2.77357
oivK6CxSkuElFeiiCI	NA	NA	-0.627135	11.3506	-4.75352	2.10202e-05	0.000366004	2.25113
iHj9NdC.WRLlZQCztQ	NA	NA	-0.627531	10.0923	-5.16375	5.3937e-06	0.000119092	3.5761
luitCWiONJRxepi91M	NA	NA	-0.627748	10.6998	-6.56793	4.5816e-08	2.40032e-06	8.25622
uqdSIKVm3AwJlJko4A	LIME1	Lck interacting transmembrane adaptor 1	-0.627802	9.41292	-5.85149	5.28285e-07	1.75843e-05	5.85118
WRGHIsUrrq2eXlZVQM	NA	NA	-0.627811	10.2604	-6.50081	5.76197e-08	2.89045e-06	8.0304
itdC_l1UpUkGl3aaX8	NA	NA	-0.628222	8.42186	-6.05134	2.67384e-07	9.88484e-06	6.5201
BmAPaUq92d_27e9AWk	RPS29	ribosomal protein S29	-0.628846	11.1506	-3.62864	0.000728098	0.0061192	-1.16022
9SSCdJIx6EFTVfLIpE	NA	NA	-0.629383	8.72082	-5.76617	7.06105e-07	2.2368e-05	5.56642
9fOXkVKpHpNt1kXuVA	NA	NA	-0.630345	12.1789	-5.6725	9.70544e-07	2.91374e-05	5.25441
ZfEgo719KKCSRwCR3g	RPS27	ribosomal protein S27	-0.631952	9.19153	-3.15725	0.00285022	0.0177094	-2.44666
loDOI8aJJkI_NICe6E	NA	NA	-0.634678	8.3601	-3.97267	0.000255497	0.00274536	-0.160796
fUQLhQgbiQlSkSWGWY	RPL36	ribosomal protein L36	-0.63517	10.2568	-6.97983	1.1242e-08	7.42808e-07	9.64147
B63gruauV3uXPSS9Xs	NA	NA	-0.637167	11.5877	-4.56309	3.91463e-05	0.000600696	1.64775
uEuAeFPShISlSPiuuU	NA	NA	-0.637557	10.1227	-5.52855	1.58054e-06	4.40066e-05	4.77649
HY1EuiFc8HHG_kee7k	NA	NA	-0.640204	8.09003	-8.4365	8.42796e-11	1.1055e-08	14.4748
NCHqpQEiS6uA61erhs	NA	NA	-0.640465	12.2818	-5.21513	4.54129e-06	0.000103467	3.74408
cQorwlQjVAq7SUQnY8	NA	NA	-0.640842	11.0043	-8.54613	5.87371e-11	8.06292e-09	14.8317
o5RKSV6hMoJ6iQoCrc	RPL13A	ribosomal protein L13a	-0.642031	10.0153	-5.84876	5.33216e-07	1.7682e-05	5.84205
TZmQSU6f8KMWgARW6I	RPS20	ribosomal protein S20	-0.642603	11.1425	-4.96339	1.05142e-05	0.000208729	2.92513
EdOgRNRCeCkhClZIJ0	NA	NA	-0.64389	11.185	-6.38966	8.42319e-08	3.93556e-06	7.65646
QXeZzuhPkEEKidHS6s	NA	NA	-0.644798	10.5661	-4.34836	7.82161e-05	0.00105087	0.97818
Zkrld7lz0kPVx4IeiY	NA	NA	-0.646306	11.5143	-4.21303	0.000120325	0.00148896	0.562775
HFBVDlKeZJggDiyEnY	NA	NA	-0.647608	9.18888	-5.33346	3.05233e-06	7.50703e-05	4.13238
uACCNZE0VF9aa1CFeY	NA	NA	-0.649067	9.76699	-5.37908	2.61772e-06	6.67934e-05	4.28261
lhC1QjlICkt1QoVFOQ	PPM1F	protein phosphatase, Mg2+/Mn2+ dependent, 1F	-0.650712	9.50495	-4.42049	6.20606e-05	0.000873474	1.20173
HlSI1AiV.iRRkII9Nk	NA	NA	-0.6521	11.1177	-5.19921	4.79008e-06	0.000107917	3.69199
WXRKSnAQu6LjSVSPa4	NA	NA	-0.654521	9.09781	-3.39825	0.00143444	0.0104139	-1.80208
okYY4rhLRpXpQbQT6g	RPLP1	ribosomal protein, large, P1	-0.654961	11.6862	-6.94381	1.27091e-08	8.15411e-07	9.52046
QElrAaDRs69.e6t7pE	DEF8	differentially expressed in FDCP 8 homolog (mouse)	-0.656293	9.25815	-5.62546	1.1384e-06	3.33202e-05	5.09803
WJeJ56Ac9XOD06TDK4	NA	NA	-0.65632	8.76682	-3.89852	0.000321226	0.00328044	-0.380018
QbYi5X3jg7rnou.OkI	NA	NA	-0.657316	11.6068	-5.65721	1.02222e-06	3.05143e-05	5.20355
lU4KXakRxiLECy6tnk	NA	NA	-0.661013	11.3419	-6.92322	1.36327e-08	8.62173e-07	9.45126
TSXd75dJ3UL1KfWtfI	CA4	carbonic anhydrase IV	-0.661387	8.15828	-6.91442	1.40477e-08	8.82115e-07	9.42168
HXRJod1GVJyd2XR5pc	NA	NA	-0.662557	9.9857	-3.41963	0.00134808	0.00996316	-1.7435
6CiQiQjRbhNYrl.dQA	NA	NA	-0.664362	8.77203	-6.81489	1.97221e-08	1.17688e-06	9.08706
fxYVSp4UUl3RopN87w	NA	NA	-0.665647	9.14961	-5.21626	4.52413e-06	0.000103406	3.74778
30l0SaHdRlScndl0cQ	NA	NA	-0.66661	9.77207	-3.81474	0.000415192	0.00400064	-0.625264
igvcIT47pQrQRbj_l4	NA	NA	-0.667069	8.14711	-5.40565	2.39356e-06	6.23079e-05	4.3702
Tc4QI7rQrQRXj2l46I	NA	NA	-0.668778	12.2712	-7.62873	1.24716e-09	1.10604e-07	11.8123
NKrUxbvvej1b7B8CoA	NA	NA	-0.669512	8.23798	-5.1097	6.46125e-06	0.000138017	3.39984
9NiLlfeODuueq786Qk	NA	NA	-0.670381	11.8661	-6.56428	4.63897e-08	2.42321e-06	8.24396
T56loK6K2xnuKk00.c	NA	NA	-0.672656	11.6431	-5.47494	1.8945e-06	5.13883e-05	4.59906
9469_epJ_iCm4x3UnU	NA	NA	-0.674508	9.65049	-5.44152	2.1208e-06	5.63047e-05	4.4886
WGaQ63TQnnolL3n3aQ	NA	NA	-0.676883	12.1641	-6.96925	1.16544e-08	7.61536e-07	9.60593
ZWSJ2aKQpYowog0iNM	NA	NA	-0.678605	7.95026	-9.11535	9.19551e-12	1.45388e-09	16.6641
66laXaXRIod1OVJyd8	NA	NA	-0.684005	9.42956	-4.33283	8.21979e-05	0.00109194	0.930238
0u1JUWXlh_7Tlcb6zA	EEF1B2	eukaryotic translation elongation factor 1 beta 2	-0.686113	8.45763	-4.91298	1.24259e-05	0.000242599	2.76244
HI1QKu0lkJ0H5cR7UU	NA	NA	-0.686516	8.96211	-6.86293	1.6742e-08	1.0153e-06	9.24861
xiz6Qn5S7F5a7p7pTc	NA	NA	-0.689277	8.66536	-5.25625	3.95625e-06	9.2302e-05	3.87882
Bohqovgi7pWT7Xr1Qw	CYP27A1	cytochrome P450, family 27, subfamily A, polypeptide 1	-0.691861	8.22675	-6.58013	4.39459e-08	2.31606e-06	8.29728
TFXqcU3k6p6rXXuc.s	NA	NA	-0.692019	9.84226	-8.13025	2.32518e-10	2.62257e-08	13.4719
Q_cW4BfxcjSU0l7QdI	EIF3L	eukaryotic translation initiation factor 3, subunit L	-0.692062	10.6809	-7.23856	4.66553e-09	3.53065e-07	10.5094
ZiRTqQlUmXM8KRP4MA	RPL10A	ribosomal protein L10a	-0.693472	10.93	-5.79444	6.41424e-07	2.04655e-05	5.6607
cf7oT5TVOQQQqJ0eLo	NA	NA	-0.693913	10.2668	-4.99076	9.60102e-06	0.000194525	3.01366
EwZeQYTqwjnkPbnlbo	C12orf57	chromosome 12 open reading frame 57	-0.695689	8.37893	-7.78839	7.29029e-10	7.01444e-08	12.3427
rMFE5ACCNZO0VF9KaU	NA	NA	-0.696698	9.08073	-5.97338	3.48792e-07	1.22548e-05	6.25891
0pSr3Z375u70BBaRrc	NA	NA	-0.698459	9.75084	-4.06539	0.000191451	0.00218763	0.116066
Q76eVKO6VIrkKJ6s0U	RPS14	ribosomal protein S14	-0.700954	11.0454	-5.4313	2.19521e-06	5.80192e-05	4.45485
iAAQl.b5eNllNOrbOY	NA	NA	-0.704656	9.47702	-6.71242	2.79747e-08	1.59285e-06	8.74241
B6l1aaXeSlQuteC0l0	NA	NA	-0.708631	8.74336	-5.52229	1.61432e-06	4.47362e-05	4.75578
KndNRThckboPZgnlAk	NA	NA	-0.708637	10.9427	-3.50995	0.00103511	0.00813929	-1.49384
Kw4B7J7HEJUUJ4Lp5U	NA	NA	-0.709619	8.44162	-4.23105	0.000113646	0.00141721	0.617789
WUZmAPaUq92d_2bedA	NA	NA	-0.710801	10.4069	-3.94537	0.000278016	0.0029252	-0.241724
[truncated: 122 more rows]

## Sheet: DEGs on Day2
Differentially expressed genes on Day 2 of influenza virus infection
[B.H. adjusted P value <0.05 in both year 2009-2010 and 2010-2011]
nuID	Gene Symbol	Gene Name	logFC	AveExpr	t	P.Value	adj.P.Val	B
oUL016nU_reU_ae0_Y	IFI27	interferon, alpha-inducible protein 27	4.67891	9.94992	24.0126	3.98288e-27	7.05288e-23	49.0972
rupwjK1x5AUVdTP1sU	IFI44L	interferon-induced protein 44-like	3.17186	9.51986	13.8606	9.17292e-18	5.41447e-14	29.8627
ijfUpc6MjSik0eKUok	IFITM3	interferon induced transmembrane protein 3	2.87998	11.5726	10.5224	1.16511e-13	1.28948e-10	20.889
fSohbtLKju5enuxurs	LY6E	lymphocyte antigen 6 complex, locus E	2.82205	11.2539	14.7755	8.75162e-19	7.74869e-15	32.0562
uF4JJC4mp6Ku5KGF70	ISG15	ISG15 ubiquitin-like modifier	2.48947	9.35416	10.4823	1.31688e-13	1.29552e-10	20.7714
N4OCV6LHOJqV4h6eeE	IFIT1	interferon-induced protein with tetratricopeptide repeats 1	2.46538	9.60475	10.9939	2.81328e-14	4.52888e-11	22.2513
iqLR_Of0rw0ic6ucSk	EPSTI1	epithelial stromal interaction 1 (breast)	2.41508	9.61334	12.9318	1.10377e-16	3.90912e-13	27.5219
NZ6BfqQoIO4kIsiIuU	RSAD2	radical S-adenosyl methionine domain containing 2	2.37194	8.89376	11.3174	1.07859e-14	2.12219e-11	23.1682
WneIYOc6nkjh98ij_U	IFI44	interferon-induced protein 44	2.33965	9.03175	13.273	4.37184e-17	1.93541e-13	28.3954
HFS7.KJOLlu7ubXtok	MX1	myxovirus (influenza virus) resistance 1, interferon-inducible protein p78 (mouse)	2.29018	11.0925	8.91644	1.81815e-11	8.25531e-09	16.0212
oid6lfUuflFcTHf7ek	OAS2	2'-5'-oligoadenylate synthetase 2, 69/71kDa	2.11697	9.89663	11.025	2.56398e-14	4.52888e-11	22.3401
9lUF6j54kqCf5O_dwo	IFIT3	interferon-induced protein with tetratricopeptide repeats 3	2.07306	9.45747	9.25409	6.12827e-12	3.50063e-09	17.0723
EEDSXrRSf9oEkiESKk	IFIT3	interferon-induced protein with tetratricopeptide repeats 3	2.07133	9.42888	12.0055	1.46875e-15	4.33478e-12	25.0688
0nhUk0lEd6voA7_Xvo	IFIT2	interferon-induced protein with tetratricopeptide repeats 2	1.9829	10.5433	9.2559	6.09289e-12	3.50063e-09	17.0779
Tpa8gVuHs93V_jFXOU	HERC5	hect domain and RLD 5	1.97135	9.50375	9.39259	3.93791e-12	2.68202e-09	17.4994
0B2unl2eOJ63mNeDqo	IFI6	interferon, alpha-inducible protein 6	1.96064	9.77329	9.39836	3.86615e-12	2.68202e-09	17.5172
0IiH14JJlUUJ0Il01k	OAS1	2'-5'-oligoadenylate synthetase 1, 40/46kDa	1.8692	8.93859	10.6156	8.77978e-14	1.03648e-10	21.1605
o3qVxJeiBeiDXEVEgU	XAF1	XIAP associated factor 1	1.86734	9.40624	11.5098	6.13857e-15	1.45983e-11	23.7064
fAEA0FqFUn.SB5KgEk	IFIT3	interferon-induced protein with tetratricopeptide repeats 3	1.74197	8.7483	9.46505	3.12731e-12	2.30744e-09	17.7219
H5lhjlSDUgf7c0d1UE	IFI6	interferon, alpha-inducible protein 6	1.72304	11.0813	8.77435	2.88425e-11	1.16078e-08	15.5747
N4YTYufXzonoklZcgU	IRF7	interferon regulatory factor 7	1.68753	9.87785	8.49483	7.19451e-11	2.45001e-08	14.6898
3Aq_iknpEIp4peng8U	OAS1	2'-5'-oligoadenylate synthetase 1, 40/46kDa	1.6842	8.8114	9.27809	5.67534e-12	3.46548e-09	17.1465
TpnrGwMhQ5Lyunf1CE	OAS3	2'-5'-oligoadenylate synthetase 3, 100kDa	1.67564	8.64031	10.027	5.34957e-13	4.76033e-10	19.4238
ivdSKCuggFOpKLKD4s	GBP1	guanylate binding protein 1, interferon-inducible	1.48708	9.30652	8.05708	3.05819e-10	8.08275e-08	13.2874
ukoevq3qjc6TUIS4R0	OASL	2'-5'-oligoadenylate synthetase-like	1.43297	8.62963	8.17663	2.05617e-10	5.68916e-08	13.6723
BhFLTHp0qVFnDl8OA0	TRIM22	tripartite motif containing 22	1.32767	9.17362	10.7103	6.59003e-14	8.97664e-11	21.4357
HlbQueVeXu3q.e_nv8	OTOF	otoferlin	1.27505	8.08912	6.85836	1.73609e-08	1.62659e-06	9.3679
055155VOJ7lC7lSp5M	MT1A	metallothionein 1A	1.26947	9.39944	6.44862	7.00996e-08	4.66663e-06	8.01345
Nk_t6ULcQ7VDNChBRU	GBP1	guanylate binding protein 1, interferon-inducible	1.23546	8.72896	8.00347	3.65565e-10	8.86771e-08	13.1144
3t9fhRTT15ePIqfXTo	SAMD9L	sterile alpha motif domain containing 9-like	1.21441	8.81582	10.0254	5.37648e-13	4.76033e-10	19.4189
oqeOni_zvHB_leHr7k	TMEM123	transmembrane protein 123	1.19372	10.0884	9.33512	4.72985e-12	3.10208e-09	17.3225
fp75V5VfrXlXIxJL8w	IFITM1	interferon induced transmembrane protein 1 (9-27)	1.18351	11.2357	8.40245	9.74914e-11	3.25732e-08	14.3955
fb3eXRMnxCUnogM6x0	EIF2AK2	eukaryotic translation initiation factor 2-alpha kinase 2	1.1661	8.98421	7.93682	4.56511e-10	1.07785e-07	12.8989
ikRLn9bpHkxDeKXXd0	STAT1	signal transducer and activator of transcription 1, 91kDa	1.14213	9.71238	8.25553	1.58338e-10	4.91902e-08	13.9255
6X_RJNfoqj2Qukle_M	PARP9	poly (ADP-ribose) polymerase family, member 9	1.13007	8.99953	10.4941	1.27007e-13	1.29552e-10	20.8062
lUECOC9XNxoCk4eopU	LAP3	leucine aminopeptidase 3	1.13006	8.86291	7.62676	1.28947e-09	2.40357e-07	11.8915
TpXkSunv37e87SKBLU	STAT2	signal transducer and activator of transcription 2, 113kDa	1.09863	9.80905	7.80164	7.17236e-10	1.53022e-07	12.4607
3XUk9LUqolGgFO9_fA	UBE2L6	ubiquitin-conjugating enzyme E2L 6	1.08958	10.972	7.58099	1.504e-09	2.74566e-07	11.7422
09kidveWWSQwJ1.lmA	TYMP	thymidine phosphorylase	1.07367	11.854	7.24924	4.60738e-09	6.08862e-07	10.6556
osGi.IlKnjn_u6Ukd4	TAP1	transporter 1, ATP-binding cassette, sub-family B (MDR/TAP)	1.06696	10.137	9.2372	6.46898e-12	3.57977e-09	17.0201
xqk3l6LxfU06cXnuv4	ZBP1	Z-DNA binding protein 1	1.06483	8.99445	6.68665	3.11475e-08	2.49575e-06	8.80058
QV59WEUl06DOQQdexU	SHISA5	shisa homolog 5 (Xenopus laevis)	1.03308	10.7405	8.71318	3.52044e-11	1.32638e-08	15.3818
uUK90R6Xqfq5UzKK3s	IFI35	interferon-induced protein 35	1.02619	8.82722	7.26634	4.3483e-09	5.8333e-07	10.7118
KZTRJ4H74jVbvHlzSQ	STAT1	signal transducer and activator of transcription 1, 91kDa	1.01491	10.7986	5.71117	8.62214e-07	3.11594e-05	5.58136
0PtPXs9FbUhfvRHdE4	CX3CR1	chemokine (C-X3-C motif) receptor 1	1.01328	10.2874	6.06981	2.54892e-07	1.21263e-05	6.76164
cl2ge4RVTfYfSLffUI	IRF7	interferon regulatory factor 7	1.00303	8.37093	6.87568	1.63676e-08	1.5752e-06	9.42509
Np5CejE6D0kR.3V3x4	SAMD9	sterile alpha motif domain containing 9	0.987388	8.72986	8.19936	1.90693e-10	5.52609e-08	13.7453
lkoEEjkoEp5EnSRBPU	GBP5	guanylate binding protein 5	0.968122	9.04065	6.43822	7.2628e-08	4.79887e-06	7.97908
T03kDulKfqgQ465ECk	IFIH1	interferon induced with helicase C domain 1	0.961915	8.32313	9.20533	7.16471e-12	3.73155e-09	16.9214
utE_0gSunnu65TYtXk	PARP12	poly (ADP-ribose) polymerase family, member 12	0.934367	8.67635	8.76429	2.98031e-11	1.16939e-08	15.543
ix1KUCgkUiUOgfjpXA	STAT1	signal transducer and activator of transcription 1, 91kDa	0.933499	9.21862	6.3543	9.66842e-08	5.78407e-06	7.70155
6suzRLLJdSv18KhBNc	TNFSF10	tumor necrosis factor (ligand) superfamily, member 10	0.92487	9.44603	6.50208	5.84208e-08	4.10522e-06	8.19027
BUnS0JZROVEF0Uiog8	FCN1	ficolin (collagen/fibrinogen domain containing) 1	0.908451	12.4579	6.02876	2.9312e-07	1.3482e-05	6.62621
EUAD7d6Qy8X1SMStVU	OAS2	2'-5'-oligoadenylate synthetase 2, 69/71kDa	0.907759	8.03221	9.01613	1.31703e-11	6.47834e-09	16.333
TR7dIiv9e52V793Sgk	CECR1	cat eye syndrome chromosome region, candidate 1	0.907532	10.484	6.37325	9.06362e-08	5.60845e-06	7.7642
NX9EfunjuDnhYBOiNU	IFI16	interferon, gamma-inducible protein 16	0.902607	9.65972	9.04388	1.20424e-11	6.09274e-09	16.4195
fet10n1c1MykSIpJP4	SIGLEC14	sialic acid binding Ig-like lectin 14	0.896318	9.64053	3.74107	0.000521245	0.00368178	-0.558911
36hSSRC9Xt9OqYszhU	SERPING1	serpin peptidase inhibitor, clade G (C1 inhibitor), member 1	0.88704	7.95755	6.57912	4.4929e-08	3.31501e-06	8.44506
iJedp7O.dkZ0Vn0uac	PRIC285	peroxisomal proliferator-activated receptor A interacting complex 285	0.886773	9.04205	7.11337	7.30094e-09	8.73548e-07	10.2087
N6FHU_U3F50FeGl30Y	SCO2	SCO cytochrome oxidase deficient homolog 2 (yeast)	0.884545	8.69198	7.67186	1.10819e-09	2.13302e-07	12.0385
uoJSuX8NR7BdEHULUQ	RNASE2	ribonuclease, RNase A family, 2 (liver, eosinophil-derived neurotoxin)	0.879129	8.7334	5.75288	7.48504e-07	2.83822e-05	5.71824
fctt136XSSd9XvfHr4	PHF11	PHD finger protein 11	0.874424	9.66763	10.7706	5.49556e-14	8.10961e-11	21.6098
cwpXkeAOQnSmWutvuE	PLAC8	placenta-specific 8	0.87335	9.96869	5.99743	3.26105e-07	1.45458e-05	6.52288
9Oe3u6BCbZDih3cShU	PLAC8	placenta-specific 8	0.873158	9.94708	6.03621	2.85783e-07	1.32478e-05	6.65077
TSKXWS0XDR3XXfXvU8	IL1RN	interleukin 1 receptor antagonist	0.870643	8.90519	7.71908	9.45806e-10	1.91088e-07	12.1923
BkH9RXlT.7AHktN_hc	MARCKS	myristoylated alanine-rich protein kinase C substrate	0.867358	10.2974	6.81351	2.02231e-08	1.78165e-06	9.21977
9qsESLlfOCi_iNeQoI	NA	NA	0.860722	7.94506	9.65788	1.69873e-12	1.30788e-09	18.3106
6VtKG_KH.YUPQV.lUU	CD14	CD14 molecule	0.855927	12.2013	6.01148	3.10875e-07	1.41153e-05	6.56922
xeS0eEuVKneq7d0ScM	HLA-F	major histocompatibility complex, class I, F	0.854716	11.6505	5.63753	1.10645e-06	3.71784e-05	5.34005
fcZTqE3D0iggrU7f6o	TNFSF13B	tumor necrosis factor (ligand) superfamily, member 13b	0.853708	10.3342	6.90974	1.45779e-08	1.43414e-06	9.53749
xpBLlSp3ju3dGm4C7g	HLA-H	major histocompatibility complex, class I, H (pseudogene)	0.851715	12.7185	6.48769	6.13566e-08	4.24415e-06	8.1427
EpBIouKLnnsjhBdT3M	SAT1	spermidine/spermine N1-acetyltransferase 1	0.847904	11.398	8.93593	1.70695e-11	7.95439e-09	16.0822
lo4foRHV6R4It4Eel4	HERC6	hect domain and RLD 6	0.843368	8.2046	8.81828	2.50021e-11	1.05413e-08	15.713
HdefXV5T01eVd1OCfg	OAS1	2'-5'-oligoadenylate synthetase 1, 40/46kDa	0.843045	8.32714	5.42507	2.26709e-06	6.47405e-05	4.64657
odbdZwAxgDyUpuumJE	XAF1	XIAP associated factor 1	0.835866	8.15442	6.33536	1.03133e-07	6.06739e-06	7.63892
HCnY15iCgut3lSXlF8	GRN	granulin	0.804603	9.79463	5.50165	1.75129e-06	5.24734e-05	4.89603
ulT0A438W6XlU5861U	DHRS9	dehydrogenase/reductase (SDR family) member 9	0.803373	8.89744	5.72596	8.20063e-07	3.02212e-05	5.62987
xhqv9fnXlKPALU4v34	CD68	CD68 molecule	0.801494	10.9826	6.3335	1.03788e-07	6.08566e-06	7.63278
WguiinKqUS_efTwTIo	PARP14	poly (ADP-ribose) polymerase family, member 14	0.796976	8.88126	6.76949	2.34918e-08	2.00963e-06	9.07435
rpB1LSBJIDCblvSrUg	TNFSF13B	tumor necrosis factor (ligand) superfamily, member 13b	0.790605	9.70308	6.54015	5.13109e-08	3.67027e-06	8.31618
iXpUnp.XtUDSUuzDSU	PLSCR1	phospholipid scramblase 1	0.788271	8.07991	8.23301	1.70586e-10	5.11989e-08	13.8533
x6CNIVJ18V_3lL7FKk	IFI30	interferon, gamma-inducible protein 30	0.783526	9.32624	6.94415	1.29688e-08	1.31983e-06	9.65102
ct0mK7AvvZZug7i7v4	ADM	adrenomedullin	0.773412	9.89116	7.28143	4.13188e-09	5.8333e-07	10.7613
0Vb3Klul.liHskiAGw	HES4	hairy and enhancer of split 4 (Drosophila)	0.76768	8.18038	4.87055	1.44156e-05	0.000261549	2.86332
Q1T_A_emeelo5P.i.s	MAFB	v-maf musculoaponeurotic fibrosarcoma oncogene homolog B (avian)	0.7654	8.51741	7.34832	3.29559e-09	5.16445e-07	10.9808
fpfV7SCqvukAlE8Qnk	GRN	granulin	0.762667	9.32718	6.03465	2.87308e-07	1.32837e-05	6.64562
ltevVv3UXIewF3YqSo	CDKN1A	cyclin-dependent kinase inhibitor 1A (p21, Cip1)	0.760532	8.74372	5.42463	2.27038e-06	6.47405e-05	4.64517
6V5WK54VD2eUAi7Q0g	SPATS2L	spermatogenesis associated, serine-rich 2-like	0.759103	7.88865	7.00936	1.03914e-08	1.13866e-06	9.8661
lF4JSEqSKbWeEDR1Tg	TMEM140	transmembrane protein 140	0.757139	9.68626	4.74884	2.15098e-05	0.00034439	2.47876
ipfoT8uHvJa1f0jUuk	MX2	myxovirus (influenza virus) resistance 2 (mouse)	0.756527	9.66343	4.66333	2.84492e-05	0.000419818	2.2104
W2teeilGrlER2tWE44	UBE2L6	ubiquitin-conjugating enzyme E2L 6	0.755832	8.99202	6.85231	1.77221e-08	1.63111e-06	9.34791
Eo.0e9wnVbhe64pgKg	SP110	SP110 nuclear body protein	0.74774	9.76459	6.55456	4.88512e-08	3.53751e-06	8.36384
ZUCXcuxfXXfHTU1S0E	HCP5	HLA complex P5 (non-protein coding)	0.746908	10.4321	8.50837	6.88164e-11	2.38941e-08	14.7329
Qcd3lNEKVH.sn1m4uI	LILRA6	leukocyte immunoglobulin-like receptor, subfamily A (with TM domain), member 6	0.743956	8.9737	7.20023	5.43898e-09	6.87954e-07	10.4945
TY47U6f7qCMe6I4n1I	TNFAIP6	tumor necrosis factor, alpha-induced protein 6	0.739235	8.55117	5.50828	1.71253e-06	5.18383e-05	4.91766
0SXhieViujBeEehqDU	CD14	CD14 molecule	0.735423	10.253	5.10492	6.62736e-06	0.000145604	3.61143
Nk5OooPTfS3FJVZ7to	CTSL1	cathepsin L1	0.732729	8.06526	7.92011	4.827e-10	1.12469e-07	12.8448
0R3_RHfu..nR7RPVJE	PHF11	PHD finger protein 11	0.732376	9.52113	8.90834	1.86652e-11	8.26307e-09	15.9958
33KnLHy.RFaieogAF4	H1F0	H1 histone family, member 0	0.727015	8.18713	6.96214	1.21997e-08	1.26181e-06	9.71037
WRTTVLJ5XPQeQS3UoU	CD36	CD36 molecule (thrombospondin receptor)	0.721882	8.65873	6.85162	1.77638e-08	1.63111e-06	9.34563
fcV3S0U75If1e3op0U	SP110	SP110 nuclear body protein	0.715766	9.89217	6.76653	2.37291e-08	2.02017e-06	9.0646
Tt5huq2hqZcdZqzRSc	HCG4	HLA complex group 4 (non-protein coding)	0.707038	11.3897	5.89041	4.69248e-07	1.96906e-05	6.17035
upH6Ifs4COnuXeXt1U	IL1RN	interleukin 1 receptor antagonist	0.701867	9.0729	6.73858	2.60986e-08	2.19849e-06	8.97222
HeIKB6eeAIBk15Hl6o	BLVRA	biliverdin reductase A	0.699752	8.3789	9.29638	5.35284e-12	3.38529e-09	17.203
HU6l.0SqESn3wBBWn0	GBP4	guanylate binding protein 4	0.696899	8.64535	5.0852	7.07734e-06	0.00015321	3.54812
o3aWaFalm7iZn_Rdc0	NA	NA	0.696704	9.72344	5.90541	4.45925e-07	1.8891e-05	6.21973
i78RqXiRSgUoh8Yh3g	FCER1G	Fc fragment of IgE, high affinity I, receptor for; gamma polypeptide	0.696025	10.9083	5.71205	8.59657e-07	3.11305e-05	5.58424
WqenuuGedD9eu59oXw	FFAR2	free fatty acid receptor 2	0.690438	10.2703	5.17957	5.16619e-06	0.000121009	3.85154
onYjOL3kArrWTX6V3o	SCARB2	scavenger receptor class B, member 2	0.688561	8.54969	8.75843	3.03772e-11	1.16939e-08	15.5246
0tbjDbteANdkRHp66I	IRF9	interferon regulatory factor 9	0.684378	10.6233	7.30001	3.88021e-09	5.71604e-07	10.8223
Qkl1OrSbvUIoBbBfkc	FCGR1B	Fc fragment of IgG, high affinity Ib, receptor (CD64)	0.678227	8.34884	5.68923	9.28758e-07	3.28272e-05	5.50942
ir7h1CJIuKCFVCTIdo	ADAR	adenosine deaminase, RNA-specific	0.67408	10.7549	6.83621	1.872e-08	1.67421e-06	9.29474
fSUs9G5SQSFx1H6cV4	FAM46A	family with sequence similarity 46, member A	0.673942	9.15814	6.10463	2.26394e-07	1.1136e-05	6.87655
0_DHz7_krTURH3lVHk	GIMAP4	GTPase, IMAP family member 4	0.673813	11.0417	6.07935	2.46746e-07	1.18733e-05	6.79312
07rojh4JWEaXibUgOs	ANXA2	annexin A2	0.672268	10.5875	6.28551	1.22237e-07	6.87166e-06	7.4741
uud.vTT6V09Qkfxnt4	ABCA1	ATP-binding cassette, sub-family A (ABC1), member 1	0.670761	8.55059	7.67368	1.10146e-09	2.13302e-07	12.0444
9WQr2P9P4klI6yJkjk	CASP1	caspase 1, apoptosis-related cysteine peptidase (interleukin 1, beta, convertase)	0.66695	9.14183	8.85883	2.19161e-11	9.46562e-09	15.8404
f7H6uyh3Lvfq7Pk6nk	ZFAND5	zinc finger, AN1-type domain 5	0.666732	10.0977	6.26262	1.32154e-07	7.29027e-06	7.39845
Qe0WCUoJVv7Cbu_658	H2AFY	H2A histone family, member Y	0.665767	11.4509	7.29807	3.90581e-09	5.71604e-07	10.8159
rfqvqsrIxQOAR.ShfU	PARP9	poly (ADP-ribose) polymerase family, member 9	0.665665	8.38309	6.8457	1.81249e-08	1.63753e-06	9.3261
THcpENrtDZ3SnUue_0	DDX60	DEAD (Asp-Glu-Ala-Asp) box polypeptide 60	0.664721	7.94963	9.86888	8.75706e-13	7.27543e-10	18.9492
Kh15Vr0FcUn7rB8e0Q	FBXO6	F-box protein 6	0.658491	8.10568	6.97595	1.16404e-08	1.21969e-06	9.75592
6uXPf6fDiHqFPrjiCk	CD36	CD36 molecule (thrombospondin receptor)	0.651622	8.79466	6.30381	1.14843e-07	6.53901e-06	7.53462
3l_kqRDhftgNRe0oZc	CST3	cystatin C	0.649884	12.1381	4.21172	0.000121472	0.0012341	0.82237
T1aLrJnt164KLP7RHo	TIMM10	translocase of inner mitochondrial membrane 10 homolog (yeast)	0.648942	7.99566	4.83203	1.63665e-05	0.000284693	2.7413
igVgS9VeuSoulMrp1w	OAS2	2'-5'-oligoadenylate synthetase 2, 69/71kDa	0.648125	7.83258	7.29208	3.98568e-09	5.73809e-07	10.7963
fIB26Kp7Wd666G8L2g	TYMP	thymidine phosphorylase	0.647104	8.72207	5.95571	3.7583e-07	1.63518e-05	6.38538
lklI6yJkjlRR4CLh.g	CASP1	caspase 1, apoptosis-related cysteine peptidase (interleukin 1, beta, convertase)	0.646591	9.13569	7.89899	5.17964e-10	1.18511e-07	12.7764
NoYII8YdcmX3lVSFMk	DRAP1	DR1-associated protein 1 (negative cofactor 2 alpha)	0.644323	9.42348	5.76194	7.25859e-07	2.76738e-05	5.74798
HgCiovEdKeQkuEuVKk	HLA-A	major histocompatibility complex, class I, A	0.643911	11.4786	3.87502	0.000346715	0.00270349	-0.173697
xl7UnV3VQgEE4OJB9I	GBP2	guanylate binding protein 2, interferon-inducible	0.638407	10.6301	7.0105	1.03514e-08	1.13866e-06	9.86984
QejSIV5d7_FWR4eDAk	GPBAR1	G protein-coupled bile acid receptor 1	0.638404	8.69208	5.30411	3.40446e-06	8.93129e-05	4.25392
3V_qkyHl9foV9QLu6w	C1orf162	chromosome 1 open reading frame 162	0.637939	11.2592	6.33592	1.02936e-07	6.06739e-06	7.64078
6lPl9z1xF.1yqnrVp0	NAGK	N-acetylglucosamine kinase	0.637852	9.83872	6.3373	1.02452e-07	6.06739e-06	7.64535
9iDnutZBFSNhB16q3g	LGALS9	lectin, galactoside-binding, soluble, 9	0.63577	8.74021	5.5867	1.31401e-06	4.26945e-05	5.17376
3pRFCSgkQHVUJ4dNcE	CSF1R	colony stimulating factor 1 receptor	0.624892	9.67719	4.57873	3.74644e-05	0.000522377	1.94649
T4.6rJDUogrnoirg5Y	PSME2	proteasome (prosome, macropain) activator subunit 2 (PA28 beta)	0.621799	10.0602	6.24828	1.38776e-07	7.54779e-06	7.35104
BqUICQfiX6nDeniy0s	ELF1	E74-like factor 1 (ets domain transcription factor)	0.619097	9.73985	9.85876	9.03882e-13	7.27543e-10	18.9187
xVb14TRJJdQRCnUIXI	CD74	CD74 molecule, major histocompatibility complex, class II invariant chain	0.618981	11.2129	4.06941	0.000189981	0.001727	0.396801
QS50.4jFec2OtnEBSg	MS4A7	membrane-spanning 4-domains, subfamily A, member 7	0.607613	8.61506	5.66525	1.00733e-06	3.48167e-05	5.43085
Wk6rmu6qk7nl77zq.8	BST2	bone marrow stromal cell antigen 2	0.605189	9.04731	6.25459	1.35819e-07	7.4692e-06	7.37192
QdQghd3XurkPge9Nb0	NT5C3	5'-nucleotidase, cytosolic III	0.598075	8.86226	5.29644	3.49325e-06	9.07016e-05	4.22907
BXu.k13vXPeV_d7tN0	GNS	glucosamine (N-acetyl)-6-sulfatase	0.589393	10.4511	5.18082	5.14459e-06	0.000121009	3.85558
ceSnuwk78Xvp_f7u3s	DPYSL2	dihydropyrimidinase-like 2	0.588786	9.43131	5.63794	1.10493e-06	3.71784e-05	5.34139
6KD030txSVWe7aMRHY	CTSL1	cathepsin L1	0.587796	7.93475	7.25204	4.56397e-09	6.0766e-07	10.6648
uL6367TOjSKRC5Ip7o	GLRX	glutaredoxin (thioltransferase)	0.579981	9.37168	4.91998	1.22446e-05	0.000230914	3.02031
H66G8L2iqWW31UFKJI	TYMP	thymidine phosphorylase	0.575826	8.38609	5.91612	4.29994e-07	1.83478e-05	6.25496
3TXj7nnrbf3V0iS4SQ	VAMP5	vesicle-associated membrane protein 5 (myobrevin)	0.5711	8.74163	6.09274	2.35747e-07	1.15003e-05	6.83731
QKXwn_hUKgB5OiGT9o	LMO2	LIM domain only 2 (rhombotin-like 1)	0.569229	9.03142	6.58072	4.46847e-08	3.31078e-06	8.45035
9cCgqXeeHXFIk1tSdI	GPBAR1	G protein-coupled bile acid receptor 1	0.566192	8.43471	5.11978	6.3072e-06	0.000140488	3.65915
6KSl0.TRkk7kpegiQI	WARS	tryptophanyl-tRNA synthetase	0.563949	9.51465	3.36034	0.00160484	0.00881193	-1.61397
Kf7KZTSUf8glNJS7vo	ARHGEF3	Rho guanine nucleotide exchange factor (GEF) 3	0.563713	9.32839	6.43026	7.46273e-08	4.89797e-06	7.95273
WRQ4OLXyV7tL8V2OV8	TRIM5	tripartite motif containing 5	0.562853	8.15307	6.68159	3.16891e-08	2.50061e-06	8.78385
xV3Ts6bUkl_.eHfe5c	CLEC12A	C-type lectin domain family 12, member A	0.562719	8.61316	2.94609	0.0051027	0.0214355	-2.68412
KeO7d0SfgCXiEnt_4o	HLA-B	major histocompatibility complex, class I, B	0.560595	13.0331	6.08653	2.40784e-07	1.16816e-05	6.81682
op3vv4MBuBuBUpoKhU	PARP10	poly (ADP-ribose) polymerase family, member 10	0.559312	8.78968	5.57253	1.37851e-06	4.43638e-05	5.12743
fhrMp_N7fnz75VeZck	HAVCR2	hepatitis A virus cellular receptor 2	0.558747	8.84672	7.21977	5.09087e-09	6.58022e-07	10.5587
BuOl._Or.vu37gQtvE	CHMP5	chromatin modifying protein 5	0.558727	8.26968	6.36224	9.41026e-08	5.71514e-06	7.7278
Wpz7X7s14SZTu7SVO0	YWHAH	tyrosine 3-monooxygenase/tryptophan 5-monooxygenase activation protein, eta polypeptide	0.557633	9.97731	7.0778	8.23715e-09	9.59628e-07	10.0916
cenynVkOoAQWipSJ8s	DHX58	DEXH (Asp-Glu-X-His) box polypeptide 58	0.555281	7.8059	7.2345	4.84317e-09	6.30609e-07	10.6071
ER1CPOl2pC5764iHeg	HEXB	hexosaminidase B (beta polypeptide)	0.552132	9.60573	7.21242	5.21905e-09	6.64885e-07	10.5346
NISQQXuXkfQV2fQZUY	LGALS1	lectin, galactoside-binding, soluble, 1	0.549218	10.161	4.39297	6.82114e-05	0.000803908	1.37305
NQHgKQwNc7gToXd1ro	DHRS9	dehydrogenase/reductase (SDR family) member 9	0.545863	8.30467	5.49843	1.7704e-06	5.26289e-05	4.88553
ipV3uAE5UmkKUEJ6qM	NA	NA	0.545685	7.92173	6.45109	6.951e-08	4.64484e-06	8.02165
6nk4QJbUDVx1VFwIeo	RTP4	receptor (chemosensory) transporter protein 4	0.540834	7.77179	8.19522	1.93332e-10	5.52609e-08	13.732
Trqpb5K7Hqe0qN.3MU	SLC27A3	solute carrier family 27 (fatty acid transporter), member 3	0.538488	8.81473	5.96264	3.67076e-07	1.60812e-05	6.40822
3LJ1F4IqOgXerSgEno	C11orf75	chromosome 11 open reading frame 75	0.534146	8.47568	6.72161	2.76506e-08	2.28802e-06	8.91616
0igIDypdd43dnN5q14	CNDP2	CNDP dipeptidase 2 (metallopeptidase M20 family)	0.533811	9.7479	4.79316	1.85981e-05	0.000313057	2.61846
lv1.83dCUUnlJRRiUk	CYBB	cytochrome b-245, beta polypeptide	0.531017	8.76931	7.11636	7.22729e-09	8.70618e-07	10.2186
3k.6CetJySv96jtqIU	MYLIP	myosin regulatory light chain interacting protein	0.530641	9.48521	6.73748	2.61961e-08	2.19849e-06	8.9686
fr.cFeEaHuTH9XTU54	CEACAM1	carcinoembryonic antigen-related cell adhesion molecule 1 (biliary glycoprotein)	0.530526	8.32824	6.04957	2.73074e-07	1.28949e-05	6.69486
ZTFRXx9el33qceUe7k	RRAS	related RAS viral (r-ras) oncogene homolog	0.530253	8.29619	7.70517	9.90992e-10	1.97174e-07	12.147
NFtdNMC3eb3pThValQ	HLA-DPA1	major histocompatibility complex, class II, DP alpha 1	0.525614	10.9288	4.17205	0.000137677	0.00135727	0.703103
NJ1q6evdLr7dO3f.e0	NPC2	Niemann-Pick disease, type C2	0.523035	11.4195	6.00877	3.13757e-07	1.42097e-05	6.56028
01Tv.FeVeX48h1yRek	CD86	CD86 molecule	0.518828	8.56396	7.72794	9.18124e-10	1.89048e-07	12.2211
WeyXq7G.R0L3XHih34	NCOA7	nuclear receptor coactivator 7	0.517185	8.21298	5.95764	3.73376e-07	1.62851e-05	6.39173
6ldXQ9V7BPXgnvVHVI	PLEK	pleckstrin	0.51399	10.6284	6.59934	4.1937e-08	3.14669e-06	8.51193
BXWHeW9TUuAd9PeqwI	NA	NA	0.513133	8.42112	4.49283	4.94716e-05	0.000637586	1.68025
ZPwXFJX3VUMHutzEi0	MYL12A	myosin, light chain 12A, regulatory, non-sarcomeric	0.51177	11.5093	4.3939	6.80092e-05	0.000802337	1.37589
iqt.idQAMBH1.ioiRE	NA	NA	0.508476	8.92901	3.80888	0.000424346	0.00313619	-0.364747
30dxWiL9Wfr4ET6XSg	ANXA2	annexin A2	0.508304	8.33148	7.24197	4.7222e-09	6.19412e-07	10.6317
0iS9nXV4wi_1QKtnwo	S100A10	S100 calcium binding protein A10	0.507679	11.5788	5.15476	5.61251e-06	0.00012824	3.77164
6R7cpxBKPcror7k77U	LDHA	lactate dehydrogenase A	0.505599	10.297	7.50272	1.95743e-09	3.36526e-07	11.4865
ZXjugJKr963HpyJwoI	SLC7A7	solute carrier family 7 (amino acid transporter light chain, y+L system), member 7	0.505229	9.76198	4.57774	3.75842e-05	0.000523635	1.94343
BUX_PpYB0uPpEIsr5I	OAS2	2'-5'-oligoadenylate synthetase 2, 69/71kDa	0.503372	7.75355	5.81783	6.00447e-07	2.36283e-05	5.9316
BKn_Vf97C3fqNe7IJ4	RAB10	RAB10, member RAS oncogene family	0.502898	9.53421	6.38374	8.74528e-08	5.45578e-06	7.79889
ijOuV7s1SI5yAHvf50	WDFY1	WD repeat and FYVE domain containing 1	0.502678	8.38589	6.45941	6.75676e-08	4.54938e-06	8.04914
QjpTeSFCCQldBIHg3E	DDX60L	DEAD (Asp-Glu-Ala-Asp) box polypeptide 60-like	0.500977	8.0132	7.15945	6.24502e-09	7.67964e-07	10.3604
HUrVUiUN5Vd3Od_B9w	OASL	2'-5'-oligoadenylate synthetase-like	0.5002	7.81888	6.39786	8.33425e-08	5.30874e-06	7.84559
fueRH8SSfX9.U6R5cs	AP1S2	adaptor-related protein complex 1, sigma 2 subunit	0.499228	9.51387	3.83325	0.000393967	0.00296867	-0.294544
KTL3lz7X1eKdT55_uk	SUMO3	SMT3 suppressor of mif two 3 homolog 3 (S. cerevisiae)	0.499084	9.12637	9.22499	6.72708e-12	3.60979e-09	16.9823
EfGAvg_rimpA0XitJI	WSB1	WD repeat and SOCS box containing 1	0.485284	9.0105	5.26605	3.86802e-06	9.79367e-05	4.13072
Ko6INenlO6_OUlXUiA	CMPK2	cytidine monophosphate (UMP-CMP) kinase 2, mitochondrial	0.482317	7.7224	7.09221	7.84433e-09	9.2605e-07	10.1391
3nq_5PCpS.H7eXf4UU	ADAP2	ArfGAP with dual PH domains 2	0.480634	8.23267	6.97952	1.15001e-08	1.2187e-06	9.76769
9STIfB1fCVITe_oXhU	NA	NA	0.479455	10.631	6.69414	3.03622e-08	2.44388e-06	8.82536
WunOQSd0XGYt8f4vLk	ITGB1	integrin, beta 1 (fibronectin receptor, beta polypeptide, antigen CD29 includes MDF2, MSK12)	0.477316	9.40621	4.26902	0.000101306	0.001071	0.99543
3EoJAcJVZ7DgEX3eiU	GZMB	granzyme B (granzyme 2, cytotoxic T-lymphocyte-associated serine esterase 1)	0.476916	9.22143	2.6821	0.0102255	0.0365508	-3.31687
cd3jnj_R3noPeXJ7nQ	MS4A6A	membrane-spanning 4-domains, subfamily A, member 6A	0.470015	9.46825	4.4466	5.742e-05	0.000710051	1.5377
cXS4CS030k.1JXMlFU	HLA-DRA	major histocompatibility complex, class II, DR alpha	0.468227	12.2611	4.37102	7.31815e-05	0.000843135	1.30585
xIiQHFEFDr4lXtC5S0	FGD2	FYVE, RhoGEF and PH domain containing 2	0.468203	9.19164	4.20334	0.000124732	0.0012602	0.797141
954L.6Un8v4odfjCfk	FYB	FYN binding protein	0.467621	10.418	5.60152	1.24979e-06	4.07574e-05	5.22222
N6fAOx3X.O63f6pY_o	NA	NA	0.466091	11.8244	6.59341	4.27935e-08	3.19741e-06	8.49231
upM5M15x5J5Fzj681A	DDX5	DEAD (Asp-Glu-Ala-Asp) box polypeptide 5	0.466001	10.874	5.21794	4.54413e-06	0.000110532	3.97529
l6lSv4qIK_SJH1Rd3g	FGR	Gardner-Rasheed feline sarcoma viral (v-fgr) oncogene homolog	0.461657	11.3808	4.62892	3.18246e-05	0.000458253	2.10287
KsX5EfPHl0vvl6IbCg	SPPL2A	signal peptide peptidase-like 2A	0.460866	8.42457	10.6652	7.55392e-14	9.55463e-11	21.3048
cNeHntOm5XeiClejuM	S100A4	S100 calcium binding protein A4	0.459819	12.7275	4.92533	1.20299e-05	0.000228323	3.03733
KVb81O7U_GlNzvn32k	RNF213	ring finger protein 213	0.459142	7.82757	7.51643	1.86903e-09	3.27691e-07	11.5313
Qr.Yl55Z3pg4V_H3jc	FBXL5	F-box and leucine-rich repeat protein 5	0.459118	9.6944	6.90699	1.47146e-08	1.43959e-06	9.52843
rXGgNcHFHpKAeTN968	USP18	ubiquitin specific peptidase 18	0.456484	7.68311	5.64541	1.07731e-06	3.65461e-05	5.36587
QcTp5rXYs3hZYjXono	HIST2H2AA4	histone cluster 2, H2aa4	0.454257	9.44584	2.94035	0.00518231	0.0216984	-2.69831
luo2ITsJJNOiv4I5ZM	B2M	beta-2-microglobulin	0.453847	13.1512	3.55683	0.000904258	0.00565217	-1.07725
053WgoPev2bjXl5tbs	BRSK1	BR serine/threonine kinase 1	0.453744	8.23952	5.37136	2.71611e-06	7.41093e-05	4.47202
ZSVvWSocin9p._oSQc	ISG20	interferon stimulated exonuclease gene 20kDa	0.449193	10.6158	3.60557	0.000782551	0.00504636	-0.941498
f5OhpkpWUh8KhetFGc	TYMP	thymidine phosphorylase	0.447505	8.24515	5.24803	4.10864e-06	0.000102617	4.07248
oSxE1zlMLrVEsQrpdU	PLBD1	phospholipase B domain containing 1	0.443292	10.3799	3.83942	0.000386619	0.00293051	-0.276742
of0kyHwdXwlSE3viF4	HMGN2	high mobility group nucleosomal binding domain 2	0.439781	10.5276	7.28759	4.04667e-09	5.7789e-07	10.7816
uhfkPyDQkriEqILOXk	EVI2A	ecotropic viral integration site 2A	0.439014	8.463	3.12209	0.00315059	0.0148261	-2.24029
WpIDiS9nXV4wi_1Aq0	S100A10	S100 calcium binding protein A10	0.438246	11.0362	4.11669	0.000163847	0.00154576	0.537499
oevLuAy95Rd4ZFHlDk	LDHA	lactate dehydrogenase A	0.437866	9.81271	5.02686	8.59274e-06	0.000177515	3.36122
fSUyR.vR7Xu0iR4nUU	TXNIP	thioredoxin interacting protein	0.437551	13.2025	4.56278	3.94535e-05	0.000540745	1.89692
0kuM6SCEUiSOSIlP_4	HNRNPA2B1	heterogeneous nuclear ribonucleoprotein A2/B1	0.436879	10.527	3.60567	0.000782305	0.00504636	-0.941202
Wivj4OlfbjC0nuHtKk	HSPA6	heat shock 70kDa protein 6 (HSP70B')	0.436278	10.1399	4.02952	0.000215136	0.00190386	0.278689
BLXpdZI59P_Ffp5LoI	WARS	tryptophanyl-tRNA synthetase	0.432911	8.84925	2.77884	0.00795844	0.0300348	-3.08979
rk9NuKrf7Xex7d3X5U	ATP5B	ATP synthase, H+ transporting, mitochondrial F1 complex, beta polypeptide	0.431601	11.6285	6.24845	1.38691e-07	7.54779e-06	7.35163
6nhZEkt6fj.SW00_r0	RAB8A	RAB8A, member RAS oncogene family	0.43139	9.70845	6.65039	3.52415e-08	2.73709e-06	8.68073
fzqLiUkhJUkjXERP9E	LILRB2	leukocyte immunoglobulin-like receptor, subfamily B (with TM and ITIM domains), member 2	0.430758	9.08794	4.97082	1.03485e-05	0.00020498	3.18221
ilVw_Hg6BV34UC4VSA	NA	NA	0.430363	8.04088	8.18411	2.00577e-10	5.63781e-08	13.6963
rqEqc_MK1X675ffk3U	C1orf85	chromosome 1 open reading frame 85	0.430012	8.36562	5.49636	1.78284e-06	5.2882e-05	4.87877
uVnHtvPjRN7uCUCVbo	LIPA	lipase A, lysosomal acid, cholesterol esterase	0.429746	8.948	3.65641	0.000672388	0.00447106	-0.798807
EnOL_5f54oRyBen5dU	MS4A6A	membrane-spanning 4-domains, subfamily A, member 6A	0.427049	9.27125	4.26666	0.000102067	0.0010752	0.98829
BUEfb8dYNKAVKVBpK4	MNDA	myeloid cell nuclear differentiation antigen	0.424397	10.9955	3.92138	0.000300683	0.00243908	-0.0388286
l4OKUNCFIIFHQkjVJU	MLKL	mixed lineage kinase domain-like	0.423882	9.41999	6.32099	1.08311e-07	6.27577e-06	7.59141
02tiuhr_lsCu6c8E64	EIF4A1	eukaryotic translation initiation factor 4A1	0.422782	11.0885	5.33277	3.09217e-06	8.19328e-05	4.34681
xYf1Y2UpKL93a4cc2c	HIST2H2AA3	histone cluster 2, H2aa3	0.422109	9.36969	2.94463	0.00512278	0.0214962	-2.68772
6SlFhCB0cepOirlBJM	C1QB	complement component 1, q subcomponent, B chain	0.421897	7.63094	4.93582	1.16199e-05	0.000222571	3.0707
6w1bzod7dSiKrc1FXk	BTN3A1	butyrophilin, subfamily 3, member A1	0.421483	8.51919	5.92135	4.2241e-07	1.81554e-05	6.2722
Ewd5xOneHnuqj4Agzk	TDRD7	tudor domain containing 7	0.420406	7.94782	8.69253	3.76581e-11	1.38927e-08	15.3166
xXVB3jQjfDg1eUXUXk	EVI2B	ecotropic viral integration site 2B	0.419049	11.4316	6.1755	1.77835e-07	9.12782e-06	7.11058
HHQq60nQ5xEiRof_j0	IL10RB	interleukin 10 receptor, beta	0.418926	10.2512	6.40199	8.21771e-08	5.2534e-06	7.85924
EUn0lKhANV1QFHdRJ8	CREG1	cellular repressor of E1A-stimulated genes 1	0.416704	8.44138	5.74893	7.58601e-07	2.85815e-05	5.70527
9e.eSqOM_uL5QIJDEk	WSB1	WD repeat and SOCS box containing 1	0.415234	8.45364	4.14595	0.000149465	0.00144079	0.624902
0Op.O5yP8M1_JepC5E	EIF4G2	eukaryotic translation initiation factor 4 gamma, 2	0.413795	10.9117	4.92703	1.19626e-05	0.000227533	3.04273
3gr.1Sht07_lfyD6rI	RGS18	regulator of G-protein signaling 18	0.413489	9.11989	2.82691	0.00701391	0.0272433	-2.97485
Wnte91N1P31TnsFUp0	PATL1	protein associated with topoisomerase II homolog 1 (yeast)	0.412055	8.62716	7.83854	6.33926e-10	1.38587e-07	12.5804
Z0g_kkQIAZXdeH7Puk	KPNB1	karyopherin (importin) beta 1	0.412006	10.3411	4.35944	7.59421e-05	0.000865735	1.27048
fTneb76.RSfeV0TkSo	SLC20A1	solute carrier family 20 (phosphate transporter), member 1	0.411916	8.94929	7.30976	3.7544e-09	5.6293e-07	10.8543
9SBEyJ7g4I1JaX6iXo	CES1	carboxylesterase 1	0.411376	7.95069	4.73753	2.23221e-05	0.000353515	2.44317
9XqXh7q3rqTTz6hTfQ	HLA-DRA	major histocompatibility complex, class II, DR alpha	0.410665	11.8448	3.48229	0.00112607	0.00671847	-1.2829
BuPuFBPSlG4ke3zRNk	AP1S2	adaptor-related protein complex 1, sigma 2 subunit	0.409609	9.49491	3.15449	0.00287857	0.0138328	-2.15679
K57zV5etdEdFQQ1QpU	WAS	Wiskott-Aldrich syndrome (eczema-thrombocytopenia)	0.409548	11.6165	3.95743	0.000269034	0.00225069	0.0665717
Zle_ESt.XCnkK.Keuk	CCND3	cyclin D3	0.408574	11.2709	4.23895	0.000111444	0.00115271	0.90449
xU646Ov6AqDvrl.7lE	DUSP3	dual specificity phosphatase 3	0.407649	8.82783	5.33586	3.06031e-06	8.14918e-05	4.3568
lhfxfUlFUS5_M.SLS0	RTN4	reticulon 4	0.407029	9.6696	5.365	2.7748e-06	7.53621e-05	4.45138
fIouv7hCaDUDpPYunU	KYNU	kynureninase	0.406694	8.13058	8.06873	2.94196e-10	7.89337e-08	13.325
uemnSNkU_XGAECV450	LGALS3BP	lectin, galactoside-binding, soluble, 3 binding protein	0.405579	7.70593	6.04289	2.79361e-07	1.30526e-05	6.6728
cNV8JUhN76heFVrT68	TRMT5	TRM5 tRNA methyltransferase 5 homolog (S. cerevisiae)	0.403774	10.1524	5.1964	4.88357e-06	0.000116234	3.9058
9V4f795ApF5O7e727I	HLA-A	major histocompatibility complex, class I, A	0.400494	13.6474	5.15901	5.53347e-06	0.000126762	3.78532
3H5erRMnCgiuh_VJ.k	TAP2	transporter 2, ATP-binding cassette, sub-family B (MDR/TAP)	0.4004	8.19932	7.58515	1.48306e-09	2.73564e-07	11.7558
x6gbn6ZhXmpN4et9Sc	NA	NA	0.399433	8.86285	6.56181	4.766e-08	3.48745e-06	8.3878
EXIf4.daSVI70vd_lU	PPP1R11	protein phosphatase 1, regulatory (inhibitor) subunit 11	0.398547	9.77699	4.79614	1.8417e-05	0.000311191	2.62787
HqHNSN_7pOOs_J_qNM	MS4A6A	membrane-spanning 4-domains, subfamily A, member 6A	0.398216	9.43912	3.75395	0.000501335	0.00357249	-0.522169
BgprkrXTrndXT3ee3c	EMP3	epithelial membrane protein 3	0.397995	11.1508	5.15408	5.62529e-06	0.000128367	3.76945
03kIj3koHq7kRrvslI	EFR3A	EFR3 homolog A (S. cerevisiae)	0.397285	8.58718	5.02109	8.75899e-06	0.000179935	3.34277
fKALfp6FX9eero5LrU	FGR	Gardner-Rasheed feline sarcoma viral (v-fgr) oncogene homolog	0.397212	10.7575	3.89759	0.000323512	0.00257413	-0.108132
HSCEir2DVJHltx0eyw	OSCAR	osteoclast associated, immunoglobulin-like receptor	0.392958	8.78788	4.01816	0.000222873	0.00195185	0.245146
xmKeUSKOgO18JkleL4	FCGR1A	Fc fragment of IgG, high affinity Ia, receptor (CD64)	0.392666	7.88615	5.24582	4.13927e-06	0.000103092	4.06531
fr44n_Hmv_gXxd118k	PRR13	proline rich 13	0.391607	12.2099	5.6413	1.09241e-06	3.69169e-05	5.3524
TUv5K5EBzirfs1GwRI	RIN2	Ras and Rab interactor 2	0.391382	7.74915	6.71536	2.82458e-08	2.31563e-06	8.89549
Z99V3cQV3ddJn339_s	S100A4	S100 calcium binding protein A4	0.390392	12.9105	4.84261	1.58063e-05	0.000277677	2.77478
cf3p10BLK_ksKSrVP0	SLC2A3	solute carrier family 2 (facilitated glucose transporter), member 3	0.3876	11.1415	4.14458	0.000150111	0.00144623	0.620796
Kn2SO1_OdM_9XD_Uuo	NA	NA	0.387547	8.5285	5.88465	4.78535e-07	1.99386e-05	6.15137
luwnu1y9_BL85Lnn_U	PCMT1	protein-L-isoaspartate (D-aspartate) O-methyltransferase	0.387315	8.87259	5.50268	1.7452e-06	5.23797e-05	4.89939
ilNVTfVyESSE3iAn0k	NA	NA	0.386976	9.02144	6.10217	2.28297e-07	1.11986e-05	6.86844
xntytbWu7SP9dI8juU	EPB41L3	erythrocyte membrane protein band 4.1-like 3	0.38543	7.82761	7.50631	1.93386e-09	3.35733e-07	11.4982
rvRN_9VP3R_7RSe.uU	TRAM1	translocation associated membrane protein 1	0.384354	10.1446	4.68224	2.67462e-05	0.00040377	2.26962
lBLUXe7cU4VX10R4Xs	HLA-E	major histocompatibility complex, class I, E	0.38065	12.4974	4.5536	4.06453e-05	0.00055153	1.86841
0Svv6Xd61N_pPK91JI	ADAR	adenosine deaminase, RNA-specific	0.380195	9.56348	4.10719	0.0001688	0.00157903	0.509174
c6BohJPqeHupOKKjCk	RAB24	RAB24, member RAS oncogene family	0.379213	9.75802	4.93087	1.18116e-05	0.000225599	3.05495
QhTXPwen0l1UX30lF0	SELL	selectin L	0.379027	11.2996	4.21173	0.00012147	0.0012341	0.822387
rpFefX_fk1RIc.V01w	YWHAZ	tyrosine 3-monooxygenase/tryptophan 5-monooxygenase activation protein, zeta polypeptide	0.378348	11.35	6.08305	2.43656e-07	1.17887e-05	6.80533
0vqDufpnhXmpN4et9Q	RCC2	regulator of chromosome condensation 2	0.377308	8.83675	7.0233	9.91118e-09	1.12505e-06	9.91203
9Vj517sCOX7bkgEDp4	SRSF2	serine/arginine-rich splicing factor 2	0.376923	9.52903	5.87132	5.00709e-07	2.05797e-05	6.1075
uTkj_5E7iKu1L_3Lj4	YWHAQ	tyrosine 3-monooxygenase/tryptophan 5-monooxygenase activation protein, theta polypeptide	0.375845	10.0082	5.04821	8.00435e-06	0.000167741	3.42954
TGtKt9_YVpWdSNVEnc	UNC93B1	unc-93 homolog B1 (C. elegans)	0.374845	8.67949	4.33527	8.20401e-05	0.000917151	1.19672
9ogng5BAT4nJRLkl6U	PSMA5	proteasome (prosome, macropain) subunit, alpha type, 5	0.374589	9.37956	6.96978	1.1887e-08	1.2382e-06	9.73557
6TTnqoj3SEdjo1FRPQ	APOBEC3G	apolipoprotein B mRNA editing enzyme, catalytic polypeptide-like 3G	0.374133	8.52936	5.05879	7.72749e-06	0.00016292	3.46345
KCBFeWFAiFPiSiCaLg	TMSB10	thymosin beta 10	0.373401	12.5167	4.4115	6.42753e-05	0.000769565	1.42986
c_5.L5y.seIvhd1e5I	MTSS1	metastasis suppressor 1	0.372863	8.38607	4.6878	2.62653e-05	0.000399576	2.28703
EHVCiHwg6SOi6UO_JE	NT5C3	5'-nucleotidase, cytosolic III	0.372379	8.27384	4.76756	2.02291e-05	0.000330236	2.53772
HqjN50lDoA3q9BSVeU	RAC2	ras-related C3 botulinum toxin substrate 2 (rho family, small GTP binding protein Rac2)	0.371202	12.5981	4.83738	1.60807e-05	0.000281102	2.75823
NpOOkK_yXAnTR.7K64	LYSMD2	LysM, putative peptidoglycan-binding, domain containing 2	0.371109	9.53828	4.05936	0.000196034	0.0017684	0.367003
6iT.9O5SJex6KVU_5E	CLEC4A	C-type lectin domain family 4, member A	0.368961	8.69564	3.2834	0.00200069	0.0104724	-1.81929
oU3qAMVTT05x5QXqiU	CX3CR1	chemokine (C-X3-C motif) receptor 1	0.368893	8.17754	4.71871	2.37407e-05	0.000369745	2.38402
QXe3Us0UQD731_i7fo	HMGN4	high mobility group nucleosomal binding domain 4	0.368452	9.13902	5.07811	7.24635e-06	0.00015598	3.52538
6J07rlV.X7eLp4p4xU	FERMT3	fermitin family member 3	0.367221	9.4249	5.14252	5.84642e-06	0.000132729	3.73228
NmhkRKIAl8SOdOoKu4	NA	NA	0.365906	9.84179	4.12026	0.000162022	0.00153345	0.548152
9K1yu4XjFFFf7pJFqc	TOR1B	torsin family 1, member B (torsin B)	0.365605	8.00353	6.36181	9.42411e-08	5.71514e-06	7.72637
r7J67r56D73z6X5PHk	NA	NA	0.364182	8.68268	4.28693	9.56984e-05	0.00103142	1.04975
KSbk7vQl8j6Y7bP9dE	TLR7	toll-like receptor 7	0.363309	7.82181	6.97794	1.15621e-08	1.2187e-06	9.76247
BVN3lH_Oc.q846pCOk	GCH1	GTP cyclohydrolase 1	0.362806	7.88185	6.17989	1.75195e-07	9.04475e-06	7.12508
QeeYeOUoQX91SOwEiI	MT1F	metallothionein 1F	0.361688	8.19365	7.29245	3.98073e-09	5.73809e-07	10.7975
9T7by.FI1uOUfF7u.o	PSMA6	proteasome (prosome, macropain) subunit, alpha type, 6	0.361681	8.85475	3.01561	0.00422499	0.0185672	-2.51081
9pUFj9TDskvFu9F0Rw	TMED5	transmembrane emp24 protein transport domain containing 5	0.360813	8.49641	4.60905	3.39495e-05	0.000481327	2.04091
lPneje9fpLodICUE7o	LCP1	lymphocyte cytosolic protein 1 (L-plastin)	0.359853	12.6625	3.94978	0.000275468	0.00229336	0.04417
xjlJ93dSrny_n_VFXQ	JUP	junction plakoglobin	0.359348	7.71294	5.25553	4.00676e-06	0.000100589	4.09671
352KZNKVv.xS.M0a30	RHBDF2	rhomboid 5 homolog 2 (Drosophila)	0.357519	9.02544	5.16435	5.43558e-06	0.000125493	3.80253
r15KzrSBUuF16I9a3Q	LILRA5	leukocyte immunoglobulin-like receptor, subfamily A (with TM domain), member 5	0.357063	8.64143	3.57135	0.000866224	0.00545282	-1.03692
i7XuHlUSIwqlKKj4Ck	ABI3	ABI family, member 3	0.356974	8.22989	5.28926	3.57844e-06	9.25067e-05	4.20581
ZK3XeorfpYdKhcJRvA	PSMB8	proteasome (prosome, macropain) subunit, beta type, 8 (large multifunctional peptidase 7)	0.356702	8.99695	4.66875	2.795e-05	0.000416563	2.22738
cQn9tLpBR3ykkkHr.o	AKIRIN2	akirin 2	0.356547	9.07525	5.35691	2.85134e-06	7.6735e-05	4.4251
rjoMglfvnsjubkt6SU	NA	NA	0.356278	10.9866	4.37229	7.28834e-05	0.000840653	1.30975
Z0We_Xll_ZL4du3igE	HK3	hexokinase 3 (white cell)	0.351007	8.65717	4.99584	9.52455e-06	0.000192976	3.26208
r_dQ6fDuAJ15Iwuhe0	RAB8B	RAB8B, member RAS oncogene family	0.350943	9.32853	3.56971	0.000870421	0.00547546	-1.04146
f0gM68T6BE4sV0.d0w	OAS1	2'-5'-oligoadenylate synthetase 1, 40/46kDa	0.350295	7.60097	4.94116	1.14163e-05	0.000219978	3.08771
un2SO1_OdM_9XP_Uuo	NA	NA	0.349103	8.60073	5.02119	8.75605e-06	0.000179935	3.34309
iMeiqS6uUsu15619eA	LACTB	lactamase, beta	0.348665	8.4327	5.64651	1.07334e-06	3.64811e-05	5.36944
WQ.ew7Vff3Kd757uDU	TMX1	thioredoxin-related transmembrane protein 1	0.348651	8.25082	4.23577	0.000112572	0.00116099	0.894892
Zos7RfXqpfp.jcQ4JU	S100A6	S100 calcium binding protein A6	0.34706	11.1661	3.50801	0.00104421	0.00634009	-1.2122
BuoBX.m618p8Q7keDY	PRNP	prion protein	0.346837	8.92022	4.54685	4.15431e-05	0.000561561	1.84749
WF5UVHXzPnuI_Vc37k	PEA15	phosphoprotein enriched in astrocytes 15	0.346295	8.58682	5.12678	6.16161e-06	0.000138114	3.68166
HjkkIKJTeQ1KCA9flI	IFIT1	interferon-induced protein with tetratricopeptide repeats 1	0.346083	7.65195	6.30646	1.1381e-07	6.52218e-06	7.54337
WoTwvS6U7yeraghNTo	ACOT9	acyl-CoA thioesterase 9	0.344517	8.00785	7.49403	2.01555e-09	3.39918e-07	11.4581
3Tvcfn6V5ROrUu9N4k	NA	NA	0.343652	10.3518	4.75524	2.10634e-05	0.000339082	2.4989
o7pi0qRfkag5EPinEk	CNBP	CCHC-type zinc finger, nucleic acid binding protein	0.342974	9.55009	4.93971	1.14711e-05	0.000220794	3.08309
HpTDXI5GfcPTsXkTuE	MATR3	matrin 3	0.342252	9.38053	2.80079	0.0075135	0.028724	-3.03749
9ioTS59d9RUPVUZr1M	TNK2	tyrosine kinase, non-receptor, 2	0.342229	9.1954	4.40906	6.47821e-05	0.000774063	1.42235
WXuPXrpSzXo9dwjfl0	NSF	N-ethylmaleimide-sensitive factor	0.342086	8.71725	7.35408	3.23212e-09	5.11021e-07	10.9997
0Lt45pR09p1Ug9ch6s	DAZAP2	DAZ associated protein 2	0.341514	12.0796	5.56739	1.40265e-06	4.47533e-05	5.11064
WiJV9C7jXjnlIlPujk	PPA1	pyrophosphatase (inorganic) 1	0.341102	8.75504	4.3628	7.51298e-05	0.000859986	1.28075
oV9YmmXCX_W4k5EeIM	KLF6	Kruppel-like factor 6	0.34058	10.9454	4.20988	0.000122184	0.00124062	0.816804
il0V5OcojoXt3MSSyM	GALM	galactose mutarotase (aldose 1-epimerase)	0.340178	7.82141	5.27584	3.74308e-06	9.60615e-05	4.1624
HFqE1p4606I1kOfOe4	PSME1	proteasome (prosome, macropain) activator subunit 1 (PA28 alpha)	0.339823	11.5406	4.64771	2.99356e-05	0.000437015	2.16155
0ko95AO7dFRx4j70lU	MAPRE1	microtubule-associated protein, RP/EB family, member 1	0.339425	9.49151	7.32175	3.6053e-09	5.50368e-07	10.8937
Wh7h1xxeUl99fneZ6g	SLC26A8	solute carrier family 26, member 8	0.339039	7.79425	6.99825	1.07911e-08	1.15113e-06	9.82946
xeSJevQDS0dX0gkhOk	GYG1	glycogenin 1	0.339038	9.04022	4.83238	1.63475e-05	0.000284693	2.74242
BVfXJ7OF_Pu5fBZ3uE	DNASE2	deoxyribonuclease II, lysosomal	0.338067	8.35777	5.33745	3.04398e-06	8.1179e-05	4.36197
iX3qB7qexxL0p66.jk	FGL2	fibrinogen-like 2	0.337993	10.3521	2.99016	0.00452849	0.0195348	-2.57457
c7XeqIK5TrfK7e5VKE	MYD88	myeloid differentiation primary response gene (88)	0.337298	8.95339	5.4004	2.46334e-06	6.88026e-05	4.56637
ueklci9Mjof_oVJL.g	UBE2D3	ubiquitin-conjugating enzyme E2D 3	0.33685	9.65786	5.2495	4.08855e-06	0.000102404	4.07721
uV7ued.rpMIKh6e7z0	SFT2D1	SFT2 domain containing 1	0.335112	9.27123	4.57065	3.84597e-05	0.000532482	1.92136
0epSD9AaXRyn3r45e4	NOD2	nucleotide-binding oligomerization domain containing 2	0.334954	8.21374	3.18461	0.00264571	0.0129448	-2.07869
f7CVXir4tLe37_e5Rk	ZC3HAV1	zinc finger CCCH-type, antiviral 1	0.334272	8.80007	6.1349	2.04215e-07	1.02285e-05	6.97649
iukTtSku4o.nszC_Xk	PANK2	pantothenate kinase 2	0.334263	8.60351	6.02494	2.96955e-07	1.3623e-05	6.61361
TRAA0nH_eU19GuEVGs	CD68	CD68 molecule	0.334174	8.02097	4.96524	1.05414e-05	0.00020764	3.16443
Hkie59ehuPV.6Ceheg	APOBEC3G	apolipoprotein B mRNA editing enzyme, catalytic polypeptide-like 3G	0.334001	8.46905	4.85584	1.51318e-05	0.000270525	2.8167
BX8NUpN76heFXLT68U	NA	NA	0.333525	9.80981	4.70498	2.48311e-05	0.00038301	2.34092
fuspSX4JTZEtyAfuyc	RHOT1	ras homolog gene family, member T1	0.33339	8.4944	5.72505	8.22601e-07	3.02212e-05	5.62688
iqhFLp9AfXr9OM34hk	BTN2A1	butyrophilin, subfamily 2, member A1	0.333285	8.8029	5.83567	5.65167e-07	2.26425e-05	5.99023
0U4fRITrcg3sV8VEzg	ARL6IP5	ADP-ribosylation-like factor 6 interacting protein 5	0.333061	10.0616	3.74799	0.000510464	0.00362151	-0.539194
rzbivnn.lS9r3hdjnk	ATP5A1	ATP synthase, H+ transporting, mitochondrial F1 complex, alpha subunit 1, cardiac muscle	0.332383	10.694	4.79799	1.83052e-05	0.000309894	2.63372
6dUoDtfd6beflfeLeU	ZFYVE26	zinc finger, FYVE domain containing 26	0.329249	8.10593	7.00683	1.04812e-08	1.13866e-06	9.85775
9zfU9dleVUilKJ3lfg	IFITM2	interferon induced transmembrane protein 2 (1-8D)	0.328868	13.6158	4.00188	0.000234432	0.002028	0.197157
r731U7Xo5R6C5Eefs4	NA	NA	0.328765	7.7129	7.63795	1.24189e-09	2.33951e-07	11.928
9XtThfqRKgveu0yM1Y	IDH1	isocitrate dehydrogenase 1 (NADP+), soluble	0.328093	8.25357	7.49439	2.01311e-09	3.39918e-07	11.4592
ofV37VgjeZdy5f_Kr0	FAM129B	family with sequence similarity 129, member B	0.327961	8.17265	6.08693	2.40457e-07	1.16816e-05	6.81814
HuWssSMFXTAjnzcF1U	FAM111A	family with sequence similarity 111, member A	0.326101	9.03972	5.86047	5.19503e-07	2.10994e-05	6.07182
ftAQ7SMUT0K35lpJ9Y	NA	NA	0.325538	8.54515	3.00764	0.00431794	0.018847	-2.53082
3tH0U0E9eVSOn_49XU	TRIM21	tripartite motif containing 21	0.325423	8.47277	5.82903	5.78053e-07	2.2951e-05	5.96841
0SpIF3ghlHXUJfRXug	ADA	adenosine deaminase	0.325152	8.26392	5.98737	3.37457e-07	1.49766e-05	6.48973
uR8UXT_f96KU5DMpqE	HIST2H2BE	histone cluster 2, H2be	0.324692	8.57411	3.10775	0.00327854	0.0153022	-2.27706
QKS.WgEuFeIKfXXizk	LOC100170939	glucuronidase, beta pseudogene	0.324538	7.94516	4.09302	0.000176458	0.00163941	0.466987
fXL4oy0om0O5_xMi54	ATF4	activating transcription factor 4 (tax-responsive enhancer element B67)	0.32426	10.1692	5.37859	2.65085e-06	7.31172e-05	4.49551
xEJ7VZ5GJk3HuR3evQ	PSMB9	proteasome (prosome, macropain) subunit, beta type, 9 (large multifunctional peptidase 2)	0.323291	9.61644	2.70746	0.00957973	0.0347405	-3.2579
HzqJNpx567t9VBpGis	CD74	CD74 molecule, major histocompatibility complex, class II invariant chain	0.323228	8.31005	3.09884	0.00336057	0.0155824	-2.29988
cZUqab.lwTUpb3vFAg	HIST2H2AC	histone cluster 2, H2ac	0.322737	8.41702	2.77573	0.00802342	0.0302359	-3.09718
Newpugyi_dLo_vc77o	UBE2E1	ubiquitin-conjugating enzyme E2E 1	0.322085	8.95967	4.68872	2.61859e-05	0.00039871	2.28994
xjgDpC9Xp.X3nQf07c	BTN3A2	butyrophilin, subfamily 3, member A2	0.32189	8.2039	4.48555	5.06479e-05	0.000648498	1.65776
li8BCeepAuFNnSpptc	H2AFJ	H2A histone family, member J	0.321623	8.57921	3.1844	0.00264728	0.0129461	-2.07924
fgQ1ax7FM0tf7qyysk	SPG11	spastic paraplegia 11 (autosomal recessive)	0.321551	8.60153	6.31705	1.09777e-07	6.33201e-06	7.57837
0XlXNHLk57pSEjhF.4	PLIN2	perilipin 2	0.321518	8.36488	5.70394	8.83615e-07	3.1852e-05	5.55764
3h4ZBUbsHtJaleLDZ8	CEBPB	CCAAT/enhancer binding protein (C/EBP), beta	0.32105	11.7079	3.79414	0.000443803	0.00325149	-0.407099
E3nSlX0nHlH2XxNXng	41521	septin 4	0.320721	7.66494	4.69467	2.56818e-05	0.000393062	2.30859
ltFe_XOooroKP6QnQU	FUCA1	fucosidase, alpha-L- 1, tissue	0.319267	8.13327	7.45863	2.27106e-09	3.7585e-07	11.3422
ByBzz4UZddQtUmJW7E	NA	NA	0.319246	7.78366	4.42998	6.05724e-05	0.000739021	1.48659
HXyt34Sg3ldISUofq0	SRGN	serglycin	0.319111	12.0817	2.59385	0.0127974	0.0432806	-3.51897
WRv9U.le6dHt8Q0ee4	LPXN	leupaxin	0.319026	9.85358	4.43442	5.97137e-05	0.000731266	1.50024
EfHceP1VSHuP.gfX5c	SLFN11	schlafen family member 11	0.319008	8.34081	6.41478	7.86696e-08	5.06575e-06	7.90156
Nql4j95H8BCddcrijk	IFIT5	interferon-induced protein with tetratricopeptide repeats 5	0.3186	7.66269	8.0261	3.39033e-10	8.33833e-08	13.1874
KaBM1LHXr1yuJK45VI	IFNGR1	interferon gamma receptor 1	0.318199	9.68386	3.46329	0.00119041	0.00699161	-1.3349
BBrXyFWe5Xueyff1KU	OSCAR	osteoclast associated, immunoglobulin-like receptor	0.318063	8.41805	4.13088	0.000156711	0.00149115	0.579859
9l33dCXn0jTC99RE3U	GAPT	GRB2-binding adaptor protein, transmembrane	0.316968	8.73869	2.65567	0.0109411	0.0384719	-3.37792
3qgoyrjvWCuKJ_AVuk	ASGR1	asialoglycoprotein receptor 1	0.316691	8.63269	3.53326	0.000969413	0.00598757	-1.14253
HlO0WJVPj1SKt8tegI	MYOF	myoferlin	0.316184	7.70157	7.27732	4.1898e-09	5.8333e-07	10.7478
lpflJe7n7qBF_xeJ8Q	CSRNP1	cysteine-serine-rich nuclear protein 1	0.316003	8.54735	3.19283	0.00258528	0.0127132	-2.05728
Tuv1UFvUApz9AoFJUY	SLA	Src-like-adaptor	0.315434	9.83831	3.65331	0.000678668	0.00449939	-0.807557
3v60KrK5BUOhR85AI4	PNRC2	proline-rich nuclear receptor coactivator 2	0.315308	8.81044	4.10932	0.000167678	0.00157186	0.515517
xqkU.S7AJLXHfURygo	PSMA4	proteasome (prosome, macropain) subunit, alpha type, 4	0.315065	8.4228	3.9157	0.000305991	0.0024742	-0.0554041
WbS5faHtz_F5LUlzpc	DYNLT1	dynein, light chain, Tctex-type 1	0.314821	8.77387	3.96574	0.000262209	0.0022058	0.0909345
u4rV4sNRVJwKQFfQ0o	NA	NA	0.313899	8.02038	4.42333	6.18811e-05	0.000751701	1.46615
i7o1RUDUHTXr_eRHr0	HIST1H2BD	histone cluster 1, H2bd	0.31339	8.22636	2.73364	0.00895254	0.0329862	-3.19659
Nu9fPuCJhEHl55f1Ek	USP3	ubiquitin specific peptidase 3	0.313232	9.27758	6.92549	1.38179e-08	1.39026e-06	9.58946
iXftIjXcUSE8MniSiU	B4GALT5	UDP-Gal:betaGlcNAc beta 1,4- galactosyltransferase, polypeptide 5	0.312005	9.41845	3.18137	0.00266983	0.0130384	-2.0871
lGLhY85.f6XE9.Pea4	PPP1CC	protein phosphatase 1, catalytic subunit, gamma isozyme	0.311135	9.62293	4.42984	6.05994e-05	0.000739021	1.48616
xnrgFWCNBGfQHSVfoE	AIM2	absent in melanoma 2	0.310751	7.87024	5.51586	1.66928e-06	5.11411e-05	4.94239
xKXCKf3Uoo8n6L3cx0	CEACAM1	carcinoembryonic antigen-related cell adhesion molecule 1 (biliary glycoprotein)	0.310479	7.94033	4.97589	1.0176e-05	0.000202925	3.19839
HiCg3odVNVUUowC14U	C19orf66	chromosome 19 open reading frame 66	0.310467	7.94673	6.45337	6.89724e-08	4.62638e-06	8.02918
0YsncAQFF4UIqC4n7k	ARPC5	actin related protein 2/3 complex, subunit 5, 16kDa	0.310267	11.344	4.43725	5.91733e-05	0.000725693	1.50894
TSISafkv10IoiB8tRQ	CD163	CD163 molecule	0.31007	7.93231	5.51972	1.64766e-06	5.07421e-05	4.95499
Bu43rRzuHl.Gv3dTuc	PTPRE	protein tyrosine phosphatase, receptor type, E	0.309676	9.67612	5.6019	1.24818e-06	4.07574e-05	5.22347
33obrCQopAnZlAmA1Y	HIST1H2AC	histone cluster 1, H2ac	0.309309	9.35038	3.65775	0.000669695	0.00445658	-0.795031
xXt7d1N7_uqsieNSJE	CTSD	cathepsin D	0.307321	8.87848	3.08737	0.00346892	0.0159885	-2.32917
cCKea4lD8iVAiVYqBc	CDKN1C	cyclin-dependent kinase inhibitor 1C (p57, Kip2)	0.30716	7.78731	3.98744	0.000245173	0.00209939	0.154649
BJz1WZHpIAd6LwpQ4I	CCT8	chaperonin containing TCP1, subunit 8 (theta)	0.306595	9.1888	3.94116	0.000282894	0.00233761	0.0189559
uR.XnXd7dyREHuDte4	ACTA2	actin, alpha 2, smooth muscle, aorta	0.302944	8.06196	3.81475	0.000416833	0.00309488	-0.347869
04RV5U.3t.DwUK7yu4	SRP9	signal recognition particle 9kDa	0.301597	9.21039	2.62566	0.011809	0.0407472	-3.4467
lq1513QX4LVRs4vRS4	UQCRFS1	ubiquinol-cytochrome c reductase, Rieske iron-sulfur polypeptide 1	0.301104	9.38448	5.53533	1.56309e-06	4.86453e-05	5.00592
HhSf37RfitV2VbRFvM	MICB	MHC class I polypeptide-related sequence B	0.301023	7.96231	5.68547	9.40671e-07	3.31161e-05	5.49709
BVKs8ehc7rs_8BS7X4	ARGLU1	arginine and glutamate rich 1	0.300555	9.43094	2.6247	0.0118377	0.0408144	-3.44888
Q91CSC4mep7.LlKea4	PRDX1	peroxiredoxin 1	0.300165	8.87709	5.35346	2.88457e-06	7.75112e-05	4.41391
BkovoTdSk.RIuzQJ0o	NA	NA	0.29952	7.98644	4.20757	0.000123077	0.00124896	0.80987
fnnsEqHJEhEaOLqtP0	CD86	CD86 molecule	0.299237	7.93784	5.82596	5.84108e-07	2.30879e-05	5.95832
cXSOUqt53JNLCz8kgE	SSR1	signal sequence receptor, alpha	0.299008	8.65679	4.61658	3.31292e-05	0.000472344	2.06436
l1eve9T.iYD6X6gAUY	STX11	syntaxin 11	0.298668	9.34542	3.15919	0.00284098	0.0137005	-2.14463
9uj4uUrk1CH9XV9SCk	NUB1	negative regulator of ubiquitin-like proteins 1	0.298527	8.58033	3.84913	0.000375314	0.00286221	-0.248679
0UW.0SogkrcodV5F.k	CD300C	CD300c molecule	0.298073	7.9814	5.67568	9.72379e-07	3.39623e-05	5.46501
xoigxw81PX.pXkk7Tk	TUBA1B	tubulin, alpha 1b	0.297934	11.179	3.69593	0.00059722	0.00408916	-0.687177
3V0ZFZ0ZFdrg1_uOP8	EPN1	epsin 1	0.296949	9.81782	3.41036	0.00138875	0.00786443	-1.47899
iuXtF7fR5df9XtOdNI	CAP1	CAP, adenylate cyclase-associated protein 1 (yeast)	0.296049	11.8879	4.29641	9.28567e-05	0.00100692	1.07851
Z.kCpQP1UB4Gp0oDvU	PSTPIP2	proline-serine-threonine phosphatase interacting protein 2	0.29586	8.06418	4.77219	1.99238e-05	0.000326676	2.55232
ckVlv.vS3FR3SrBDl0	LPAR6	lysophosphatidic acid receptor 6	0.295832	7.85223	4.48391	5.09161e-05	0.000649584	1.65271
ZVKEnkqyI0.wufui_E	BTN3A3	butyrophilin, subfamily 3, member A3	0.295009	8.1788	5.95318	3.79078e-07	1.64267e-05	6.37705
6R7R.SJ2unRJu15Vr8	GNA15	guanine nucleotide binding protein (G protein), alpha 15 (Gq class)	0.29335	8.12409	5.31819	3.24733e-06	8.5571e-05	4.29954
iOR_kvDo3nvnou4m6E	C18orf25	chromosome 18 open reading frame 25	0.293293	8.41083	5.63546	1.11421e-06	3.73682e-05	5.33329
KVUKHfn10JX3p9vzrc	TMX2	thioredoxin-related transmembrane protein 2	0.292421	8.39817	8.5541	5.92277e-11	2.09761e-08	14.8782
6H3H5QTeX56H7Oo_3U	SRBD1	S1 RNA binding domain 1	0.291838	7.90402	8.2477	1.62491e-10	4.96102e-08	13.9004
Ki3QtbOwNI3Vd0VdUU	SPI1	spleen focus forming virus (SFFV) proviral integration oncogene spi1	0.291456	10.3234	3.17431	0.00272324	0.0132299	-2.10544
3rFaUE0Lh.MnkIDus4	NA	NA	0.29144	8.7909	3.8409	0.000384878	0.00292006	-0.272474
xU3nwV_nUUwpHqHaP0	GSTK1	glutathione S-transferase kappa 1	0.291022	10.0249	4.37214	7.29186e-05	0.000840653	1.30929
Eh6Qr9cidx8SBJXil4	GSTO1	glutathione S-transferase omega 1	0.289034	9.5255	4.86754	1.45598e-05	0.000263624	2.85375
iaYUGHUQ1yMK435VJ0	CD37	CD37 molecule	0.288781	10.2421	3.38525	0.0014935	0.00834638	-1.5469
0VUoQQHlfCLT9fvNEo	KIAA0528	KIAA0528	0.288688	8.21443	5.76492	7.18554e-07	2.7482e-05	5.75777
3WVCS7lckigDkE3ZCY	DERA	deoxyribose-phosphate aldolase (putative)	0.288559	8.36232	6.15534	1.90479e-07	9.69254e-06	7.04399
KCF62234f6QOJaJV_o	IFNGR2	interferon gamma receptor 2 (interferon gamma transducer 1)	0.288112	10.925	4.34735	7.89353e-05	0.000890302	1.23356
9l5aOODpOCeLpYiPhs	HNRNPM	heterogeneous nuclear ribonucleoprotein M	0.287176	10.012	3.61208	0.000767525	0.0049682	-0.923275
BS79uCu_iKp7t6uKjo	ATF5	activating transcription factor 5	0.286933	8.02473	4.99323	9.6074e-06	0.000193988	3.25374
r4UKUSJzq7SRSj_CUo	HSH2D	hematopoietic SH2 domain containing	0.28617	8.24613	3.38128	0.00151073	0.00840996	-1.5576
QSZJJdoVo_b_XyaM78	EFHD2	EF-hand domain family, member D2	0.285452	11.4747	4.24934	0.000107835	0.0011226	0.935872
3t7o3njsS5f55zo0A0	TLE4	transducin-like enhancer of split 4 (E(sp1) homolog, Drosophila)	0.284405	8.43264	6.16497	1.84335e-07	9.40692e-06	7.07578
ciUoKIeRL.gJElbStY	RBCK1	RanBP-type and C3HC4-type zinc finger containing 1	0.284027	9.02748	3.28548	0.00198888	0.010423	-1.81379
ECu1ECuSIC6D3ak24k	NA	NA	0.283534	7.75466	4.01178	0.000227333	0.00198209	0.226337
in7S1rfIjFd.XguKbk	CMTM7	CKLF-like MARVEL transmembrane domain containing 7	0.283376	10.3114	3.58999	0.000819631	0.00521524	-0.984996
WESUj90JLdB1LV03RU	M6PR	mannose-6-phosphate receptor (cation dependent)	0.283228	9.01382	5.62707	1.14632e-06	3.82279e-05	5.30581
W3nzoL7lfR_vLBRdJQ	EIF4E3	eukaryotic translation initiation factor 4E family member 3	0.283169	9.06417	3.49086	0.00109815	0.00659185	-1.25938
Tp9JH1.ru.XtUuC_gU	MCM6	minichromosome maintenance complex component 6	0.282381	8.16792	5.17405	5.26224e-06	0.000122449	3.83378
Bzkii9KFxeipi5ei_c	HLA-F	major histocompatibility complex, class I, F	0.281755	9.48989	2.87822	0.00612132	0.0245685	-2.85068
WH4ug1.XRsdUSG3qXo	CAPZA2	capping protein (actin filament) muscle Z-line, alpha 2	0.281706	8.7658	2.62903	0.0117084	0.0404867	-3.43899
rkiktz5Chff55S80yk	EIF4G2	eukaryotic translation initiation factor 4 gamma, 2	0.281674	9.84691	4.00004	0.000235771	0.0020366	0.19175
ZlI600y0a67a757V70	ICAM2	intercellular adhesion molecule 2	0.280931	9.50442	3.85044	0.000373809	0.00285678	-0.244879
xnL3utKaRQ4gKDkhXU	RFX5	regulatory factor X, 5 (influences HLA class II expression)	0.280528	8.50283	7.16314	6.16744e-09	7.63728e-07	10.3725
rS7tfgXh4ye.wiUel4	FAM96A	family with sequence similarity 96, member A	0.280051	8.55197	3.81549	0.00041589	0.00308917	-0.345729
xnlUuzt_X3WbT76CKI	STARD7	StAR-related lipid transfer (START) domain containing 7	0.279913	9.09923	5.68035	9.57114e-07	3.35615e-05	5.48032
uUidyu.KSbuu3iKUyY	HNRNPAB	heterogeneous nuclear ribonucleoprotein A/B	0.279836	9.17202	4.66925	2.79052e-05	0.000416298	2.22892
f3uDfp6h9d4uOXirSc	SUSD1	sushi domain containing 1	0.279765	7.91594	6.23675	1.44335e-07	7.72169e-06	7.31296
u2qAe7ueCLG6id3uc0	ANKDD1A	ankyrin repeat and death domain containing 1A	0.279547	7.71865	4.08084	0.000183312	0.00168278	0.430766
luDHV5JAQiOkO.1_9U	NFE2L2	nuclear factor (erythroid-derived 2)-like 2	0.279413	8.60744	4.13717	0.000153647	0.00146911	0.59864
QDxzvalteTded2uVlo	CYBA	cytochrome b-245, alpha polypeptide	0.279245	11.954	2.92046	0.00546716	0.0226568	-2.74732
fTS1QQjpcgNk90XZfk	MTMR11	myotubularin related protein 11	0.278035	8.39008	3.72943	0.000539907	0.0037832	-0.592084
xZdHl8F8HvfXpnACJ4	GLTP	glycolipid transfer protein	0.277858	9.32045	4.81366	1.73865e-05	0.000297469	2.6832
HbeRIp6zv5TSJGmAD4	PSMC2	proteasome (prosome, macropain) 26S subunit, ATPase, 2	0.277399	8.20133	5.4463	2.11059e-06	6.08939e-05	4.71568
Tv66R568VepXg6JwDQ	ZNFX1	zinc finger, NFX1-type containing 1	0.277202	8.68636	3.38724	0.00148493	0.00830549	-1.54152
9Tqgu5Unp6AXpLjFNA	PRDX1	peroxiredoxin 1	0.276666	8.85584	4.96875	1.04197e-05	0.000205699	3.17561
NSVUBJUuWEU_9f0R.U	PTPRE	protein tyrosine phosphatase, receptor type, E	0.275855	9.22736	5.49089	1.81603e-06	5.36865e-05	4.86094
KoV75wlUkJDXKyr8NU	EIF4A2	eukaryotic translation initiation factor 4A2	0.275609	10.0297	2.80483	0.00743398	0.028506	-3.02781
6nGQ7l7rVHDe4ede6A	SP100	SP100 nuclear antigen	0.274022	7.80781	6.38095	8.82865e-08	5.48553e-06	7.78968
BpKxb3A3gEq4ydAvlM	WIPF1	WAS/WASL interacting protein family, member 1	0.273724	9.38682	2.84693	0.00665213	0.026142	-2.92658
osUOrmeQ1ISw95AeX4	SRGN	serglycin	0.273005	12.4559	2.5358	0.0147988	0.0482076	-3.6492
KJw_09TFdEO1dgvouU	ITFG1	integrin alpha FG-GAP repeat containing 1	0.272635	8.1481	8.03339	3.30902e-10	8.31945e-08	13.211
WivoNh9FOqtfSUk1J0	FTSJD2	FtsJ methyltransferase domain containing 2	0.272056	7.80489	5.36333	2.79042e-06	7.56704e-05	4.44595
Q1mTUfvktQtdy5BlMk	TOR1AIP1	torsin A interacting protein 1	0.271528	9.16398	5.12532	6.19166e-06	0.000138612	3.67697
KbzWyP3JOC8l0Y57kA	XRN1	5'-3' exoribonuclease 1	0.271304	8.22995	5.27143	3.79889e-06	9.72122e-05	4.14812
NkI6tAtIuutOteiukI	PSMC1	proteasome (prosome, macropain) 26S subunit, ATPase, 1	0.270965	9.29144	4.80569	1.7848e-05	0.000303736	2.65802
Ti7MlU37rB_efeR9M0	LAMP3	lysosomal-associated membrane protein 3	0.270902	7.60513	4.84486	1.56894e-05	0.00027634	2.78191
6C96ScAjhZvgpRdfek	ARRB1	arrestin, beta 1	0.270144	8.08569	4.28547	9.61441e-05	0.00103472	1.04531
HVpqp3XpC0oK.e_cMw	ADCY7	adenylate cyclase 7	0.26939	8.11924	7.27752	4.18694e-09	5.8333e-07	10.7485
TK6x0JTnl18TX.6BIk	DBNDD2	dysbindin (dystrobrevin binding protein 1) domain containing 2	0.269387	8.52473	6.28118	1.24052e-07	6.90792e-06	7.4598
N1X_r0.nv_X4oJhjlU	BRI3	brain protein I3	0.269324	9.8429	3.26055	0.00213507	0.0110195	-1.87973
obghXh6whTR3YLoli4	UBC	ubiquitin C	0.268283	13.6901	3.93969	0.000284181	0.00234583	0.014653
rkrc6lHkojiFJfe70U	CMTM3	CKLF-like MARVEL transmembrane domain containing 3	0.268227	9.37119	4.7307	2.28265e-05	0.000359208	2.42172
ZLhT4A0V03lFF1Tu9I	ATG3	ATG3 autophagy related 3 homolog (S. cerevisiae)	0.268153	8.61458	4.2757	9.91778e-05	0.00105653	1.01568
3nqSAeSkRP6ujRen1I	ANKFY1	ankyrin repeat and FYVE domain containing 1	0.267964	8.09638	4.38307	7.04099e-05	0.000823712	1.34274
od7TlRDV.cKCHlccyQ	NBN	nibrin	0.267366	8.14561	4.89771	1.31797e-05	0.000244128	2.94952
QonlKjn8So.CNEW1Tk	SNRPB2	small nuclear ribonucleoprotein polypeptide B	0.26707	8.50931	5.96206	3.67794e-07	1.60812e-05	6.40632
u0YEMn5ncd7Lzuj5Yk	MFSD1	major facilitator superfamily domain containing 1	0.266899	8.73374	4.35882	7.60933e-05	0.000866534	1.26858
Hkivjf56gEnoI6GRXs	UBC	ubiquitin C	0.266897	13.8571	4.23762	0.000111913	0.00115555	0.900481
W0o.y5_UUUjiC8JJf0	HSPD1	heat shock 60kDa protein 1 (chaperonin)	0.2663	9.10002	3.56097	0.000893245	0.00559716	-1.06575
90TCtf5.3_7wiofl3s	RCBTB2	regulator of chromosome condensation (RCC1) and BTB (POZ) domain containing protein 2	0.265428	8.41825	4.78017	1.94088e-05	0.000322415	2.57748
loI5Vh9.pS46oNLi50	XPNPEP1	X-prolyl aminopeptidase (aminopeptidase P) 1, soluble	0.264743	8.62901	5.89343	4.64462e-07	1.95826e-05	6.18028
0gLsZQcKhUQJKSKw5I	LGALS8	lectin, galactoside-binding, soluble, 8	0.264565	7.97562	7.73633	8.92655e-10	1.85966e-07	12.2484
umiL0YHuVBk7zJSrXE	TNS3	tensin 3	0.26449	7.80944	5.9183	4.26814e-07	1.82561e-05	6.26215
oB6l_EC7AWTo6n1UKM	COX5A	cytochrome c oxidase subunit Va	0.26309	9.68048	3.82771	0.00040069	0.00300653	-0.310539
ike2dzggSeqZez7Xug	SMS	spermine synthase	0.262465	8.69842	6.2514	1.37305e-07	7.52752e-06	7.36138
0.PRu.vXrqQjlN4p9I	ERICH1	glutamate-rich 1	0.262169	8.3377	3.29469	0.0019373	0.0102192	-1.78935
B1LqutLKIkb0ioIlN0	ATP6V0E1	ATPase, H+ transporting, lysosomal 9kDa, V0 subunit e1	0.26036	10.8837	4.39568	6.76223e-05	0.000798836	1.38134
up7nZVehL4n_jzfXfQ	FAM198B	family with sequence similarity 198, member B	0.260212	7.8742	4.5822	3.70444e-05	0.000517336	1.95729
i8lcq61QU7jt6JMo5M	CLK1	CDC-like kinase 1	0.259766	8.76093	2.71645	0.00935984	0.0340967	-3.23688
cXfiegZeAeiXRgqeec	SLC3A2	solute carrier family 3 (activators of dibasic and neutral amino acid transport), member 2	0.259686	8.01009	6.24305	1.41269e-07	7.62209e-06	7.33377
rSVnok4ne7sWIHquO8	PRNP	prion protein	0.259157	8.16903	5.2439	4.16589e-06	0.000103464	4.05913
Tid4J.g09LrojpfesE	TMEM66	transmembrane protein 66	0.258514	11.3138	3.89484	0.000326258	0.00258805	-0.116135
cVe.FY7OgMClf9deAA	TIAF1	TGFB1-induced anti-apoptotic factor 1	0.258292	8.55991	4.52781	4.41839e-05	0.000589163	1.78847
c0fqKhkyCidygRLlLk	STOM	stomatin	0.257614	9.3523	2.82415	0.00706519	0.0273944	-2.98149
Nt9PX86l_enqn8Egdo	TMEM60	transmembrane protein 60	0.257543	8.20232	7.17935	5.83764e-09	7.27978e-07	10.4259
0XHqK6hV.T.S.503Kg	H2AFY	H2A histone family, member Y	0.257518	8.87188	3.87131	0.000350683	0.00273203	-0.184467
9d7vd7PscFBdUDZ4nk	ARL5A	ADP-ribosylation factor-like 5A	0.257164	9.6342	2.91068	0.00561262	0.0231222	-2.77135
oVKi52KZNKVv.xS.M0	RHBDF2	rhomboid 5 homolog 2 (Drosophila)	0.256823	8.35634	4.96902	1.04105e-05	0.000205699	3.17647
9oSIezKeFIJOeeDzQY	CD48	CD48 molecule	0.256565	9.98748	2.63008	0.0116773	0.0404188	-3.4366
Qn9O1SB8l.F7gu8cSU	CYP1B1	cytochrome P450, family 1, subfamily B, polypeptide 1	0.255983	8.03034	3.44982	0.00123815	0.00720988	-1.3717
rSqD0GF4gK0UKJLqEU	DECR1	2,4-dienoyl CoA reductase 1, mitochondrial	0.254768	9.84076	4.08806	0.000179221	0.00165675	0.452218
B.fZp50I4Fh32oCYBU	CHMP5	chromatin modifying protein 5	0.254504	7.70104	5.72368	8.26424e-07	3.02988e-05	5.62239
B6OUaNKAl6J4JQXViQ	KIAA0319L	KIAA0319-like	0.253877	7.8013	3.89931	0.000321811	0.00256836	-0.103141
0ft07bSUkUJfvqRzSo	ATP5A1	ATP synthase, H+ transporting, mitochondrial F1 complex, alpha subunit 1, cardiac muscle	0.253428	10.4059	3.6777	0.000630846	0.00426049	-0.73877
NljpTCmu9ukaueHphw	NA	NA	0.25222	7.93743	4.38755	6.94064e-05	0.000815557	1.35645
uUdeqoN60V4nuAQL50	NA	NA	0.251544	7.80137	4.24435	0.000109552	0.0011378	0.920814
rnkqtLjonn0q7o6bTA	TRIM5	tripartite motif containing 5	0.251418	7.77737	6.35508	9.64277e-08	5.78407e-06	7.70412
opFu1C.8gV_8lIWK7U	WDR1	WD repeat domain 1	0.25089	10.5503	3.27931	0.00202416	0.0105672	-1.83014
N_flnpOXig7P6f48RE	NFKBIZ	nuclear factor of kappa light polypeptide gene enhancer in B-cells inhibitor, zeta	0.250641	8.9498	3.1236	0.00313738	0.0147797	-2.23641
xVZRQfH8UXOHsftLOI	ACSL3	acyl-CoA synthetase long-chain family member 3	0.250468	7.86179	7.84847	6.13225e-10	1.35737e-07	12.6126
ZKnvriJIfiuOMvpd60	ARL6IP1	ADP-ribosylation factor-like 6 interacting protein 1	0.250416	9.45893	3.14153	0.00298464	0.0142228	-2.19027
r8oqKOwMlkQKrUEnf4	BTK	Bruton agammaglobulinemia tyrosine kinase	0.250309	8.76258	4.39832	6.7052e-05	0.000793687	1.38944
fbh9J9GPthWuH1UueA	MILR1	mast cell immunoglobulin-like receptor 1	0.250097	7.87447	6.23571	1.4485e-07	7.72589e-06	7.3095
fQUKE7FMBwIUiX17RU	GBP1P1	guanylate binding protein 1, interferon-inducible pseudogene 1	0.250057	7.67641	4.44932	5.69196e-05	0.000704847	1.54607
9le_SKQ.juhPfN2oRE	VPS29	vacuolar protein sorting 29 homolog (S. cerevisiae)	0.250046	8.60458	3.85657	0.000366871	0.0028148	-0.227159
rXfTkN64kuuSmqJSIA	DDX58	DEAD (Asp-Glu-Ala-Asp) box polypeptide 58	0.250005	7.81741	6.19273	1.67694e-07	8.7339e-06	7.16751
c60kdSyYiGkVINI1Sc	PEPD	peptidase D	0.249667	8.34841	6.30191	1.15589e-07	6.56041e-06	7.52833
Wr.mnL6c9CAXZV3g7Q	C19orf2	chromosome 19 open reading frame 2	0.249347	8.62293	4.13842	0.000153046	0.00146494	0.602372
i7k.0Xiv1eTV5LlAlU	GLB1	galactosidase, beta 1	0.249261	8.44691	4.27596	9.9095e-05	0.00105646	1.01648
inreqMnokfHSunrgOE	ERP29	endoplasmic reticulum protein 29	0.249103	10.4721	3.89094	0.000330188	0.00260676	-0.127471
fs05Kte43JSiSU8Fy4	NA	NA	0.248923	7.73384	5.69339	9.15755e-07	3.24974e-05	5.52307
rL00II6uFF4UV1Ep6U	NA	NA	0.24813	12.3373	2.58937	0.0129426	0.0435967	-3.5291
TPtCTeird3ginNOieA	PGAM1	phosphoglycerate mutase 1 (brain)	0.248033	9.10869	3.38068	0.00151337	0.00842196	-1.55922
og2g3eqvqFSQqR8EBU	C3AR1	complement component 3a receptor 1	0.247939	7.7451	4.61833	3.29402e-05	0.000470028	2.06984
rkS_KJSIffA018gW4U	CNIH4	cornichon homolog 4 (Drosophila)	0.247832	8.20428	3.64928	0.00068689	0.00454029	-0.818888
fdT.UAsIh1JOl97_VY	CYB5B	cytochrome b5 type B (outer mitochondrial membrane)	0.246804	8.91883	5.62578	1.15132e-06	3.83225e-05	5.3016
cenjghL3z_jikk3kXk	CHMP5	chromatin modifying protein 5	0.24656	7.81192	5.24299	4.17856e-06	0.000103633	4.0562
i.1X2t9RJLPPt.ui_E	OXR1	oxidation resistance 1	0.246134	7.97245	4.16221	0.000142011	0.00138782	0.673593
BvbSF1O9XbjVAYdHXw	DARS	aspartyl-tRNA synthetase	0.245868	9.43616	4.32077	8.59239e-05	0.00094741	1.15256
TXSYS7JtO8iiGN4VFI	VDAC3	voltage-dependent anion channel 3	0.24556	9.29685	5.1211	6.27955e-06	0.000140048	3.66338
feETXd.kJ54epEdOUI	UBE2A	ubiquitin-conjugating enzyme E2A	0.245549	8.41047	5.51513	1.67338e-06	5.11782e-05	4.94001
K76SYRTVMSnfF33Xio	SP140	SP140 nuclear body protein	0.245164	8.20012	3.72456	0.000547888	0.0038227	-0.605921
9iUjWS66IvcO_Hv5KU	CEPT1	choline/ethanolamine phosphotransferase 1	0.244659	8.36393	4.41625	6.33033e-05	0.00076205	1.44443
cuu9Th9IsTU5otTz_I	41519	septin 2	0.24457	9.30246	2.93882	0.00520371	0.0217615	-2.70208
0VIQl.rqgSBdZNuy.4	RGS19	regulator of G-protein signaling 19	0.244468	8.67424	3.60144	0.000792216	0.00508834	-0.953033
KNCCAeJCl4meV5F1kg	UPP1	uridine phosphorylase 1	0.244418	8.88794	4.16831	0.00013931	0.00136974	0.691878
QOOmuiuuvsu46NV.K8	APOL3	apolipoprotein L, 3	0.244037	8.27472	4.48426	5.08593e-05	0.000649544	1.65378
WAfno9OSUn_SvNIjQI	PTPN12	protein tyrosine phosphatase, non-receptor type 12	0.243883	8.32864	4.26162	0.000103712	0.00108864	0.973043
B_01.ieeHlDBPfY3eo	JAK2	Janus kinase 2	0.243395	7.69683	6.63158	3.75739e-08	2.84703e-06	8.61854
0k9.tSbh87FSAgpd.k	CYSLTR1	cysteinyl leukotriene receptor 1	0.243385	7.95639	6.85139	1.77775e-08	1.63111e-06	9.34488
cX4LnsUuenkrPC1C.M	BAZ1A	bromodomain adjacent to zinc finger domain, 1A	0.243233	8.39103	3.39507	0.0014517	0.00815051	-1.52039
Tp3nvutucBZ13CjuXc	GBA	glucosidase, beta, acid	0.242809	8.34297	4.20063	0.000125808	0.00126868	0.788963
ZfczqFYPIR54NexJfE	DEGS1	degenerative spermatocyte homolog 1, lipid desaturase (Drosophila)	0.242623	9.01543	4.55713	4.01824e-05	0.000546925	1.87939
rd4._XejLI3Ym.N2p8	SUZ12	suppressor of zeste 12 homolog (Drosophila)	0.241985	9.17953	2.57101	0.0135533	0.0450624	-3.57047
umjOoR8Axx_nVCNijg	PCNA	proliferating cell nuclear antigen	0.241797	8.15015	3.68938	0.000609096	0.00414672	-0.705726
Wh0iPd.7USEtN0okgI	CLEC7A	C-type lectin domain family 7, member A	0.241793	7.87732	4.97347	1.02579e-05	0.000204012	3.19068
TXw.koeX66f7_eoQpU	TPST2	tyrosylprotein sulfotransferase 2	0.241405	9.26975	3.24047	0.00226015	0.011485	-1.9326
6kmUJpNRQk0L6IAqBU	TM9SF4	transmembrane 9 superfamily protein member 4	0.241151	8.41216	3.98493	0.000247084	0.00211106	0.147286
6h9R5TXVCqVA9.S6cU	CXCL10	chemokine (C-X-C motif) ligand 10	0.241126	7.57258	3.22485	0.00236227	0.0118636	-1.97362
cdeqd0u5TIoSQeuPv0	HLA-DMB	major histocompatibility complex, class II, DM beta	0.239965	10.3343	2.65773	0.0108836	0.0383317	-3.37317
ZhcUqEJKwieO4u7uOo	CD1D	CD1d molecule	0.238782	8.42334	3.11591	0.00320519	0.0150351	-2.25617
No2Sg0qgLj.Arr91JE	RAP2C	RAP2C, member of RAS oncogene family	0.238736	8.17762	4.27985	9.78796e-05	0.00104728	1.02825
35p0LR0invk.SpzvrU	SAE1	SUMO1 activating enzyme subunit 1	0.238366	9.27335	4.06464	0.000192828	0.00174482	0.382671
Bt6KgN6YBfb_Kh47i4	RNF114	ring finger protein 114	0.23835	9.43046	4.01431	0.000225553	0.00196948	0.233799
xI7v9InKxIoO.nF.Jo	FAM198B	family with sequence similarity 198, member B	0.238162	7.83371	4.51361	4.62614e-05	0.000604574	1.74447
0VT9Ov9LpB8eFfv.l4	SNTB1	syntrophin, beta 1 (dystrophin-associated protein A1, 59kDa, basic component 1)	0.237638	7.85054	7.30752	3.78296e-09	5.6293e-07	10.847
TFeicuigHuSnOiuiwk	PSMB10	proteasome (prosome, macropain) subunit, beta type, 10	0.237279	11.1913	2.78275	0.00787751	0.0297939	-3.0805
NovrfJZ5KJX3.e6PTQ	TMBIM4	transmembrane BAX inhibitor motif containing 4	0.237175	10.136	3.54384	0.000939636	0.0058366	-1.11326
3_kIS4goe5yDop0Xno	CLEC4A	C-type lectin domain family 4, member A	0.236321	8.4134	4.05443	0.000199073	0.00178672	0.352385
cgIUSICkSXnQXnjgXk	PSMA1	proteasome (prosome, macropain) subunit, alpha type, 1	0.23592	9.1125	4.92437	1.20683e-05	0.000228563	3.03426
Nken96etBzOAX709dY	ZBTB33	zinc finger and BTB domain containing 33	0.235782	8.41747	3.89459	0.000326511	0.00258805	-0.116869
9kYHoe7kGf.qIOO1W8	LDLR	low density lipoprotein receptor	0.235597	7.98847	4.03332	0.000212605	0.00188712	0.289926
izRD5RU2r.q7u.0ybo	NSMAF	neutral sphingomyelinase (N-SMase) activation associated factor	0.235572	8.49541	4.25079	0.000107339	0.00111941	0.940266
ul141JapUj1HivItT8	REC8	REC8 homolog (yeast)	0.235472	8.0566	5.27028	3.81352e-06	9.74457e-05	4.14441
3hfnCnAg1eASmbT3d4	CCDC109B	coiled-coil domain containing 109B	0.235395	9.27569	3.94571	0.000278951	0.00231583	0.0322583
Q4hQpSTQ9SE3071wyk	EFHA1	EF-hand domain family, member A1	0.235059	8.20218	3.69017	0.000607661	0.00414023	-0.703504
lCd16F_h0SeFVLqS9Q	LILRA5	leukocyte immunoglobulin-like receptor, subfamily A (with TM domain), member 5	0.234881	8.00061	3.72937	0.000539996	0.0037832	-0.59224
3idlziQukCldAwlXXo	CLIC1	chloride intracellular channel 1	0.234849	10.5946	2.69651	0.00985382	0.0354585	-3.28341
c536E8_p_SL1fPeqPE	HNRNPR	heterogeneous nuclear ribonucleoprotein R	0.234846	8.95605	3.44447	0.00125762	0.0073055	-1.38629
Tp4_Q96VB0Fd3_hZD4	ATP6V0E1	ATPase, H+ transporting, lysosomal 9kDa, V0 subunit e1	0.234294	9.9536	3.37073	0.00155747	0.00861058	-1.58603
ZbnsZYTQjog6gtQqu4	HNRNPM	heterogeneous nuclear ribonucleoprotein M	0.23419	9.45125	3.27562	0.00204551	0.0106441	-1.83989
xqBV_4k50s0_6IFCKk	EWSR1	Ewing sarcoma breakpoint region 1	0.234172	8.9055	4.32212	8.55538e-05	0.000945486	1.15668
f7lznxro6giLVCo5Kk	AKR1A1	aldo-keto reductase family 1, member A1 (aldehyde reductase)	0.234099	8.69512	4.383	7.04258e-05	0.000823712	1.34252
QpDl0uP1SSNPa30F9U	GPBP1	GC-rich promoter binding protein 1	0.233371	8.33339	4.11324	0.000165628	0.00156046	0.527212
WooPoHIO7h3uqHkyv4	ARL8B	ADP-ribosylation factor-like 8B	0.233345	8.45847	4.86522	1.46716e-05	0.000264566	2.8464
6fhMoz.V3pxE9FxX70	MIS18BP1	MIS18 binding protein 1	0.233273	8.15164	3.98287	0.000248665	0.00212108	0.141236
BUE.uXS6zuSSOCIqUg	ZC3HAV1	zinc finger CCCH-type, antiviral 1	0.233266	8.14064	4.19917	0.000126388	0.00127043	0.784581
Kvvgu6L7B3m6HOhLQQ	CALM2	calmodulin 2 (phosphorylase kinase, delta)	0.233097	10.9323	2.81298	0.00727632	0.028029	-3.0083
iosY7sLlT6ul760e5I	PSMC1	proteasome (prosome, macropain) 26S subunit, ATPase, 1	0.233092	9.55439	4.9055	1.28452e-05	0.000239434	2.97425
xfe6UjfjT0FLDrF4oE	PAG1	phosphoprotein associated with glycosphingolipid microdomains 1	0.232449	8.27133	3.92051	0.000301494	0.00244453	-0.0413776
lmWL3jqIrEr6vd5cU8	MYPOP	Myb-related transcription factor, partner of profilin	0.23236	8.4361	5.23929	4.23064e-06	0.00010434	4.04425
QToPpb6nxdefbhfXXk	COX8A	cytochrome c oxidase subunit VIIIA (ubiquitous)	0.232168	10.5001	2.95163	0.00502693	0.021195	-2.67041
cSj1OhRehCQFQHWCH4	CCL2	chemokine (C-C motif) ligand 2	0.231983	7.49794	3.23609	0.00228837	0.0115922	-1.94413
HrlpdGIdVMghRCK.TU	NAIP	NLR family, apoptosis inhibitory protein	0.231647	7.67508	5.05071	7.9379e-06	0.000166743	3.43757
cVLhH0iJ6y8sk74lKU	FOS	FBJ murine osteosarcoma viral oncogene homolog	0.231507	8.61567	3.20343	0.00250934	0.0124283	-2.02964
lrug9PjSge1K.PnlqI	PSMD6	proteasome (prosome, macropain) 26S subunit, non-ATPase, 6	0.230151	9.289	4.64559	3.01427e-05	0.000439315	2.15494
385O6Qm8fXuRslJXq0	OPRL1	opiate receptor-like 1	0.229843	8.42652	3.8364	0.000390202	0.00294782	-0.285465
QnO7Uqz51Xi7M4ueLI	BNIP2	BCL2/adenovirus E1B 19kDa interacting protein 2	0.22958	8.48877	3.52525	0.000992577	0.00609528	-1.16467
uYd0KR7s5XkL6e3OJM	TMCO1	transmembrane and coiled-coil domains 1	0.228482	8.28298	2.85552	0.0065023	0.0257015	-2.9058
NSKe6JirLKJ.1SLnuE	MOBKL2C	MOB1, Mps One Binder kinase activator-like 2C (yeast)	0.228373	8.33758	3.84614	0.000378763	0.00288231	-0.257329
Zl2lOS99FCpxSiFN0g	GCH1	GTP cyclohydrolase 1	0.228078	7.57916	6.4248	7.60293e-08	4.94973e-06	7.93468
WkKX3dSHNsF65fFC_4	RHOU	ras homolog gene family, member U	0.227978	7.85715	5.68286	9.49001e-07	3.33431e-05	5.48856
E_Ru6wkyn4IrqykrE4	KIAA1598	KIAA1598	0.227874	7.79668	4.44162	5.83462e-05	0.000718494	1.5224
xeSt1TgpRVOt46k4JM	TCN2	transcobalamin II	0.227873	7.64802	4.27926	9.8063e-05	0.00104861	1.02646
Ey6v5_K6wp.noV75KQ	RRM1	ribonucleotide reductase M1	0.2277	8.04085	5.21083	4.65347e-06	0.000112267	3.95235
THlLI4UtELgUfdL5Q0	FOXN2	forkhead box N2	0.227429	8.72153	3.12821	0.00309746	0.0146272	-2.22457
Niq0l_574oB.U6goUY	C17orf87	chromosome 17 open reading frame 87	0.227418	7.89042	4.0872	0.000179702	0.00165911	0.449666
WV_hIIelxckhej.314	C9orf91	chromosome 9 open reading frame 91	0.227385	7.69881	5.04945	7.97132e-06	0.000167247	3.43352
rpPv4ntU3Ue81f6v.w	TIA1	TIA1 cytotoxic granule-associated RNA binding protein	0.227127	8.04268	4.77421	1.97925e-05	0.000325126	2.55867
3lS.rqV9.Xof7oopFA	CD2BP2	CD2 (cytoplasmic tail) binding protein 2	0.227045	9.06848	4.47632	5.21779e-05	0.000660024	1.62928
lJ3ghEkVJfdkUlCXwc	MOV10	Mov10, Moloney leukemia virus 10, homolog (mouse)	0.226986	7.72396	4.89485	1.33048e-05	0.00024593	2.94044
0edV_TAo3czXINUr8o	CARD16	caspase recruitment domain family, member 16	0.226549	7.70311	7.00185	1.066e-08	1.14404e-06	9.84133
HlFF8ErtMjsn_q0rlE	NA	NA	0.225859	7.65229	4.56794	3.87991e-05	0.000534256	1.91295
ZkrzZCO3yLKvCvdLhE	HNRNPH3	heterogeneous nuclear ribonucleoprotein H3 (2H9)	0.225713	8.28078	3.47391	0.00115403	0.00683923	-1.30586
0F8Fl88lI_7XU0efV4	TUBA1C	tubulin, alpha 1c	0.22499	10.4095	2.96158	0.0048935	0.0207903	-2.64573
x65aXRiHVTIIUQiv00	NAIP	NLR family, apoptosis inhibitory protein	0.22471	7.67731	5.27472	3.75716e-06	9.62833e-05	4.15878
ctNSQ4iDXl3shQTUu4	MYOF	myoferlin	0.224679	7.67244	6.06995	2.54773e-07	1.21263e-05	6.76209
xnl116e._5e.gnHnl0	GNPDA1	glucosamine-6-phosphate deaminase 1	0.224653	8.47181	4.32701	8.42295e-05	0.000933599	1.17158
BSwYp.47vieiuLoWqk	TRAFD1	TRAF-type zinc finger domain containing 1	0.223547	8.07233	3.59364	0.000810792	0.00517201	-0.97481
c5_Sze.d9cp0L64VCU	NA	NA	0.222967	7.72826	7.02982	9.69396e-09	1.10749e-06	9.93354
ElrogpXmo5QnoQpUj0	HSPA6	heat shock 70kDa protein 6 (HSP70B')	0.22213	8.3078	2.952	0.00502191	0.0211834	-2.66949
olIMw7kpDbo7d4QLu0	DEK	DEK oncogene	0.2221	8.42181	2.60706	0.012378	0.0421681	-3.48902
fNrt557tVK37urpEjc	MKNK1	MAP kinase interacting serine/threonine kinase 1	0.222059	8.60627	4.85242	1.53037e-05	0.00027154	2.80584
xV6RCA9S07gkB5X_10	FNDC3B	fibronectin type III domain containing 3B	0.222001	8.25419	3.39873	0.00143639	0.00807477	-1.51049
NVJ7oUeXgK.sSOTlEs	ZNF207	zinc finger protein 207	0.221847	8.25251	5.42333	2.28038e-06	6.49211e-05	4.64092
fjgzeiF2El5XKV6urQ	CEACAM3	carcinoembryonic antigen-related cell adhesion molecule 3	0.221829	7.8771	4.47547	5.23216e-05	0.000660378	1.62665
KUoHei9NIvOuWD7f64	BIRC2	baculoviral IAP repeat containing 2	0.22161	8.07016	3.9218	0.000300294	0.00243715	-0.0375993
NE01SK670u0hd8OpS4	DNAJA1	DnaJ (Hsp40) homolog, subfamily A, member 1	0.221605	8.89438	2.78581	0.00781451	0.0296316	-3.0732
WSJ6T_RARpBHq6TULc	C15orf24	chromosome 15 open reading frame 24	0.221122	9.11967	4.71008	2.44204e-05	0.000377838	2.35692
35JI0WlGmt1inNxq.8	NDUFA12	NADH dehydrogenase (ubiquinone) 1 alpha subcomplex, 12	0.220872	8.80395	2.90429	0.0057095	0.0233659	-2.78701
ig44vX0UokChqjbugU	NA	NA	0.22048	8.09927	4.79512	1.8479e-05	0.000311644	2.62464
HHUKlAnQOVFMgYe1OE	CASP4	caspase 4, apoptosis-related cysteine peptidase	0.219932	9.55298	2.75147	0.00854742	0.0317711	-3.1546
05J7B50ZQDp46op558	C22orf28	chromosome 22 open reading frame 28	0.219887	7.75634	6.83872	1.85609e-08	1.6684e-06	9.30303
3Hll195Z1655_7nb_s	NA	NA	0.219849	9.6972	3.50748	0.00104584	0.00634454	-1.21366
NjuS6jJK0vjfeSgrkk	NA	NA	0.219812	10.9533	2.90709	0.00566677	0.0232479	-2.78014
iV9ewhjuHkQiR5Lv.Q	PPP2CA	protein phosphatase 2, catalytic subunit, alpha isozyme	0.21967	10.0838	4.16012	0.000142949	0.00139468	0.667327
T8VSWtQXjXu1T7CiCg	ITGB1	integrin, beta 1 (fibronectin receptor, beta polypeptide, antigen CD29 includes MDF2, MSK12)	0.219419	8.22786	3.40665	0.00140377	0.00792917	-1.48904
WSXeo6PHo_8AEnqkWk	CTSC	cathepsin C	0.219107	8.54965	3.40307	0.00141844	0.00798911	-1.49875
QovQuig56f4ldxHnr4	KLHDC8B	kelch domain containing 8B	0.218682	7.89121	3.36505	0.0015832	0.00871745	-1.60131
xXcolO813tVTItCXLk	MR1	major histocompatibility complex, class I-related	0.217346	7.82944	8.04453	3.18859e-10	8.30347e-08	13.2469
flNOuHtOvcSA5XU7tU	SCAMP1	secretory carrier membrane protein 1	0.216841	8.03715	4.48964	4.99847e-05	0.000642795	1.67038
En_ZM0p8oe6inwvkjk	PIGY	phosphatidylinositol glycan anchor biosynthesis, class Y	0.215914	8.83315	3.15318	0.00288911	0.0138646	-2.16018
Nb_wOsga6ce4uqJIFk	TBK1	TANK-binding kinase 1	0.21554	8.02362	5.07312	7.3678e-06	0.000157953	3.50937
xJ6CCltTXt36mhLsf0	C5orf15	chromosome 5 open reading frame 15	0.21533	8.49724	3.83129	0.000396329	0.00298139	-0.300193
WpAEZVTeeX.c_V5BtU	RING1	ring finger protein 1	0.214949	9.07345	4.16732	0.000139742	0.00137323	0.688924
NZT8Vw.CBJqh4V1uWI	CUL1	cullin 1	0.214801	8.04863	6.92085	1.40375e-08	1.3965e-06	9.57415
iUKEXUWDHSK0oVLigU	CD33	CD33 molecule	0.214709	8.28697	2.93223	0.00529679	0.0220695	-2.71833
HR0Ih8yURBQ3efSHeo	NFIL3	nuclear factor, interleukin 3 regulated	0.21468	8.50287	2.99941	0.00441587	0.0191611	-2.55143
H4vv_iwzVEHqsoJ0oc	CNOT8	CCR4-NOT transcription complex, subunit 8	0.214001	8.47898	3.97041	0.000258452	0.00218456	0.104623
lHaEP3q64eLFX8uLFU	SLC35A1	solute carrier family 35 (CMP-sialic acid transporter), member A1	0.213401	8.08485	3.44126	0.00126943	0.00735571	-1.39503
3oz7S38qvqejlisAvc	TYMS	thymidylate synthetase	0.212781	7.68792	4.42888	6.07858e-05	0.000740299	1.48323
NoPSfuESMTVHJ_4roE	CEPT1	choline/ethanolamine phosphotransferase 1	0.212218	7.95848	5.26923	3.82697e-06	9.75079e-05	4.14101
3HlR305eUB_qQ_OcDo	TICAM2	toll-like receptor adaptor molecule 2	0.211898	7.80063	5.86617	5.09543e-07	2.08383e-05	6.09056
0N_dK6StSaAuN5NVAI	AKR1A1	aldo-keto reductase family 1, member A1 (aldehyde reductase)	0.211574	8.45369	3.76839	0.000479891	0.00344463	-0.480914
6meDRU3r_ici_fXriI	MAD2L1BP	MAD2L1 binding protein	0.211137	8.00714	5.49911	1.76635e-06	5.26289e-05	4.88775
fHtf9NU75ZwuM.TO7o	MAT2B	methionine adenosyltransferase II, beta	0.210958	10.0275	2.59145	0.0128751	0.0434353	-3.5244
BeXOhvt.V8Tl5cR8FI	ATP8B4	ATPase, class I, type 8B, member 4	0.210924	7.84021	6.04744	2.75064e-07	1.292e-05	6.68782
fuCaSeKIdaZ2U6WGAI	SUMO2	SMT3 suppressor of mif two 3 homolog 2 (S. cerevisiae)	0.210847	9.44353	3.01021	0.00428777	0.0187615	-2.52437
6F0lTeakiCty.tQRTw	NBPF11	neuroblastoma breakpoint family, member 11	0.210692	9.22515	3.37117	0.00155553	0.0086046	-1.58486
ZOoheueEudPlelux9c	TYROBP	TYRO protein tyrosine kinase binding protein	0.210685	12.7847	2.58294	0.0131537	0.0441148	-3.54362
E5JUac65fXh3SzXYWM	PSMB2	proteasome (prosome, macropain) subunit, beta type, 2	0.210679	8.60894	3.84301	0.000382397	0.00290661	-0.266359
KHd4KLUUcuJIuUo4SU	NA	NA	0.210529	9.24814	2.61866	0.0120203	0.041251	-3.46265
3e78KW7T0IlK62aoQE	CSTB	cystatin B (stefin B)	0.210401	10.0277	2.57429	0.0134425	0.044808	-3.5631
E0LNfvhGlOFH9VupTo	HMOX1	heme oxygenase (decycling) 1	0.210068	7.99138	4.01094	0.000227931	0.00198632	0.223845
xXJUTj_HSI93.tRIS0	CLEC7A	C-type lectin domain family 7, member A	0.20973	7.83949	4.39767	6.7192e-05	0.000794813	1.38744
Q5Qolv95e0AUTSN354	UGP2	UDP-glucose pyrophosphorylase 2	0.209674	8.85816	3.65053	0.000684336	0.00452849	-0.815383
xZHfxp9rpwp15_eR3w	HIST1H4H	histone cluster 1, H4h	0.208912	7.71173	4.44193	5.82887e-05	0.000718286	1.52334
HI7XSGoK.iCrSOspqU	CCDC97	coiled-coil domain containing 97	0.208852	8.31563	4.30395	9.06533e-05	0.00098787	1.10142
rfgpce01ECdf.xqTVM	SP110	SP110 nuclear body protein	0.208396	8.29077	3.01962	0.00417901	0.0184222	-2.50074
HSldNFdIVdcJL1dPnc	BATF2	basic leucine zipper transcription factor, ATF-like 2	0.207718	7.52432	6.3047	1.14494e-07	6.53901e-06	7.53757
WhXUieoBcUQjcC96e0	CLDND1	claudin domain containing 1	0.207399	8.33632	3.31637	0.00182088	0.00972378	-1.73166
TwlKEILkDl3_CQ9Kco	NHLRC3	NHL repeat containing 3	0.207164	7.73784	6.92297	1.39367e-08	1.3943e-06	9.58115
fEe0fhQx4V38XZUZoQ	RAC1	ras-related C3 botulinum toxin substrate 1 (rho family, small GTP binding protein Rac1)	0.206874	9.57973	3.3364	0.00171923	0.00931015	-1.67816
EpFEkeqdF36_Nd_x6g	TOM1	target of myb1 (chicken)	0.20656	9.08668	2.53976	0.0146539	0.0478677	-3.6404
9SeHSqLEN15QsMgUBU	AZI2	5-azacytidine induced 2	0.206277	7.73899	6.91334	1.44005e-08	1.4246e-06	9.54937
065_uLfr3ArFAQoJQI	KLF4	Kruppel-like factor 4 (gut)	0.206273	7.79356	4.04418	0.000205538	0.00183636	0.322029
fp9BC6XLDRd19QXS4U	SH3GLB1	SH3-domain GRB2-like endophilin B1	0.206032	9.06485	3.58056	0.000842892	0.00533069	-1.01128
EH4kIeMUXm7V9dVi0o	GUSB	glucuronidase, beta	0.205549	8.3389	4.40349	6.59489e-05	0.000783774	1.40529
EOuluuU1iD_SJE.lxw	CMAS	cytidine monophosphate N-acetylneuraminic acid synthetase	0.205456	7.78691	6.81613	2.00435e-08	1.77465e-06	9.22843
Wvnn08vrqIKhE1Hfoo	RAB9A	RAB9A, member RAS oncogene family	0.205389	8.24809	6.3724	9.08983e-08	5.60845e-06	7.7614
on1f9Xe6S8Y.4fS14g	OSBPL9	oxysterol binding protein-like 9	0.205358	8.21044	6.41686	7.81157e-08	5.04844e-06	7.90841
ZpdcRcXd3qfc.YWY44	FTL	ferritin, light polypeptide	0.205003	13.815	2.5961	0.0127253	0.0431273	-3.51389
cTUoHil4FP_T9VddSU	TTYH3	tweety homolog 3 (Drosophila)	0.204788	7.85186	5.13193	6.05674e-06	0.000136628	3.69821
6zEfenRKAu3ksqhUi0	RHOC	ras homolog gene family, member C	0.204763	8.91204	2.75664	0.00843311	0.0314188	-3.14239
0V.iL1ELrLIuvwbf10	TOR1AIP1	torsin A interacting protein 1	0.204613	8.81233	3.54371	0.000940002	0.0058366	-1.11363
6pL9BKueekE4Ck46j0	SRP54	signal recognition particle 54kDa	0.204439	8.53762	5.07383	7.35034e-06	0.000157769	3.51165
TnoszXhUhcYT4I.klo	SMPDL3A	sphingomyelin phosphodiesterase, acid-like 3A	0.204258	7.73132	5.26872	3.83353e-06	9.75348e-05	4.13936
NnlE7Sl85wq4sPU65E	TLR4	toll-like receptor 4	0.204	8.16442	4.49869	4.85451e-05	0.000629309	1.69835
lkbhEJ4XQidRv_n2JA	RHOT1	ras homolog gene family, member T1	0.203915	7.96254	6.34952	9.82717e-08	5.85924e-06	7.68575
fuxTCUEFnh1KPkwlV4	ASH2L	ash2 (absent, small, or homeotic)-like (Drosophila)	0.203909	8.47679	4.43385	5.98233e-05	0.000732102	1.49849
HXl0t5.dx7ejw8pJec	DCK	deoxycytidine kinase	0.203764	8.12512	3.85126	0.000372874	0.00285221	-0.242512
oXed_glbkhVEMCDCTo	ANKRD22	ankyrin repeat domain 22	0.203755	7.60284	3.15124	0.00290479	0.0139059	-2.16518
lJqkeKFGedbuDA5Uuk	NA	NA	0.203532	9.41211	2.63842	0.0114324	0.0398141	-3.41751
Ql8Lf5_HR6jIeKf6u4	PAPD4	PAP associated domain containing 4	0.203531	8.81849	3.70961	0.000573152	0.00395842	-0.648417
6BVx9xJ77TR4tJHRek	RAB24	RAB24, member RAS oncogene family	0.203447	9.17663	3.20243	0.00251642	0.0124471	-2.03226
ZhRH_ofqJ6p4L53sVM	GADD45B	growth arrest and DNA-damage-inducible, beta	0.203416	8.12024	4.14669	0.000149118	0.00143979	0.627117
igooh6hKIBZcAuzSrc	PSMD6	proteasome (prosome, macropain) 26S subunit, non-ATPase, 6	0.20295	8.11457	5.02733	8.57923e-06	0.000177478	3.36274
HK.zqKe5PnQCe_oGX0	UBE2J1	ubiquitin-conjugating enzyme E2, J1, U	0.202793	8.44771	3.2419	0.00225101	0.0114536	-1.92884
HVQLQkIhy_CoveqUp0	CD53	CD53 molecule	0.202714	9.83894	3.78118	0.000461628	0.00335321	-0.444284
Zm6nY9dKlG8USF7_.c	SNRPB	small nuclear ribonucleoprotein polypeptides B and B1	0.202588	9.32072	3.32897	0.0017563	0.0094703	-1.69803
xQkV1dytSoc0SCCSk4	FAM111A	family with sequence similarity 111, member A	0.201858	7.95346	5.61035	1.21301e-06	3.99998e-05	5.25112
BX7XiiR.UpMvEn1Uew	PROSC	proline synthetase co-transcribed homolog (bacterial)	0.201813	8.55273	4.8617	1.48427e-05	0.000266567	2.83524
ZhXwAhHt0Huu8kUlJ0	BTG1	B-cell translocation gene 1, anti-proliferative	0.201628	11.9847	3.14587	0.0029487	0.0140781	-2.17906
ZroYe7xJfp5nLJ5f04	SAMD3	sterile alpha motif domain containing 3	0.201339	8.2686	3.16146	0.00282305	0.0136251	-2.13877
0SXouANerHh.iKLi7k	OBFC2A	oligonucleotide/oligosaccharide-binding fold containing 2A	0.201028	8.73052	3.65893	0.000667348	0.00444263	-0.791726
fV6AnVYQXUeU8VHKQs	NA	NA	0.200924	7.66043	5.32113	3.21545e-06	8.48573e-05	4.30906
lVu.XoWYNLu_pNLv94	C20orf24	chromosome 20 open reading frame 24	0.200852	10.986	3.00597	0.00433765	0.0189143	-2.535
Z_T7KX6gJ1LH75XJNI	NA	NA	0.200836	7.7018	5.30224	3.4259e-06	8.97424e-05	4.24786
EVeQqyLSuItX64tP7E	LYRM1	LYR motif containing 1	0.200752	8.51728	4.55915	3.99211e-05	0.00054489	1.88564
xkcLXk9e8CUfq0wgqI	SON	SON DNA binding protein	0.19982	9.15938	2.88419	0.00602468	0.0242852	-2.83614
uueT7eC8kXfoeDb_3I	XPO1	exportin 1 (CRM1 homolog, yeast)	0.199772	8.42584	4.16584	0.000140396	0.00137604	0.684481
WxOHSTF565Ingj.oq0	CD38	CD38 molecule	0.199634	7.73153	3.96844	0.000260028	0.00219161	0.0988564
KeUFSdU8VIS01Ea5Ik	LGALS9B	lectin, galactoside-binding, soluble, 9B	0.199566	7.75322	3.9623	0.000265016	0.00222465	0.0808382
BdXlXor7fQnuh96j_Q	DUSP5	dual specificity phosphatase 5	0.199346	7.902	3.93859	0.000285152	0.00235078	0.0114228
cCBv0Uw4V1InqAXFEI	CLDND1	claudin domain containing 1	0.199337	8.21436	3.02248	0.00414645	0.0183151	-2.49355
llyeeU.eweVIKuEj94	CDC40	cell division cycle 40 homolog (S. cerevisiae)	0.199137	8.20182	4.97326	1.02651e-05	0.000204012	3.19
WrtO_jZ.uHvTe1_Euk	QDPR	quinoid dihydropteridine reductase	0.199081	7.85534	4.90644	1.2805e-05	0.000238937	2.97726
6VQofeoEor24T2icXg	PCK2	phosphoenolpyruvate carboxykinase 2 (mitochondrial)	0.198777	7.84605	6.24356	1.41022e-07	7.62209e-06	7.33547
ZjpTCmu9ukaueHphxo	NA	NA	0.198675	7.78828	4.21389	0.000120645	0.00122851	0.828881
Zzl1f_74R7J0x6ALY0	DHX15	DEAH (Asp-Glu-Ala-His) box polypeptide 15	0.19847	9.16922	3.29252	0.00194935	0.0102705	-1.79512
EirpVXgvs0t46Be_os	41334	membrane-associated ring finger (C3HC4) 1	0.19769	7.73063	6.09635	2.32868e-07	1.13912e-05	6.84922
3jtH4VT87sokcRT6.U	SNX3	sorting nexin 3	0.197478	10.3047	3.32303	0.00178647	0.00959796	-1.7139
N8EYzSRPV_000K76dI	ARL5A	ADP-ribosylation factor-like 5A	0.197269	7.89313	3.49745	0.00107712	0.00648761	-1.24127
fUr.XrdIXOOH7V.jtE	CHMP2B	chromatin modifying protein 2B	0.197226	7.92098	6.36313	9.3817e-08	5.71514e-06	7.73075
cZTmn.pM5.o8_tQqks	PANK2	pantothenate kinase 2	0.196879	8.31992	4.32601	8.45e-05	0.000935788	1.16852
6vUivofs8rDAnoXqHY	BRD7	bromodomain containing 7	0.196335	8.0673	6.00453	3.18318e-07	1.43065e-05	6.5463
Bnp_L_xQBLX0H_R7l8	PQLC3	PQ loop repeat containing 3	0.196201	8.62178	2.96259	0.00488018	0.0207487	-2.64323
Eq6rH3UwpN0tA1U0e0	YARS	tyrosyl-tRNA synthetase	0.196097	8.45766	3.59941	0.000797003	0.00511352	-0.958694
iRIULUJW98bZTApVYE	ACVR1B	activin A receptor, type IB	0.196067	7.85641	5.20403	4.76056e-06	0.000114228	3.9304
fUR_ReNCJLn3U.v_SI	WAC	WW domain containing adaptor with coiled-coil	0.195996	8.65791	5.54713	1.50202e-06	4.74114e-05	5.04445
WB7qFX0j1eKzp_tHdI	ASPRV1	aspartic peptidase, retroviral-like 1	0.195802	7.73304	4.11036	0.000167133	0.00156841	0.518609
xoM45wqvHqihSb95kI	SQRDL	sulfide quinone reductase-like (yeast)	0.19555	7.97308	4.38658	6.96227e-05	0.000816477	1.35348
cQKpNoguSee5eO6gSc	MT1E	metallothionein 1E	0.19519	7.74862	4.68365	2.6623e-05	0.000403256	2.27405
3XrQuenee1_X1P1XeQ	ANG	angiogenin, ribonuclease, RNase A family, 5	0.195165	7.84577	5.91937	4.25265e-07	1.82339e-05	6.26568
ontXUcSAXRIESQKMLk	NA	NA	0.194708	7.97816	4.56422	3.92701e-05	0.000539484	1.90139
rJ9G667ku4pJ1_n9es	SETD3	SET domain containing 3	0.194655	8.52151	4.2264	0.000115961	0.00118833	0.866618
6hUhVEJToh0oVSCk6A	LILRB4	leukocyte immunoglobulin-like receptor, subfamily B (with TM and ITIM domains), member 4	0.194626	7.68704	6.2479	1.38953e-07	7.54779e-06	7.3498
EqRmeR1sHQTpOX93Ww	CYFIP1	cytoplasmic FMR1 interacting protein 1	0.194523	7.68952	6.69628	3.01419e-08	2.43723e-06	8.83243
fP15JX0nrpS6B7En6I	GART	phosphoribosylglycinamide formyltransferase, phosphoribosylglycinamide synthetase, phosphoribosylaminoimidazole synthetase	0.194289	8.02174	6.51045	5.67767e-08	4.00558e-06	8.21796
N5ieS0l9G3pdLVbtLk	OSBPL5	oxysterol binding protein-like 5	0.194028	7.68576	4.74852	2.15323e-05	0.000344439	2.47776
ES_eIJeExSh5eIQlEI	NA	NA	0.194016	7.73448	6.84927	1.79064e-08	1.6329e-06	9.33787
cNEhRi5f1aF6G_XUiQ	OAF	OAF homolog (Drosophila)	0.193899	7.81735	5.17228	5.29351e-06	0.000122854	3.82806
cSP6RcdeVRIkRRgEe0	EIF2A	eukaryotic translation initiation factor 2A, 65kDa	0.19331	7.7985	4.54518	4.17688e-05	0.000564182	1.8423
ceSfbLHV9axcfEX1OQ	PSMG2	proteasome (prosome, macropain) assembly chaperone 2	0.192917	8.92047	4.76964	2.00914e-05	0.00032867	2.54428
TQnk7XhXf4PC6Huk4Q	SNX2	sorting nexin 2	0.19275	8.28659	3.55756	0.000902285	0.00564183	-1.07521
lV0v1UeoT7ueQJT6_o	TBC1D2	TBC1 domain family, member 2	0.192305	7.88363	4.66504	2.82905e-05	0.000418847	2.21577
3Uqb_h1LHQhKdMmeAk	BRD7	bromodomain containing 7	0.192114	8.01436	6.68364	3.14686e-08	2.49892e-06	8.79062
K6DSNcJTISnD5UUdUo	THOC7	THO complex 7 homolog (Drosophila)	0.191949	8.62431	3.60791	0.000777109	0.00501678	-0.934939
iVKmfE0AgaKYksYSQY	GNL2	guanine nucleotide binding protein-like 2 (nucleolar)	0.191285	7.96812	5.50684	1.72088e-06	5.19137e-05	4.91296
6k.SOe_h9O1UFyfrio	ZNF207	zinc finger protein 207	0.191203	8.73977	3.63368	0.000719653	0.00472161	-0.862722
3DPr4OXOztKV7niU4o	PPCS	phosphopantothenoylcysteine synthetase	0.190884	8.34092	4.76551	2.03653e-05	0.000331765	2.53127
QT2uE93VOEVIKpIIFE	NA	NA	0.190596	8.80343	2.96051	0.00490769	0.0208356	-2.64839
iROlXjptXnr.Q93gl8	SLC24A4	solute carrier family 24 (sodium/potassium/calcium exchanger), member 4	0.190555	7.74521	5.28649	3.61183e-06	9.32337e-05	4.19685
BtNCJZ5R611vx4Xp7s	LRRC33	leucine rich repeat containing 33	0.190087	8.17161	3.5677	0.000875629	0.00549651	-1.04706
WVRHH3df0pXHiErjqA	SRSF9	serine/arginine-rich splicing factor 9	0.189446	9.6102	4.74534	2.17576e-05	0.000347416	2.46776
03dSL5OyMk.P3uV8BU	CLIC4	chloride intracellular channel 4	0.189434	7.82618	4.08959	0.000178365	0.00165192	0.45677
uVSKiL_7U6u83eOkHU	MDH1	malate dehydrogenase 1, NAD (soluble)	0.189333	8.80578	3.11624	0.00320222	0.0150251	-2.25531
uaEuOnfoDq6OkSHMpE	ASGR2	asialoglycoprotein receptor 2	0.188437	7.81691	3.29915	0.00191279	0.0101128	-1.7775
fXpQnkoVPd3MWeURTQ	SDHB	succinate dehydrogenase complex, subunit B, iron sulfur (Ip)	0.188226	9.35481	3.68494	0.000617284	0.00418968	-0.718305
HULo956KPNoJq5IG0c	CECR1	cat eye syndrome chromosome region, candidate 1	0.187997	7.63955	7.4497	2.34047e-09	3.83751e-07	11.313
lbhxZeZRduX9.NxJp8	UNC93B1	unc-93 homolog B1 (C. elegans)	0.187168	7.82956	4.64799	2.99085e-05	0.000436981	2.16242
KpCYUm43RIkQFdLdQU	CEACAM1	carcinoembryonic antigen-related cell adhesion molecule 1 (biliary glycoprotein)	0.187009	7.70833	3.76966	0.000478048	0.00343754	-0.477281
KBSq.yd73edU19nRSc	CREB3L2	cAMP responsive element binding protein 3-like 2	0.186346	8.08376	5.56786	1.40041e-06	4.47533e-05	5.11219
WSJVRo.eRHere566BM	COMMD7	COMM domain containing 7	0.18604	8.95375	3.78436	0.000457194	0.00333031	-0.435172
rXUIvGLwoIuUVfilXg	RIPK3	receptor-interacting serine-threonine kinase 3	0.186027	7.82402	7.55804	1.62472e-09	2.93577e-07	11.6673
WYnirz6nh.PhU03r_k	MMADHC	methylmalonic aciduria (cobalamin deficiency) cblD type, with homocystinuria	0.185981	8.86291	4.64801	2.99066e-05	0.000436981	2.16248
fIe38XQz8R154fhQgA	CES1	carboxylesterase 1	0.185977	7.5826	4.76985	2.00779e-05	0.00032867	2.54492
lKW7SRjoVQEhRXXu34	NA	NA	0.185962	7.74031	7.06264	8.6722e-09	1.00371e-06	10.0417
lnd5da0d_e65xuguDo	PSMD7	proteasome (prosome, macropain) 26S subunit, non-ATPase, 7	0.185524	8.56158	3.67755	0.00063113	0.00426079	-0.739195
ciIjCU2Vf5d4g_nnv0	RALB	v-ral simian leukemia viral oncogene homolog B (ras related; GTP binding protein)	0.18545	10.1164	3.36098	0.00160191	0.00880403	-1.61227
NateJLikjswwyld_gQ	SNRPA1	small nuclear ribonucleoprotein polypeptide A'	0.185373	8.62247	4.36797	7.38986e-05	0.000848636	1.29654
BiJI_e9VkOODqRr_lg	DYNC1I2	dynein, cytoplasmic 1, intermediate chain 2	0.185316	8.02701	5.61597	1.1902e-06	3.95422e-05	5.26948
cXifOcArqOHSJ6p60U	TRIM25	tripartite motif containing 25	0.185068	8.36969	2.7031	0.00968807	0.0350401	-3.26807
3F3V.qj8O3rnll4v0I	DNAJB11	DnaJ (Hsp40) homolog, subfamily B, member 11	0.18483	8.50498	3.96875	0.000259783	0.00219161	0.0997517
BieNPnX3RdeU4x7S8U	TMEM59	transmembrane protein 59	0.184547	9.21971	3.27328	0.00205921	0.0107028	-1.8461
BriVFLijx47oS_Oq.s	SELS	selenoprotein S	0.184235	8.46762	3.785	0.000456305	0.00332658	-0.433335
0W6nuULuVKju.kCoTc	NA	NA	0.18415	7.53717	5.7616	7.26695e-07	2.76738e-05	5.74686
ETS.78dNdSgeStC_0o	PTGER2	prostaglandin E receptor 2 (subtype EP2), 53kDa	0.184064	8.11608	3.93012	0.000292694	0.00239511	-0.0133148
K9_EHedf6p6cceSt1I	FCGR1B	Fc fragment of IgG, high affinity Ib, receptor (CD64)	0.1837	7.66903	5.2142	4.60133e-06	0.00011177	3.96322
rLu7XeK5_IC7EeSB5U	FEZ2	fasciculation and elongation protein zeta 2 (zygin II)	0.183458	8.40466	2.91555	0.00553972	0.0228862	-2.75939
HIOKHmCiBkkJUpproA	NA	NA	0.183339	8.42551	4.22137	0.000117822	0.00120531	0.851445
NXSh_QAat0k5fVIlOI	ARSD	arylsulfatase D	0.183226	7.67006	5.12436	6.21172e-06	0.000138885	3.67385
ogf9RSSoFUIk1DIJ7k	LMNB1	lamin B1	0.182617	7.85213	5.09091	6.94399e-06	0.00015099	3.56645
9up90pKKE36S56fpTw	SIL1	SIL1 homolog, endoplasmic reticulum chaperone (S. cerevisiae)	0.182573	7.7142	6.79824	2.13013e-08	1.85815e-06	9.16936
Tv166Elqw5.yedk5_0	RGL1	ral guanine nucleotide dissociation stimulator-like 1	0.182364	7.59577	6.75371	2.47882e-08	2.10023e-06	9.02222
WvHo8nV117uOsU5Mi0	NA	NA	0.181907	8.0054	3.80579	0.000428365	0.0031593	-0.373654
KEcvnH6gwKn.4qqzow	FAM8A1	family with sequence similarity 8, member A1	0.181678	8.18609	2.88962	0.00593801	0.0240343	-2.82289
fnXrfiO33bwosqX.oo	TFRC	transferrin receptor (p90, CD71)	0.181639	7.98769	5.2416	4.19809e-06	0.000103827	4.0517
6.U5SL_7qamTuRRIuQ	SEC11A	SEC11 homolog A (S. cerevisiae)	0.181486	8.42861	4.03404	0.00021213	0.00188479	0.292052
xWbMn3pep_l6PvoYvc	MGST3	microsomal glutathione S-transferase 3	0.180821	8.5383	2.85859	0.00644954	0.02555	-2.89836
lekrQ59WhGjR.7ePUk	MCM7	minichromosome maintenance complex component 7	0.180809	8.75629	2.80538	0.00742334	0.0284837	-3.0265
E1xFxd3ep9z9hZjjuk	FTL	ferritin, light polypeptide	0.18076	13.796	2.54302	0.0145352	0.0475381	-3.63312
H11VOByAFHx1SD0rbk	TIMM23	translocase of inner mitochondrial membrane 23 homolog (yeast)	0.180719	8.64182	4.48438	5.08402e-05	0.000649544	1.65414
rST4glD0UqFI557xaU	COPB1	coatomer protein complex, subunit beta 1	0.180469	8.5273	3.47129	0.00116291	0.00686825	-1.31303
9rkl7j3jqh6wN7l3l0	THAP11	THAP domain containing 11	0.180378	8.84371	4.30675	8.98495e-05	0.000982133	1.10992
cp60Tegk_9JKPBeOlw	SP140	SP140 nuclear body protein	0.180332	7.61074	6.79598	2.14661e-08	1.86334e-06	9.16188
0uB0lCRLrpKlwecQKI	NA	NA	0.180049	10.2564	2.90483	0.00570131	0.0233485	-2.7857
9tFX0HokoaCvt7H6io	ACP2	acid phosphatase 2, lysosomal	0.17995	7.63955	5.85456	5.30043e-07	2.14783e-05	6.05237
cqCHolwnl5x6n8TrhI	ILF2	interleukin enhancer binding factor 2, 45kDa	0.179909	8.75814	4.2776	9.85814e-05	0.00105288	1.02143
KgkxUqCCe_WjhVziAk	GSTO1	glutathione S-transferase omega 1	0.179696	8.93226	2.95203	0.00502144	0.0211834	-2.6694
ZRVIK937MXnS0vX9HU	GALC	galactosylceramidase	0.179531	8.14326	4.89005	1.35173e-05	0.000248819	2.92519
Hug7QeoTWkrpTYv44E	FERMT3	fermitin family member 3	0.179483	8.38559	3.00275	0.00437582	0.0190292	-2.54306
ZgrvgnZukSpMKiigsI	EXOC1	exocyst complex component 1	0.178756	7.83236	6.43896	7.2445e-08	4.79887e-06	7.98152
9KO_S6XCiSX.ogqvU8	UBA3	ubiquitin-like modifier activating enzyme 3	0.17849	7.90933	5.14211	5.8546e-06	0.000132736	3.73093
oMNeeFSIuHSeHDoe1U	RWDD1	RWD domain containing 1	0.178383	8.11797	2.70002	0.00976507	0.0352179	-3.27523
c1_Oet3kRM5_vH5OT0	DSE	dermatan sulfate epimerase	0.178137	7.89067	4.59026	3.60872e-05	0.000507169	1.98238
3YeUqXyHUTtT.70rMk	RNF34	ring finger protein 34	0.178107	8.69476	4.98435	9.89448e-06	0.000198203	3.2254
0pxdKtFFTs_p8tKPhI	CMTM6	CKLF-like MARVEL transmembrane domain containing 6	0.177748	9.43501	2.84037	0.00676882	0.0264947	-2.94243
BeIF.VvHm.0UXt9VOc	TMEM131	transmembrane protein 131	0.177167	8.90175	2.52027	0.0153805	0.0495648	-3.68368
i46Ncq99NE6us6Sh9I	NA	NA	0.177021	8.70452	4.35547	7.69136e-05	0.000873068	1.25834
NggnpfYTpxQ55e5N3U	OSTF1	osteoclast stimulating factor 1	0.176739	10.1408	3.34355	0.00168428	0.00915447	-1.65902
3PgKIkGqeKW7SRjoVQ	FCAR	Fc fragment of IgA, receptor for	0.176737	7.79311	7.52814	1.79677e-09	3.18172e-07	11.5696
WVI_nU6AKKBJv1sA_E	TARS	threonyl-tRNA synthetase	0.176642	7.83847	5.16392	5.44349e-06	0.000125512	3.80113
xjSAJICIi6WjqniqIA	ACOT9	acyl-CoA thioesterase 9	0.176494	7.75603	4.7936	1.85715e-05	0.000312906	2.61984
6UPSjPleU1OAHvekUA	G3BP2	GTPase activating protein (SH3 domain) binding protein 2	0.176297	8.70874	3.41308	0.00137784	0.00781513	-1.47163
ckt8SXD33_h61_kkvU	NA	NA	0.175495	8.36853	2.72576	0.00913722	0.0335063	-3.21509
3TT_J5fTHr9dJfX0l4	SDAD1	SDA1 domain containing 1	0.175461	8.53471	3.59495	0.000807644	0.00516604	-0.971155
lVNDNKJeJOLwJO6Ol4	LRRC37B	leucine rich repeat containing 37B	0.175278	8.10068	5.88752	4.73884e-07	1.98294e-05	6.16083
Bd6tDaCmc5Sh44j6bo	GARS	glycyl-tRNA synthetase	0.1746	8.5632	4.3682	7.38436e-05	0.000848554	1.29725
xIKtHlEEkS0mrg8SuU	PRKCH	protein kinase C, eta	0.174399	9.30072	2.85593	0.00649536	0.0256913	-2.90482
xuPF55OALk6qFe5N7k	NRIP1	nuclear receptor interacting protein 1	0.174126	7.81419	4.62082	3.26751e-05	0.000467754	2.07758
H_ohSMVA9lvlH8UVl4	PSMB6	proteasome (prosome, macropain) subunit, beta type, 6	0.174038	9.26217	3.26124	0.00213085	0.0110073	-1.87789
09Q5NXnjUg7RWooZKM	PSG3	pregnancy specific beta-1-glycoprotein 3	0.174018	8.05393	2.71897	0.00929915	0.0339385	-3.231
TnebutbOgJesleYvCw	STAU1	staufen, RNA binding protein, homolog 1 (Drosophila)	0.173845	9.09298	3.26389	0.00211492	0.0109506	-1.87091
xvUSnAlSOVFMgYkF_E	CASP5	caspase 5, apoptosis-related cysteine peptidase	0.173696	7.55374	4.3178	8.67407e-05	0.000953447	1.14353
i5OVK7e3eniv_3P8S4	PHACTR2	phosphatase and actin regulator 2	0.173392	7.8109	4.72001	2.36395e-05	0.000369144	2.38812
ZdI9eheu16_rUK4.xI	HIATL1	hippocampus abundant transcript-like 1	0.172989	7.96284	2.66484	0.0106876	0.0378133	-3.35677
QvhSDL6wd5SJex8XlA	ANGEL2	angel homolog 2 (Drosophila)	0.172717	8.32052	3.83384	0.000393263	0.00296462	-0.292851
6UigNhN1ExNiSJawUU	DDX39A	DEAD (Asp-Glu-Ala-Asp) box polypeptide 39A	0.172636	8.92262	3.59043	0.000818544	0.0052102	-0.983749
iuDEktS8N_ukn3_knU	CRLS1	cardiolipin synthase 1	0.172343	8.04427	3.61312	0.00076515	0.00495585	-0.920363
fclcj.osAVfSR_FgMU	HNRNPH3	heterogeneous nuclear ribonucleoprotein H3 (2H9)	0.171896	8.16002	3.43998	0.00127417	0.00737356	-1.39852
r_ul59XTlegxB0idSk	PPP3CB	protein phosphatase 3, catalytic subunit, beta isozyme	0.171459	8.26733	4.03846	0.000209229	0.0018637	0.305124
xue1DIBEElEDkpRI5A	41334	membrane-associated ring finger (C3HC4) 1	0.171421	7.75566	4.43723	5.91767e-05	0.000725693	1.50888
6qPyUIkSH6PX3tXVRc	IER5	immediate early response 5	0.171012	8.03386	3.87881	0.000342707	0.00267814	-0.162694
oglcQ0rkk9IhbYCaPU	DIAPH2	diaphanous homolog 2 (Drosophila)	0.170779	7.73841	6.71691	2.80968e-08	2.31413e-06	8.90062
0e5JLp3u7A5zkeKMRA	NA	NA	0.169776	10.295	2.63479	0.0115385	0.040079	-3.42583
W1J56DXFNUopKRJSog	LGALS9	lectin, galactoside-binding, soluble, 9	0.169621	7.58595	5.52717	1.60673e-06	4.97412e-05	4.9793
KlnOCAuvQSdaeilodA	GNG5	guanine nucleotide binding protein (G protein), gamma 5	0.16959	8.24616	3.30762	0.00186703	0.00991046	-1.75496
ZlEo0nhiHvl_6jeIDc	NA	NA	0.169432	8.46648	2.80118	0.00750575	0.0287066	-3.03655
il3dXoTG8kT6T0s_uk	ELMO2	engulfment and cell motility 2	0.169103	8.37265	3.6597	0.000665815	0.0044391	-0.789562
Q8SSUhjTknHE0f36AY	HIF1A	hypoxia inducible factor 1, alpha subunit (basic helix-loop-helix transcription factor)	0.168326	7.80992	4.9457	1.12462e-05	0.000217174	3.10215
9OkiuiiEeCYeSJSCos	DYNLRB1	dynein, light chain, roadblock-type 1	0.167985	9.11986	2.62353	0.011873	0.040893	-3.45156
ZqSpvyx7dV.FJAXh9E	C16orf61	chromosome 16 open reading frame 61	0.167742	7.94247	3.8524	0.000371581	0.00284477	-0.239225
TT5df9Sknc9_SJTJKE	NECAP1	NECAP endocytosis associated 1	0.167722	8.21934	4.56804	3.87865e-05	0.000534256	1.91326
9sHoB7vncFddSV5JdU	BST1	bone marrow stromal cell antigen 1	0.167565	7.82222	4.73627	2.2414e-05	0.000354382	2.43922
BnlSXq3rAoAsS.SpCA	SSB	Sjogren syndrome antigen B (autoantigen La)	0.167037	7.96757	4.40282	6.60919e-05	0.000784946	1.40322
TknXgre75HtFLdCc5c	GLIPR2	GLI pathogenesis-related 2	0.166877	10.9355	2.54817	0.01435	0.0470749	-3.62165
B10nshK1.2OsTP3_X8	CD69	CD69 molecule	0.166634	7.67424	3.29838	0.00191701	0.0101302	-1.77955
TjgZxYT8o93vjhfo54	MMADHC	methylmalonic aciduria (cobalamin deficiency) cblD type, with homocystinuria	0.166621	8.69544	3.18588	0.00263626	0.0129137	-2.07538
6XusudUt4XeyF9LHR0	NA	NA	0.166434	8.59094	4.11293	0.00016579	0.00156057	0.526286
9rq.lyobsHEp.xwlCg	SPTLC1	serine palmitoyltransferase, long chain base subunit 1	0.166229	8.35856	3.45986	0.00120242	0.00704816	-1.3443
c6eDqAlo_aK6OUu6xs	UQCRC1	ubiquinol-cytochrome c reductase core protein I	0.166007	8.53331	3.08723	0.00347027	0.0159905	-2.32953
91V_0SAUqHfSj_I6X4	COQ2	coenzyme Q2 homolog, prenyltransferase (yeast)	0.165857	7.7763	4.83205	1.63654e-05	0.000284693	2.74136
ESGzW6XfijNCgeIlbk	NUP205	nucleoporin 205kDa	0.165293	8.01023	5.02657	8.60109e-06	0.000177515	3.36028
Tk14qaIFIIY4p15AKw	LYAR	Ly1 antibody reactive homolog (mouse)	0.165053	7.95745	5.08796	7.01258e-06	0.00015218	3.55698
KokaNxRFPkz_EVfVSU	MGST1	microsomal glutathione S-transferase 1	0.164771	7.74545	4.47203	5.29044e-05	0.000664859	1.61605
Q_wieokBG.OLu2g1bk	GTPBP4	GTP binding protein 4	0.164447	8.36126	4.03091	0.000214208	0.0018966	0.282793
rXe5eL3V77dAmsVNdU	KCNMB1	potassium large conductance calcium-activated channel, subfamily M, beta member 1	0.164208	7.66775	6.43005	7.46811e-08	4.89797e-06	7.95203
T246aZaKaK97XSWS1c	MAD2L1BP	MAD2L1 binding protein	0.164119	7.96405	4.71878	2.37348e-05	0.000369745	2.38426
x3XVcjlOfX.t7xr5Ts	PDHB	pyruvate dehydrogenase (lipoamide) beta	0.16407	9.14979	3.33843	0.00170926	0.00926746	-1.67274
EuCFC1IHg1wgOSh5Ag	OAS3	2'-5'-oligoadenylate synthetase 3, 100kDa	0.164044	7.46739	5.66362	1.01291e-06	3.48963e-05	5.4255
QFL.xJderq234VAd_4	TMEM167B	transmembrane protein 167B	0.163811	8.20548	3.60048	0.000794487	0.00510108	-0.955723
ZQorqdUo6xT539cnBU	STK39	serine threonine kinase 39	0.163489	8.0115	4.31031	8.88347e-05	0.000972841	1.12076
lNFaERNOfCPQeokxSo	NOP58	NOP58 ribonucleoprotein homolog (yeast)	0.163465	7.98338	3.42771	0.0013205	0.00757234	-1.4319
cqX56cervL_S17ufV0	NEDD8	neural precursor cell expressed, developmentally down-regulated 8	0.163372	10.6833	3.10058	0.00334434	0.0155386	-2.29541
reEHuCUV6nEgFEt9Uk	ST3GAL5	ST3 beta-galactoside alpha-2,3-sialyltransferase 5	0.163366	8.02389	4.68331	2.66533e-05	0.000403256	2.27296
Wggeq_8ieI4exExV5U	POLR3GL	polymerase (RNA) III (DNA directed) polypeptide G (32kD)-like	0.163104	8.41531	3.76883	0.000479242	0.00344277	-0.479637
EfewX9d1aH4kFxEdE4	MED6	mediator complex subunit 6	0.162919	8.40538	4.28172	9.72993e-05	0.00104404	1.03392
6VAoUIjUX0g6E49Kic	PTPN12	protein tyrosine phosphatase, non-receptor type 12	0.16286	8.17723	3.46537	0.00118321	0.00695856	-1.32923
KkuP.NQ379QAU7dUqU	SP3	Sp3 transcription factor	0.162705	8.21276	2.59175	0.0128653	0.0434189	-3.52372
oks6Dr0onsLnZSAVIk	STXBP3	syntaxin binding protein 3	0.162201	7.98406	3.93677	0.000286757	0.00236071	0.00610314
Zmy0lfmdLsgFRt7Cto	PTTG1IP	pituitary tumor-transforming 1 interacting protein	0.162161	9.75767	3.6086	0.000775516	0.00501256	-0.93301
9p9edCEWPWcT1FQRFI	RBBP8	retinoblastoma binding protein 8	0.16187	7.58029	7.41915	2.59451e-09	4.17669e-07	11.213
iFSPriMoR_5JIzlDqU	DNASE1L1	deoxyribonuclease I-like 1	0.161656	8.00484	4.62887	3.18303e-05	0.000458253	2.1027
WnO4ouDi6X3jneHfd4	FNDC3B	fibronectin type III domain containing 3B	0.161579	8.2673	2.80428	0.00744483	0.0285229	-3.02913
ZumFCGP95fIkKj0V1k	LAG3	lymphocyte-activation gene 3	0.161566	7.70689	3.96302	0.000264424	0.00222231	0.0829605
r659W557456f71Q4Tk	ETFA	electron-transfer-flavoprotein, alpha polypeptide	0.161109	8.47487	3.17576	0.00271221	0.0131836	-2.10168
oLUKIIIpcl4lAiIsak	PSMB8	proteasome (prosome, macropain) subunit, beta type, 8 (large multifunctional peptidase 7)	0.160642	8.92717	2.66777	0.010608	0.0375674	-3.35003
BkTt5Qouv7Hnu.rE3I	KLHL12	kelch-like 12 (Drosophila)	0.160551	8.15761	5.06662	7.52878e-06	0.000160433	3.48854
H5FSfRwS6ngBNfq_Ls	GLUD1	glutamate dehydrogenase 1	0.160533	8.85371	3.55231	0.0009164	0.00571596	-1.08977
HUO0UfqfB6sP7rcpf8	PI4K2B	phosphatidylinositol 4-kinase type 2 beta	0.160354	7.69629	4.75296	2.12213e-05	0.000341313	2.49173
0SKi9EQosCXh6FPkaM	C2orf47	chromosome 2 open reading frame 47	0.160242	7.85269	6.6197	3.91261e-08	2.94827e-06	8.57926
NJX6nV93_MkvMOV_9U	CHMP4A	chromatin modifying protein 4A	0.160225	8.50693	3.78336	0.000458586	0.00333517	-0.438043
i0q31Trr0gyOJMkK.4	NA	NA	0.159774	7.82045	5.18069	5.1469e-06	0.000121009	3.85515
3qL.LbKXzjDxVmuu7I	MED28	mediator complex subunit 28	0.15952	8.27084	3.37157	0.00155371	0.00859783	-1.58377
BQkv9UU1PE1Kqj9faQ	TANK	TRAF family member-associated NFKB activator	0.159474	8.36324	3.86809	0.000354154	0.00274939	-0.193786
xRCe9.VLxANe72vsF4	THUMPD1	THUMP domain containing 1	0.159004	8.16215	3.04911	0.00385457	0.0173093	-2.42635
05GRvqiC2lfqN.d_LQ	DDA1	DET1 and DDB1 associated 1	0.158998	8.40581	4.2176	0.000119236	0.00121556	0.840079
HClLklAJJdNRQpNZ4I	CDC20	cell division cycle 20 homolog (S. cerevisiae)	0.158497	7.57518	3.16965	0.00275904	0.0133708	-2.11754
BjpCEsgkinlRqHsFbQ	IDH1	isocitrate dehydrogenase 1 (NADP+), soluble	0.158448	7.74227	6.86068	1.72244e-08	1.62239e-06	9.37556
BTvcUX6UfSQvT14qdU	GBA	glucosidase, beta, acid	0.158432	8.03639	3.51257	0.0010303	0.00627565	-1.19963
rOf4OHE1L3kXMV3rvk	METAP2	methionyl aminopeptidase 2	0.15839	7.9889	3.70946	0.000573396	0.00395856	-0.648817
cS97X4NWHIz9_V3rdI	DDX21	DEAD (Asp-Glu-Ala-Asp) box polypeptide 21	0.158346	8.31372	4.11267	0.000165926	0.00156057	0.525503
0KWCUmVJ.XR717oo7c	CORO1B	coronin, actin binding protein, 1B	0.157992	8.19886	4.514	4.62024e-05	0.000604574	1.7457
f_JnRXubpfucFPJHk0	RP2	retinitis pigmentosa 2 (X-linked recessive)	0.157899	7.77253	4.30055	9.1641e-05	0.000996181	1.09108
lks1Li4IEfh4d_pRd4	PROSER1	proline and serine rich 1	0.157894	7.81321	5.17182	5.30163e-06	0.000122881	3.82659
B1eogKZ4m6Tkrt.nu8	GTF2E2	general transcription factor IIE, polypeptide 2, beta 34kDa	0.15789	8.44349	3.96222	0.000265079	0.00222465	0.0806146
Z1USglULSWVnEx0esA	C17orf87	chromosome 17 open reading frame 87	0.1578	7.77904	4.02174	0.000220405	0.00194369	0.255716
fca0gCp5666CcwKU7o	DDX1	DEAD (Asp-Glu-Ala-Asp) box polypeptide 1	0.156737	8.32405	3.60967	0.000773044	0.00499966	-0.93001
cSOTuOOzqsxZfKk.qQ	C1GALT1C1	C1GALT1-specific chaperone 1	0.156701	7.87647	4.20657	0.000123466	0.00125148	0.806863
BX_f27hRO.3sUtHqgI	UBP1	upstream binding protein 1 (LBP-1a)	0.156508	8.27832	4.85489	1.51797e-05	0.000270697	2.81366
3TpLZ_gVHRFDUuFu7o	DYNLRB1	dynein, light chain, roadblock-type 1	0.156486	8.90844	2.70963	0.0095261	0.0345885	-3.25282
oFQt91bU9S0Dep0dFU	SRC	v-src sarcoma (Schmidt-Ruppin A-2) viral oncogene homolog (avian)	0.155902	7.70403	4.23462	0.000112984	0.00116321	0.891408
HdUm8EQDU6ks46Std4	ATF3	activating transcription factor 3	0.155802	7.56481	3.09984	0.00335125	0.0155514	-2.29732
ZJtEuhqAHlBfB_iEaE	CPSF3	cleavage and polyadenylation specific factor 3, 73kDa	0.15556	8.21839	3.91469	0.000306943	0.00247737	-0.0583449
uVJQSC5O1HualLu78Q	C12orf76	chromosome 12 open reading frame 76	0.155544	7.7804	4.92335	1.21089e-05	0.000229064	3.03103
i0NA17XLu5Lt9pXuhE	EHD4	EH-domain containing 4	0.155522	7.91513	4.27811	9.84213e-05	0.00105181	1.02298
WnSV9cql3lf47X4nHc	HDHD1	haloacid dehalogenase-like hydrolase domain containing 1	0.155362	7.69813	4.98956	9.72499e-06	0.000195916	3.24203
cj3ouCSO8dhf_3VKe4	MRPS30	mitochondrial ribosomal protein S30	0.15524	7.94347	5.93807	3.99067e-07	1.72358e-05	6.32727
xh763crJf63PsRDdP0	ACADM	acyl-CoA dehydrogenase, C-4 to C-12 straight chain	0.155186	7.91178	3.74898	0.000508939	0.00361216	-0.536371
rJd5BC0rrrTv1fcv_k	MED20	mediator complex subunit 20	0.154754	7.95273	5.61235	1.20483e-06	3.98043e-05	5.25766
TChtGpV3Ao9uudNVCc	LTBR	lymphotoxin beta receptor (TNFR superfamily, member 3)	0.154551	8.24225	2.67406	0.0104383	0.0371616	-3.33547
iiFGSdPjXjklE7iF0E	SIGLEC1	sialic acid binding Ig-like lectin 1, sialoadhesin	0.154509	7.46397	8.8044	2.61561e-11	1.07715e-08	15.6693
KWIca7nvIK9635HCK0	PRDX3	peroxiredoxin 3	0.154423	8.89282	2.89284	0.00588712	0.0239158	-2.81503
Wh36lF3vHx7HOgnXrg	PROSER1	proline and serine rich 1	0.154279	7.81632	5.57104	1.38543e-06	4.43638e-05	5.12258
uAA6n_REOr_ieHqBDo	DNAJA2	DnaJ (Hsp40) homolog, subfamily A, member 2	0.154065	8.59659	3.03223	0.00403723	0.0179401	-2.46898
fXN7ioOiRK5LyOe99c	PDCD6	programmed cell death 6	0.153799	9.17134	4.03423	0.000212005	0.00188463	0.29261
K769I_Kf_.ii.p9S1U	NDUFB5	NADH dehydrogenase (ubiquinone) 1 beta subcomplex, 5, 16kDa	0.153243	9.01348	2.96587	0.00483698	0.0205996	-2.63507
cdCev.e907C4eo57fM	CUL5	cullin 5	0.153125	7.8267	3.59944	0.000796936	0.00511352	-0.958615
WJLHpIFIDlnoJG0B50	SNX20	sorting nexin 20	0.1529	7.73178	4.20382	0.000124545	0.0012602	0.79857
lnLZMVosEXllNNDeeI	MTO1	mitochondrial translation optimization 1 homolog (S. cerevisiae)	0.152723	7.95427	5.4358	2.18658e-06	6.27551e-05	4.6815
6e5enz9HSTDuRavRU4	PARP3	poly (ADP-ribose) polymerase family, member 3	0.152642	7.71951	6.32062	1.08447e-07	6.27577e-06	7.59019
WYi619X_XuuwC5NESs	NA	NA	0.152618	8.64025	3.79098	0.000448095	0.00327887	-0.416189
cczegqmAJg4gomkpJU	CAPG	capping protein (actin filament), gelsolin-like	0.15257	7.76215	4.7002	2.52217e-05	0.000388032	2.32594
rs1P5F3j3ncan9XpHo	UNC50	unc-50 homolog (C. elegans)	0.151926	8.61221	4.47913	5.17076e-05	0.000656842	1.63795
3tEko.VQVJ1NNEhEiI	RASSF4	Ras association (RalGDS/AF-6) domain family member 4	0.151861	7.61412	5.75156	7.51876e-07	2.84492e-05	5.71389
KniigXqk.KkihAKO0k	DOK2	docking protein 2, 56kDa	0.151811	8.37203	3.00677	0.00432815	0.0188776	-2.53299
lWAVAobprdccU.UWzo	NA	NA	0.151428	7.99328	2.69968	0.00977362	0.0352313	-3.27602
0p77i30kV1TsXzNXd4	PSMD10	proteasome (prosome, macropain) 26S subunit, non-ATPase, 10	0.151387	7.88487	3.77304	0.000473175	0.00341581	-0.467609
c3umqUACgFKLlHOeH0	NEXN	nexilin (F actin binding protein)	0.151266	7.62025	4.6128	3.3538e-05	0.000476261	2.0526
QgiTqkMBSRLd4Ufom0	NFKBIE	nuclear factor of kappa light polypeptide gene enhancer in B-cells inhibitor, epsilon	0.151222	7.74819	3.97524	0.000254613	0.0021614	0.118815
Z9DlGnuuaROKAeSepE	CAMK1	calcium/calmodulin-dependent protein kinase I	0.150931	7.86909	3.65922	0.000666772	0.00444047	-0.790914
ukdrkmvOfOAMXpJ.uQ	WRNIP1	Werner helicase interacting protein 1	0.150746	8.10484	3.79974	0.000436317	0.00320859	-0.391029
E5w5yFLPwqcN0RdfJ4	LHFPL2	lipoma HMGIC fusion partner-like 2	0.150694	7.74116	5.53547	1.56232e-06	4.86453e-05	5.0064
liCOpICeiVei_nu3u8	FEN1	flap structure-specific endonuclease 1	0.150691	7.84185	5.11791	6.34655e-06	0.00014101	3.65315
NE.53uBzVeZ.gblJJU	ORC5	origin recognition complex, subunit 5	0.150663	7.67136	5.87608	4.92673e-07	2.04315e-05	6.12317
06CvPSuaE8UG7kqObU	KATNA1	katanin p60 (ATPase containing) subunit A 1	0.150516	7.79911	7.01541	1.01804e-08	1.13866e-06	9.88601
9gQLd6tG.5dOBHp5C4	PRKAG2	protein kinase, AMP-activated, gamma 2 non-catalytic subunit	0.150286	7.80813	4.67922	2.70113e-05	0.000406731	2.26016
f97jknkIqpUXQRdfwk	MOBKL1B	MOB1, Mps One Binder kinase activator-like 1B (yeast)	0.150255	7.90042	5.52739	1.60557e-06	4.97412e-05	4.98
fxTO5_XSwDgVR6upIo	ITGA4	integrin, alpha 4 (antigen CD49D, alpha 4 subunit of VLA-4 receptor)	0.150223	7.85831	3.8141	0.000417663	0.00309844	-0.349747
oolS7Qt56DkoLIEg2U	GORASP1	golgi reassembly stacking protein 1, 65kDa	0.149922	7.80823	4.10616	0.000169345	0.00158271	0.506108
irgieSOWIJSQESpUeg	RNF114	ring finger protein 114	0.149833	8.15413	4.81884	1.70927e-05	0.000293577	2.69957
ru9S_80nFxxkn0mUu4	FAM175B	family with sequence similarity 175, member B	0.149683	7.94813	5.36945	2.73365e-06	7.4473e-05	4.4658
rlO6kuCTlDuNDVywCU	RNF135	ring finger protein 135	0.149035	8.10044	3.70625	0.00057897	0.00398616	-0.657935
6e6ETXdRXepdLt_OzQ	APOBR	apolipoprotein B receptor	0.14894	7.72105	4.7728	1.9884e-05	0.000326326	2.55424
36UASnSlAhdUJ7Ox9Q	DSCR3	Down syndrome critical region gene 3	0.14885	8.27472	5.64353	1.08419e-06	3.67091e-05	5.35971
fX6z0pBFHoHQpT4rnk	NDUFA9	NADH dehydrogenase (ubiquinone) 1 alpha subcomplex, 9, 39kDa	0.14868	7.92795	4.27367	9.98192e-05	0.00106037	1.00953
EdY3fYvBsoQeenOPuU	MORC3	MORC family CW-type zinc finger 3	0.14829	7.68879	4.84929	1.54625e-05	0.00027299	2.79592
i.kl53LqElSJenlTTs	PKM2	pyruvate kinase, muscle	0.148267	7.6942	5.08456	7.09253e-06	0.000153351	3.54606
iZLD3TtVMJIntEu5HE	TBPL1	TBP-like 1	0.148119	8.24841	3.42414	0.0013343	0.00762432	-1.44162
WkoCCVUsBHCOhdCWHo	KIAA1468	KIAA1468	0.147943	7.71923	4.90727	1.27702e-05	0.000238538	2.97988
6_RziXMhzS9X_po__8	HPRT1	hypoxanthine phosphoribosyltransferase 1	0.147081	8.22581	3.57303	0.0008619	0.00542764	-1.03222
QBSu3uP3Dw0WelPESs	RAB5A	RAB5A, member RAS oncogene family	0.146761	8.14399	3.49796	0.00107551	0.00648012	-1.23987
BoO4.pLSrHCTq6gdeU	UBIAD1	UbiA prenyltransferase domain containing 1	0.146622	8.03876	3.68926	0.000609316	0.00414672	-0.706067
oUSKOdKWS6PPEQURSY	MATR3	matrin 3	0.146523	7.66883	4.44263	5.81583e-05	0.000717677	1.52548
Ne795C5TX7Eu8IqwTo	ZEB2	zinc finger E-box binding homeobox 2	0.146424	7.90502	3.53278	0.000970791	0.00599399	-1.14386
ioRaPdcY0JQtSefUCI	PRDX3	peroxiredoxin 3	0.145992	8.57666	2.93845	0.00520886	0.0217646	-2.70299
oTptYXmtAHRi3qognQ	CALML4	calmodulin-like 4	0.145983	7.73483	5.20147	4.80142e-06	0.000114897	3.92216
EujpL.ey.6oe6yd_j4	C4orf34	chromosome 4 open reading frame 34	0.145698	8.89431	2.9721	0.00475608	0.0203284	-2.6196
NfX56O6SDURSfNBQRI	EVI2A	ecotropic viral integration site 2A	0.145476	7.62517	3.48246	0.0011255	0.00671847	-1.28242
xoT3o8_9ST5EtUcBfs	EXOC1	exocyst complex component 1	0.145414	7.7668	5.34859	2.93213e-06	7.8551e-05	4.39812
6h7gFtL2gp68gTuokE	IL18R1	interleukin 18 receptor 1	0.145381	7.84957	3.64762	0.000690313	0.00456121	-0.823564
lvrv31_lf_hw7x7UL0	PTPRO	protein tyrosine phosphatase, receptor type, O	0.144783	7.51866	6.80933	2.05127e-08	1.79821e-06	9.20597
chScN6F0iMjSUulQJQ	API5	apoptosis inhibitor 5	0.144296	8.17499	3.47798	0.00114036	0.00677864	-1.29471
uVL9Hd_ER88oKj59Ho	MGAT2	mannosyl (alpha-1,6-)-glycoprotein beta-1,2-N-acetylglucosaminyltransferase	0.14424	8.04647	4.03931	0.00020868	0.00186068	0.307623
ip06xe99zUBf0PTnF4	VAMP7	vesicle-associated membrane protein 7	0.144218	8.14624	2.83564	0.00685411	0.0267753	-2.95385
HpWvAiQIbQPp4pEUko	NA	NA	0.144106	8.1318	4.05683	0.000197587	0.00177879	0.359504
Ni0ikiBQQnrnln8nUg	ANAPC4	anaphase promoting complex subunit 4	0.14408	7.89116	3.76584	0.00048361	0.00346773	-0.488199
3UVCs0lkvuWU0yXF04	STYXL1	serine/threonine/tyrosine interacting-like 1	0.144022	8.03771	2.63503	0.0115314	0.0400623	-3.42527
0VIE_Rjl14U5SLDdJ8	ERICH1	glutamate-rich 1	0.143913	8.04594	2.74452	0.00870341	0.0322494	-3.17101
iE26a5beJ7Jq6f79S8	OSBPL5	oxysterol binding protein-like 5	0.143521	7.77479	3.47162	0.00116179	0.00686825	-1.31213
lKE1EqyK_ru7Gou3ik	TMEM62	transmembrane protein 62	0.143517	7.79393	5.22387	4.45489e-06	0.00010881	3.99442
B.7mrn_C5fk0qPKJDw	TDG	thymine-DNA glycosylase	0.143476	8.21956	3.26325	0.00211877	0.0109609	-1.8726
NVe6qUC.87qSOe60oE	UVRAG	UV radiation resistance associated gene	0.143455	7.84639	4.95236	1.10009e-05	0.000213835	3.12337
uiSUjjAkSOVJHgIvH0	CARD17	caspase recruitment domain family, member 17	0.142919	7.51157	7.89666	5.22016e-10	1.18511e-07	12.7688
i6RUSQkvl8UuACuR4o	ENOPH1	enolase-phosphatase 1	0.142914	7.78391	4.85278	1.52856e-05	0.000271491	2.80698
91egdDB0.R6d.NiLHI	MS4A4A	membrane-spanning 4-domains, subfamily A, member 4	0.142897	7.47626	6.66396	3.36503e-08	2.63664e-06	8.72557
BqC3iYt1wMd6n8n3Uk	ZC3HAV1	zinc finger CCCH-type, antiviral 1	0.142808	7.88586	3.48153	0.00112856	0.00672879	-1.28496
3Rd3o4KT4kLkkCyKXk	MITD1	MIT, microtubule interacting and transport, domain containing 1	0.142736	7.93357	4.77432	1.97852e-05	0.000325126	2.55903
WSCXl8FLZyOV97UqH4	RIPK2	receptor-interacting serine-threonine kinase 2	0.142666	8.09179	3.77851	0.000465379	0.0033719	-0.451926
9OupNSp3hJt91p9ed8	C1QC	complement component 1, q subcomponent, C chain	0.14249	7.55331	4.2637	0.00010303	0.00108276	0.979337
uqF1y9Ruc09xwekVwo	FUT4	fucosyltransferase 4 (alpha (1,3) fucosyltransferase, myeloid-specific)	0.142328	7.61928	7.08627	8.00395e-09	9.38635e-07	10.1195
KdWqh_v9tQo76S6EfI	FOPNL	FGFR1OP N-terminal like	0.142304	7.89679	3.64475	0.000696248	0.00459187	-0.83162
3CdSt82zV_U3gfv5Hk	AKAP7	A kinase (PRKA) anchor protein 7	0.141738	7.71422	5.06895	7.47082e-06	0.000159582	3.49599
TU4d1Lv.3voURW0S9E	CDC42EP3	CDC42 effector protein (Rho GTPase binding) 3	0.141418	7.67685	5.99034	3.34067e-07	1.48635e-05	6.49951
3OZ6_QLrtJ7qjfqV28	C12orf76	chromosome 12 open reading frame 76	0.14141	7.72211	5.50712	1.71922e-06	5.19137e-05	4.91389
uogP8eC57.XK5x.pIk	C9orf72	chromosome 9 open reading frame 72	0.141388	8.00948	2.61392	0.0121654	0.0416601	-3.47344
o1WI6r6Kofb96t9d9U	TADA3	transcriptional adaptor 3	0.141205	8.49764	3.73715	0.000527464	0.00371829	-0.570097
uw5ph2SHf6HQg9f4W0	ANKFY1	ankyrin repeat and FYVE domain containing 1	0.140562	7.7639	3.77579	0.000469236	0.00339291	-0.459719
WpjVO7APdPoex9upew	CCRL2	chemokine (C-C motif) receptor-like 2	0.140152	7.58981	6.03237	2.89544e-07	1.33522e-05	6.63811
x6gOLnSojonyqK6ufU	PSMB9	proteasome (prosome, macropain) subunit, beta type, 9 (large multifunctional peptidase 2)	0.140032	7.80906	3.70673	0.000578136	0.00398253	-0.656576
EbBFAwVVILJSKUv4E0	C20orf72	chromosome 20 open reading frame 72	0.139834	7.95605	3.89478	0.000326315	0.00258805	-0.116301
i6R6e1TOs1KJRQ7e_I	TRIM6	tripartite motif containing 6	0.139766	7.48448	5.38938	2.55637e-06	7.11763e-05	4.53056
xe7erFd4spcw9cX4e4	CLNS1A	chloride channel, nucleotide-sensitive, 1A	0.139737	8.25869	2.77766	0.00798302	0.0300949	-3.09259
Q6GKHA7q5WJ_oQqIrc	CSGALNACT2	chondroitin sulfate N-acetylgalactosaminyltransferase 2	0.139705	7.75055	6.33205	1.04303e-07	6.09568e-06	7.62798
Hu3n5TXlIEpXQlQiU0	CYC1	cytochrome c-1	0.139691	8.77322	2.87226	0.00621933	0.0248647	-2.86518
QN4TRVJlP7AiQf1JLE	SAR1B	SAR1 homolog B (S. cerevisiae)	0.139686	7.66599	4.06312	0.000193748	0.00175135	0.378145
9r8Uo7LVHviiTc.Krw	SMC4	structural maintenance of chromosomes 4	0.13956	7.77889	4.14127	0.000151682	0.00145683	0.610892
xFt6e5xguAECrV0KVY	APOBEC3F	apolipoprotein B mRNA editing enzyme, catalytic polypeptide-like 3F	0.139542	7.93523	3.93308	0.000290038	0.00238108	-0.00467865
T06aXuFCtqii6JzX1M	SYF2	SYF2 homolog, RNA splicing factor (S. cerevisiae)	0.139533	7.98923	3.015	0.00423209	0.0185822	-2.51235
6Uup3plzp3u7nn.hEA	MAPK14	mitogen-activated protein kinase 14	0.139387	7.79415	4.9875	9.79174e-06	0.000197036	3.23545
3XURH31AKCRW_LX.io	NSF	N-ethylmaleimide-sensitive factor	0.139117	7.76891	5.21154	4.64252e-06	0.000112155	3.95462
WpIADoapJ9EKQt9Odo	RHEB	Ras homolog enriched in brain	0.138979	8.40112	3.34943	0.00165606	0.00902603	-1.64327
Kr11jfEp01K9QLn3t0	SLC24A4	solute carrier family 24 (sodium/potassium/calcium exchanger), member 4	0.138872	7.59104	5.06317	7.61563e-06	0.000161313	3.47749
lStL4pAAc6v.0rgXVU	EXOSC3	exosome component 3	0.138658	8.33419	4.40937	6.47171e-05	0.000774048	1.42331
ir_h054gFRKAke1Kyg	MFAP1	microfibrillar-associated protein 1	0.138127	7.89419	4.13935	0.000152598	0.00146303	0.60516
xYfXovD30kIrhXqJsc	SOCS4	suppressor of cytokine signaling 4	0.137999	7.71884	4.70472	2.4852e-05	0.00038301	2.34011
lqu3kUXqCMkQpcOK0U	PHF19	PHD finger protein 19	0.137929	7.95502	3.81574	0.000415579	0.00308897	-0.345022
65ToiySASSTnRXWH98	USP41	ubiquitin specific peptidase 41	0.137619	7.54034	5.28109	3.67774e-06	9.4659e-05	4.1794
fXuUwL1g1VO7d.SJ6U	C4orf41	chromosome 4 open reading frame 41	0.137461	8.00811	4.37382	7.25279e-05	0.000838331	1.31442
rROR.u7dd8PgqKnio4	ABI1	abl-interactor 1	0.137114	8.45299	2.81606	0.00721752	0.0278388	-3.00091
lhXEuXqnWfEMtdXe9c	RPUSD3	RNA pseudouridylate synthase domain containing 3	0.136891	7.90591	4.67422	2.74559e-05	0.000412024	2.2445
QXrTXDDqOKgv1JI.Sk	CD2AP	CD2-associated protein	0.136373	7.557	6.47897	6.32077e-08	4.30498e-06	8.11386
E8.cexPv9.tUL4XKuE	CPNE8	copine VIII	0.136165	7.64538	5.62924	1.13791e-06	3.80192e-05	5.31293
9kJvkoOp_klOJfPotM	PLA2G16	phospholipase A2, group XVI	0.1361	7.70848	4.35931	7.59743e-05	0.000865735	1.27007
N42LQji8uiep_lKi3o	STOML2	stomatin (EPB72)-like 2	0.136007	7.88779	4.19424	0.00012837	0.00128502	0.769755
0eUTfVHVqHSVLEXZ48	NA	NA	0.135811	7.54535	4.3451	7.95033e-05	0.000895006	1.22671
KUV_oun66J6oQr.vxw	SPTLC2	serine palmitoyltransferase, long chain base subunit 2	0.135796	7.60729	6.71078	2.86901e-08	2.33416e-06	8.88034
KWfoRgQJRH3B596YHg	SYNCRIP	synaptotagmin binding, cytoplasmic RNA interacting protein	0.135726	7.9016	4.23392	0.000113233	0.0011651	0.889305
uARXu1OoyLX9Z_S_5U	TPMT	thiopurine S-methyltransferase	0.135655	7.94192	4.26417	0.000102876	0.00108226	0.98076
rZR9OieuH7pf1ABUzc	MRPS31	mitochondrial ribosomal protein S31	0.134978	7.90622	3.97005	0.000258733	0.0021859	0.103592
NUnqGKi.Tvq.IBk4WA	COPS5	COP9 constitutive photomorphogenic homolog subunit 5 (Arabidopsis)	0.134659	8.21187	2.87344	0.00619983	0.0248105	-2.86232
WJene55q53r6WHmO4s	RNH1	ribonuclease/angiogenin inhibitor 1	0.134657	8.14141	2.88246	0.00605254	0.0243642	-2.84035
NqwsZB8f9RQIHtJJ5c	MTHFD2	methylenetetrahydrofolate dehydrogenase (NADP+ dependent) 2, methenyltetrahydrofolate cyclohydrolase	0.134645	7.65399	4.75715	2.09316e-05	0.000337575	2.50493
lW4AaJ4EMp71TslV6U	TNF	tumor necrosis factor	0.134343	7.77173	4.44102	5.84598e-05	0.000719393	1.52054
QHzs9FCVADI_6dUo9Q	DR1	down-regulator of transcription 1, TBP-binding (negative cofactor 2)	0.134272	7.92399	2.71073	0.00949928	0.0345123	-3.25027
Z4ifVeKHeQBiuu3r_g	NA	NA	0.134137	7.67787	3.17643	0.00270708	0.0131719	-2.09993
BZIHS4KCdW4IOiuYUU	ERCC5	excision repair cross-complementing rodent repair deficiency, complementation group 5	0.134128	7.86921	4.08342	0.000181843	0.00167277	0.438411
TlzASPjkbrqBXicsl8	GGPS1	geranylgeranyl diphosphate synthase 1	0.133563	8.0811	4.11962	0.000162348	0.0015349	0.546238
QResT94Iqn8wkp6kpU	ORMDL1	ORM1-like 1 (S. cerevisiae)	0.133481	8.55689	2.57234	0.0135085	0.0449386	-3.5675
K7RPvruR.ur315M8H4	PPP2CA	protein phosphatase 2, catalytic subunit, alpha isozyme	0.133245	8.13797	3.42914	0.00131505	0.00755332	-1.42804
3gRRofXYRTQiQXoSJU	IDH2	isocitrate dehydrogenase 2 (NADP+), mitochondrial	0.133089	7.79447	3.74484	0.00051534	0.0036488	-0.548163
EoBefdcda8_6XVESUE	COPB2	coatomer protein complex, subunit beta 2 (beta prime)	0.132364	8.2511	3.37611	0.00153348	0.00851251	-1.57155
lleo9w313kHt9Sh8ek	PTAR1	protein prenyltransferase alpha subunit repeat containing 1	0.132353	7.87383	3.02815	0.00408254	0.018087	-2.47925
iXWjLVYifvWCQkV5JU	BOLA2	bolA homolog 2 (E. coli)	0.132073	7.91187	2.74598	0.00867043	0.0321541	-3.16756
Bc0rbi1KrcQtWpVUvQ	ODF3B	outer dense fiber of sperm tails 3B	0.132064	7.67147	5.4404	2.15298e-06	6.19917e-05	4.69647
HohZok1CB6CcLMZ5ro	SP100	SP100 nuclear antigen	0.131988	7.90096	3.17127	0.00274652	0.0133248	-2.11333
lxqtHVEuCQp4eOMeWQ	RNFT1	ring finger protein, transmembrane 1	0.131666	7.66754	6.96078	1.22561e-08	1.26181e-06	9.70589
H10pNT1DQgOOud5NLo	HTATIP2	HIV-1 Tat interactive protein 2, 30kDa	0.131482	8.488	3.51625	0.00101921	0.0062242	-1.18949
ijq1ulRHa07nSEGHjg	NDUFA8	NADH dehydrogenase (ubiquinone) 1 alpha subcomplex, 8, 19kDa	0.131253	8.49631	2.96518	0.004846	0.0206232	-2.63678
cmkkomFB42RE5.v6M4	HNRNPAB	heterogeneous nuclear ribonucleoprotein A/B	0.131211	8.12238	3.05167	0.00382755	0.0172113	-2.41987
TFuzS7yO5NW.7T1dIc	TMEM209	transmembrane protein 209	0.130753	7.75327	3.98235	0.000249068	0.00212145	0.139697
KxAVOPtKiuUvEkrj0k	SNX5	sorting nexin 5	0.130255	7.84047	3.65522	0.0006748	0.00448213	-0.802177
6ShS8R1MZAWYxP_eBA	RTCD1	RNA terminal phosphate cyclase domain 1	0.130125	7.76337	4.77778	1.95616e-05	0.000323736	2.56994
x_qx8ol3_yoe5crJO0	CCNT2	cyclin T2	0.129998	7.76183	3.54135	0.000946566	0.00587515	-1.12016
KnUpcrlSnOOLef_Cis	SLC9A9	solute carrier family 9 (sodium/hydrogen exchanger), member 9	0.129396	7.59086	7.11926	7.15648e-09	8.67993e-07	10.2281
ukgAZfJJe7inaLLogg	GNPAT	glyceronephosphate O-acyltransferase	0.128728	7.88268	4.48035	5.15049e-05	0.000655207	1.64171
WR7XlS50iu6N_7gnR4	NA	NA	0.128627	7.78037	3.78762	0.000452684	0.00330651	-0.42581
HuTfddOp686_i_eoe0	C3orf38	chromosome 3 open reading frame 38	0.12854	7.77831	4.59149	3.59436e-05	0.000505953	1.9862
BXpexJ79cXHffsB3nk	KIF5B	kinesin family member 5B	0.128396	7.63192	6.3853	8.69874e-08	5.45578e-06	7.80406
ZqRQrvDpCbkK9AiCgk	HPSE	heparanase	0.128268	7.79554	2.78186	0.00789577	0.0298502	-3.08261
uA4QImLpJ5DoAVQfGo	FAM96A	family with sequence similarity 96, member A	0.128195	7.84283	2.93124	0.00531099	0.0221082	-2.72078
0o6RJ96Nze_OLWCX90	PSMD12	proteasome (prosome, macropain) 26S subunit, non-ATPase, 12	0.128156	7.81563	4.6648	2.83126e-05	0.000418847	2.21502
NVQhcKv83XVfgzq6d4	P2RX7	purinergic receptor P2X, ligand-gated ion channel, 7	0.12814	7.8411	3.45525	0.00121871	0.00712243	-1.35689
6zhu2h0pSegTuSV6Ls	PFKP	phosphofructokinase, platelet	0.127391	7.96508	3.23406	0.00230155	0.0116379	-1.94946
Wtd1NNdLuLXSJdTeUI	IRAK3	interleukin-1 receptor-associated kinase 3	0.127356	7.91527	3.5392	0.000952582	0.00590834	-1.1261
lBKei2_5dLOFgRleog	SAMD4A	sterile alpha motif domain containing 4A	0.127014	7.60373	3.02984	0.00406376	0.0180265	-2.47501
37OZSp290efO99qPeo	C2orf28	chromosome 2 open reading frame 28	0.126787	9.09479	2.75737	0.00841728	0.0313796	-3.14069
HkokooPnrl9PTgCTlQ	KYNU	kynureninase	0.126663	7.78109	4.37666	7.18703e-05	0.000831884	1.32312
3kSJdxekoBC1qMf6SQ	LARP7	La ribonucleoprotein domain family, member 7	0.126505	7.72959	4.43849	5.89366e-05	0.000724757	1.51277
ERYgbff3Pjp6Nz.SlU	DHX29	DEAH (Asp-Glu-Ala-His) box polypeptide 29	0.126474	7.82368	4.86553	1.46562e-05	0.000264559	2.8474
Ze7ST_dQ.kFex3tXqk	ESD	esterase D	0.126377	9.06212	3.13652	0.00302661	0.0143764	-2.20318
ldIp7Ktfq8SJaogYL0	TOR3A	torsin family 3, member A	0.12632	7.64347	4.51376	4.62384e-05	0.000604574	1.74495
Th97_OnxJBSx0EJJ4c	SNX14	sorting nexin 14	0.126052	7.98554	3.13769	0.00301676	0.0143335	-2.20017
HSQOXr3gq0ap7QSu9c	FRMD3	FERM domain containing 3	0.125671	7.64433	3.89752	0.000323584	0.00257413	-0.108342
WeV_fBDlpQemF0a_R8	SLC25A25	solute carrier family 25 (mitochondrial carrier; phosphate carrier), member 25	0.125447	7.84939	4.61403	3.3405e-05	0.00047513	2.05641
QukgUT.vV30Ku37O5Y	CSTF3	cleavage stimulation factor, 3' pre-RNA, subunit 3, 77kDa	0.125146	7.74895	7.00852	1.04212e-08	1.13866e-06	9.86332
ceKIAvDQUrx1RL_Vu4	NA	NA	0.125047	7.76499	4.52238	4.49679e-05	0.000593362	1.77162
f5ISLpTs7k5MxHcS54	PSMA3	proteasome (prosome, macropain) subunit, alpha type, 3	0.124465	7.85605	3.31522	0.00182686	0.00974985	-1.73471
Zi7554JE1_Q7qLkSi0	EIF2B2	eukaryotic translation initiation factor 2B, subunit 2 beta, 39kDa	0.124385	7.92446	4.50293	4.78848e-05	0.00062166	1.71146
fbXiV885e6yJDkIeAI	VCPIP1	valosin containing protein (p97)/p47 complex interacting protein 1	0.124316	7.89114	2.85554	0.006502	0.0257015	-2.90576
xHykJMRKROn8IFEeOU	LUC7L3	LUC7-like 3 (S. cerevisiae)	0.123815	7.85005	2.78393	0.00785311	0.0297143	-3.07768
ccp.nyzTtTv19F0uic	NUSAP1	nucleolar and spindle associated protein 1	0.123673	7.55902	5.745	7.68783e-07	2.89036e-05	5.69237
BpEvXh6mgj198TRIXk	PPPDE2	PPPDE peptidase domain containing 2	0.123526	8.03041	2.85354	0.00653663	0.0257854	-2.9106
9lWeuR4IlFe6ARxN5A	CLTA	clathrin, light chain A	0.123388	8.46167	2.62505	0.0118273	0.0407917	-3.44809
xh7XpNgd1d7uw_iiFE	NUP37	nucleoporin 37kDa	0.123312	7.78941	5.474	1.92246e-06	5.59915e-05	4.8059
uI6Utp0KpQo0p54qDA	MRPS22	mitochondrial ribosomal protein S22	0.123158	7.89001	3.9996	0.000236098	0.00203843	0.190436
lnB1Y3sFVBc1lkV43I	WWP2	WW domain containing E3 ubiquitin protein ligase 2	0.122826	7.67059	5.61392	1.19847e-06	3.96682e-05	5.26278
cOTVIVWO272Qk1ySX0	AK2	adenylate kinase 2	0.122575	7.99106	4.26676	0.000102034	0.0010752	0.988603
HxK5Lp9zv_r454PKi4	NA	NA	0.122193	7.88407	4.42009	6.25266e-05	0.00075553	1.45623
lXSeVTNxvX9JL7ULKI	METAP1	methionyl aminopeptidase 1	0.122149	8.32258	3.44085	0.00127096	0.0073622	-1.39616
oEqyEpSqACkdKkRJPk	CLEC2B	C-type lectin domain family 2, member B	0.121927	7.71922	3.84626	0.000378616	0.00288231	-0.256962
N7R5zufUVmWotUetyA	TMEM219	transmembrane protein 219	0.121727	8.17909	2.64208	0.0113266	0.0395371	-3.40914
oSpKX73ge.Z94e8BFg	C5orf13	chromosome 5 open reading frame 13	0.121659	7.69348	4.59576	3.54481e-05	0.000499898	1.9995
6P3L5YLt59OueBu0pU	C1orf131	chromosome 1 open reading frame 131	0.121587	7.80799	4.29918	9.20413e-05	0.000999305	1.08692
Td9zVITqUK57N4qO54	RCOR3	REST corepressor 3	0.12147	8.06677	2.58162	0.0131974	0.0442276	-3.54659
9U4FV8CUISXV3_JILU	MYOF	myoferlin	0.121415	7.50426	6.86218	1.71367e-08	1.62239e-06	9.38052
Qj_97rsrORPUys5EaU	FAM18B1	family with sequence similarity 18, member B1	0.121124	7.74704	3.83111	0.000396547	0.00298177	-0.300715
rlx3rwjvf9dArlcuU4	ZDHHC6	zinc finger, DHHC-type containing 6	0.120652	8.33803	3.85537	0.000368221	0.00282393	-0.230632
KQlEgFSTtXtEN06kX4	COQ9	coenzyme Q9 homolog (S. cerevisiae)	0.12056	7.91332	5.01813	8.84539e-06	0.0001815	3.33331
fn9CiKQYgL6SgLhlNU	SAT2	spermidine/spermine N1-acetyltransferase family member 2	0.120396	8.06625	3.21169	0.00245163	0.0122005	-2.00807
ZIEQQlXHj96v3lGlEo	ATL3	atlastin GTPase 3	0.120313	7.63335	6.7839	2.23672e-08	1.93209e-06	9.12197
onOCeoe5eIKA33lDuo	SETDB2	SET domain, bifurcated 2	0.120129	7.83048	3.69702	0.000595281	0.00408101	-0.684113
WWhNVCFdptN.rt069c	NUDT14	nudix (nucleoside diphosphate linked moiety X)-type motif 14	0.120117	7.76131	4.32967	8.35188e-05	0.000928406	1.17967
rX6h1rVZl5j_v2.9.4	NTNG2	netrin G2	0.12002	7.52188	6.64222	3.62367e-08	2.78991e-06	8.65371
i4K3kIF4dt4e7uii1I	TFCP2	transcription factor CP2	0.119992	7.79267	4.55758	4.01235e-05	0.000546925	1.88079
ZrnC3jvf1ODT7rr4jo	RNASEL	ribonuclease L (2',5'-oligoisoadenylate synthetase-dependent)	0.119761	8.21214	2.83073	0.0069436	0.0270355	-2.96567
Kvcv3oKwl6iETCQ9Hk	IBTK	inhibitor of Bruton agammaglobulinemia tyrosine kinase	0.119535	7.66158	3.71432	0.000565064	0.00391324	-0.635022
Bhvjh7RHo110gHFofs	ALG6	asparagine-linked glycosylation 6, alpha-1,3-glucosyltransferase homolog (S. cerevisiae)	0.119375	7.78803	4.79855	1.8272e-05	0.00030965	2.63546
xtpJ0Dv6i5CA8pFUow	N4BP2L1	NEDD4 binding protein 2-like 1	0.119361	7.7049	4.96074	1.06999e-05	0.00021006	3.15007
ig3Xne4Oc0hVApQX6k	SLC39A11	solute carrier family 39 (metal ion transporter), member 11	0.119298	7.60207	4.41999	6.25484e-05	0.00075553	1.4559
6XE1SJMwIB0Ul6Bl7U	LRRC8C	leucine rich repeat containing 8 family, member C	0.119153	7.57805	6.20484	1.60917e-07	8.506e-06	7.20751
cSXdQq.0XyQQ6ie6i4	TOR1A	torsin family 1, member A (torsin A)	0.119129	8.22553	3.4575	0.00121072	0.00708739	-1.35073
r44yMUgS6efIuKkqD0	C4orf33	chromosome 4 open reading frame 33	0.118914	7.55356	6.00298	3.19999e-07	1.43457e-05	6.54119
c_Rx.9Lr361X8UTfq4	MIER1	mesoderm induction early response 1 homolog (Xenopus laevis)	0.118775	8.07185	2.64939	0.0111177	0.0389923	-3.39236
3enAQXhAe6UqgWEQV0	NA	NA	0.118483	7.64019	5.63066	1.13246e-06	3.79085e-05	5.31758
9eXWjLVYifvWCQkV5I	BOLA2	bolA homolog 2 (E. coli)	0.118446	7.90479	2.55539	0.0140938	0.0464409	-3.60551
K_uqerFDnkrQSc56yk	IL15	interleukin 15	0.118168	7.66736	5.06478	7.57512e-06	0.000160881	3.48263
EQ7_u.u6A83l67uREI	RDH14	retinol dehydrogenase 14 (all-trans/9-cis/11-cis)	0.118105	8.04144	2.54828	0.0143461	0.0470707	-3.6214
KXukJSQjpXrhJAIB5E	NA	NA	0.118095	7.52888	7.65772	1.16208e-09	2.21269e-07	11.9925
6aaey6nd9dfUW4VQXc	NA	NA	0.11806	8.03554	3.02251	0.00414613	0.0183151	-2.49347
3rfEl9QDB1L6kVOJyg	PGM2	phosphoglucomutase 2	0.117744	7.66676	5.71967	8.37735e-07	3.04872e-05	5.60924
Zl5rjUey5KT6md6Rfc	PTPN2	protein tyrosine phosphatase, non-receptor type 2	0.117739	7.65699	5.5633	1.42215e-06	4.52939e-05	5.09729
6hygVInCze4pDd5gZ4	PARP11	poly (ADP-ribose) polymerase family, member 11	0.117709	7.53478	6.24234	1.41612e-07	7.62209e-06	7.33142
f5516boB8LiFFAxPrU	PRPS2	phosphoribosyl pyrophosphate synthetase 2	0.117648	7.75825	4.53004	4.38672e-05	0.000586708	1.79535
BnCDIe6t10fulS5394	CLIP4	CAP-GLY domain containing linker protein family, member 4	0.117591	7.63789	5.22396	4.45353e-06	0.00010881	3.99472
KKJ4k60959WOEEaF2U	SERPINB8	serpin peptidase inhibitor, clade B (ovalbumin), member 8	0.11758	7.60833	5.57489	1.36754e-06	4.41905e-05	5.13515
9nTXnunvp98gRQFqIg	CCDC90B	coiled-coil domain containing 90B	0.11697	8.05216	2.70367	0.00967368	0.0350002	-3.26673
EW1FuE685NfyPBdFA4	FBXO28	F-box protein 28	0.116958	7.71129	5.00997	9.0885e-06	0.000185842	3.3072
3gLIXo9O6nfU6fC75U	DRAM2	DNA-damage regulated autophagy modulator 2	0.116949	7.63945	4.74766	2.15931e-05	0.000345099	2.47505
cFIhp.vdUnCluiee7g	FAM125B	family with sequence similarity 125, member B	0.116672	7.57162	6.4966	5.95215e-08	4.13677e-06	8.17216
WnXRqY6e3.fh.s30eU	RNASEL	ribonuclease L (2',5'-oligoisoadenylate synthetase-dependent)	0.116581	8.32783	3.53218	0.000972518	0.00600047	-1.14552
uF_JShglCEG4dULJKI	PAG1	phosphoprotein associated with glycosphingolipid microdomains 1	0.116538	7.72303	5.4139	2.35395e-06	6.65874e-05	4.61025
W.lXdFJboJSSzYndEs	TUBB	tubulin, beta	0.1164	7.92765	3.13139	0.00307014	0.0145286	-2.21638
i0KuGYneV.BaAbdXnQ	SCAND1	SCAN domain containing 1	0.116334	7.7357	4.73214	2.27195e-05	0.000358571	2.42623
ckLEgoNz3SSpMqRkek	YEATS2	YEATS domain containing 2	0.116235	7.71705	5.41216	2.36776e-06	6.67648e-05	4.60459
cfeXR9iSH.vdpnXRjo	DRAM1	DNA-damage regulated autophagy modulator 1	0.116176	7.72211	3.38435	0.0014974	0.00835675	-1.54933
ooUd4qHfeTPnheIo6U	CDK5RAP1	CDK5 regulatory subunit associated protein 1	0.116133	7.9026	4.77946	1.94545e-05	0.000322868	2.57522
0e.hddVd584KrJOPe4	PLEKHA2	pleckstrin homology domain containing, family A (phosphoinositide binding specific) member 2	0.116111	8.86507	2.62446	0.011845	0.0408316	-3.44944
KGSFUR1Oi3oOTqJ5VU	LILRB1	leukocyte immunoglobulin-like receptor, subfamily B (with TM and ITIM domains), member 1	0.116083	7.50835	4.40927	6.47371e-05	0.000774048	1.42302
lVSSL4svskhFE5X4lw	ZNF25	zinc finger protein 25	0.116046	7.67091	4.71045	2.43904e-05	0.000377838	2.35811
xilKK1KWQ4ju.uU_RE	HPS5	Hermansky-Pudlak syndrome 5	0.116033	7.61611	5.3715	2.71481e-06	7.41093e-05	4.47248
iOBucgSdFkeOeV6p7g	NLRC4	NLR family, CARD domain containing 4	0.116018	7.68851	4.23985	0.000111126	0.0011501	0.907212
0ktegVNVTox4pMnse4	C19orf12	chromosome 19 open reading frame 12	0.115999	7.8505	3.5163	0.00101907	0.0062242	-1.18937
fqdFOSOatEeLnogrvM	NA	NA	0.115989	7.9442	4.10999	0.000167324	0.00156937	0.517524
lo1eNU.13htRdcVTKI	CDK2	cyclin-dependent kinase 2	0.11595	7.68078	6.20882	1.58751e-07	8.41663e-06	7.22065
orrHujizeQhSePv9Ok	RTCD1	RNA terminal phosphate cyclase domain 1	0.115847	7.77245	6.12015	2.14738e-07	1.06441e-05	6.92779
cZeO2oSV51QsQMi4Vs	MT1G	metallothionein 1G	0.115808	7.54856	4.18765	0.000131069	0.00130776	0.749936
oU_kSor_F31ec81ddU	CHN2	chimerin (chimaerin) 2	0.115654	7.6079	5.48552	1.84922e-06	5.44184e-05	4.84343
9NVUCF94_C07EvS6XA	SLC25A43	solute carrier family 25, member 43	0.115516	7.68737	4.78533	1.90829e-05	0.000318193	2.59374
QnqHdJK1BN6A0XxxEI	CARD17	caspase recruitment domain family, member 17	0.1154	7.52773	5.2425	4.18554e-06	0.000103661	4.05459
3mFN0u0IgG7S4sXoU0	NOL11	nucleolar protein 11	0.115303	8.12946	3.22795	0.00234163	0.0117934	-1.96548
uXnlI7s4OlIN5NCV14	ME2	malic enzyme 2, NAD(+)-dependent, mitochondrial	0.115032	8.38578	2.99326	0.0044904	0.0193894	-2.56681
3kLhNJ6e459gMreddE	RAB7L1	RAB7, member RAS oncogene family-like 1	0.114639	7.9689	3.47282	0.00115771	0.00685646	-1.30884
Q6KC9xHZdFBJYRriFE	FZD2	frizzled family receptor 2	0.114611	7.58675	5.33879	3.03034e-06	8.10593e-05	4.36631
x6tF3qfWSRXUKaLol8	NA	NA	0.11459	7.64121	4.32831	8.38816e-05	0.000931825	1.17553
cSU3eS93S5KS99d0p4	TTF2	transcription termination factor, RNA polymerase II	0.114588	7.58332	6.72924	2.69422e-08	2.25044e-06	8.94134
f1Bk1eeNSDtFaCjkoE	PSG9	pregnancy specific beta-1-glycoprotein 9	0.114277	7.71213	2.88343	0.00603693	0.0243155	-2.83799
64VSRF3pwVMVRF5Unc	ASGR2	asialoglycoprotein receptor 2	0.114204	7.56845	4.77661	1.96371e-05	0.0003245	2.56625
ZKcgDHZH10gV39_8Go	BMPR2	bone morphogenetic protein receptor, type II (serine/threonine kinase)	0.11419	7.5628	5.87822	4.89102e-07	2.0331e-05	6.13021
9g6u0_hKOt5.8C4d6k	EXOSC3	exosome component 3	0.114181	7.87826	4.8877	1.36226e-05	0.000249979	2.91773
3n0prAUEnRAogIkcUo	KTN1	kinectin 1 (kinesin receptor)	0.114038	7.68871	3.05771	0.00376448	0.0170098	-2.40456
HHIB6kTrIp0TqL7XRU	ERLEC1	endoplasmic reticulum lectin 1	0.113672	7.9399	2.84261	0.00672881	0.0263709	-2.93703
3X5F_5LNfz97nvd14k	ANKIB1	ankyrin repeat and IBR domain containing 1	0.113626	7.89549	2.87093	0.00624145	0.0249433	-2.86843
6fU3p5HUKVXe1.0gRM	PAQR4	progestin and adipoQ receptor family member IV	0.11358	7.67158	4.95155	1.10304e-05	0.000214173	3.1208
QiicJKVpL6KClIoEn8	EIF2B5	eukaryotic translation initiation factor 2B, subunit 5 epsilon, 82kDa	0.113423	7.57528	4.95946	1.07453e-05	0.000210485	3.14599
HtXusgB8d.OXrksw9U	KCTD6	potassium channel tetramerisation domain containing 6	0.113421	7.80181	4.69576	2.55909e-05	0.000392009	2.31199
TS5N5MgS9fNfpfe.z4	NCK1	NCK adaptor protein 1	0.113381	8.1712	2.63099	0.0116504	0.0403569	-3.43452
KucVf485IQXTSeXB80	RASA1	RAS p21 protein activator (GTPase activating protein) 1	0.113211	7.85962	3.24801	0.00221238	0.0112966	-1.91277
HXJ1__uJ9_5fDXuFSU	APEX2	APEX nuclease (apurinic/apyrimidinic endonuclease) 2	0.113058	7.90766	4.16483	0.000140843	0.00137869	0.681453
ud3s4QdxIL7mbn90kk	AGA	aspartylglucosaminidase	0.11299	7.60474	4.85569	1.51395e-05	0.000270525	2.81621
foC4I5IvHum.pGpNG4	NA	NA	0.112833	7.75152	6.35628	9.60332e-08	5.78407e-06	7.7081
x5EAUeUjBSKpeoKiCA	GCH1	GTP cyclohydrolase 1	0.112761	7.5135	6.23752	1.43958e-07	7.72169e-06	7.31549
EheiMqyXn_XuuoJ0sE	BIRC2	baculoviral IAP repeat containing 2	0.112674	7.79178	3.81943	0.000410933	0.00307251	-0.334398
Be7EBVUC7V45SQV_Ro	TAPBP	TAP binding protein (tapasin)	0.11265	7.68502	3.5804	0.000843282	0.00533125	-1.01171
Hjgi5_CIupcLpnXnjk	CMAS	cytidine monophosphate N-acetylneuraminic acid synthetase	0.11263	7.85035	4.19952	0.000126248	0.00127043	0.78563
3.orDPq_D3h5V.cnoU	RPE	ribulose-5-phosphate-3-epimerase	0.112513	7.58701	6.17038	1.80966e-07	9.26167e-06	7.09366
TKeSE_i_Y6lIesSO.k	ATP2C1	ATPase, Ca++ transporting, type 2C, member 1	0.112489	7.66445	5.65928	1.0279e-06	3.52754e-05	5.41129
6PlAxH.UD_1QSV7CUk	FAM188A	family with sequence similarity 188, member A	0.112284	7.70304	3.83264	0.000394701	0.00297188	-0.296304
ECgp1eTtefnkZROrus	MCM4	minichromosome maintenance complex component 4	0.112262	7.53291	6.18177	1.74077e-07	9.01331e-06	7.13129
uU2TOod_UtfhPtqf9A	NA	NA	0.112176	7.69325	3.50858	0.00104248	0.00633705	-1.21065
E9FNt9DlTiX9ZarErs	NA	NA	0.112134	8.22617	2.58148	0.0132021	0.0442351	-3.54691
uoxkgoTf3LcEtKJ53o	CXorf26	chromosome X open reading frame 26	0.112089	7.87183	3.59302	0.000812288	0.00517969	-0.976542
B3p6MO9LtqkaIsV7ok	MARCO	macrophage receptor with collagenous structure	0.111976	7.57444	4.85073	1.53889e-05	0.000272491	2.8005
xdez3g64HegkqPu3p0	UFM1	ubiquitin-fold modifier 1	0.111897	7.93344	2.7845	0.0078414	0.029703	-3.07633
uU9QilPv.uuoopBxPg	SCFD1	sec1 family domain containing 1	0.111873	8.13312	2.66938	0.0105643	0.0374972	-3.34631
QqQF0qheQ0ghuCkj.Q	MS4A14	membrane-spanning 4-domains, subfamily A, member 14	0.111819	7.60839	4.11928	0.000162521	0.00153571	0.545225
BlpDqSl5Ax6RIk8NMQ	HMGCS1	3-hydroxy-3-methylglutaryl-CoA synthase 1 (soluble)	0.111737	7.71097	4.65485	2.92464e-05	0.000429792	2.18389
EpTVAnPeqkEiuAcepQ	FUCA2	fucosidase, alpha-L- 2, plasma	0.111709	7.70747	6.64243	3.62114e-08	2.78991e-06	8.65438
Zl9JNd9MSyeqAOUg.A	NA	NA	0.111688	7.81205	3.2577	0.00215239	0.0110757	-1.88723
o5TbtxN7qdIEcbST38	NA	NA	0.111375	8.64021	3.48484	0.00111766	0.00668542	-1.27588
l6gaulae7h.BVC3JCQ	CLTA	clathrin, light chain A	0.111182	8.09487	3.31973	0.00180344	0.00965941	-1.7227
rowuonJSMCeSgMk9Sk	NA	NA	0.110627	7.56512	4.02687	0.000216915	0.00191578	0.27087
r2Uj34wTlPT5XyuPhU	FTSJD1	FtsJ methyltransferase domain containing 1	0.110618	7.65873	3.75774	0.000495622	0.00354176	-0.511355
oqQiIRpt.6Ai6zNJeo	TTC37	tetratricopeptide repeat domain 37	0.11057	7.96762	3.63771	0.000711058	0.00467561	-0.851421
fo.6Hp2kRI44DhKcbo	MAPK14	mitogen-activated protein kinase 14	0.110422	7.61337	4.29521	9.32113e-05	0.00101015	1.07487
06eOOwV6GF406cCOF0	NA	NA	0.110409	8.68346	2.82679	0.00701625	0.0272464	-2.97515
WqPEpuLhTlydH1K.BI	DTX3L	deltex 3-like (Drosophila)	0.109878	7.68265	3.08539	0.00348795	0.0160353	-2.33422
HRPf.670yffdMSuUhE	CCP110	centriolar coiled coil protein 110kDa	0.109876	7.73421	4.01976	0.000221766	0.00195045	0.249871
QgrTBiLqB0FSNWVde0	FXYD6	FXYD domain containing ion transport regulator 6	0.109745	7.51158	7.01871	1.00667e-08	1.13542e-06	9.89691
HrnXlRFJR.rhDhX1CA	NA	NA	0.10945	7.74123	3.57968	0.000845078	0.00534021	-1.01371
r4mlOXXq54G_T3teOE	WDR61	WD repeat domain 61	0.109449	7.91902	3.66338	0.000658514	0.00440535	-0.779184
ukrjIIkBRtUYNUMOEk	MAPKAPK5	mitogen-activated protein kinase-activated protein kinase 5	0.109371	7.7426	4.3902	6.88209e-05	0.000810293	1.36455
HVIERN4hKFMPPslUUI	USPL1	ubiquitin specific peptidase like 1	0.109096	7.82133	4.26216	0.000103537	0.00108744	0.974656
BWzioHuyEKxStLffU4	SP100	SP100 nuclear antigen	0.108721	7.63315	5.21363	4.61012e-06	0.00011183	3.96138
fSVd01eiR3lnQiev7w	DGUOK	deoxyguanosine kinase	0.10845	8.97488	2.54393	0.0145023	0.0474514	-3.6311
3p3cVJyBF9SEfnoSc0	DNAJC9	DnaJ (Hsp40) homolog, subfamily C, member 9	0.108376	7.90312	3.73204	0.000535659	0.00376407	-0.584637
l5cXJ5NzDtJ81wp7UY	MAPK6	mitogen-activated protein kinase 6	0.108271	7.58526	5.35708	2.84973e-06	7.6735e-05	4.42564
lj3sBXotOu_eo5rl80	SLC25A24	solute carrier family 25 (mitochondrial carrier; phosphate carrier), member 24	0.108218	7.53447	6.71031	2.87355e-08	2.33416e-06	8.8788
BCrSnX.y9Ij0pJR1S4	MUDENG	MU-2/AP1M2 domain containing, death-inducing	0.10816	7.92717	3.67655	0.000633012	0.00427024	-0.741999
iV1NbfroRe7p3Reb.g	RGS12	regulator of G-protein signaling 12	0.108127	7.67585	4.25922	0.000104505	0.00109501	0.96578
l1JThIKH3W5ULo9NPU	ARMC10	armadillo repeat containing 10	0.108068	7.8712	3.43148	0.00130609	0.00751651	-1.42165
NVuQq1Q5fQEKHO_0pU	IWS1	IWS1 homolog (S. cerevisiae)	0.107989	7.83806	3.71026	0.000572024	0.00395371	-0.646559
3oSe7f56os4IR36he4	NA	NA	0.107803	8.23516	3.2432	0.00224275	0.0114201	-1.92543
6wSpE.eFgV3QpIoov4	MTSS1	metastasis suppressor 1	0.10766	7.81738	3.22341	0.00237187	0.0118949	-1.97739
rkkenSKtKBItD9Kp3c	GTF2A2	general transcription factor IIA, 2, 12kDa	0.107655	8.81885	2.84931	0.00661046	0.0260029	-2.92085
ZxJFVFxHooS0gJTtS0	TRMT1L	TRM1 tRNA methyltransferase 1-like	0.107634	7.6981	5.7965	6.45551e-07	2.51793e-05	5.86148
feoz5AGLAlRKNT31V0	DDX59	DEAD (Asp-Glu-Ala-Asp) box polypeptide 59	0.107435	7.96898	3.19473	0.00257152	0.0126737	-2.05234
Ni6Cd9NxBWFFog9eqY	ATP1B3	ATPase, Na+/K+ transporting, beta 3 polypeptide	0.10724	7.73148	3.93084	0.000292044	0.00239201	-0.0112089
NTupe8t9gn1I6.u.4o	RAB11FIP2	RAB11 family interacting protein 2 (class I)	0.10723	7.73536	4.05643	0.000197835	0.00177946	0.358315
ckt736erQd5.1ZBeq8	P2RX4	purinergic receptor P2X, ligand-gated ion channel, 4	0.107228	7.72728	4.07532	0.000186505	0.00170678	0.414352
BPSA_tQw5G5.lerElI	C7orf42	chromosome 7 open reading frame 42	0.107205	7.91975	3.55629	0.000905686	0.0056591	-1.07874
f9SXlLTg3SEl5Rc_V4	ZNF586	zinc finger protein 586	0.106948	8.26856	2.58475	0.0130939	0.0439807	-3.53953
ovvJ5I8FUlXe33vCxI	KIFAP3	kinesin-associated protein 3	0.106893	7.63617	5.88696	4.74795e-07	1.98294e-05	6.15897
WU.npH.DqThLv3g3i0	ZNF684	zinc finger protein 684	0.106215	7.47621	6.38358	8.74995e-08	5.45578e-06	7.79837
iyq_JRTeFkJ5tu2Wvc	SLC3A2	solute carrier family 3 (activators of dibasic and neutral amino acid transport), member 2	0.106037	7.60212	5.08193	7.15495e-06	0.000154512	3.53761
ZOidegkki1.hUoLn0o	SMARCAL1	SWI/SNF related, matrix associated, actin dependent regulator of chromatin, subfamily a-like 1	0.105991	7.72936	5.3008	3.44256e-06	8.97804e-05	4.24318
EOWzKdugerjehXek3c	NA	NA	0.105928	7.80795	4.53215	4.35686e-05	0.000583154	1.80189
o_jXUjJR5f9dCokG8k	CRYZL1	crystallin, zeta (quinone reductase)-like 1	0.105857	7.71314	4.71456	2.40652e-05	0.000374141	2.37099
x99e0A3dcUI671HtSU	ARL2BP	ADP-ribosylation factor-like 2 binding protein	0.105804	8.51537	2.58244	0.0131703	0.0441621	-3.54475
rSTjV0ngdAJbQIX5dU	CCNB2	cyclin B2	0.105746	7.49871	3.84297	0.000382449	0.00290661	-0.266489
xdQK6yQiixUvKr6JVQ	PIP4K2C	phosphatidylinositol-5-phosphate 4-kinase, type II, gamma	0.105529	7.70657	4.80773	1.77286e-05	0.000302737	2.66447
3i9eD.gSjxeiXolH8I	ABCE1	ATP-binding cassette, sub-family E (OABP), member 1	0.105451	7.74857	2.89619	0.0058346	0.0237679	-2.80683
9X0qSCEed.sFSUUUAI	ZNF434	zinc finger protein 434	0.105431	7.69657	4.58631	3.65529e-05	0.000512516	1.97009
iWqO3o54QqIlCx7w5Q	UPRT	uracil phosphoribosyltransferase (FUR1) homolog (S. cerevisiae)	0.105232	7.60507	6.55533	4.87242e-08	3.53751e-06	8.36637
iSdqXuw_yiCEdJLj5Q	INTS10	integrator complex subunit 10	0.105099	8.1782	4.14071	0.000151946	0.00145836	0.609232
HTg6PerojlXhX4QNzY	APOL6	apolipoprotein L, 6	0.104989	7.5085	6.72778	2.70758e-08	2.25098e-06	8.93654
oXUkKUoEd90UgBThSk	EDEM2	ER degradation enhancer, mannosidase alpha-like 2	0.104769	8.16159	3.38141	0.00151017	0.00840946	-1.55725
cg3llXU33F3g6UV8hU	C2	complement component 2	0.104662	7.54676	5.10974	6.52185e-06	0.000144181	3.62689
QcZ6LXge6sgBGF6f7I	TMEM51	transmembrane protein 51	0.104575	7.62029	3.55203	0.00091718	0.00571881	-1.09057
EriFFI_dKgdSglSDgY	NA	NA	0.104276	7.89234	4.46527	5.40707e-05	0.000676668	1.59519
lpT7JXe7vRJTXseT1k	MCTP1	multiple C2 domains, transmembrane 1	0.104233	7.58686	3.9825	0.000248952	0.00212145	0.140142
66Ekq73SdUmCXUQSDo	TTYH2	tweety homolog 2 (Drosophila)	0.104156	7.54398	5.9836	3.4181e-07	1.50942e-05	6.47731
0bMAcJ7lUFGeFO00oU	SIGLEC16	sialic acid binding Ig-like lectin 16 (gene/pseudogene)	0.104136	7.49597	6.63286	3.74115e-08	2.84703e-06	8.62274
iiHrXr.vV.rEhd_0uc	GTF2E1	general transcription factor IIE, polypeptide 1, alpha 56kDa	0.104101	7.58348	5.14269	5.84322e-06	0.000132729	3.7328
ozocU6JIDbiX2.ntHI	C3orf38	chromosome 3 open reading frame 38	0.103962	7.68223	4.349	7.85202e-05	0.00088789	1.23859
H3iFCp_fheOP9fSd3g	KIAA1826	KIAA1826	0.103653	7.5924	5.51409	1.67931e-06	5.11827e-05	4.93659
6Kp7C5QTh7gqUi4IV4	NA	NA	0.10359	7.55735	7.69703	1.01841e-09	2.00379e-07	12.1205
WpTUoRRj3VAsX4HfLg	EBAG9	estrogen receptor binding site associated, antigen, 9	0.10334	7.93648	2.89382	0.00587167	0.0238721	-2.81262
rsSn.JFgu610hS5eUE	CLN5	ceroid-lipofuscinosis, neuronal 5	0.103245	7.61287	5.49827	1.77134e-06	5.26289e-05	4.88502
Te_uuOj.sn55_.RR60	FEZ2	fasciculation and elongation protein zeta 2 (zygin II)	0.102958	7.96314	2.74603	0.00866931	0.0321541	-3.16745
06jt6JSj760.h05fgk	ACAT1	acetyl-CoA acetyltransferase 1	0.102882	7.7908	2.91656	0.00552465	0.0228526	-2.7569
oJ1.tndOntI161dRHo	AGPAT3	1-acylglycerol-3-phosphate O-acyltransferase 3	0.102597	7.59056	5.26474	3.88501e-06	9.79995e-05	4.12649
9oen96_j9Kwju.ClIk	IGF2BP3	insulin-like growth factor 2 mRNA binding protein 3	0.102391	7.47275	6.29744	1.17365e-07	6.63995e-06	7.51354
oBNOIuil5RUgKRMcuU	FBXL5	F-box and leucine-rich repeat protein 5	0.102255	7.72823	3.37018	0.00155994	0.00861631	-1.58751
fuiuqN5UElKKR5IJ3c	DDAH2	dimethylarginine dimethylaminohydrolase 2	0.102241	7.62614	4.72023	2.36226e-05	0.000369144	2.38881
TvcQfkSrBIoLp4pci0	KIAA1310	KIAA1310	0.10213	8.16561	2.63625	0.0114956	0.0399692	-3.42247
lgkOHup6gHsXF3fVHk	ZNF410	zinc finger protein 410	0.102117	7.92073	3.87736	0.000344242	0.00268894	-0.166922
K4Ou.WiiQtf9QeruTk	PHTF1	putative homeodomain transcription factor 1	0.102097	7.66171	5.66802	9.97941e-07	3.45823e-05	5.43991
r_yPogRTsInHCdFF9U	TMEM144	transmembrane protein 144	0.101948	7.50097	7.00919	1.03976e-08	1.13866e-06	9.86552
T4CiS6Vm4_6T8KJLpU	TPK1	thiamin pyrophosphokinase 1	0.101947	7.88576	3.15359	0.00288581	0.0138562	-2.15912
KlLxSPETVS659fHUoU	DRG1	developmentally regulated GTP binding protein 1	0.101922	7.86147	3.68799	0.000611647	0.00415647	-0.709663
3oeDevdd_xFXQVzkl4	SUV39H1	suppressor of variegation 3-9 homolog 1 (Drosophila)	0.101915	7.71903	3.95366	0.000272189	0.00227247	0.0555208
cJTeEkpRy4S.f_71zo	MAP3K8	mitogen-activated protein kinase kinase kinase 8	0.101912	7.90587	2.82176	0.00710992	0.0275016	-2.98723
QGSUg18Le7v3u3Qh6k	TUFT1	tuftelin 1	0.101814	7.57757	4.74229	2.19767e-05	0.000349967	2.45814
0pV7l98NSS0J.6iF4A	PDXDC1	pyridoxal-dependent decarboxylase domain containing 1	0.101733	8.02556	3.36865	0.00156686	0.00864897	-1.59163
clyu1_J4FkeCB37XR4	CDCA5	cell division cycle associated 5	0.101455	7.55501	4.51734	4.57063e-05	0.000600867	1.75603
BenUqXufgChIws_VIk	EPS15	epidermal growth factor receptor pathway substrate 15	0.101452	7.67489	4.58369	3.68654e-05	0.000516058	1.96193
NdUoH9ZRj1KOjPEnhI	DHX36	DEAH (Asp-Glu-Ala-His) box polypeptide 36	0.101406	7.72366	3.99449	0.000239866	0.00206492	0.175412
KuovxRRyF5GoIPnAqI	NA	NA	0.10108	7.68679	4.07408	0.000187229	0.00171164	0.410671
iq.jDdUtfLAj4iKeiQ	GOLT1B	golgi transport 1B	0.101077	7.68124	2.76016	0.00835627	0.0312113	-3.13408
HW7u2kueu37b9Zic8c	CRSP8P	mediator complex subunit 27 pseudogene	0.101036	7.94029	3.68859	0.000610556	0.00415356	-0.707982
uBujoq7tKivqEikiCI	NA	NA	0.101006	7.6462	2.81182	0.00729865	0.0280905	-3.01109
cNusCkp7TIvO7y3Si0	MTX2	metaxin 2	0.100961	7.63937	3.95207	0.000273529	0.00228044	0.0508646
QdI4Ir2EqHQJc9S_lw	GLRX3	glutaredoxin 3	0.100824	7.76653	3.82481	0.000404238	0.00302931	-0.318873
fgPeXihJJUufpiL14Q	UPB1	ureidopropionase, beta	0.100784	7.48697	5.83399	5.68394e-07	2.27204e-05	5.98472
K63vX_n936K6tkkUjo	TIMELESS	timeless homolog (Drosophila)	0.100692	7.57249	6.12424	2.11768e-07	1.05337e-05	6.94129
or3hBLFTVUSxV9J0v0	NA	NA	0.100682	7.73268	4.99946	9.4108e-06	0.000191319	3.27365
0aZXcBf5XN7_RC_S7k	AMZ2	archaelysin family metallopeptidase 2	0.100525	8.55059	2.86681	0.00631022	0.025133	-2.87843
ceO2n_o54Le0KDO6FU	AGPS	alkylglycerone phosphate synthase	0.100365	7.68565	5.1314	6.06747e-06	0.000136675	3.6965
Wfd1U2dRBeAWIKL54U	TMEM109	transmembrane protein 109	0.100341	8.06132	2.95102	0.00503518	0.0212192	-2.67191
TtL5_55XtzvOd4Mrdo	CEP44	centrosomal protein 44kDa	0.100194	7.84961	3.00398	0.00436126	0.0189845	-2.53999
TnNkCBNeuyUhd3iITo	CUTC	cutC copper transporter homolog (E. coli)	0.10013	7.74818	3.86496	0.000357571	0.00276602	-0.202869
TWn13iT2Ol8kXTQlJE	NIPA2	non imprinted in Prader-Willi/Angelman syndrome 2	0.100111	8.59845	2.52219	0.0153076	0.0494231	-3.67943
TbELVOEDfvfX0msfEU	WDSUB1	WD repeat, sterile alpha motif and U-box domain containing 1	0.0999578	7.69824	4.43144	6.02894e-05	0.000736279	1.49107
WCeLiXWU1JOEB7pYWQ	ARPC1A	actin related protein 2/3 complex, subunit 1A, 41kDa	0.0998889	7.97585	3.28943	0.00196659	0.0103336	-1.8033
W7DzRUiKvaSpAt6CnU	BARD1	BRCA1 associated RING domain 1	0.0998472	7.63303	4.34718	7.89783e-05	0.000890302	1.23304
feh8QDlCquHoL7ozSo	KLF4	Kruppel-like factor 4 (gut)	0.099803	7.70467	2.54639	0.0144136	0.0472309	-3.6256
ZubFEd711NLgR_n59c	ASCC1	activating signal cointegrator 1 complex subunit 1	0.0997551	7.84376	2.95626	0.00496441	0.0210009	-2.65893
6vSskuJPvTOIOmnq40	SLC30A9	solute carrier family 30 (zinc transporter), member 9	0.0997331	7.86945	2.82021	0.00713897	0.0275959	-2.99095
6Il_7VwL3tUtJLfzLU	PDCD6IP	programmed cell death 6 interacting protein	0.0997165	7.85214	3.12371	0.0031364	0.014779	-2.23612
0xUgV0IS0uoWQIXqXc	MB21D1	Mab-21 domain containing 1	0.0994248	7.48119	6.47737	6.35549e-08	4.31199e-06	8.10854
9VxeAlN0IddI5RQQVQ	PYHIN1	pyrin and HIN domain family, member 1	0.0992012	7.97539	2.88628	0.00599123	0.0241834	-2.83105
EslAnRf4EjVrhPc.Uo	TXK	TXK tyrosine kinase	0.0990938	7.93499	2.54937	0.0143071	0.0469688	-3.61896
QroP5K0lSg_kigsrt4	ZNF263	zinc finger protein 263	0.0990804	7.72645	3.24837	0.00221012	0.0112966	-1.91182
c5dMl5617CQkcJ1EuU	APOBEC3H	apolipoprotein B mRNA editing enzyme, catalytic polypeptide-like 3H	0.0989581	7.51078	6.0381	2.83955e-07	1.31976e-05	6.65699
chz.FUSog9bshAko1U	STT3B	STT3, subunit of the oligosaccharyltransferase complex, homolog B (S. cerevisiae)	0.0988963	7.74378	3.31999	0.00180211	0.00965934	-1.72201
x.Sd_F7Vd6eXeLeDdU	TOP2A	topoisomerase (DNA) II alpha 170kDa	0.0987815	7.47784	5.70348	8.84977e-07	3.1852e-05	5.55615
K_CHD6i1N3c_ker2Pk	SLC22A15	solute carrier family 22, member 15	0.0987016	7.61938	4.96709	1.04771e-05	0.000206603	3.17032
rVeyUoc57IzSzjeruk	ZCCHC9	zinc finger, CCHC domain containing 9	0.09867	7.90905	3.60387	0.000786506	0.00506269	-0.946236
BU6gOUeyttjF3p4KPk	TMPO	thymopoietin	0.0986127	7.50708	7.21316	5.20598e-09	6.64885e-07	10.537
38sFEL0KtAqFd7l998	ACSL5	acyl-CoA synthetase long-chain family member 5	0.0985374	7.70716	4.09119	0.000177475	0.00164627	0.461525
H6E7d6GE08B4FolJik	THOC4	THO complex 4	0.0985131	7.80023	3.19058	0.00260166	0.0127831	-2.06313
oiQAlB57SoemrMkXq0	NA	NA	0.0983152	7.76973	2.88434	0.00602234	0.0242852	-2.83578
ulJrj5x_Ky..EHFP1U	C3orf58	chromosome 3 open reading frame 58	0.0982069	7.57986	4.92972	1.18568e-05	0.000226007	3.05127
oRR6CRSTB7ihX1Ae6k	ZNF438	zinc finger protein 438	0.0981374	7.71374	3.9961	0.000238674	0.00205766	0.18014
WSbTRUt7dJ6LfV0SKE	CNTRL	centriolin	0.0981095	7.82089	3.61925	0.000751318	0.00488412	-0.903213
ZWuWSDjpVDVutSNPzI	FNTA	farnesyltransferase, CAAX box, alpha	0.0980463	7.94617	3.36879	0.00156621	0.00864811	-1.59125
xuRMoOJ9I5L6UkCIuM	ROCK1	Rho-associated, coiled-coil containing protein kinase 1	0.0979803	7.55848	4.32265	8.54088e-05	0.000944671	1.1583
0SXIpJz.FN6z863D_w	PMAIP1	phorbol-12-myristate-13-acetate-induced protein 1	0.0979444	7.54306	3.81457	0.000417056	0.00309523	-0.348374
EZ3XJG1P1KKIJCSOIo	SEC23IP	SEC23 interacting protein	0.097926	7.64718	5.76809	7.10883e-07	2.73065e-05	5.76816
BX5KiBrh.s_07uafXs	CASZ1	castor zinc finger 1	0.0978631	7.67218	4.27703	9.87592e-05	0.00105415	1.01971
xtPfn5H1XPhE4Ce764	UBE2K	ubiquitin-conjugating enzyme E2K	0.0976779	7.82669	4.34024	8.07475e-05	0.000905963	1.21188
N6J54lExT55PfqqJ54	NAE1	NEDD8 activating enzyme E1 subunit 1	0.0976442	7.95037	2.70216	0.00971148	0.0350973	-3.27025
3BS2ubi9ehpFZCFBBM	PML	promyelocytic leukemia	0.0975739	7.46172	5.69026	9.25512e-07	3.27779e-05	5.51281
uuJ4hIwiDF_t0XNeV0	CASP7	caspase 7, apoptosis-related cysteine peptidase	0.0974814	7.4919	7.31676	3.6666e-09	5.54941e-07	10.8773
6qyJeQheIX1D564ro4	FAM82A2	family with sequence similarity 82, member A2	0.0973092	8.08726	3.00332	0.00436912	0.0190048	-2.54165
ZdIDrSOtKJSc5JLMU0	ZDHHC17	zinc finger, DHHC-type containing 17	0.0972547	7.83732	2.68438	0.0101657	0.0364155	-3.31158
ZnvVZDjg6k6.p4Efkg	NA	NA	0.0972215	7.82968	3.13775	0.00301622	0.0143335	-2.2
ZUj8k65UD6VSQkGX3g	NA	NA	0.0972184	7.55155	4.82972	1.64914e-05	0.000286023	2.73399
ifkXu5MB7y24eH67vk	ADO	2-aminoethanethiol (cysteamine) dioxygenase	0.0971822	7.82621	3.63636	0.000713933	0.00469277	-0.855216
96sLvRx.148Kje56oE	CAND1	cullin-associated and neddylation-dissociated 1	0.0971197	7.64266	4.2055	0.000123886	0.0012543	0.803625
cPOnvClqauHSkrDVIE	CHST12	carbohydrate (chondroitin 4) sulfotransferase 12	0.0970201	7.69267	3.60396	0.000786295	0.00506269	-0.945983
fXjLe7Ek_.7eoJKj54	RBM45	RNA binding motif protein 45	0.0966632	7.6047	5.65304	1.04986e-06	3.57519e-05	5.39084
fai.aRIc1TQlvp1.Sc	ZMYND8	zinc finger, MYND-type containing 8	0.0966606	7.6364	6.55281	4.91432e-08	3.53751e-06	8.35806
QlPfTT78D.p6OUBXqE	DHX36	DEAH (Asp-Glu-Ala-His) box polypeptide 36	0.0965397	7.6391	4.55414	4.05736e-05	0.00055098	1.8701
o7jk77Z.VFWo3U3d9U	FAM156A	family with sequence similarity 156, member A	0.0964548	7.69402	3.77149	0.0004754	0.00342629	-0.472039
BRIrveF5B_HqCVerBE	CPEB3	cytoplasmic polyadenylation element binding protein 3	0.0963547	7.7279	4.10731	0.000168739	0.00157903	0.509517
cEKReT0SmleJF6veH8	NA	NA	0.0962788	7.63931	4.17813	0.000135065	0.00133691	0.72134
xniZB5VN4UeHQMYHn4	WDR41	WD repeat domain 41	0.0961181	7.57669	4.02878	0.000215629	0.00190632	0.276514
ljdHhW_V7BR.f19.5c	STRN3	striatin, calmodulin binding protein 3	0.0961122	7.68333	3.43982	0.0012748	0.00737476	-1.39897
ilEApPd7XFye0fd7kk	TLR2	toll-like receptor 2	0.096105	7.61105	4.10254	0.00017128	0.00159885	0.495306
BUxJ_hITrr3j5eojJU	NA	NA	0.0959698	7.79728	2.70807	0.00956452	0.0346925	-3.25646
rlnUn_Rv2NUClf.Klg	HIST2H4A	histone cluster 2, H4a	0.0959424	7.6244	3.76975	0.000477919	0.00343754	-0.477028
l6KU4uK4CXjv.VpS74	VPS33B	vacuolar protein sorting 33 homolog B (yeast)	0.0959202	7.72271	3.62109	0.000747203	0.00485915	-0.898049
Nyg7UU4H4xtbu1SOe0	SCD	stearoyl-CoA desaturase (delta-9-desaturase)	0.0958479	7.54755	4.33571	8.19234e-05	0.000916832	1.19808
NS5Id0eAnnP9Ndfuvk	GLCE	glucuronic acid epimerase	0.0958076	7.56574	4.52321	4.48476e-05	0.000593253	1.77419
Wxhx2VzpzxpxpVpxhw	HNRNPAB	heterogeneous nuclear ribonucleoprotein A/B	0.0955607	7.64172	4.87691	1.41165e-05	0.000257441	2.88348
NkooiYR_3qKQOt.44Y	BCCIP	BRCA2 and CDKN1A interacting protein	0.0955373	7.75991	4.13914	0.000152701	0.00146322	0.604521
ZjxeiXolH8L7H3hwHo	ABCE1	ATP-binding cassette, sub-family E (OABP), member 1	0.0955347	7.68987	3.37354	0.00154488	0.0085597	-1.57846
HpQklBTnQfa5d3Ukh4	KLF10	Kruppel-like factor 10	0.0955007	7.51132	5.7308	8.06717e-07	3.00744e-05	5.64575
0t1UXM.OrvJkHn_cvk	PTPN11	protein tyrosine phosphatase, non-receptor type 11	0.0954572	7.89422	2.80453	0.0074399	0.0285171	-3.02853
TUn0kjzm3hKBFVZ83Q	MAPK14	mitogen-activated protein kinase 14	0.0954547	7.59262	4.94779	1.11686e-05	0.000216147	3.10881
EafR6Ev9fIKy.7uHuE	ACTR6	ARP6 actin-related protein 6 homolog (yeast)	0.0954525	7.5786	3.21963	0.00239732	0.0120056	-1.98729
f7HsF0QdQtRIM.QHko	NA	NA	0.0954216	7.54061	3.01912	0.00418464	0.0184378	-2.50198
cnvl0IALn.3U6OKchU	ABCB10	ATP-binding cassette, sub-family B (MDR/TAP), member 10	0.0953259	7.71437	3.34619	0.00167158	0.0090938	-1.65196
97CRbQTSEXHToTuvlo	STAMBPL1	STAM binding protein-like 1	0.0951136	7.7908	2.66889	0.0105776	0.0375232	-3.34744
K9jjedE9ed3Fx9_s9Y	CWF19L2	CWF19-like 2, cell cycle control (S. pombe)	0.0951107	7.63137	3.8904	0.000330738	0.00260858	-0.129046
6ut9ioyRiut4ShwR8U	TIMM23	translocase of inner mitochondrial membrane 23 homolog (yeast)	0.0950775	7.73478	4.07419	0.000187163	0.00171164	0.411002
3deudXerVXr77JJ8Hs	SOCS1	suppressor of cytokine signaling 1	0.0950771	7.59719	3.37497	0.00153856	0.00853267	-1.57463
HkE1w_nS5G.pDLlJe0	UCHL5	ubiquitin carboxyl-terminal hydrolase L5	0.0948263	7.62931	4.24798	0.0001083	0.00112546	0.931769
WNQVcgWb6v7q7dudJQ	ABCG1	ATP-binding cassette, sub-family G (WHITE), member 1	0.0947284	7.70529	2.70925	0.00953545	0.0346154	-3.25371
32XiiRKCAggmeSvl64	MSL3	male-specific lethal 3 homolog (Drosophila)	0.0946884	7.96333	2.51987	0.015396	0.0496055	-3.68457
iuuUy.tNXq3KAy0MBI	TSEN15	tRNA splicing endonuclease 15 homolog (S. cerevisiae)	0.0945379	7.76077	3.08537	0.00348814	0.0160353	-2.33427
BP.EeqQyHKK3eP3360	MRPS35	mitochondrial ribosomal protein S35	0.0944783	7.79952	3.83882	0.00038732	0.00293161	-0.278456
HVRNhyS8dP591c7VeE	MSL3	male-specific lethal 3 homolog (Drosophila)	0.094436	7.82413	3.73375	0.000532902	0.00374845	-0.57977
TT9JiEC5O.82LFe5FE	TMX3	thioredoxin-related transmembrane protein 3	0.094152	7.6727	3.21996	0.00239507	0.0119977	-1.98642
iSsDEci5yOX.1XtL_E	IKZF5	IKAROS family zinc finger 5 (Pegasus)	0.0938753	7.63772	4.55899	3.99406e-05	0.00054489	1.88517
uXhfoe.h5Any6XErp4	MKKS	McKusick-Kaufman syndrome	0.0936076	7.8551	2.70851	0.00955369	0.0346745	-3.25544
iSehC.8DhFFCXupfdc	BCCIP	BRCA2 and CDKN1A interacting protein	0.0935708	7.68972	5.53337	1.57348e-06	4.88829e-05	4.99952
0Y0MlXDRO55AyX14XU	NA	NA	0.0935426	8.23087	2.63325	0.0115836	0.0401806	-3.42934
3984BKesiiv3iXJUKk	PRMT6	protein arginine methyltransferase 6	0.0932468	7.68185	4.69839	2.53719e-05	0.000389022	2.32024
ih616tFeUR_.XLv3uk	MUDENG	MU-2/AP1M2 domain containing, death-inducing	0.093246	7.7011	4.28517	9.62378e-05	0.00103472	1.04438
H0gTUBdCnSjVMhSJUU	SMARCE1	SWI/SNF related, matrix associated, actin dependent regulator of chromatin, subfamily e, member 1	0.093118	7.80415	3.0947	0.00339925	0.0157205	-2.31045
f5XihS4CEjTKIhX.nk	ZNF622	zinc finger protein 622	0.09311	8.35164	3.41221	0.00138134	0.00783244	-1.47399
oWp20SO0BV03.p5Mg4	WDR67	WD repeat domain 67	0.0928662	7.68562	4.28084	9.75713e-05	0.00104462	1.03126
iNSrSUu_AiE.7cXpHk	ZMYM6	zinc finger, MYM-type 6	0.0928073	8.72524	2.54165	0.0145851	0.0476784	-3.63619
ieAgke2dzggSeqZez4	NA	NA	0.0926604	8.06793	3.20511	0.00249751	0.0123847	-2.02526
cV1IC9EGk6OF0.yOpE	GOSR2	golgi SNAP receptor complex member 2	0.0925629	7.62602	4.74945	2.14669e-05	0.000344015	2.48068
9eHhRVdIkSNKhdGTd8	TUBG1	tubulin, gamma 1	0.0924841	7.61535	4.66333	2.84494e-05	0.000419818	2.2104
cubXPi0ecP34l6z_eU	ENPP4	ectonucleotide pyrophosphatase/phosphodiesterase 4 (putative)	0.0923936	7.54724	4.31648	8.71057e-05	0.00095568	1.13952
rvSXzV_kbASHHIfPso	IMPA1	inositol(myo)-1(or 4)-monophosphatase 1	0.0923359	7.66923	3.547	0.000930909	0.00579421	-1.10451
9frp4DR1AKSJXrF4S4	ENY2	enhancer of yellow 2 homolog (Drosophila)	0.0922959	7.76702	3.17011	0.00275545	0.0133607	-2.11633
NoEh4gqQE9eonqQojU	NR1H3	nuclear receptor subfamily 1, group H, member 3	0.092293	7.56809	4.12539	0.000159435	0.00151058	0.563462
NotSc_ee_tU8JBxSP8	PMPCB	peptidase (mitochondrial processing) beta	0.0922669	8.22494	2.95541	0.00497584	0.0210439	-2.66104
0JL7gX.UjolGBBd1I0	BCL10	B-cell CLL/lymphoma 10	0.0921661	7.6426	4.25618	0.000105519	0.00110368	0.956576
Np1_oHiEzdKg67e50k	FIBP	fibroblast growth factor (acidic) intracellular binding protein	0.0921257	7.52073	6.42514	7.59394e-08	4.94973e-06	7.93582
Heq434Id4goI44Ka64	EXOSC9	exosome component 9	0.0920769	7.85957	2.64976	0.011107	0.038983	-3.39149
c57HPUV.oZdNShkih0	CLDN23	claudin 23	0.0915924	7.48253	6.39388	8.44794e-08	5.34751e-06	7.83244
TV8AtQN9_M_4FsVfUs	KPNA3	karyopherin alpha 3 (importin alpha 4)	0.091414	7.7591	2.66233	0.0107564	0.0380111	-3.36256
BTc8ulf_kkonSMRU6I	PWP1	PWP1 homolog (S. cerevisiae)	0.0913457	7.98643	3.092	0.0034248	0.0158222	-2.31736
3oVdQMr.n3rg360_rw	AGGF1	angiogenic factor with G patch and FHA domains 1	0.0912996	7.87502	2.74365	0.00872304	0.0323019	-3.17305
rumM4io5Ll.VT09eOg	RCAN1	regulator of calcineurin 1	0.0912629	7.56048	5.85222	5.34268e-07	2.16e-05	6.04468
cnugiRUsrik3McnF90	MTIF2	mitochondrial translational initiation factor 2	0.0912345	7.69318	3.95271	0.00027299	0.00227809	0.0527348
rCOmieZudsntCKtNhw	ETFB	electron-transfer-flavoprotein, beta polypeptide	0.0912166	7.97383	2.58359	0.0131323	0.0440763	-3.54216
ZAxQr1bwQPGl3n56A4	SLC16A6	solute carrier family 16, member 6 (monocarboxylic acid transporter 7)	0.0912163	7.67088	5.76941	7.07707e-07	2.72436e-05	5.77249
ufXxQuB1OlUCRSODvs	MERTK	c-mer proto-oncogene tyrosine kinase	0.0911904	7.48535	5.22642	4.4169e-06	0.000108181	4.00268
9nIOLxSIkn6ivj3rbY	ACADM	acyl-CoA dehydrogenase, C-4 to C-12 straight chain	0.0907808	7.77347	3.24398	0.0022378	0.0114035	-1.92338
ojLV_BETnlid6ABVEk	UBE2C	ubiquitin-conjugating enzyme E2C	0.0906366	7.53624	3.49391	0.00108835	0.00654414	-1.25099
WQnpIpT_6AuiJxuuls	HMGCL	3-hydroxymethyl-3-methylglutaryl-CoA lyase	0.0904244	7.60557	4.66585	2.82164e-05	0.000418847	2.21828
W6vlrSJ8IockV5DlXc	MPV17	MpV17 mitochondrial inner membrane protein	0.0902872	7.97291	2.60209	0.0125345	0.0426276	-3.50032
0eyOe_OOU9QnwNf10Q	PICALM	phosphatidylinositol binding clathrin assembly protein	0.0901939	7.83339	3.43787	0.00128205	0.00740079	-1.40428
f5woU84pxJDkWpJJQo	PSMD10	proteasome (prosome, macropain) 26S subunit, non-ATPase, 10	0.0901724	7.61716	4.1782	0.000135032	0.00133691	0.721575
ok_Dr7yklO50EeP0Xc	ATAD1	ATPase family, AAA domain containing 1	0.0900325	7.702	3.20579	0.0024927	0.0123678	-2.02348
HUUX_KF27VAIf5c1SQ	SLC43A3	solute carrier family 43, member 3	0.090026	7.56371	4.7907	1.8749e-05	0.00031511	2.6107
Z90vg5FB6.i17iT0tI	NDFIP1	Nedd4 family interacting protein 1	0.0899728	7.65345	4.46779	5.36323e-05	0.00067213	1.60298
lpGMAlO_LpUrS.niBg	TCEB1	transcription elongation factor B (SIII), polypeptide 1 (15kDa, elongin C)	0.0898402	8.25503	2.62937	0.0116983	0.0404595	-3.43821
QrqXuuOv5NfXV_1QwI	RUSC1	RUN and SH3 domain containing 1	0.089792	8.06172	2.62631	0.0117894	0.0407033	-3.4452
9e33_XwKhH6U0.8p2A	FAM122B	family with sequence similarity 122B	0.0897207	7.72595	3.07847	0.00355523	0.0162688	-2.35184
3ipKh.vh5QNx3l.0uU	ZNF45	zinc finger protein 45	0.0896582	7.55538	7.00501	1.05462e-08	1.13873e-06	9.85175
oRj7p_O6QlgFH6d6A0	ST3GAL6	ST3 beta-galactoside alpha-2,3-sialyltransferase 6	0.0896144	7.59777	3.62964	0.000728392	0.00475167	-0.874074
opxN0zuc4ofclLq6Z4	NA	NA	0.0894664	7.57461	4.88583	1.3707e-05	0.000250748	2.91179
x4fi1EKEQEXiyepJX4	CCDC115	coiled-coil domain containing 115	0.089392	8.15435	2.59581	0.0127346	0.0431326	-3.51455
NirukA6Jf0TXLrpT_s	ARMCX3	armadillo repeat containing, X-linked 3	0.089275	7.51971	6.68363	3.14693e-08	2.49892e-06	8.7906
cS.0j7p1KX7v3T8LJE	ST8SIA4	ST8 alpha-N-acetyl-neuraminide alpha-2,8-sialyltransferase 4	0.0891839	7.8489	2.56564	0.0137368	0.0454847	-3.58253
9Cy6El6VTU8cO.y5Kk	PHKB	phosphorylase kinase, beta	0.0891384	7.54183	7.26977	4.2982e-09	5.8333e-07	10.723
KJLSlERT51QDofd5CU	APOBEC3F	apolipoprotein B mRNA editing enzyme, catalytic polypeptide-like 3F	0.088989	7.57202	5.06054	7.68256e-06	0.000162342	3.46907
Ql.de397vz06DVLzeo	SLFN11	schlafen family member 11	0.0889526	7.85292	2.61734	0.0120605	0.041365	-3.46566
6fvNFPUb5REK5Ep6C0	CPNE8	copine VIII	0.0887639	7.62432	4.39287	6.82332e-05	0.000803908	1.37275
T6yV_d4._U9IDuFadQ	SMC3	structural maintenance of chromosomes 3	0.0885054	7.89887	2.724	0.00917887	0.0335895	-3.21921
ieUy8Xo_0l_sl.twLU	CHM	choroideremia (Rab escort protein 1)	0.0884977	7.59951	4.38714	6.94983e-05	0.000815557	1.35519
Hs5.f5fvXvdKuGHlFI	GRSF1	G-rich RNA sequence binding factor 1	0.0884556	7.99394	2.80748	0.00738253	0.0283456	-3.02149
QWtLCDlTUv9zP0y0CU	ANXA4	annexin A4	0.088373	7.50121	3.876	0.000345679	0.0026966	-0.170866
69KffSiAkLEesX6HuQ	SLC25A20	solute carrier family 25 (carnitine/acylcarnitine translocase), member 20	0.0883194	7.65349	3.50121	0.00106528	0.00643602	-1.23092
9bkrTn_iXOR7EQKQBU	TMEM206	transmembrane protein 206	0.0881663	7.6373	4.98315	9.93407e-06	0.000198771	3.22156
o_3lPEUgo5d4yihBTk	PDS5B	PDS5, regulator of cohesion maintenance, homolog B (S. cerevisiae)	0.0880646	7.60801	3.90832	0.000313016	0.00251641	-0.0768999
9pfR5xlXpVAEiJCEvs	PPP1R3D	protein phosphatase 1, regulatory (inhibitor) subunit 3D	0.0880588	7.77744	4.57917	3.74105e-05	0.000522038	1.94787
H34p74gHyhIJcXTVKU	NAGA	N-acetylgalactosaminidase, alpha-	0.088032	7.54573	5.09502	6.84978e-06	0.000149563	3.57961
iXu4qRBSlGoX3Nd7P4	GSS	glutathione synthetase	0.0879104	7.61113	4.48182	5.12618e-05	0.000653053	1.64624
WpOd.qJ5EvOqKHVHns	TLE4	transducin-like enhancer of split 4 (E(sp1) homolog, Drosophila)	0.0877015	7.68186	4.15033	0.000147419	0.0014265	0.638017
cRIq0i76Re31q3vRW0	NA	NA	0.0876927	7.64493	3.50784	0.00104475	0.00634009	-1.21268
EXfytHjrR1j3i5RPrI	GPR137B	G protein-coupled receptor 137B	0.0876862	7.66592	4.3998	6.6734e-05	0.000791511	1.39398
rud35wIWSIUxe_0CKs	ZNF627	zinc finger protein 627	0.0876505	7.6113	3.97532	0.000254553	0.0021614	0.119039
WU1wIe66LX7oHokJ_M	MCEE	methylmalonyl CoA epimerase	0.0875168	7.65731	4.00206	0.0002343	0.00202785	0.19769
Qp0RJ8Isnt3QG5nRL4	RBM15	RNA binding motif protein 15	0.0874329	7.82619	2.75939	0.008373	0.0312606	-3.1359
36UrIoHIAiP__Xv94U	C1GALT1	core 1 synthase, glycoprotein-N-acetylgalactosamine 3-beta-galactosyltransferase, 1	0.0874127	7.61121	3.43721	0.0012845	0.00740911	-1.40606
xkFFEWNPSSU0EuKQh4	ZNF621	zinc finger protein 621	0.0873784	7.58165	5.60477	1.23613e-06	4.05359e-05	5.23285
3qXVv3AkVHOjkSWhAc	NA	NA	0.0873631	7.49523	4.1292	0.000157541	0.00149664	0.574828
ug5nc7oi6VFOXRFMo4	PEX2	peroxisomal biogenesis factor 2	0.0873012	7.6419	2.85694	0.00647798	0.025634	-2.90238
ZlToS17t6OKKHS56SM	SDSL	serine dehydratase-like	0.0872086	7.54342	4.76382	2.04787e-05	0.000332694	2.52594
NUMU4L0p7jep1eH94I	DGUOK	deoxyguanosine kinase	0.0871262	8.92871	2.88558	0.0060024	0.0242167	-2.83275
ixRdX.VCkTYF4vJKCo	C7orf28B	chromosome 7 open reading frame 28B	0.0871242	7.83937	2.98187	0.00463163	0.0198781	-2.59526
Eks.sXUg6SNXSSgQKQ	ANKMY2	ankyrin repeat and MYND domain containing 2	0.0870517	7.57338	5.66115	1.02142e-06	3.51212e-05	5.4174
TVXshU9wO6l4rQ6iO4	XRN1	5'-3' exoribonuclease 1	0.0869285	7.48765	6.63663	3.6934e-08	2.83129e-06	8.63521
QTqiwyhSJrN3pFEcqE	PTPRA	protein tyrosine phosphatase, receptor type, A	0.0867665	8.0339	2.97064	0.00477482	0.0203937	-2.6232
EtIF_jxAF2JX3Sy654	SQLE	squalene epoxidase	0.0866933	7.62884	4.03866	0.000209097	0.00186346	0.305726
HeKiKiV1AfSNe6vyzQ	KLRAQ1	KLRAQ motif containing 1	0.0863638	8.07115	2.83947	0.00678494	0.0265461	-2.9446
issrn9eNV.mI57q5wQ	KCTD14	potassium channel tetramerisation domain containing 14	0.0863536	7.49237	4.35651	7.66563e-05	0.000871324	1.26154
oiYOUVYCjJMRnrqUOA	PPP3CC	protein phosphatase 3, catalytic subunit, gamma isozyme	0.0862158	7.95225	2.81415	0.00725405	0.0279675	-3.00551
Q5.pTkEgug9Xo4KW0U	RC3H2	ring finger and CCCH-type domains 2	0.0862025	7.72342	3.07777	0.00356215	0.016291	-2.35363
oVLqP09XJuujRUOUgg	HESX1	HESX homeobox 1	0.0861401	7.43154	4.16579	0.000140417	0.00137604	0.684339
9kfuiTSDpCvuv2l1HY	MRPL18	mitochondrial ribosomal protein L18	0.0860159	8.25307	2.61086	0.01226	0.041895	-3.48041
EnBRQpAkkS7gyBImo0	NUP62	nucleoporin 62kDa	0.0859409	7.58828	4.05053	0.00020151	0.00180492	0.34083
N4X93pVSdy7_LAoh4o	LRRC42	leucine rich repeat containing 42	0.0858308	7.58565	5.14454	5.80719e-06	0.000132177	3.73877
6km8elzs01tzp9RUt0	SLC26A8	solute carrier family 26, member 8	0.085681	7.51782	5.57686	1.35848e-06	4.40182e-05	5.14158
cy75e3vcCYFJR.9Dek	SNX16	sorting nexin 16	0.0856453	7.54395	3.42515	0.00133036	0.00761166	-1.43886
fcjV9PPfzlUiwNUjo0	TAF1B	TATA box binding protein (TBP)-associated factor, RNA polymerase I, B, 63kDa	0.0856418	7.53662	6.06267	2.61168e-07	1.23657e-05	6.73806
0lEaClSj.T6eFZ3DOw	HACL1	2-hydroxyacyl-CoA lyase 1	0.0856347	7.91276	2.54593	0.0144302	0.0472766	-3.62664
[truncated: 2,581 more rows]

## Sheet: DEGs on Day4
Differentially expressed genes on Day 4 of influenza virus infection
[truncated: 4,628 more rows]

## Sheet: DEGs on Day6
Differentially expressed genes on Day 6 of influenza virus infection
[truncated: 1,726 more rows]
